# Supplementary material for: Redox-active alkylsulfones as precursors for alkyl radicals under photoredox catalysis
Source: Royal Society of Chemistry journal article supplement (doi:10.1039/d2cc00163b), 2022-01-01

## Redox-active Alkylsulfones as a Precursor for Alkyl Radicals Under Photoredox Catalysis

Sandeep Patel, Biprajit Paul,<sup>†</sup> Hrishikesh Paul,<sup>†</sup> Rajat Shankhdhar and Indranil Chatterjee\*[a]

*Department of Chemistry, Indian Institute of Technology Ropar  
Ropar, Punjab-140001, India  
Indranil.chatterjee@iitrpr.ac.in*

### Supporting Information

#### Table of Contents

|            |                                                                                                              |            |
|------------|--------------------------------------------------------------------------------------------------------------|------------|
| <b>1.0</b> | <b>General Information</b>                                                                                   | <b>S5</b>  |
| <b>2.0</b> | <b>List of substrates prepared</b>                                                                           | <b>S5</b>  |
| 2.1        | List of sulfone compounds prepared                                                                           | <b>S6</b>  |
| 2.2        | List of acceptors prepared                                                                                   | <b>S6</b>  |
| <b>3.1</b> | <b>Optimization Table (Tables S1–S5)</b>                                                                     | <b>S7</b>  |
| <b>3.2</b> | <b>Cyclic voltammetry:</b>                                                                                   | <b>S9</b>  |
| <b>4.0</b> | <b>General Procedure</b>                                                                                     | <b>S11</b> |
| 4.1        | General Procedure 1: Mitsunobu reaction of thiol with alkyl alcohols (GP-1).                                 | <b>S11</b> |
| 4.2        | General Procedure 2: Oxidation with mCPBA (GP-2).                                                            | <b>S12</b> |
| 4.3        | General Procedure 3: Preparation of tertiary sulfones from primary sulfones (GP-3).                          | <b>S12</b> |
| 4.4        | General Procedure 4: Preparation of tertiary sulfones from secondary sulfones (GP-4).                        | <b>S13</b> |
| 4.5        | General Procedure 5: Preparation of compound <b>2l</b> , <b>2m</b> for Intramolecular Giese reaction (GP-5). | <b>S13</b> |
| 4.6        | General Procedure 6: Photocatalytic Desulfonative Coupling (GP-6).                                           | <b>S13</b> |
| 4.7        | General Procedure 7: Intramolecular Giese reaction of tertiary sulfone (GP-7).                               | <b>S14</b> |
| 4.8        | General Procedure 8: Photocatalytic Desulfonative Coupling with allyl sulfone (GP-8)                         | <b>S14</b> |

|            |                                                                                                                                                                     |            |
|------------|---------------------------------------------------------------------------------------------------------------------------------------------------------------------|------------|
| <b>5.0</b> | <b>Mechanistic study and proposal</b>                                                                                                                               | <b>S15</b> |
| 5.1        | Using TEMPO as radical scavenger                                                                                                                                    | S15        |
| 5.2        | Fluorescence quenching experiments                                                                                                                                  | S15        |
| <b>6.0</b> | <b>Reference:</b>                                                                                                                                                   | <b>S18</b> |
| <b>7.0</b> | <b>Experimental Details for the Synthesized Starting Materials Sulfones</b>                                                                                         | <b>S19</b> |
| 7.1        | 2-((2-cyclohexylpropan-2-yl)sulfonyl)benzo[d]thiazole ( <b>1f</b> )                                                                                                 | S19        |
| 7.2        | 2-((2-methyl-4-phenylbutan-2-yl)sulfonyl)benzo[d]thiazole ( <b>1g</b> )                                                                                             | S19        |
| 7.3        | 2-((2-methylhexan-2-yl)sulfonyl)benzo[d]thiazole ( <b>1h</b> )                                                                                                      | S19        |
| 7.4        | 2-((1-methylcyclopentyl)sulfonyl)benzo[d]thiazole ( <b>1i</b> )                                                                                                     | S19        |
| 7.5        | 2-((difluoro(phenyl)methyl)sulfonyl)benzo[d]thiazole ( <b>1j</b> )                                                                                                  | S20        |
| 7.6        | 2-(isopropylsulfonyl)benzo[d]thiazole ( <b>1k</b> )                                                                                                                 | S20        |
| 7.7        | 2-((1-phenylpropan-2-yl)sulfonyl)benzo[d]thiazole ( <b>1l</b> )                                                                                                     | S20        |
| 7.8        | 2-(cyclopentylsulfonyl)benzo[d]thiazole ( <b>1m</b> )                                                                                                               | S21        |
| 7.9        | 2-(cyclohexylsulfonyl)benzo[d]thiazole ( <b>1n</b> )                                                                                                                | S21        |
| 7.10       | 2-(pentylsulfonyl)benzo[d]thiazole ( <b>1o</b> )                                                                                                                    | S21        |
| 7.11       | 2-(butylsulfonyl)benzo[d]thiazole ( <b>1p</b> )                                                                                                                     | S22        |
| 7.12       | 2-(phenethylsulfonyl)benzo[d]thiazole ( <b>1q</b> )                                                                                                                 | S22        |
| 7.13       | 2-((cyclohexylmethyl)sulfonyl)benzo[d]thiazole ( <b>1r</b> )                                                                                                        | S22        |
| 7.14       | 2-((3-bromopropyl)sulfonyl)benzo[d]thiazole ( <b>1s</b> )                                                                                                           | S23        |
| 7.15       | 2-((4-chlorobutyl)sulfonyl)benzo[d]thiazole ( <b>1t</b> )                                                                                                           | S23        |
| 7.16       | 2-((2,2,2-trifluoroethyl)sulfonyl)benzo[d]thiazole ( <b>1u</b> )                                                                                                    | S23        |
| 7.17       | 2-(benzylsulfonyl)benzo[d]thiazole ( <b>1v</b> )                                                                                                                    | S24        |
| 7.18       | 3-(benzo[d]thiazol-2-ylsulfonyl)propyl pivalate ( <b>1w</b> )                                                                                                       | S24        |
| 7.19       | 2-((3-((tert-butyldimethylsilyl)oxy)propyl)sulfonyl)benzo[d]thiazole ( <b>1x</b> )                                                                                  | S24        |
| 7.20       | methyl (R)-4-((2R,5R,8R,9S,10S,13R,14S,17R)-2-(benzo[d]thiazol-2-ylsulfonyl)-10,13-dimethylhexadecahydro-1H-cyclopenta[a]phenanthren-17-yl)pentanoate ( <b>1y</b> ) | S25        |
| 7.21       | benzyl ( <i>E</i> )-7-(1-(benzo[d]thiazol-2-ylsulfonyl)cyclopentyl)hept-2-enoate ( <b>2l</b> )                                                                      | S25        |
| 7.22       | benzyl ( <i>E</i> )-6-(1-(benzo[d]thiazol-2-ylsulfonyl)cyclohexyl)hex-2-enoate ( <b>2m</b> )                                                                        | S26        |
| <b>8.0</b> | <b>Experimental Details for the Substrate Scope</b>                                                                                                                 | <b>S26</b> |
| 8.1        | benzyl 3-(1-tosylpiperidin-4-yl)propanoate ( <b>3aa</b> )                                                                                                           | S26        |
| 8.2        | ethyl 3-(1-tosylpiperidin-4-yl)propanoate ( <b>3ab</b> )                                                                                                            | S27        |
| 8.3        | methyl 3-(1-tosylpiperidin-4-yl)propanoate ( <b>3ac</b> )                                                                                                           | S27        |

|      |                                                                                                                       |            |
|------|-----------------------------------------------------------------------------------------------------------------------|------------|
| 8.4  | (1 <i>S</i> ,2 <i>R</i> ,5 <i>S</i> )-2-isopropyl-5-methylcyclohexyl 3-(1-tosylpiperidin-4-yl)propanoate <b>(3ad)</b> | <b>S27</b> |
| 8.5  | benzyl 2-methyl-3-(1-tosylpiperidin-4-yl)propanoate <b>(3ae)</b>                                                      | <b>S28</b> |
| 8.6  | 4-(2-(phenylsulfonyl)ethyl)-1-tosylpiperidine <b>(3af)</b>                                                            | <b>S28</b> |
| 8.7  | 3-(1-tosylpiperidin-4-yl)propanenitrile <b>(3ag)</b>                                                                  | <b>S29</b> |
| 8.8  | N,N-diphenyl-3-(1-tosylpiperidin-4-yl)propanamide <b>(3ah)</b>                                                        | <b>S29</b> |
| 8.9  | benzyl 4-cyclohexyl-4-methylpentanoate <b>(3fa)</b>                                                                   | <b>S30</b> |
| 8.10 | benzyl 4,4-dimethyl-6-phenylhexanoate <b>(3ga)</b>                                                                    | <b>S30</b> |
| 8.11 | benzyl 4,4-dimethyloctanoate <b>(3ha)</b>                                                                             | <b>S30</b> |
| 8.12 | benzyl 3-(1-methylcyclopentyl)propanoate <b>(3ia)</b>                                                                 | <b>S31</b> |
| 8.13 | benzyl 4,4-difluoro-4-phenylbutanoate <b>(3ja)</b>                                                                    | <b>S31</b> |
| 8.14 | benzyl 4-methylpentanoate <b>(3ka)</b>                                                                                | <b>S32</b> |
| 8.15 | benzyl ( <i>R</i> )-4-methyl-5-phenylpentanoate <b>(3la)</b>                                                          | <b>S32</b> |
| 8.16 | benzyl 3-cyclopentylpropanoate <b>(3ma)</b>                                                                           | <b>S32</b> |
| 8.17 | benzyl 3-cyclohexylpropanoate <b>(3na)</b>                                                                            | <b>S33</b> |
| 8.18 | benzyl octanoate <b>(3oa)</b>                                                                                         | <b>S33</b> |
| 8.19 | benzyl heptanoate <b>(3pa)</b>                                                                                        | <b>S34</b> |
| 8.20 | benzyl 5-phenylpentanoate <b>(3qa)</b>                                                                                | <b>S34</b> |
| 8.21 | benzyl 4-cyclohexylbutanoate <b>(3ra)</b>                                                                             | <b>S34</b> |
| 8.22 | benzyl 6-bromohexanoate <b>(3sa)</b>                                                                                  | <b>S35</b> |
| 8.23 | benzyl 8-chlorooctanoate <b>(3ta)</b>                                                                                 | <b>S35</b> |
| 8.24 | benzyl 5, 5, 5-trifluoropentanoate <b>(3ua)</b>                                                                       | <b>S35</b> |
| 8.25 | benzyl 4-phenylbutanoate <b>(3va)</b>                                                                                 | <b>S36</b> |
| 8.26 | benzyl 2-(spiro[4.5]decan-6-yl)acetate <b>(3l')</b>                                                                   | <b>S36</b> |
| 8.27 | benzyl 2-(spiro[4.5]decan-1-yl)acetate <b>(3m')</b>                                                                   | <b>S37</b> |
| 8.28 | ethyl 2-((1-tosylpiperidin-4-yl)methyl)acrylate <b>(5aa)</b>                                                          | <b>S37</b> |
| 8.29 | 2-((1-tosylpiperidin-4-yl)methyl)acrylic acid <b>(5ab)</b>                                                            | <b>S37</b> |
| 8.30 | ethyl 4-cyclohexyl-4-methyl-2-methylenepentanoate <b>(5fa)</b>                                                        | <b>S38</b> |

|      |                                                                                                                                                                 |            |
|------|-----------------------------------------------------------------------------------------------------------------------------------------------------------------|------------|
| 8.31 | ethyl 4-methyl-2-methylene-5-phenylpentanoate ( <b>5la</b> )                                                                                                    | <b>S38</b> |
| 8.32 | ethyl 2-methylene-5-phenylpentanoate ( <b>5qa</b> )                                                                                                             | <b>S39</b> |
| 8.33 | ethyl 2-methylene-6-(pivaloyloxy)hexanoate ( <b>5wa</b> )                                                                                                       | <b>S39</b> |
| 8.34 | ethyl 6-((tert-butyldimethylsilyl)oxy)-2-methylenehexanoate ( <b>5xa</b> )                                                                                      | <b>S39</b> |
| 8.35 | methyl (R)-4-((2S,5S,8R,9S,10S,13R,14S,17R)-2-(2-(ethoxycarbonyl)allyl)-10,13-dimethylhexadecahydro-1H-cyclopenta[a]phenanthren-17-yl)pentanoate ( <b>5ya</b> ) | <b>S40</b> |



## 1. General Information:

All reactions were performed in flame-dried glassware under an argon atmosphere unless otherwise stated. Liquids and solutions were transferred with syringes. Solvents used were dried and purified by following standard procedures. Technical grade solvents for extraction or chromatography (ethyl acetate, and petroleum ether) were distilled before use.  $\text{CDCl}_3$  was stored over 4Å molecular sieves. Chemicals used in this project were purchased from Sigma-Aldrich, TCI, Alfa-Aesar and Sisco Research Laboratories (SRL) and used without further purification. All the liquid chemicals were distilled freshly prior to use. Blue leds GRPAR38-24W were purchased from ABI. Analytical thin-layer chromatography (TLC) was performed on using pre-coated aluminium-backed plates (Merck Kieselgel 60 F254) and visualized by UV radiation, basic aqueous potassium permanganate ( $\text{KMnO}_4$ ), *p*-anisaldehyde stains as developing agents.

Flash column chromatography was performed on silica gel 60 (40–63  $\mu\text{m}$ , 230–400 mesh, ASTM) from Merck using the indicated solvents. Organic solutions were concentrated under reduced pressure on Heidolph rotary evaporator. NMR spectra were acquired on a JEOL JNM ECS-400, instrument running at 400 MHz for  $^1\text{H}$ , 101 MHz  $^{13}\text{C}$  and 376 MHz for  $^{19}\text{F}$ . Chemical shifts ( $\delta$ ) are reported in ppm relative to residual solvent signals ( $\text{CHCl}_3$ , 7.26 ppm for  $^1\text{H}$  NMR,  $\text{CDCl}_3$ , 77.16 ppm for  $^{13}\text{C}$  NMR). Data are reported as follows: chemical shift, multiplicity (br = broad singlet, s = singlet, d = doublet, dd = doublet of doublets, t = triplet, q = quartet, ddd = doublet of doublet of doublet, td = triplet of doublet, m = multiplet), coupling constants (Hz), and integration. All fluorescence data were recorded using Perkin Elmer LS55 fluorescence spectrophotometer instrument.

**Figure S1:** Photochemical reaction set up.

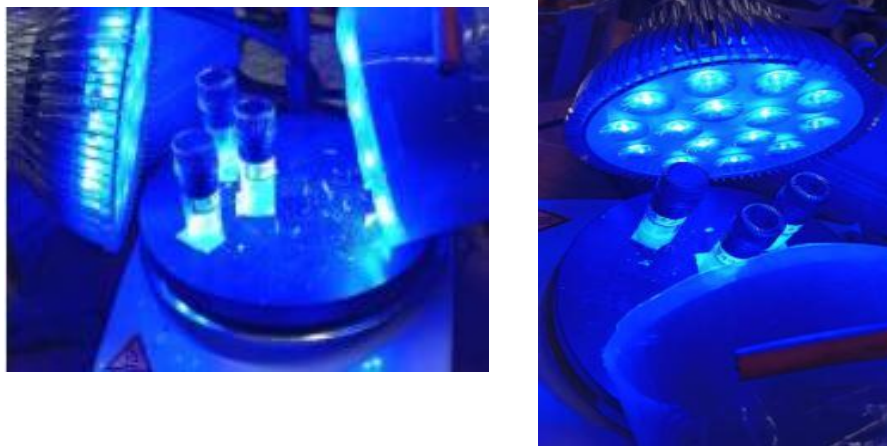

## 2. List of starting substrates prepared:

### 2.1 List of sulfone compounds prepared:<sup>[S1-S2]</sup>

The lists of substrates prepared according to **GP-1–GP-4** are given bellow.

**List of successful sulfones**

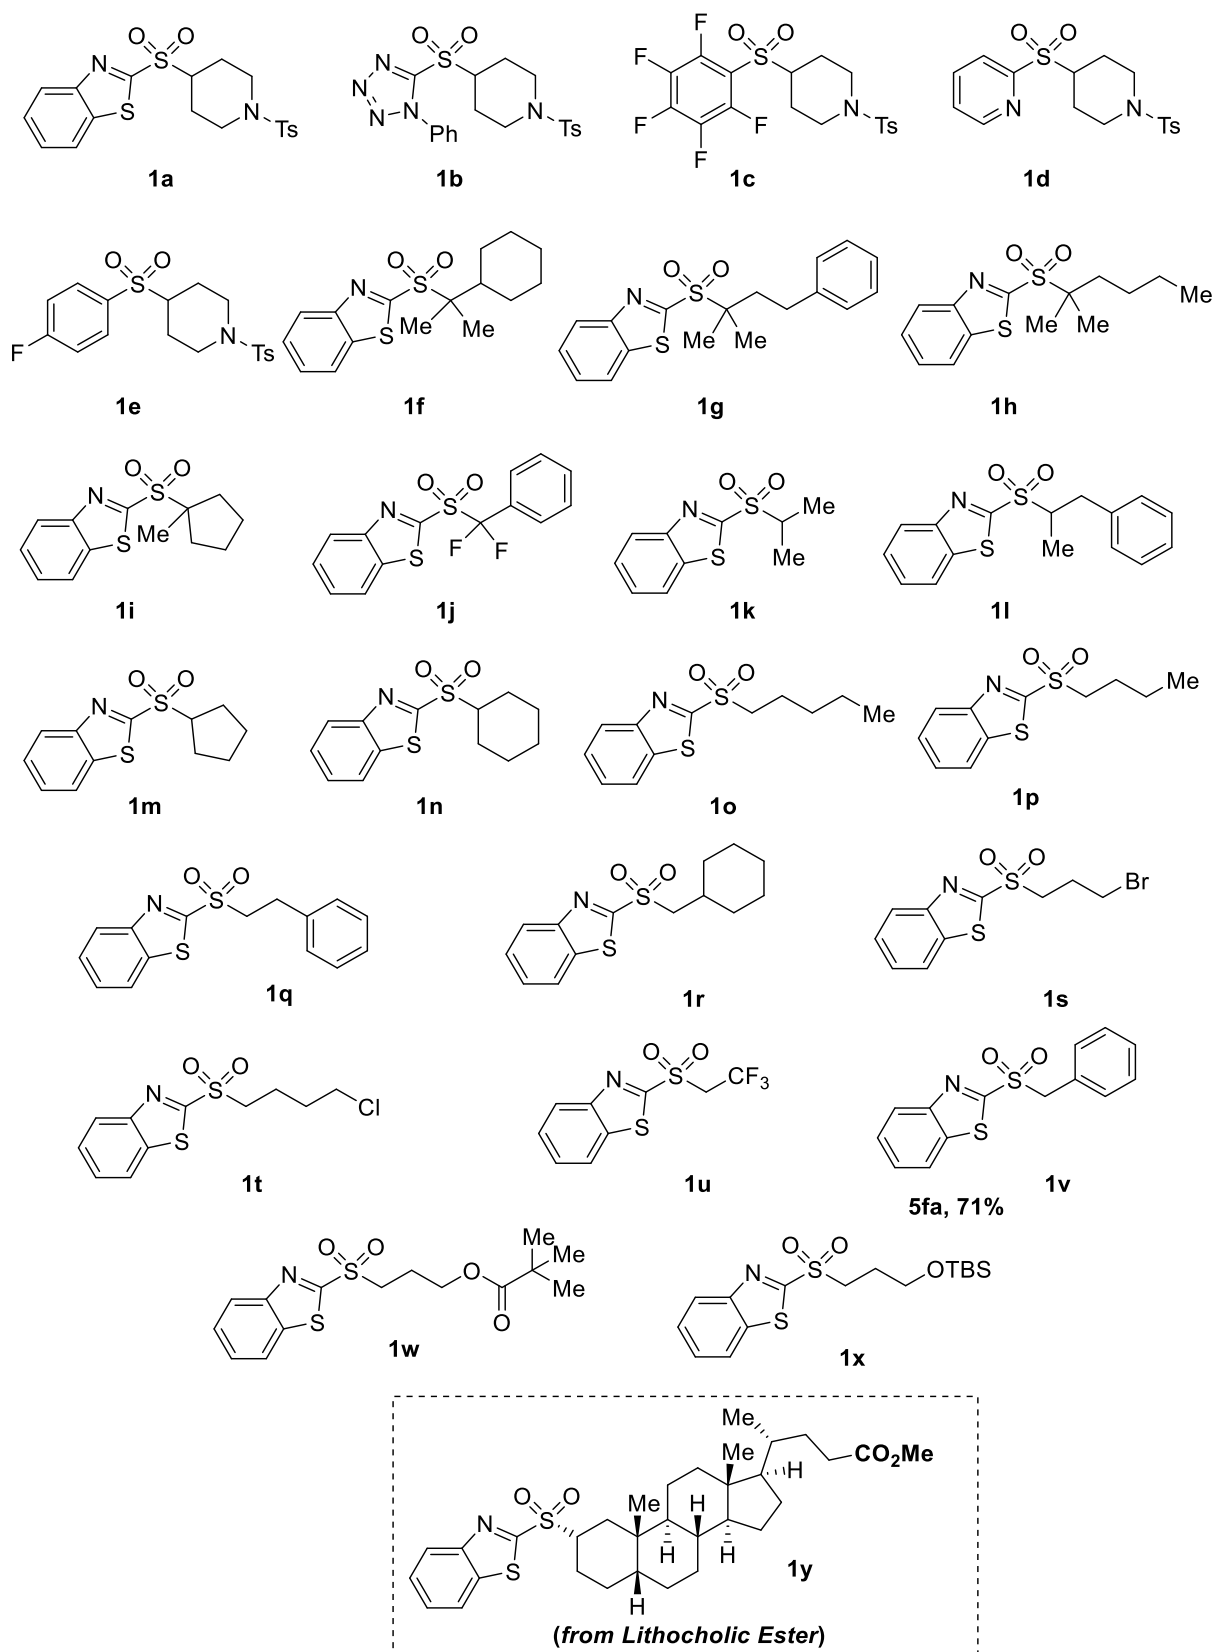

**2.2 List of acceptors prepared:**

All acceptors were prepared according to the previous literatures.<sup>[S2-S3]</sup>

**List of successful acceptors**

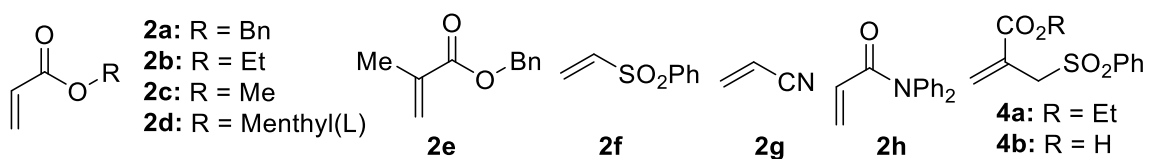

**List of Unsuccessful acceptors**

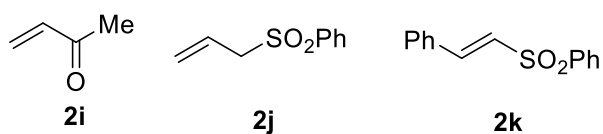

**Starting substrates for intramolecular reaction**

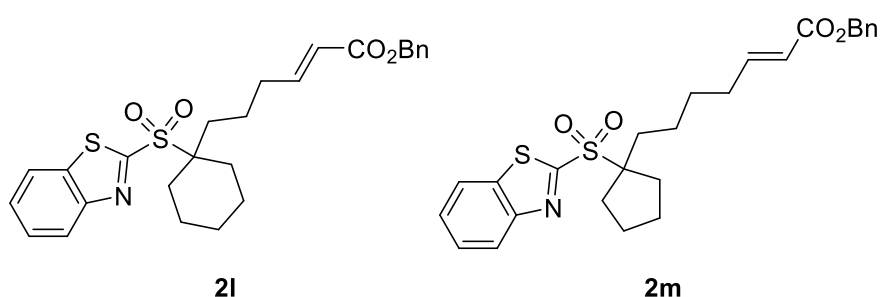

**3.1 Optimization Table:**

**Table S1:** Evaluation of solvents<sup>[a]</sup>

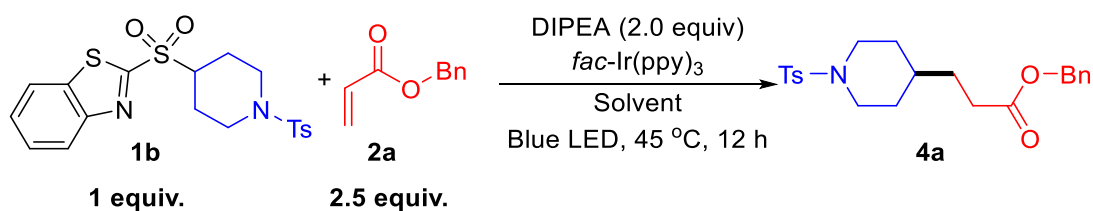

| Entry | Solvent (0.1 M)   | Yield (%) <sup>[b]</sup> |
|-------|-------------------|--------------------------|
| 1     | MeCN              | n.r.                     |
| 2     | THF               | 59%                      |
| 3     | DMA               | 35%                      |
| 4     | 1,4-dioxane       | n.r.                     |
| 5     | Et <sub>2</sub> O | n.r.                     |
| 6     | DCM               | n.r.                     |
| 7     | DMSO              | 54%                      |
| 8     | DMF               | n.r.                     |
| 9     | DCE               | 49%                      |

|    |      |      |
|----|------|------|
| 10 | NMP  | 32%  |
| 11 | DMPU | 30%  |
| 12 | MeOH | n.r. |
| 13 | HFIP | n.r. |

<sup>[a]</sup>Reactions were carried out in 0.1 mmol scale. <sup>[b]</sup>Yields reported are the isolated yield.

**Table S2: Evaluation of reductant<sup>[a]</sup>**

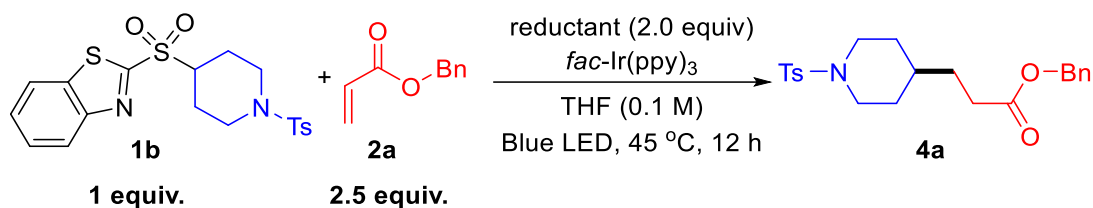

| Entry    | Reductant             | Yield (%) <sup>[b]</sup> |
|----------|-----------------------|--------------------------|
| 1        | DIPEA                 | 59%                      |
| 2        | Diisobutylamine       | trace                    |
| 3        | Diisopropylamine      | trace                    |
| 4        | Piperidine            | n.r.                     |
| 5        | Pyrrolidine           | 35%                      |
| 6        | TEA                   | 20%                      |
| <b>7</b> | <b>Hantzsch ester</b> | <b>70%</b>               |
| 8        | Hantzsch ester/TMP    | 35%                      |
| 9        | NMP                   | n.r.                     |

<sup>[a]</sup>Reactions were carried out in 0.1 mmol scale. <sup>[b]</sup>Yields reported are the isolated yield.

**Table S3: Evaluation of Catalyst<sup>[a]</sup>**

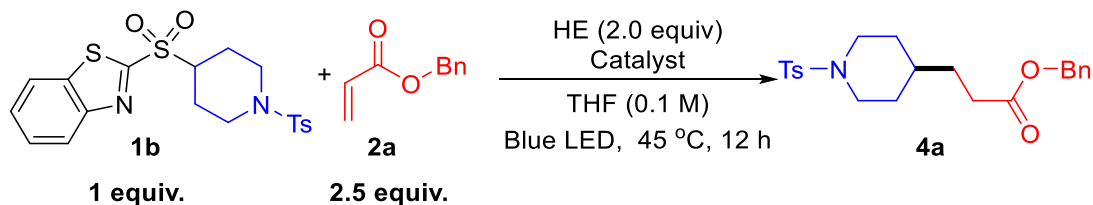

| Entry    | Catalyst                              | Yield (%) <sup>[b]</sup> |
|----------|---------------------------------------|--------------------------|
| <b>1</b> | <b><i>fac</i>-Ir(ppy)<sub>3</sub></b> | <b>70%</b>               |
| 2        | 4-CzIPN                               | n.r.                     |
| 3        | Eosin Y <sup>[c]</sup>                | n.r.                     |

|   |                                                                            |       |
|---|----------------------------------------------------------------------------|-------|
| 4 | Acridinium                                                                 | n.r.  |
| 5 | $\text{Ru}(\text{bpy})_3(\text{PF}_6)_2$                                   | trace |
| 6 | $[\text{Ir}(\text{dtbbpy})(\text{ppy})_2]\text{PF}_6$                      | 50%   |
| 7 | $(\text{Ir}[\text{dF}(\text{CF}_3)\text{ppy}]_2(\text{dtbpy}))\text{PF}_6$ | 32%   |

<sup>[a]</sup>Reactions were carried out in 0.1 mmol scale. <sup>[b]</sup>Yields reported are the isolated yield. <sup>[c]</sup>Green light as a light source

**Table S4:** Evaluation of solvents mixture with best reductant HE<sup>[a]</sup>

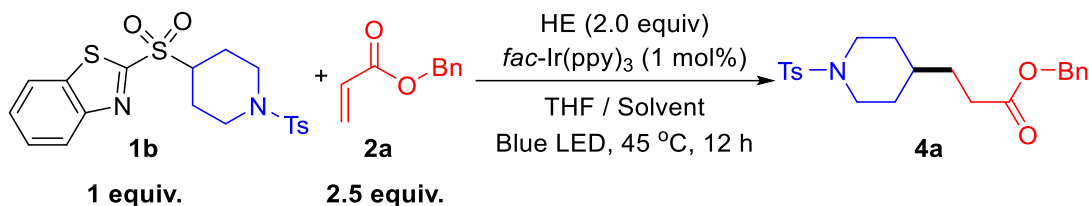

| Entry | Solvent (0.1 M) | Yield (%) <sup>[b]</sup> |
|-------|-----------------|--------------------------|
| 1     | THF             | 70%                      |
| 2     | NMP             | 30%                      |
| 3     | PhMe            | 65%                      |
| 4     | DMPU            | 45%                      |
| 5     | DMA             | 45%                      |
| 6     | DCE             | 54%                      |
| 7     | DMSO            | 40%                      |

<sup>[a]</sup>Reactions were carried out in 0.1 mmol scale. <sup>[b]</sup>Yields reported are the isolated yield.

**Table S5:** Evaluation of equivalency<sup>[a]</sup>

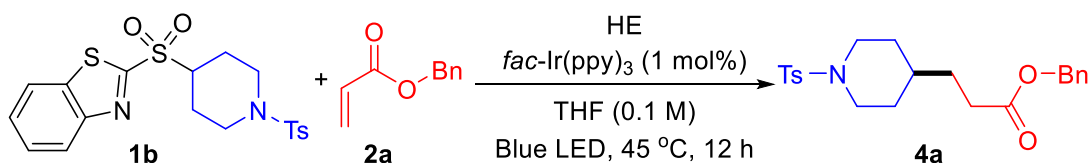

| Entry | 1a | 2a  | HE  | Yield (%) <sup>[b]</sup> |
|-------|----|-----|-----|--------------------------|
| 1     | 1  | 2.5 | 2   | 70%                      |
| 2     | 1  | 3   | 2   | 75%                      |
| 3     | 1  | 1   | 2   | 40%                      |
| 4     | 2  | 1   | 2   | 44%                      |
| 5     | 1  | 3   | 2.5 | 70%                      |

<sup>[a]</sup>Reactions were carried out in 0.1 mmol scale. <sup>[b]</sup>Yields reported are the isolated yield.

### 3.2 Cyclic voltammetry:

Cyclic voltammograms of (a) **1a**, (b) **1b**, (c) **1c**, (d) **1d**, (e) **1e**, in THF with a 0.1 M n-Bu<sub>4</sub>NPF<sub>6</sub> as a supporting electrolyte. Working electrode: Pt wire; Counter electrode: Pt wire; Reference electrode: Ag/AgCl; Scan rate: 0.05 V/s Ferrocene/ferrocenium ion redox couple was used as an external reference.

**Table S6:** *Reduction potential*

|                                                                                   |                                                                                   |                                                                                   |                                                                                   |                                                                                     |                                                                                     |
|-----------------------------------------------------------------------------------|-----------------------------------------------------------------------------------|-----------------------------------------------------------------------------------|-----------------------------------------------------------------------------------|-------------------------------------------------------------------------------------|-------------------------------------------------------------------------------------|
| 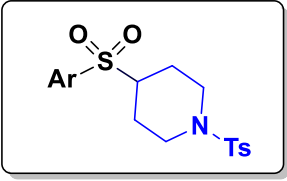 |                                                                                   |                                                                                   |                                                                                   |                                                                                     |                                                                                     |
| Ar: ≡                                                                             |  |  |  |  |  |
|                                                                                   | <b>1a</b>                                                                         | <b>1b</b>                                                                         | <b>1c</b>                                                                         | <b>1d</b>                                                                           | <b>1e</b>                                                                           |
| E(V) :                                                                            | -1.715                                                                            | -1.441                                                                            | -1.762                                                                            | -2.549                                                                              | -1.515                                                                              |
| (V vs Fc/Fc <sup>+</sup> )                                                        |                                                                                   |                                                                                   |                                                                                   |                                                                                     |                                                                                     |

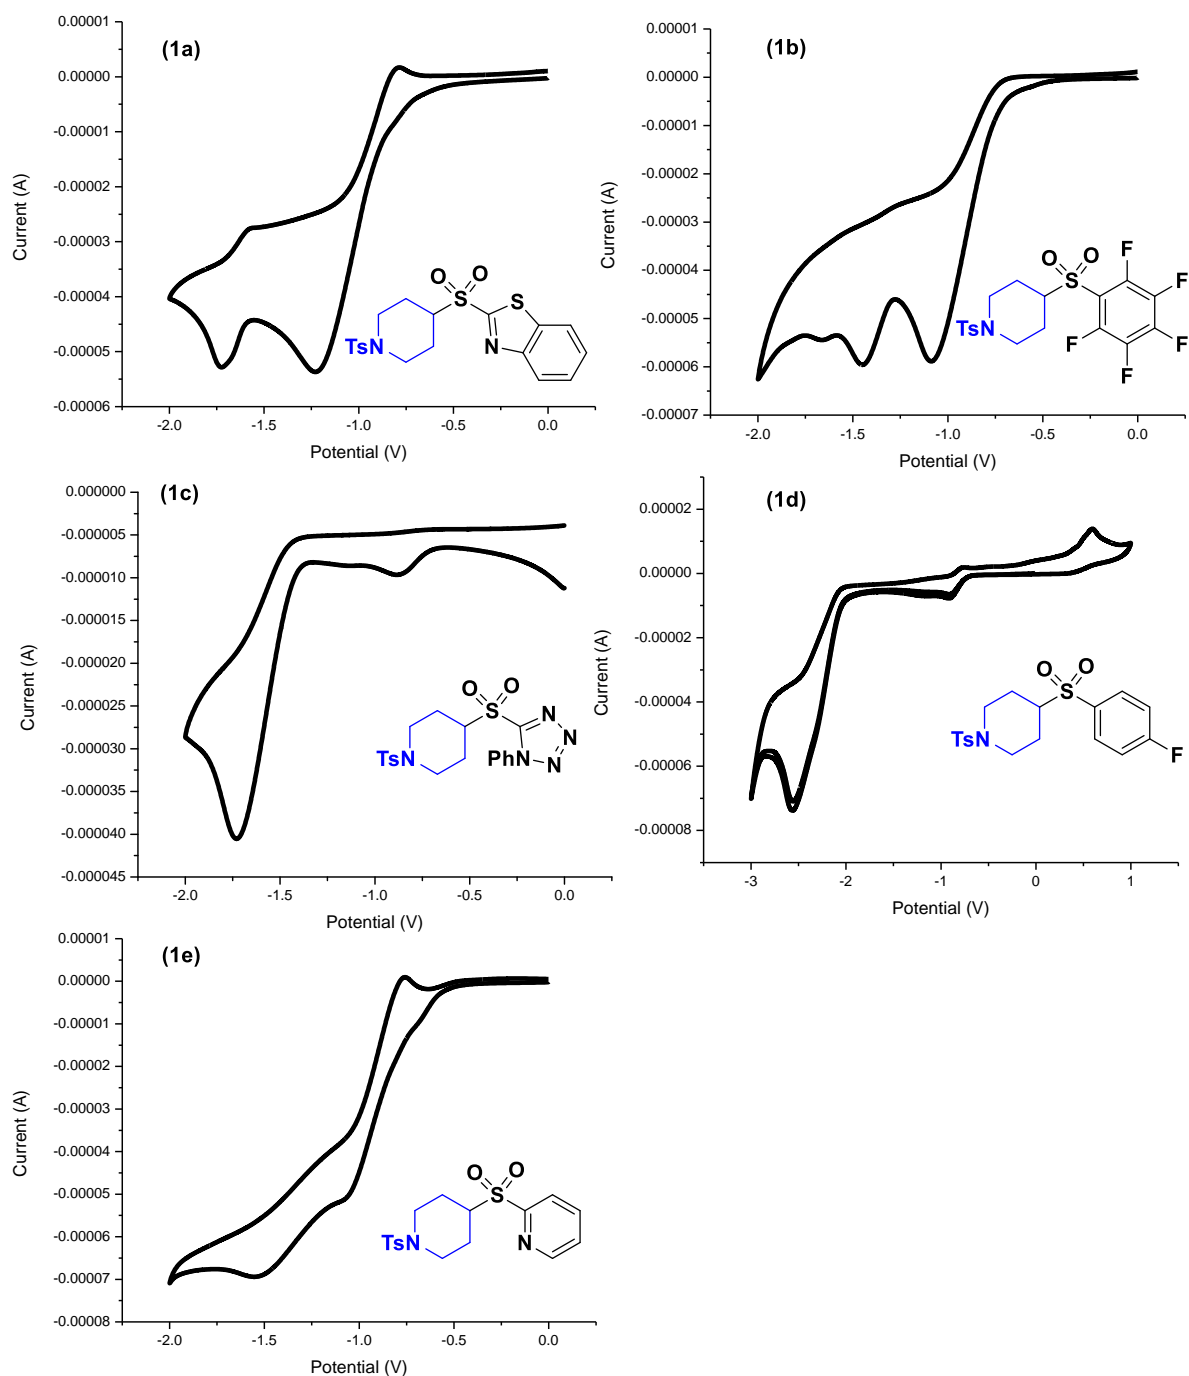

#### 4. General Procedures:

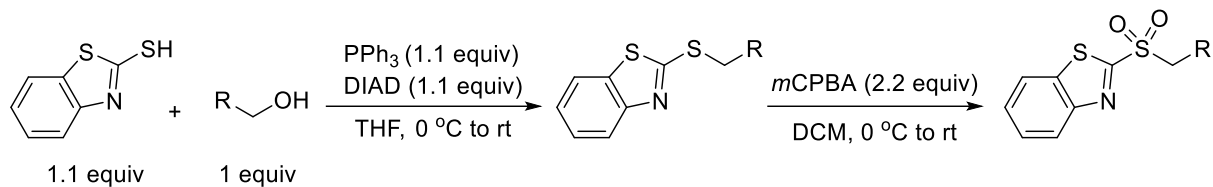

##### 4.1 General Procedure 1: Mitsunobu reaction of thiol with alkyl alcohols (GP-1)

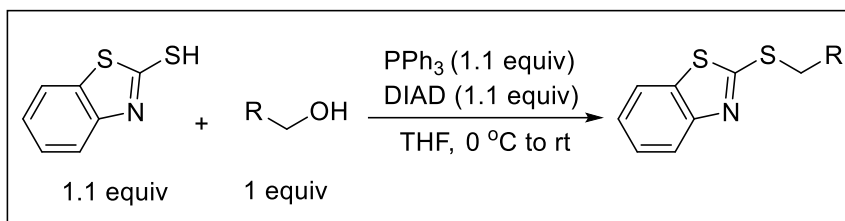

According to previous literature,<sup>[S1]</sup> a round bottom flask was charged with alcohol (1.0 equiv.), triphenyl phosphine (1.1 equiv.) and thiol (1.1 equiv.). The flask was evacuated and backfilled or continuously purged with argon. Anhydrous THF (0.2 M) was added, and the mixture was cooled to 0 °C in an ice/water bath. DIAD (neat, 1.1 equiv.) was added dropwise, and the reaction mixture was allowed to warm to room temperature and stir overnight. The mixture was concentrated and purified by column chromatography to afford pure thioether.

#### 4.2 General Procedure 2: Oxidation with *m*CPBA (GP-2)

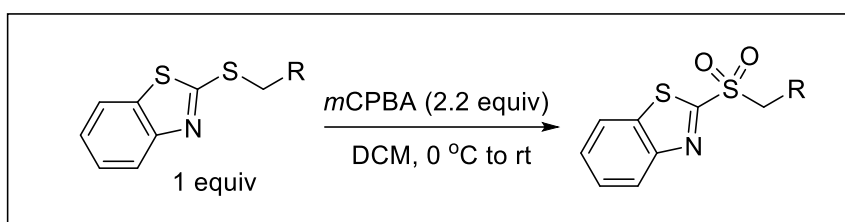

According to previous literature,<sup>[S1]</sup> to a solution of thioether (1.0 equiv.) in CH<sub>2</sub>Cl<sub>2</sub> (0.2 M) at 0 °C in an ice / water bath was added *m*CPBA (2.2 equiv.) portionwise, and the mixture was stirred until complete conversion to the sulfone was observed by TLC (the mixture was allowed to warm to room temperature). Saturated aq. NaHCO<sub>3</sub> solution and saturated aq. Na<sub>2</sub>S<sub>2</sub>O<sub>3</sub> solution were added slowly, and the mixture was stirred for 10 min. The aqueous layer was extracted with CH<sub>2</sub>Cl<sub>2</sub>, and the organic layers were dried over MgSO<sub>4</sub>. The solvent was removed under reduced pressure, and the resulting crude material was purified by recrystallization (typically from CH<sub>2</sub>Cl<sub>2</sub> / MeOH) or column chromatography (silica) to afford pure sulfone.

#### 4.3 General Procedure 3: Preparation of tertiary sulfones from primary sulfones (GP-3).

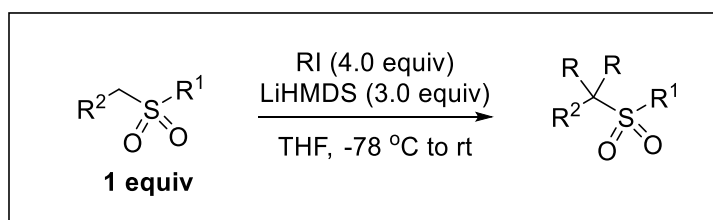

According to previous literature,<sup>[S1-S2]</sup> A two-neck Schlenk flask containing a magnetic stirring bar was flame-dried under vacuum and filled with argon after cooling to room temperature. To the flask were added primary sulfone (1 equiv) and dry THF (5 mL per mmol of sulfone). A solution of LiHMDS (1.3 M in THF, 3 equiv) was added drop wise to the reaction mixture at -78 °C under argon. After stirring for 30 min, alkyl iodide (4 equiv) was added, the mixture was stirred at rt for 16 h. Sat. NH<sub>4</sub>Cl aq was added to the reaction mixture, and the layers were separated. The aqueous layer was extracted with EtOAc (3 times), and the combined organic layer was washed with sat. NaHCO<sub>3</sub> aq and brine. The organic layer was dried over Na<sub>2</sub>SO<sub>4</sub>, filtered and the solvent was evaporated under reduced pressure. The crude product was purified by column chromatography to afford the corresponding tertiary sulfone.



**4.4 General Procedure 4:** Preparation of tertiary sulfones from secondary sulfones (GP-4).

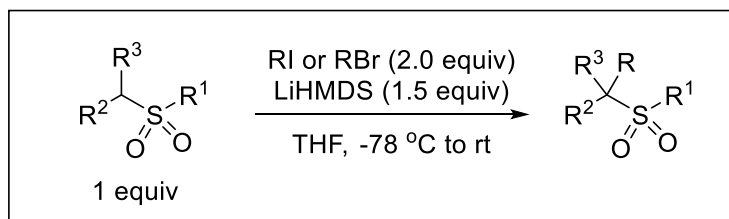

According to previous literature,<sup>[S2]</sup> A two-neck flask containing a magnetic stirring bar was flame-dried under vacuum and filled with argon after cooling to room temperature. To the flask were added primary sulfone (1 equiv) and dry THF (5 mL per mmol of sulfone). A solution of LiHMDS (1.3 M in THF, 1.5 equiv) was added drop wise to the reaction mixture at -78 °C under argon. After stirring for 30 min, alkyl bromide or iodide (2 equiv) was added, the mixture was stirred at rt for 16 h. Sat. NH<sub>4</sub>Cl aq was added to the reaction mixture, and the layers were separated. The aqueous layer was extracted with EtOAc (3 times), and the combined organic layer was washed with sat. NaHCO<sub>3</sub> aq and brine. The organic layer was dried over Na<sub>2</sub>SO<sub>4</sub>, filtered and the solvent was evaporated under reduced pressure. The crude product was purified by column chromatography to afford the corresponding tertiary sulfone.

**4.5 General Procedure 5:** Preparation of compound **2l** and **2m** for Intramolecular Giese reaction (GP-5).

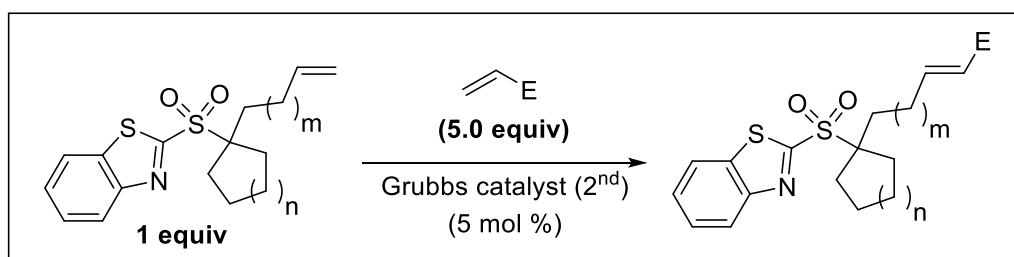

According to previous literature,<sup>[S2]</sup> A 20-mL two-neck flask containing a magnetic stirring bar was flame-dried under vacuum and filled with argon after cooling to room temperature. To this flask were added sulfone (1.0 equiv), DCM (7.5 mL per mmol), olefin (5 equiv), and Grubbs catalyst 2<sup>nd</sup> generation (5 mol %) under a stream of argon. This mixture was heated at 40 °C for 12 h. After cooling to room temperature, the mixture was passed through a pad of silica gel with copious washings with EtOAc (~10 mL). The filtrate was concentrated under reduced pressure. The crude product was purified by column chromatography to afford the corresponding sulfone.

**4.6 General Procedure 6:** Photocatalytic Desulfonative Cross-Coupling Reaction (GP-6).

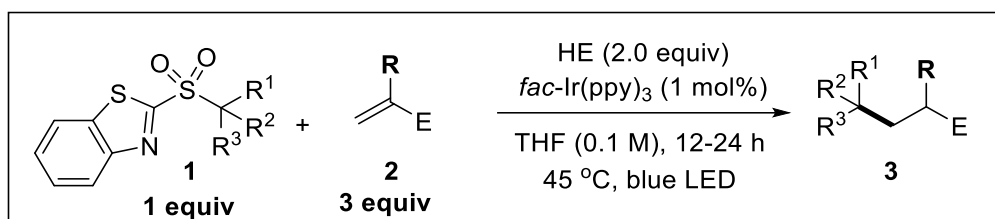

Sulfone benzothiazole **1** (0.2 mmol, 1.0 equiv), {*fac*-Ir(ppy)<sub>3</sub>} (0.002 mmol, 1 mol%), diethyl 2,6-dimethyl-1,4-dihydropyridine-3,5-dicarboxylate (**HE**) (0.4 mmol, 2.0 equiv) and acceptor **2** (0.6 mmol, 3.0 equiv) was charged in an oven-dried 5 mL glass vial under argon atmosphere

in glove box. The reaction mixture was dissolved in 0.1 M dry THF and the vial was sealed with a Teflon cap and wrapped with parafilm in glove box. The resulting mixture was stirred under the irradiation of 2x24W Blue LEDs for 12-24 h at 45 °C (oil bath temperature). Upon completion the mixture was transferred to a round bottom flask and the glass vial was washed with CH<sub>2</sub>Cl<sub>2</sub> (2 × 2 mL). The crude mixture was concentrated and purified via flash column chromatography or purified by pTLC to afford the corresponding Coupling product.

#### 4.7 General Procedure 7: Intramolecular Giese reaction of tertiary sulfone (GP-7).

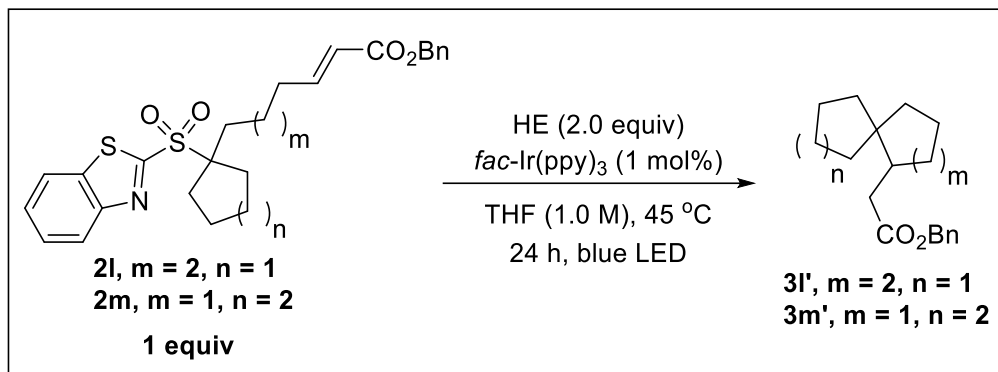

Sulfone benzothiazole **2l**, **2m** (0.1 mmol, 1.0 equiv), {*fac*-Ir(ppy)<sub>3</sub>} (0.001 mmol, 1 mol%), diethyl 2,6-dimethyl-1,4-dihydropyridine-3,5-dicarboxylate (**HE**) (0.2 mmol, 2.0 equiv) was charged in an oven-dried 5 mL glass vial under argon atmosphere in glove box. The reaction mixture was dissolved in 0.1 M dry THF and the vial was sealed with a Teflon cap and wrapped with parafilm in glove box. The resulting mixture was stirred under the irradiation of 2x24W Blue LEDs for 24 h at 45 °C (oil bath temperature). Upon completion the mixture was transferred to a round bottom flask and the glass vial was washed with CH<sub>2</sub>Cl<sub>2</sub> (2 × 2 mL). The crude mixture was concentrated and purified via flash column chromatography or purified by pTLC to afford the corresponding Coupling product.

#### 4.8 General Procedure 8: Photocatalytic Desulfonative Coupling with allyl sulfone (GP-8).

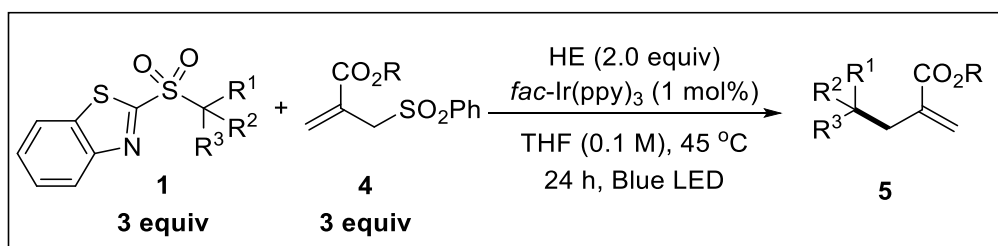

Sulfone benzothiazole (0.2 mmol, 1.0 eq.), {*fac*-Ir(ppy)<sub>3</sub>} (0.002 mmol, 1 mol%), diethyl 2,6-dimethyl-1,4-dihydropyridine-3,5-dicarboxylate (**HE**) (0.4 mmol, 2.0 eq.) and acceptor (0.6 mmol, 3.0 eq.) was charged in an oven-dried 5 mL glass vial under argon atmosphere in glove box. The reaction mixture was dissolved in 0.1 M dry THF and the vial was sealed with a Teflon cap and wrapped with parafilm in glove box. The resulting mixture was stirred under the irradiation of 2x24W Blue LEDs for 24 h at 45 °C (oil bath temperature). Upon completion the mixture was transferred to a round bottom flask and the glass vial was washed with CH<sub>2</sub>Cl<sub>2</sub> (2 × 2 mL). The crude mixture was concentrated and purified via flash column chromatography or purified by pTLC to afford the corresponding Coupling product.

## 5. Mechanistic study and proposal

### 5.1 Using TEMPO as radical scavenger

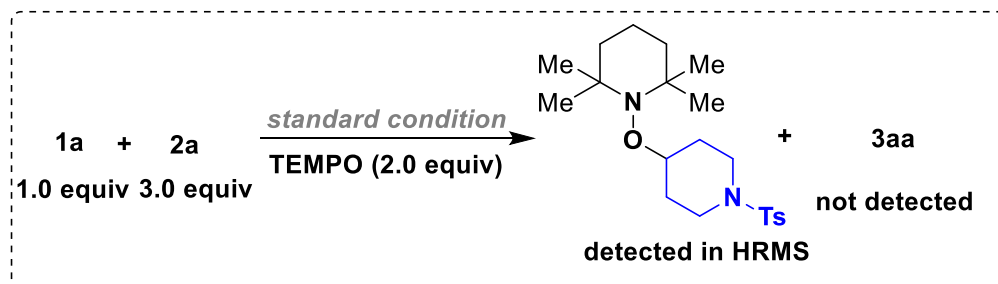

To an oven-dried 5 mL glass vial was charged with **1a** (87.0 mg, 0.2 mmol, 1.0 equiv), **2a** (97.0 mg, 0.6 mmol, 3.0 equiv), **TEMPO** (63.0 mg, 0.4 mmol, 2.0 equiv) **HE** (101.0 mg, 0.4 mmol, 2.0 equiv) and [*fac*-Ir(ppy)<sub>3</sub>] (1.3 mg, 0.002 mmol, 1 mol%) under argon atmosphere in glove box. The reaction mixture was dissolved in 0.1 M dry THF and the vial was sealed with a Teflon cap and wrapped with parafilm in glove box. The resulting mixture was stirred under the irradiation of 2x24W Blue LEDs for 12 h at 45 °C (oil bath temperature). The corresponding coupling product **3aa** was not observed based on <sup>1</sup>H NMR analysis, and the corresponding product of radical trapping, 2,2,6,6-tetramethyl-1-((1-tosylpiperidin-4-yl)oxy)piperidine was observed by mass spectrometry (HRMS)

#### Elemental Composition Report

##### Single Mass Analysis

Tolerance = 10.0 PPM / DBE: min = -1.5, max = 50.0  
Element prediction: Off

Monoisotopic Mass, Even Electron Ions

286 formula(e) evaluated with 2 results within limits (all results (up to 1000) for each mass)

Elements Used:

C: 0-60 H: 0-100 N: 0-4 O: 0-5 S: 0-3

Sample Name : 300621\_SP-315

Test Name :

300621\_SP-315 8 (0.163)

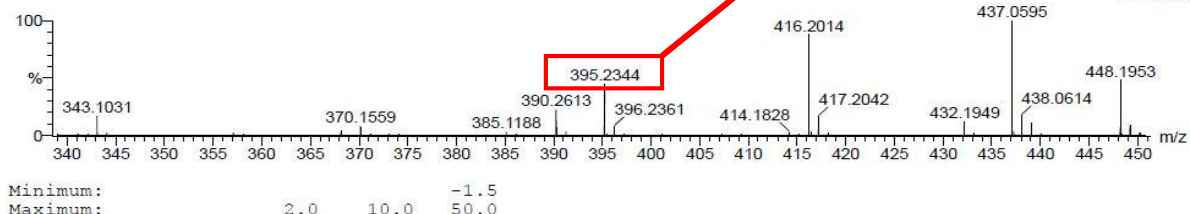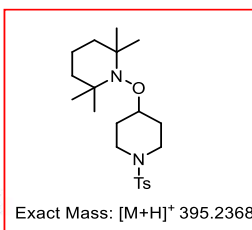

Exact Mass: [M+H]<sup>+</sup> 395.2368

Page 1

### 5.2 Fluorescence quenching experiments (Stern-Volmer study)

Emission intensities were recorded using a Perkin Elmer LS55 fluorescence spectrophotometer. In a typical experiment, a 0.5 mM solution of {*fac*-Ir(ppy)<sub>3</sub>} (PC) in THF was added to the appropriate amount of quencher in a PTEF capped 1.0 cm quartz cuvette. After degassing by bubbling a stream of nitrogen for 10 minutes, the emission of the sample was collected. All solutions were excited at  $\lambda = 450$  nm (absorption maximum of the photocatalyst) and the emission intensity was collected at 546 nm (emission maximum).<sup>[S5]</sup>



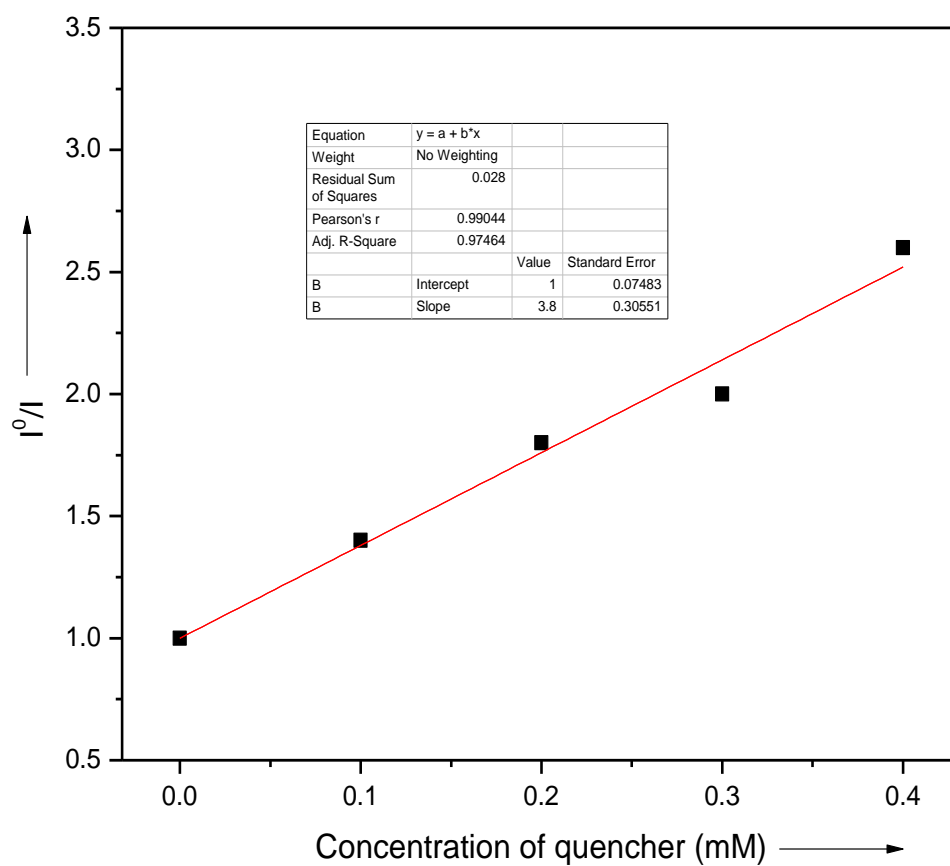

**Figure S2b:** Stern-Volmer plot of PC with **1a**

### Hantzsch ester (HE) as a Quencher

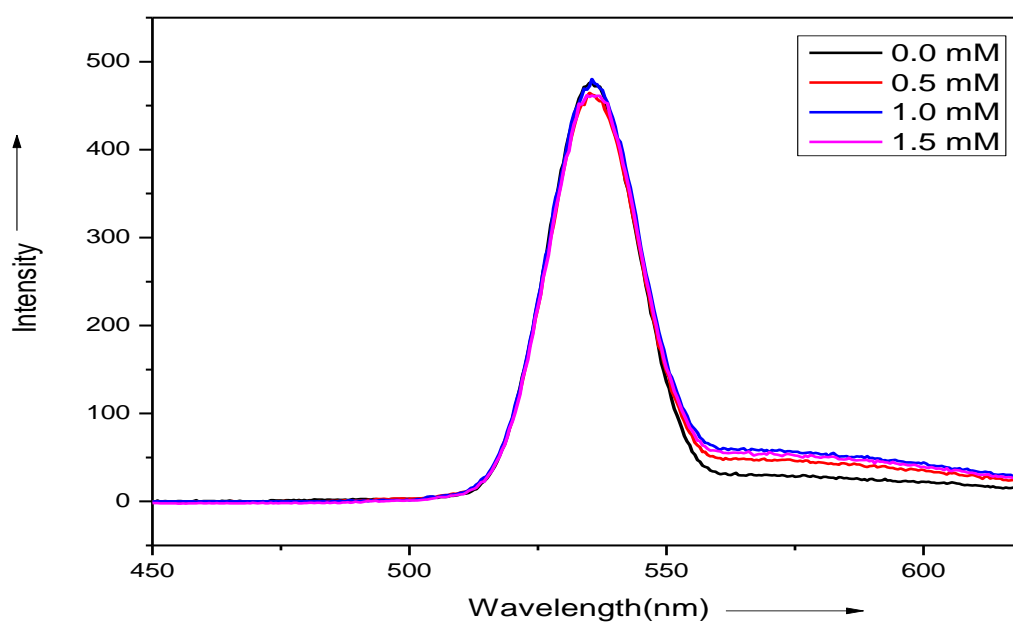

**Figure S2c:** Fluorescence quenching of PC with HE

## Stern Volmer plot

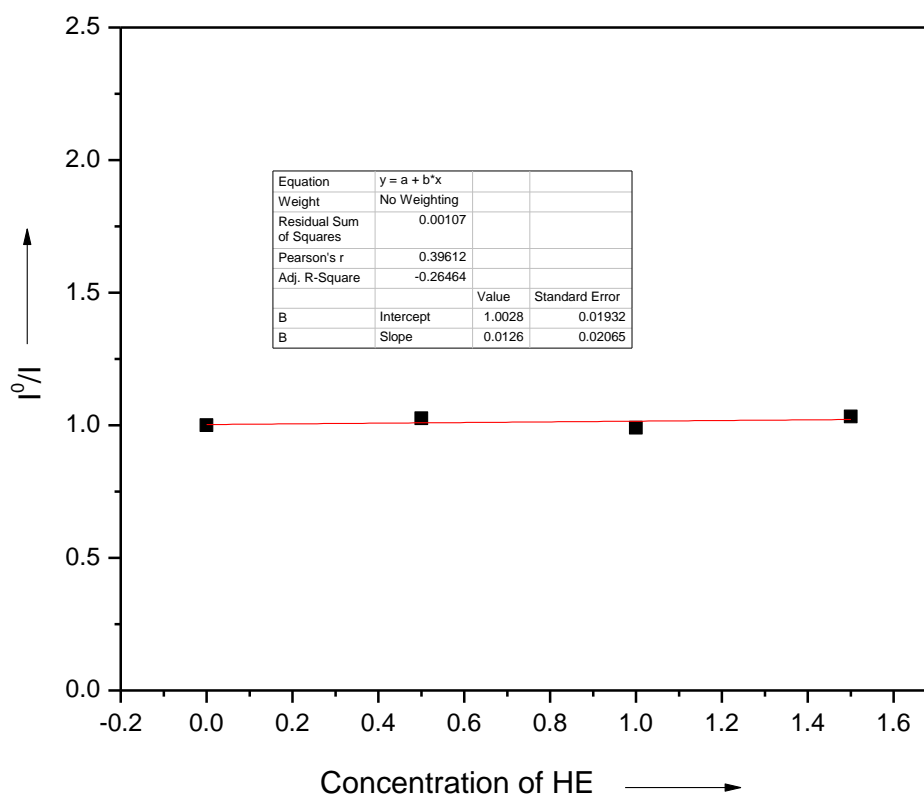

**Figure S2d:** Stern-Volmer plot of PC with HE

## 6.0 References:

- S1. R. R. Merchant, J. T. Edwards, T. Qin, M. M. Kruszyk, C. Bi, G. Che, D. H. Bao, W. Qiao, L. Sun, M. R. Collins, O. O. Fadeyi, G. M. Gallego, J. J. Mousseau, P. Nuhant and P. S. Baran, *Science*, 2018, **360**, 75.
- S2. M. Nambo, Y. Tahara, J. C.-H. Yim, D. Yokogawa and C. M. Crudden, *Chem. Sci.*, 2021, **12**, 4866.
- S3. M. M. Zhang and F. Liu, *Org. Chem. Front.*, 2018, **5**, 3443.
- S4. S. T.-C. Eey and M. J. Lear, *Org. Lett.*, 2010, **12**, 5510.
- S5. J. L. Jeffrey, F. R. Petronijevic' and D. W. C. MacMillan, *J. Am. Chem. Soc.*, 2015, **137**, 8404.

## 7.0 Experimental Details for the Synthesized Starting Materials Sulfones

### 7.1. 2-((2-cyclohexylpropan-2-yl)sulfonyl)benzo[d]thiazole (1f)

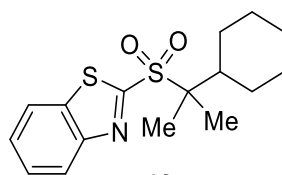

**1f**

$C_{16}H_{21}NO_2S_2$

M. W. 323.1014 g/mol

Following General Procedure **GP1**, **GP2**, **GP3**, to afford the title compound **1f**, white solid.

**HRMS (ESI):**  $m/z$   $[M+H]^+$  Calculated for  $[C_{16}H_{22}NO_2S_2]^+$ : 324.1092; Found: 324.1102.

**$^1H$  NMR (400 MHz,  $CDCl_3$ )**  $\delta$  8.26–8.24 (m, 1H), 8.02–7.99 (m, 1H), 7.65–7.56 (m, 2H), 2.10–2.06 (m, 2H), 2.03–1.97 (m, 1H), 1.83–1.78 (m, 2H), 1.47 (s, 6H), 1.30–1.12 (m, 6H).  **$^{13}C$  NMR (101 MHz,  $CDCl_3$ )**  $\delta$  165.4, 153.2, 137.4, 128.0, 127.6, 125.8, 122.2, 69.5, 42.3, 28.4, 26.8, 26.2, 20.1.

### 7.2. 2-((2-methyl-4-phenylbutan-2-yl)sulfonyl)benzo[d]thiazole (1g)

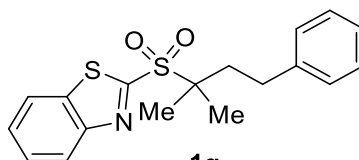

**1g**

$C_{18}H_{19}NO_2S_2$

M. W. 345.0857 g/mol

Following General Procedure **GP1**, **GP2**, **GP3**, to afford the title compound **1g**, white solid.

**HRMS (ESI):**  $m/z$   $[M+H]^+$  Calculated for  $[C_{18}H_{20}NO_2S_2]^+$ : 346.0935; Found: 346.0945.

**$^1H$  NMR (400 MHz,  $CDCl_3$ )**  $\delta$  8.27–8.25 (m, 1H), 8.03–8.00 (m, 1H), 7.66–7.58 (m, 2H), 7.30–7.26 (m, 2H), 7.22–7.18 (m, 3H), 2.79–2.75 (m, 2H), 2.22–2.17 (m, 2H), 1.60 (s, 6H).  **$^{13}C$  NMR (101 MHz,  $CDCl_3$ )**  $\delta$  164.1, 153.3, 141.0, 137.4, 128.7, 128.5, 128.1, 127.7, 126.4, 125.8, 122.3, 65.3, 37.4, 30.4, 21.2.

### 7.3. 2-((2-methylhexan-2-yl)sulfonyl)benzo[d]thiazole (1h)

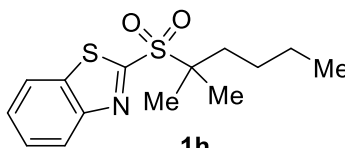

**1h**

$C_{14}H_{19}NO_2S_2$

M. W. 297.0857 g/mol

Following General Procedure **GP1**, **GP2**, **GP3**, to afford the title compound **1h**, white solid.

**HRMS (ESI):**  $m/z$   $[M+H]^+$  Calculated for  $[C_{14}H_{20}NO_2S_2]^+$ : 298.0935; Found: 298.0934.

**$^1H$  NMR (400 MHz,  $CDCl_3$ )**  $\delta$  8.26–8.24 (m, 1H), 8.02–8.00 (m, 1H), 7.65–7.56 (m, 2H), 1.90–1.86 (m, 2H), 1.49 (s, 6H), 1.39–1.29 (m, 4H), 0.90–0.88 (m, 3H).  **$^{13}C$  NMR (101 MHz,  $CDCl_3$ )**  $\delta$  164.2, 153.2, 137.4, 128.0, 127.6, 125.8, 122.2, 65.5, 34.7, 25.9, 23.2, 20.8, 14.1.

### 7.4. 2-((1-methylcyclopentyl)sulfonyl)benzo[d]thiazole (1i)

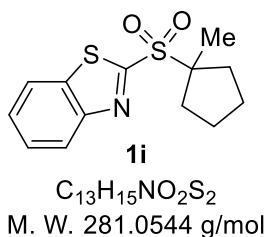

Following General Procedure **GP1**, **GP2**, **GP4**, to afford the title compound **1i**, white solid.

**HRMS (ESI):**  $m/z$   $[M+H]^+$  Calculated for  $[C_{13}H_{16}NO_2S_2]^+$ : 282.0622; Found: 282.0628.

**$^1H$  NMR (400 MHz,  $CDCl_3$ )**  $\delta$  8.26–8.23 (m, 1H), 8.02–8.00 (m, 1H), 7.65–7.57 (m, 2H), 2.71–2.64 (m, 2H), 1.88–1.80 (m, 2H), 1.79–1.72 (m, 2H), 1.70–1.63 (m, 2H), 1.56 (s, 3H).  **$^{13}C$  NMR (101 MHz,  $CDCl_3$ )**  $\delta$  164.8, 153.2, 137.3, 128.0, 127.6, 125.7, 122.2, 70.7, 35.3, 25.9, 23.8.

#### 7.5. 2-((difluoro(phenyl)methyl)sulfonyl)benzo[d]thiazole (**1j**)

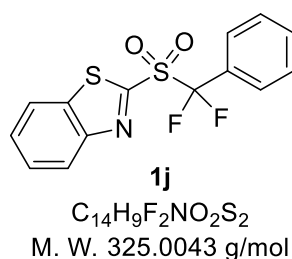

Following General Procedure **GP1**, **GP2**, **GP3**, to afford the title compound **1j**, white solid.

**HRMS (ESI):**  $m/z$   $[M+H]^+$  Calculated for  $[C_{14}H_{10}F_2NO_2S_2]^+$ : 326.0121; Found: 326.0135.

**$^1H$  NMR (400 MHz,  $CDCl_3$ )**  $\delta$  8.38–8.36 (m, 1H), 8.07–8.05 (m, 1H), 7.77–7.75 (m, 2H), 7.72–7.63 (m, 3H), 7.57–7.53 (m, 2H).  **$^{13}C$  NMR (101 MHz,  $CDCl_3$ )**  $\delta$  159.3, 153.1, 138.39, 133.12, 129.0, 128.9, 128.2, 128.1 (d,  $J = 2.4$  Hz), 128.1, 126.4, 122.6 (t,  $J = 259.2$  Hz), 122.3.  **$^{19}F$  NMR (376 MHz,  $CDCl_3$ )**  $\delta$  -99.65.

#### 7.6. 2-(isopropylsulfonyl)benzo[d]thiazole (**1k**)

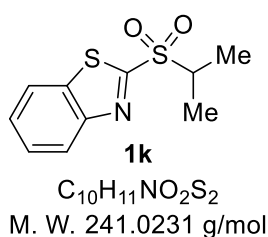

Following General Procedure **GP1**, **GP2**, to afford the title compound **1k**, white solid.

**HRMS (ESI):**  $m/z$   $[M+H]^+$  Calculated for  $[C_{10}H_{12}NO_2S_2]^+$ : 242.0309; found 242.0301.

**$^1H$  NMR (400 MHz,  $CDCl_3$ )**  $\delta$  8.25–8.22 (m, 1H), 8.03–8.01 (m, 1H), 7.66–7.58 (m, 2H), 3.78–3.71 (m, 1H), 1.47 (d,  $J = 6.9$  Hz, 6H).  **$^{13}C$  NMR (101 MHz,  $CDCl_3$ )**  $\delta$  164.8, 153.0, 137.0, 128.1, 127.7, 125.6, 122.4, 55.5, 15.5.

#### 7.7. 2-((1-phenylpropan-2-yl)sulfonyl)benzo[d]thiazole (**1l**)



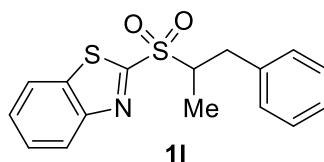

**1l**

$C_{16}H_{15}NO_2S_2$

M. W. 317.0544 g/mol

Following General Procedure **GP1**, **GP2**, to afford the title compound **1l**, white solid.

**HRMS (ESI):**  $m/z$   $[M+H]^+$  Calculated for  $[C_{16}H_{16}NO_2S_2]^+$ : 318.0622; Found: 318.0560.

**$^1H$  NMR (400 MHz,  $CDCl_3$ )**  $\delta$  8.26–8.23 (m, 1H), 8.03–8.01 (m, 1H), 7.69–7.56 (m, 2H), 7.32–7.19 (m, 3H), 7.17–7.13 (m, 2H), 3.90–3.84 (m, 1H), 3.56–3.52 (m, 1H), 2.80–2.74 (m, 1H), 1.34 (d,  $J = 6.9$  Hz, 3H).  **$^{13}C$  NMR (101 MHz,  $CDCl_3$ )**  $\delta$  165.0, 153.0, 137.0, 136.4, 129.3, 128.9, 128.2, 127.8, 127.2, 125.6, 122.4, 61.2, 35.2, 12.5.

#### 7.8. 2-(cyclopentylsulfonyl)benzo[d]thiazole (**1m**)

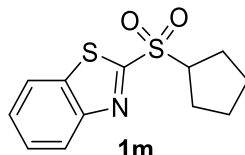

**1m**

$C_{12}H_{13}NO_2S_2$

M. W. 267.0388 g/mol

Following General Procedure **GP1**, **GP2**, to afford the title compound **1m**, white solid.

**HRMS (ESI):**  $m/z$   $[M+H]^+$  Calculated for  $[C_{12}H_{14}NO_2S_2]^+$ : 268.0466; Found: 268.0455.

**$^1H$  NMR (400 MHz,  $CDCl_3$ )**  $\delta$  8.23–8.20 (m, 1H), 8.02–8.00 (m, 1H), 7.65–7.57 (m, 2H), 4.04–4.00 (m, 1H), 2.30–2.21 (m, 2H), 2.09–1.97 (m, 2H), 1.88–1.76 (m, 2H), 1.74–1.61 (m, 2H).  **$^{13}C$  NMR (101 MHz,  $CDCl_3$ )**  $\delta$  166.0, 153.0, 136.9, 128.0, 127.7, 125.6, 122.4, 63.4, 27.2, 26.1.

#### 7.9. 2-(cyclohexylsulfonyl)benzo[d]thiazole (**1n**)

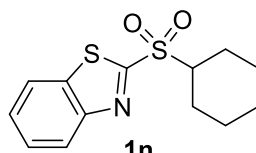

**1n**

$C_{13}H_{15}NO_2S_2$

M. W. 281.0544 g/mol

Following General Procedure **GP1**, **GP2**, to afford the title compound **1n**, white solid.

**HRMS (ESI):**  $m/z$   $[M+H]^+$  Calculated for  $[C_{13}H_{16}NO_2S_2]^+$ : 282.0622; Found: 282.0616.

**$^1H$  NMR (400 MHz,  $CDCl_3$ )**  $\delta$  8.25–8.23 (m, 1H), 8.03–8.01 (m, 1H), 7.67–7.57 (m, 2H), 3.51–3.44 (m, 1H), 2.21–2.16 (m, 2H), 1.95–1.88 (m, 2H), 1.73–1.68 (m, 1H), 1.66–1.62 (m, 1H), 1.36–1.16 (m, 4H).  **$^{13}C$  NMR (101 MHz,  $CDCl_3$ )**  $\delta$  165.2, 153.1, 137.1, 128.0, 127.7, 125.7, 122.4, 63.2, 25.2, 25.1, 25.1.

#### 7.10. 2-(pentylsulfonyl)benzo[d]thiazole (**1o**)

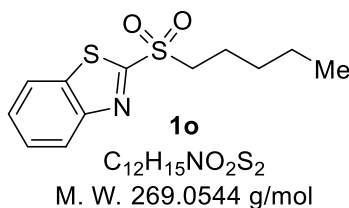

Following General Procedure **GP1**, **GP2**, to afford the title compound **1o**, white solid.

**HRMS (ESI):**  $m/z$   $[M+H]^+$  Calculated for  $[C_{12}H_{16}NO_2S_2]^+$ : 270.0622; Found: 270.0628.

**$^1H$  NMR (400 MHz,  $CDCl_3$ )**  $\delta$  8.22–8.20 (m, 1H), 8.02–8.00 (m, 1H), 7.66–7.57 (m, 2H), 3.52–3.48 (m, 2H), 1.91–1.83 (m, 2H), 1.45–1.27 (m, 4H), 0.90 (t,  $J$  = 7.3 Hz, 3H).  **$^{13}C$  NMR (101 MHz,  $CDCl_3$ )**  $\delta$  166.0, 152.8, 136.9, 128.1, 127.8, 125.6, 122.5, 54.8, 30.4, 22.1, 22.0, 13.8.

#### 7.11. 2-(butylsulfonyl)benzo[d]thiazole (**1p**)

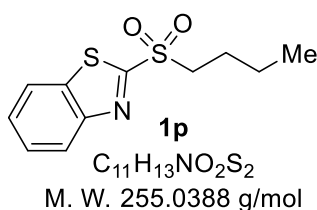

Following General Procedure **GP1**, **GP2**, to afford the title compound **1p**, white solid.

**HRMS (ESI):**  $m/z$   $[M+H]^+$  Calculated for  $[C_{11}H_{14}NO_2S_2]^+$ : 256.0466; Found: 256.0471.

**$^1H$  NMR (400 MHz,  $CDCl_3$ )**  $\delta$  8.23–8.21 (m, 1H), 8.03–8.01 (m, 1H), 7.66–7.57 (m, 2H), 3.53–3.49 (m, 2H), 1.90–1.82 (m, 2H), 1.52–1.43 (m, 2H), 0.93 (t,  $J$  = 7.3 Hz, 3H).  **$^{13}C$  NMR (101 MHz,  $CDCl_3$ )**  $\delta$  166.0, 152.9, 136.9, 128.1, 127.8, 125.6, 122.5, 54.6, 24.3, 21.7, 13.6.

#### 7.12. 2-(phenethylsulfonyl)benzo[d]thiazole (**1q**)

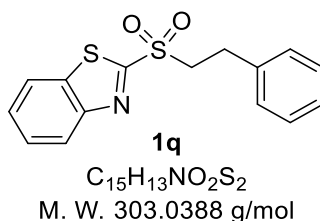

Following General Procedure **GP1**, **GP2**, to afford the title compound **1q**, white solid.

**HRMS (ESI):**  $m/z$   $[M+H]^+$  Calculated for  $[C_{15}H_{14}NO_2S_2]^+$ : 304.0466; Found: 304.0472.

**$^1H$  NMR (400 MHz,  $CDCl_3$ )**  $\delta$  8.25–8.22 (m, 1H), 8.05–8.03 (m, 1H), 7.69–7.61 (m, 2H), 7.30–7.26 (m, 2H), 7.23–7.19 (m, 3H), 3.85–3.81 (m, 2H), 3.26–3.21 (m, 2H).  **$^{13}C$  NMR (101 MHz,  $CDCl_3$ )**  $\delta$  165.7, 152.8, 137.0, 136.9, 128.9, 128.5, 128.2, 127.8, 127.2, 125.6, 122.5, 56.0, 28.5.

#### 7.13. 2-((cyclohexylmethyl)sulfonyl)benzo[d]thiazole (**1r**)

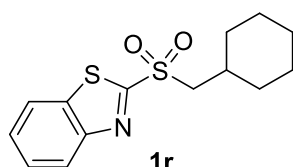

**1r**

$C_{14}H_{17}NO_2S_2$

M. W. 295.0701 g/mol

Following General Procedure **GP1**, **GP2**, to afford the title compound **1r**, white solid.

**HRMS (ESI):**  $m/z$   $[M+H]^+$  Calculated for  $[C_{14}H_{18}NO_2S_2]^+$ : 296.0779; Found: 296.0781.

**$^1H$  NMR (400 MHz,  $CDCl_3$ )**  $\delta$  8.18–8.16 (m, 1H), 7.99–7.96 (m, 1H), 7.62–7.53 (m, 2H), 3.41–3.40 (m, 2H), 2.18–2.07 (m, 1H), 1.92–1.88 (m, 2H), 1.69–1.56 (m, 3H), 1.31–1.20 (m, 2H), 1.17–1.05 (m, 3H).  **$^{13}C$  NMR (101 MHz,  $CDCl_3$ )**  $\delta$  166.7, 152.6, 136.6, 128.0, 127.6, 125.3, 122.4, 60.9, 32.9, 32.6, 25.6, 25.6.

#### 7.14. 2-((3-bromopropyl)sulfonyl)benzo[d]thiazole (**1s**)

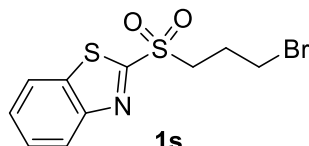

**1s**

$C_{10}H_{10}BrNO_2S_2$

M. W. 318.9336 g/mol

Following General Procedure **GP1**, **GP2**, to afford the title compound **1s**, white solid.

**HRMS (ESI):**  $m/z$   $[M+H]^+$  Calculated for  $[C_{10}H_{11}BrNO_2S_2]^+$ : 319.9415; Found: 319.9429.

**$^1H$  NMR (400 MHz,  $CDCl_3$ )**  $\delta$  8.23–8.21 (m, 1H), 8.04–8.01 (m, 1H), 7.76–7.59 (m, 2H), 3.72–3.68 (m, 2H), 3.55–3.52 (m, 2H), 2.51–2.44 (m, 2H).  **$^{13}C$  NMR (101 MHz,  $CDCl_3$ )**  $\delta$  165.4, 152.7, 136.8, 128.3, 127.9, 125.6, 122.5, 53.4, 30.6, 25.7.

#### 7.15. 2-((4-chlorobutyl)sulfonyl)benzo[d]thiazole (**1t**)

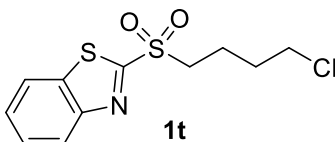

**1t**

$C_{11}H_{12}ClNO_2S_2$

M. W. 288.9998 g/mol

Following General Procedure **GP1**, **GP2**, to afford the title compound **1t**, white solid.

**HRMS (ESI):**  $m/z$   $[M+H]^+$  Calculated for  $[C_{11}H_{13}ClNO_2S_2]^+$ : 290.0076; Found: 290.0084.

**$^1H$  NMR (400 MHz,  $CDCl_3$ )**  $\delta$  8.23–8.21 (m, 1H), 8.04–8.01 (m, 1H), 7.67–7.58 (m, 2H), 3.58–3.54 (m, 4H), 2.21–2.05 (m, 2H), 2.00–1.93 (m, 2H).  **$^{13}C$  NMR (101 MHz,  $CDCl_3$ )**  $\delta$  165.6, 152.8, 136.9, 128.3, 127.9, 125.6, 122.5, 53.9, 43.8, 30.9, 20.1.

#### 7.16. 2-((2,2,2-trifluoroethyl)sulfonyl)benzo[d]thiazole (**1u**)

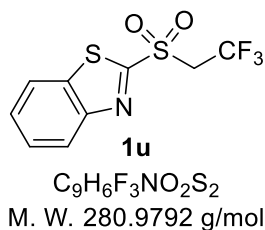

Following General Procedure **GP1**, **GP2**, to afford the title compound **1u**, white solid.

**HRMS (ESI):**  $m/z$   $[M+H]^+$  Calculated for  $[C_9H_7F_3NO_2S_2]^+$ : 281.9870; Found: 281.9878.

**$^1H$  NMR (400 MHz,  $CDCl_3$ )**  $\delta$  8.23–8.21 (m, 1H), 8.04–8.01 (m, 1H), 7.68–7.60 (m, 2H), 4.47–4.41 (m, 2H).  **$^{13}C$  NMR (101 MHz,  $CDCl_3$ )**  $\delta$  164.3, 152.4, 137.0, 128.7, 128.1, 125.7, 122.5, 121.0 (q,  $J$  = 278.4 Hz), 56.3 (q,  $J$  = 32.3 Hz).  **$^{19}F$  NMR (376 MHz,  $CDCl_3$ )**  $\delta$  -60.6.

#### 7.17. 2-(benzylsulfonyl)benzo[d]thiazole (1v)

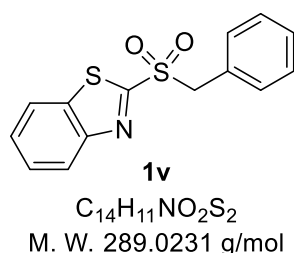

Following General Procedure **GP1**, **GP2**, to afford the title compound **1v**, white solid.

**HRMS (ESI):**  $m/z$   $[M+H]^+$  Calculated for  $[C_{14}H_{12}NO_2S_2]^+$ : 290.0309; Found: 290.0315.

**$^1H$  NMR (400 MHz,  $CDCl_3$ )**  $\delta$  8.26–8.24 (m, 1H), 7.93–7.91 (m, 1H), 7.66–7.54 (m, 2H), 7.33–7.24 (m, 5H), 4.75 (s, 2H).  **$^{13}C$  NMR (101 MHz,  $CDCl_3$ )**  $\delta$  165.2, 152.6, 137.1, 131.2, 129.3, 129.0, 128.1, 127.8, 126.4, 125.5, 122.4, 61.1.

#### 7.18. 3-(benzo[d]thiazol-2-ylsulfonyl)propyl pivalate (1w)

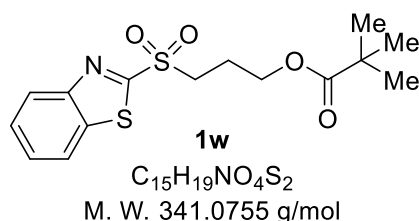

Following General Procedure **GP1**, **GP2**, to afford the title compound **1w**, white solid.

**HRMS (ESI):**  $m/z$   $[M+H]^+$  Calculated for  $[C_{15}H_{20}NO_4S_2]^+$ : 342.0834; Found: 342.0834.

**$^1H$  NMR (400 MHz,  $CDCl_3$ )**  $\delta$  8.23–8.20 (m, 1H), 8.07–7.99 (m, 1H), 7.67–7.59 (m, 2H), 4.17 (t,  $J$  = 6.1 Hz, 2H), 3.63–3.59 (m, 2H), 2.27–2.20 (m, 2H), 1.17 (s, 9H).  **$^{13}C$  NMR (101 MHz,  $CDCl_3$ )**  $\delta$  178.3, 165.5, 152.8, 136.9, 128.3, 127.9, 125.6, 122.5, 61.8, 51.8, 38.9, 27.26, 22.5.

#### 7.19. 2-((3-((tert-butyldimethylsilyl)oxy)propyl)sulfonyl)benzo[d]thiazole (1x)

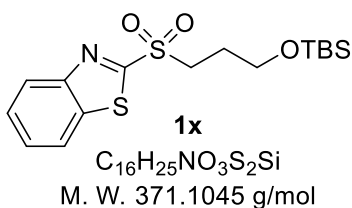

Following General Procedure **GP1**, **GP2**, to afford the title compound **1v**, white solid.

**HRMS (ESI):**  $m/z$   $[M+H]^+$  Calculated for  $[C_{16}H_{26}NO_3S_2Si]^+$ : 372.1123; Found: 372.1123.

**$^1H$  NMR (400 MHz,  $CDCl_3$ )**  $\delta$  8.23–8.21 (m, 1H), 8.03–8.01 (m, 1H), 7.66–7.58 (m, 2H), 3.71 (t,  $J$  = 5.8 Hz, 2H), 3.65–3.61 (m, 2H), 2.11–2.04 (m, 2H), 0.85 (s, 9H), 0.01 (s, 6H).  **$^{13}C$  NMR (101 MHz,  $CDCl_3$ )**  $\delta$  165.9, 152.9, 136.9, 128.2, 127.8, 125.7, 122.5, 60.7, 52.1, 26.0, 25.9, 18.3, -5.3.

**7.20. methyl (R)-4-((2R,5R,8R,9S,10S,13R,14S,17R)-2-(benzo[d]thiazol-2-ylsulfonyl)-10,13-dimethylhexadecahydro-1H-cyclopenta[a]phenanthren-17-yl)pentanoate (1y)**

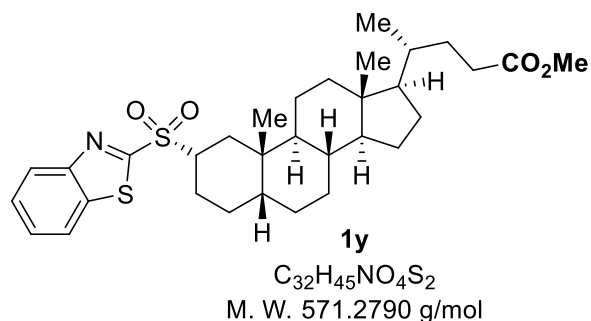

Following General Procedure **GP1**, **GP2**, to afford the title compound **1v**, white solid.

**HRMS (ESI):**  $m/z$   $[M+H]^+$  Calculated for  $[C_{32}H_{46}NO_4S_2]^+$ : 572.2868; Found: 572.2869.

**$^1H$  NMR (400 MHz,  $CDCl_3$ )**  $\delta$  8.21–8.19 (m, 1H), 8.02–8.00 (m, 1H), 7.65–7.56 (m, 2H), 3.93–3.89 (m, 1H), 3.65 (s, 3H), 2.38–2.30 (m, 1H), 2.26–2.14 (m, 3H), 2.05–2.00 (m, 1H), 1.98–1.87 (m, 3H), 1.86–1.74 (m, 4H), 1.71–1.67 (m, 1H), 1.63–1.53 (m, 2H), 1.43–1.36 (m, 3H), 1.33–1.23 (m, 7H), 1.10–1.02 (m, 3H), 1.00 (s, 3H), 0.89 (d,  $J$  = 6.4 Hz, 3H), 0.64 (s, 3H).  **$^{13}C$  NMR (101 MHz,  $CDCl_3$ )**  $\delta$  174.9, 166.5, 153.1, 137.1, 128.0, 127.7, 125.6, 122.4, 59.6, 56.7, 56.1, 51.6, 42.8, 40.5, 40.2, 37.3, 35.6, 35.5, 34.6, 31.6, 31.2, 31.1, 28.3, 26.5, 25.9, 24.6, 24.3, 23.6, 21.1, 19.3, 18.4, 12.2.

**7.21. benzyl (E)-7-(1-(benzo[d]thiazol-2-ylsulfonyl)cyclopentyl)hept-2-enoate (2I)**

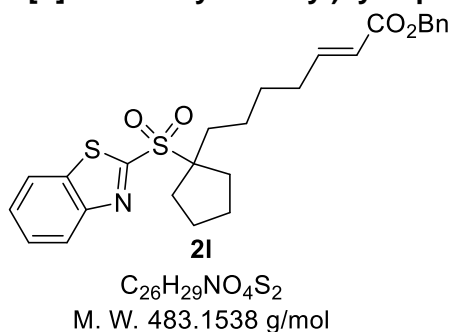

Following General Procedure **GP1**, **GP2**, **GP4**, **GP5** to afford the title compound **1I**, white solid.

**HRMS (ESI):**  $m/z$   $[M+H]^+$  Calculated for  $[C_{26}H_{30}NO_4S_2]^+$ : 484.1616; Found: 484.1626.

**<sup>1</sup>H NMR (400 MHz, CDCl<sub>3</sub>)** δ 8.24 (d, *J* = 7.8 Hz, 1H), 8.00 (dd, *J* = 7.8, 1.8 Hz, 1H), 7.72–7.52 (m, 2H), 7.44–7.27 (m, 5H), 6.96 (dt, *J* = 15.6, 6.9 Hz, 1H), 5.83 (dd, *J* = 15.9, 1.8 Hz, 1H), 5.16 (s, 2H), 2.70–2.60 (m, 2H), 2.20 (qd, *J* = 7.1, 1.7 Hz, 2H), 1.89 (dd, *J* = 11.5, 4.3 Hz, 2H), 1.84–1.72 (m, 4H), 1.66 (dt, *J* = 10.4, 4.0 Hz, 2H), 1.46 (h, *J* = 6.2 Hz, 4H). **<sup>13</sup>C NMR (101 MHz, CDCl<sub>3</sub>)** δ 166.5, 165.0, 153.2, 149.4, 137.3, 136.2, 128.7, 128.3, 128.3, 128.0, 127.6, 125.8, 122.2, 121.4, 74.4, 66.2, 35.7, 32.9, 32.0, 28.5, 26.8, 23.8.

## 7.22. benzyl (E)-7-(1-(benzo[d]thiazol-2-ylsulfonyl)cyclohexyl)hept-2-enoate (2m)

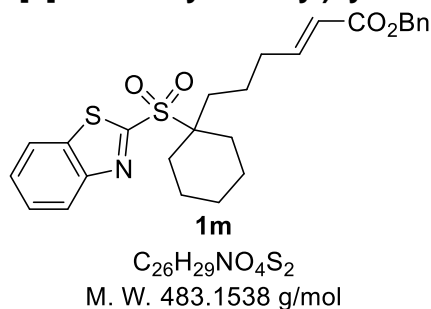

Following General Procedure **GP1**, **GP2**, **GP4**, **GP5** to afford the title compound **1l**, white solid.

**HRMS (ESI):** *m/z* [M+H]<sup>+</sup> Calculated for [C<sub>26</sub>H<sub>30</sub>NO<sub>4</sub>S<sub>2</sub>]<sup>+</sup>: 484.1616; Found: 484.1627.

**<sup>1</sup>H NMR (400 MHz, CDCl<sub>3</sub>)** δ 8.26–8.24 (m, 1H), 8.00–7.98 (m, 1H), 7.63–7.55 (m, 2H), 7.38–7.30 (m, 5H), 7.00 (dt, *J* = 15.9, 6.9 Hz, 1H), 5.88 (dt, *J* = 15.9, 1.7 Hz, 1H), 5.17 (s, 2H), 2.23 (qd, *J* = 7.2, 1.7 Hz, 2H), 2.01–1.98 (m, 4H), 1.95–1.91 (m, 2H), 1.84–1.71 (m, 4H), 1.67–1.62 (m, 1H), 1.39–1.31 (m, 2H), 1.22–1.14 (m, 1H). **<sup>13</sup>C NMR (101 MHz, CDCl<sub>3</sub>)** δ 166.4, 164.4, 153.3, 149.0, 137.4, 136.2, 128.7, 128.3, 128.3, 128.0, 127.6, 125.9, 122.3, 121.8, 68.5, 66.2, 32.7, 29.6, 28.7, 24.7, 22.1, 21.5.

## 8.0 Experimental Details for the Substrate Scope

### 8.1. benzyl 3-(1-tosylpiperidin-4-yl)propanoate (3aa)

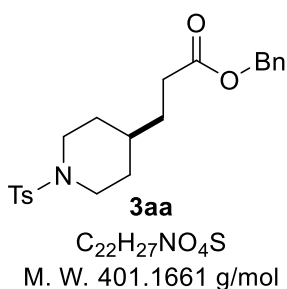

Following General Procedure **GP6** for the title compound **3aa**, by using **1a** (87.0 mg, 0.2 mmol, 1.0 equiv), **2a** (97.0 mg, 0.6 mmol, 3.0 equiv), HE (101.0 mg, 0.4 mmol, 2.0 equiv) and [*fac*-Ir(ppy)<sub>3</sub>] (1.3 mg, 0.002 mmol, 1 mol%), in THF for 12 h at 45 °C. Purification was carried out by column chromatography on silica gel or pTLC (Hexane / EtOAc = 5:1).to afford **3aa** as colourless oil (60.0 mg, 75%).

**HRMS (ESI):** *m/z* [M+H]<sup>+</sup> Calculated for [C<sub>22</sub>H<sub>28</sub>NO<sub>4</sub>S]<sup>+</sup>: 402.1739; Found: 402.1738.

**<sup>1</sup>H NMR (400 MHz, CDCl<sub>3</sub>)** δ 7.62–7.60 (m, 2H), 7.35–7.27 (m, 7H), 5.06 (s, 2H), 3.75–3.70 (m, 2H), 2.42 (s, 3H), 2.33–2.29 (m, 2H), 2.17–2.10 (m, 2H), 1.70–1.64 (m, 2H), 1.58–1.52 (m, 2H), 1.32–1.21 (m, 2H), 1.17–1.07 (m, 1H). **<sup>13</sup>C NMR (101 MHz, CDCl<sub>3</sub>)** δ 173.4, 143.6, 136.0, 133.2, 129.7, 128.7, 128.4, 128.4, 127.9, 66.4, 46.4, 34.6, 31.5, 31.2, 31.0, 21.7.

**For 1 mmol scale reaction** require **1a** (436.0 mg, 1.0 mmol, 1.0 equiv), **2a** (486.0 mg, 3.0 mmol, 3.0 equiv), HE (505.0 mg, 2.0 mmol, 2.0 equiv) and [*fac*-Ir(ppy)<sub>3</sub>] (6.5 mg, 0.01 mmol,

1 mol%), in THF for 12 h at 45 °C. Purification was carried out by column chromatography on silica gel (Hexane / EtOAc = 5:1).to afford **3aa** as colourless oil (241.0 mg, 60%).

## 8.2. ethyl 3-(1-tosylpiperidin-4-yl)propanoate (**3ab**)

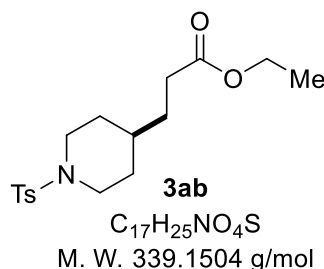

Following General Procedure **GP6** for the title compound **3ab**, by using **1a** (87.0 mg, 0.2 mmol, 1.0 equiv), **2b** (60.0 mg, 0.6 mmol, 3.0 equiv), HE (101.0 mg, 0.4 mmol, 2.0 equiv) and [*fac*-Ir(ppy)<sub>3</sub>] (1.3 mg, 0.002 mmol, 1 mol%), in THF for 12 h at 45 °C. Purification was carried out by PTLC (Hexane/EtOAc = 5:1).to afford **3ab** as colourless oil (37.0 mg, 54%).

**HRMS (ESI):** m/z [M+H]<sup>+</sup> Calculated for [C<sub>17</sub>H<sub>26</sub>NO<sub>4</sub>S]<sup>+</sup>: 340.1583; Found: 340.1590.

**<sup>1</sup>H NMR (400 MHz, CDCl<sub>3</sub>)** δ 7.64–7.62 (m, 2H), 7.31 (d, *J* = 8.1 Hz, 2H), 4.09 (q, *J* = 7.3 Hz, 2H), 3.78–3.73 (m, 2H), 2.43 (s, 3H), 2.28–2.25 (m, 2H), 2.23–2.17 (m, 2H), 1.73–1.69 (m, 2H), 1.58–1.52 (m, 3H), 1.35–1.28 (m, 2H), 1.24–1.21 (m, 3H). **<sup>13</sup>C NMR (101 MHz, CDCl<sub>3</sub>)** δ 173.6, 143.5, 133.1, 129.7, 127.8, 60.5, 46.4, 34.6, 31.5, 31.2, 31.0, 21.6, 14.3.

## 8.3. methyl 3-(1-tosylpiperidin-4-yl)propanoate(**3ac**)

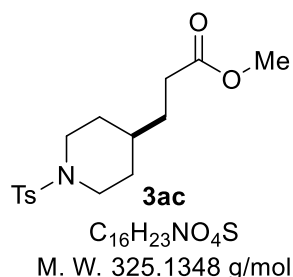

Following General Procedure **GP6** for the title compound **3ab**, by using **1a** (87.0 mg, 0.2 mmol, 1.0 equiv), **2c** (51.6 mg, 0.6 mmol, 3.0 equiv), HE (101.0 mg, 0.4 mmol, 2.0 equiv) and [*fac*-Ir(ppy)<sub>3</sub>] (1.3 mg, 0.002 mmol, 1 mol%), in THF for 12 h at 45 °C. Purification was carried out by PTLC (Hexane/EtOAc = 5:1).to afford **3ab** as colourless oil (33.0 mg, 51%).

**HRMS (ESI):** m/z [M+H]<sup>+</sup> Calculated for [C<sub>16</sub>H<sub>24</sub>NO<sub>4</sub>S]<sup>+</sup>: 326.1426; Found: 326.1436.

**<sup>1</sup>H NMR (400 MHz, CDCl<sub>3</sub>)** δ 7.63–7.61 (m, 2H), 7.31 (d, *J* = 8.1 Hz, 2H), 3.78–3.73 (m, 2H), 3.63 (s, 3H), 2.43 (s, 3H), 2.28 (t, *J* = 7.7 Hz, 2H), 2.23–2.16 (m, 2H), 1.74–1.69 (m, 2H), 1.58–1.52 (m, 2H), 1.34–1.24 (m, 2H), 1.22–1.17 (m, 1H). **<sup>13</sup>C NMR (101 MHz, CDCl<sub>3</sub>)** δ 174.0, 143.6, 133.1, 129.7, 127.9, 51.8, 46.4, 34.6, 31.3, 31.2, 31.0, 21.7.

## 8.4. (1*S*,2*R*,5*S*)-2-isopropyl-5-methylcyclohexyl 3-(1-tosylpiperidin-4-yl)propanoate (**3ad**)

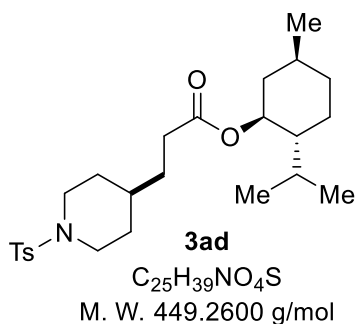

Following General Procedure **GP6** for the title compound **3ab**, by using **1a** (87.0 mg, 0.2 mmol, 1.0 equiv), **2d** (126.0 mg, 0.6 mmol, 3.0 equiv), HE (101.0 mg, 0.4 mmol, 2.0 equiv) and [*fac*-Ir(ppy)<sub>3</sub>] (1.3 mg, 0.002 mmol, 1 mol%), in THF for 12 h at 45 °C. Purification was carried out by PTLC (Hexane/EtOAc = 5:1).to afford **3ab** as colourless oil (44.0 mg, 49%).

**HRMS (ESI):** *m/z* [M+H]<sup>+</sup> Calculated for [C<sub>25</sub>H<sub>40</sub>NO<sub>4</sub>S]<sup>+</sup>: 450.2678; Found: 450.2684.

**<sup>1</sup>H NMR (400 MHz, CDCl<sub>3</sub>)** δ 7.62–7.59 (m, 2H), 7.31–7.29 (m, 2H), 4.65–4.58 (m, 1H), 3.76–3.72 (m, 2H), 2.41 (s, 3H), 2.26–2.22 (m, 2H), 2.16 (tt, *J* = 11.8, 2.9 Hz, 2H), 1.93–1.88 (m, 1H), 1.81–1.74 (m, 2H), 1.72–1.71 (m, 1H), 1.65–1.61 (m, 2H), 1.53 (q, *J* = 7.3 Hz, 2H), 1.47–1.39 (m, 1H), 1.35–1.23 (m, 4H), 1.18–1.11 (m, 1H), 1.05–0.94 (m, 2H), 0.87–0.85 (m, 3H), 0.84–0.83 (m, 3H), 0.69–0.66 (m, 3H) **<sup>13</sup>C NMR (101 MHz, CDCl<sub>3</sub>)** δ 173.2, 143.6, 133.1, 129.7, 127.9, 74.3, 47.1, 46.5, 41.0, 34.7, 34.3, 32.0, 31.5, 31.3, 31.2, 26.3, 23.4, 22.1, 21.7, 20.9, 16.3.

#### 8.5. benzyl 2-methyl-3-(1-tosylpiperidin-4-yl)propanoate (**3ae**)

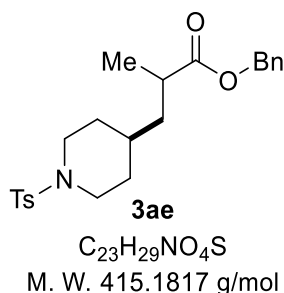

Following General Procedure **GP6** for the title compound **3ab**, by using **1a** (87.0 mg, 0.2 mmol, 1.0 equiv), **2e** (105.6 mg, 0.6 mmol, 3.0 equiv), HE (101.0 mg, 0.4 mmol, 2.0 equiv) and [*fac*-Ir(ppy)<sub>3</sub>] (1.3 mg, 0.002 mmol, 1 mol%), in THF for 12 h at 45 °C. Purification was carried out by PTLC (Hexane/EtOAc = 5:1).to afford **3ab** as colourless oil (47.0 mg, 56%).

**HRMS (ESI):** *m/z* [M+H]<sup>+</sup> Calculated for [C<sub>23</sub>H<sub>30</sub>NO<sub>4</sub>S]<sup>+</sup>: 416.1896; Found: 416.1906.

**<sup>1</sup>H NMR (400 MHz, CDCl<sub>3</sub>)** δ 7.63–7.60 (m, 2H), 7.34–7.32 (m, 2H), 7.30–7.22 (m, 5H), 5.11 (d, *J* = 12.3 Hz, 1H), 5.02 (d, *J* = 12.2 Hz, 1H), 3.73–3.67 (m, 2H), 2.56–2.49 (m, 1H), 2.45 (s, 3H), 2.09–2.00 (m, 2H), 1.75–1.69 (m, 1H), 1.66–1.60 (m, 2H), 1.29–1.25 (m, 1H), 1.24–1.19 (m, 2H), 1.12 (d, *J* = 6.9 Hz, 3H), 1.07–1.00 (m, 1H). **<sup>13</sup>C NMR (101 MHz, CDCl<sub>3</sub>)** δ 176.4, 143.5, 136.2, 133.2, 129.7, 128.6, 128.4, 128.3, 127.9, 66.2, 46.4(2C), 40.4, 36.9, 33.1, 31.7, 31.2, 21.7, 17.8.

#### 8.6. 4-(2-(phenylsulfonyl)ethyl)-1-tosylpiperidine (**3af**)



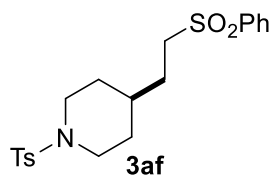

**3af**  
 $C_{20}H_{25}NO_4S_2$   
 M. W. 407.1225 g/mol

Following General Procedure **GP6** for the title compound **3af**, by using **1a** (87.0 mg, 0.2 mmol, 1.0 equiv), **2f** (105.6 mg, 0.6 mmol, 3.0 equiv), HE (101.0 mg, 0.4 mmol, 2.0 equiv) and [*fac*-Ir(ppy)<sub>3</sub>] (1.3 mg, 0.002 mmol, 1 mol%), in THF for 12 h at 45 °C. Purification was carried out by PTLC (Hexane/EtOAc = 5:3).to afford **3af** as colourless oil (49.0 mg, 60%).

**HRMS (ESI):**  $m/z$  [M+H]<sup>+</sup> Calculated for [C<sub>20</sub>H<sub>26</sub>NO<sub>4</sub>S<sub>2</sub>]<sup>+</sup>: 408.1303; Found: 408.1311.

**<sup>1</sup>H NMR (400 MHz, CDCl<sub>3</sub>)** δ 7.89–7.86 (m, 2H), 7.68–7.64 (m, 1H), 7.62–7.54 (m, 4H), 7.32–7.29 (m, 2H), 3.76–3.71 (m, 2H), 3.05–3.01 (m, 2H), 2.42 (s, 3H), 2.21–2.15 (m, 2H), 1.69–1.64 (m, 4H), 1.32–1.21 (m, 3H). **<sup>13</sup>C NMR (101 MHz, CDCl<sub>3</sub>)** δ 143.7, 139.1, 134.0, 133.0, 129.8, 129.5, 128.1, 127.8, 53.8, 46.2, 34.1, 31.1, 28.6, 21.7.

### 8.7. 3-(1-tosylpiperidin-4-yl)propanenitrile (**3ag**)

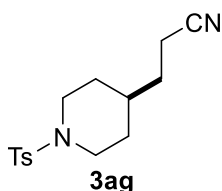

**3ag**  
 $C_{15}H_{20}N_2O_2S$   
 M. W. 292.1245 g/mol

Following General Procedure **GP6** for the title compound **3ag**, by using **1a** (87.0 mg, 0.2 mmol, 1.0 equiv), **2g** (105.6 mg, 0.6 mmol, 3.0 equiv), HE (101.0 mg, 0.4 mmol, 2.0 equiv) and [*fac*-Ir(ppy)<sub>3</sub>] (1.3 mg, 0.002 mmol, 1 mol%), in THF for 12 h at 45 °C. Purification was carried out by PTLC (Hexane/EtOAc = 10:3).to afford **3ag** as white solid (34.0 mg, 58%).

**HRMS (ESI):**  $m/z$  [M+H]<sup>+</sup> Calculated for [C<sub>15</sub>H<sub>21</sub>N<sub>2</sub>O<sub>2</sub>S]<sup>+</sup>: 293.1324; Found: 293.1334.

**<sup>1</sup>H NMR (400 MHz, CDCl<sub>3</sub>)** δ 7.65–7.62 (m, 2H), 7.34–7.32 (m, 2H), 3.83–3.78 (m, 2H), 2.44 (s, 3H), 2.35 (t, *J* = 7.1 Hz, 2H), 2.26–2.19 (m, 2H), 1.76–1.73 (m, 2H), 1.61–1.58 (m, 2H), 1.39–1.30 (m, 3H). **<sup>13</sup>C NMR (101 MHz, CDCl<sub>3</sub>)** δ 143.8, 132.9, 129.8, 127.8, 119.4, 46.3, 34.1, 31.2, 30.9, 21.7, 14.7.

### 8.8. N,N-diphenyl-3-(1-tosylpiperidin-4-yl)propanamide (**3ah**)

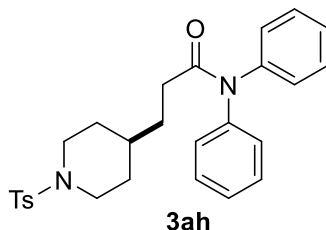

**3ah**  
 $C_{27}H_{30}N_2O_3S$   
 M. W. 462.1977 g/mol

Following General Procedure **GP6** for the title compound **3ah**, by using **1a** (87.0 mg, 0.2 mmol, 1.0 equiv), **2h** (105.6 mg, 0.6 mmol, 3.0 equiv), HE (101.0 mg, 0.4 mmol, 2.0 equiv) and [*fac*-

Ir(ppy)<sub>3</sub>] (1.3 mg, 0.002 mmol, 1 mol%), in THF for 12 h at 45 °C. Purification was carried out by PTLC (Hexane/EtOAc = 10:3).to afford **3ah** as white solid (60.0 mg, 65%).

**HRMS (ESI):** m/z [M+H]<sup>+</sup> Calculated for [C<sub>27</sub>H<sub>31</sub>N<sub>2</sub>O<sub>3</sub>S]<sup>+</sup>: 463.2055; Found: 463.2068.

**<sup>1</sup>H NMR (400 MHz, CDCl<sub>3</sub>)** δ 7.62–7.58 (m, 2H), 7.51–7.25 (m, 7H), 7.22–7.20 (m, 5H), 3.69–3.67 (m, 2H), 2.41 (s, 3H), 2.22–2.18 (m, 2H), 2.15–2.08 (m, 2H), 1.59–1.57 (m, 3H), 1.21–1.18 (m, 3H), 0.87–0.83 (m, 1H). **<sup>13</sup>C NMR (101 MHz, CDCl<sub>3</sub>)** δ 172.9, 143.5, 142.8, 133.1, 130.0, 129.7, 129.0, 127.8, 126.4, 46.4, 34.6, 32.4, 31.6, 31.2, 21.6.

### 8.9. benzyl 4-cyclohexyl-4-methylpentanoate (**3fa**)

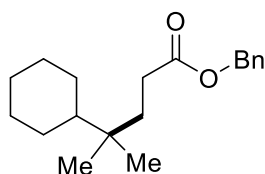

**3fa**

C<sub>19</sub>H<sub>28</sub>O<sub>2</sub>

M. W. 288.2089 g/mol

Following General Procedure **GP6** for the title compound **3fa**, by using **1f** (65.0 mg, 0.2 mmol, 1.0 equiv), **2a** (97.0 mg, 0.6 mmol, 3.0 equiv), HE (101.0 mg, 0.4 mmol, 2.0 equiv) and [*fac*-Ir(ppy)<sub>3</sub>] (1.3 mg, 0.002 mmol, 1 mol%), in THF for 12 h at 45 °C. Purification was carried out by PTLC (Hexane/EtOAc = 40:1).to afford **3fa** as colourless oil (37.0 mg, 65%).

**HRMS (ESI):** m/z [M+H]<sup>+</sup> Calculated for [C<sub>19</sub>H<sub>29</sub>O<sub>2</sub>]<sup>+</sup>: 289.2168; Found: 289.2181.

**<sup>1</sup>H NMR (400 MHz, CDCl<sub>3</sub>)** δ 7.39–7.30 (m, 5H), 5.11 (s, 2H), 2.31–2.27 (m, 2H), 1.78–1.73 (m, 2H), 1.70–1.65 (m, 2H), 1.61–1.59 (m, 3H), 1.19–1.09 (m, 3H), 1.03–0.93 (m, 3H), 0.80 (s, 6H). **<sup>13</sup>C NMR (101 MHz, CDCl<sub>3</sub>)** δ 174.6, 136.2, 128.7, 128.4, 128.3, 66.3, 46.0, 35.1, 34.7, 29.5, 27.3, 27.2, 26.8, 24.6.

### 8.10. benzyl 4,4-dimethyl-6-phenylhexanoate (**3ga**)

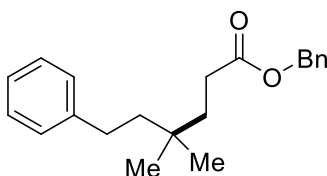

**3ga**

C<sub>21</sub>H<sub>26</sub>O<sub>2</sub>

M. W. 310.1933 g/mol

Following General Procedure **GP6** for the title compound **3ga**, by using **1g** (70.0 mg, 0.2 mmol, 1.0 equiv), **2a** (97.0 mg, 0.6 mmol, 3.0 equiv), HE (101.0 mg, 0.4 mmol, 2.0 equiv) and [*fac*-Ir(ppy)<sub>3</sub>] (1.3 mg, 0.002 mmol, 1 mol%), in THF for 12 h at 45 °C. Purification was carried out by PTLC (Hexane/EtOAc = 40:1).to afford **3ga** as colourless oil (32.0 mg, 52%).

**HRMS (ESI):** m/z [M+H]<sup>+</sup> Calculated for [C<sub>21</sub>H<sub>27</sub>O<sub>2</sub>]<sup>+</sup>: 311.2011; Found: 311.2024.

**<sup>1</sup>H NMR (400 MHz, CDCl<sub>3</sub>)** δ 7.28–7.24 (m, 5H), 7.19–7.15 (m, 2H), 7.09–7.05 (m, 3H), 5.02 (s, 2H), 2.47–2.43 (m, 2H), 2.28–2.24 (m, 2H), 1.58–1.54 (m, 2H), 1.42–1.37 (m, 2H), 0.84 (s, 6H). **<sup>13</sup>C NMR (101 MHz, CDCl<sub>3</sub>)** δ 174.3, 143.2, 136.1, 128.7, 128.5, 128.4(2C), 128.4, 125.8, 66.4, 44.2, 36.4, 32.8, 30.7, 29.7, 26.8.

### 8.11. benzyl 4,4-dimethyloctanoate (**3ha**)

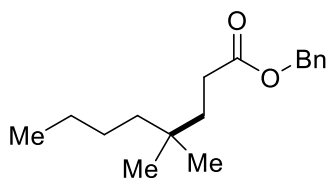

**3ha**

$C_{17}H_{26}O_2$

M. W. 262.1933 g/mol

Following General Procedure **GP6** for the title compound **3ha**, by using **1h** (60.0 mg, 0.2 mmol, 1.0 equiv), **2a** (97.0 mg, 0.6 mmol, 3.0 equiv), HE (101.0 mg, 0.4 mmol, 2.0 equiv) and [*fac*-Ir(ppy)<sub>3</sub>] (1.3 mg, 0.002 mmol, 1 mol%), in THF for 12 h at 45 °C. Purification was carried out by PTLC (Hexane/EtOAc = 40:1).to afford **3ha** as colourless oil (33.0 mg, 62%).

**HRMS (ESI):** *m/z* [M+H]<sup>+</sup> Calculated for [C<sub>17</sub>H<sub>27</sub>O<sub>2</sub>]<sup>+</sup>: 263.2011; Found: 263.2011.

**<sup>1</sup>H NMR (400 MHz, CDCl<sub>3</sub>)** δ 7.37–7.34 (m, 5H), 5.11 (s, 2H), 2.32–2.28 (m, 2H), 1.58–1.54 (m, 2H), 1.27–1.23 (m, 2H), 1.21–1.13 (m, 4H), 0.89 (t, *J* = 6.9 Hz, 3H), 0.84 (s, 6H). **<sup>13</sup>C NMR (101 MHz, CDCl<sub>3</sub>)** δ 174.5, 136.2, 128.7, 128.4, 128.3, 66.3, 41.6, 36.6, 32.5, 29.8, 27.0, 26.3, 23.7, 14.3.

#### 8.12. benzyl 3-(1-methylcyclopentyl)propanoate (**3ia**)

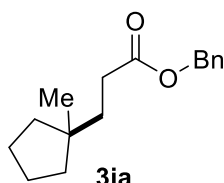

**3ia**

$C_{16}H_{22}O_2$

M. W. 246.1620 g/mol

Following General Procedure **GP6** for the title compound **3ia**, by using **1i** (56.0 mg, 0.2 mmol, 1.0 equiv), **2a** (97.0 mg, 0.6 mmol, 3.0 equiv), HE (101.0 mg, 0.4 mmol, 2.0 equiv) and [*fac*-Ir(ppy)<sub>3</sub>] (1.3 mg, 0.002 mmol, 1 mol%), in THF for 12 h at 45 °C. Purification was carried out by PTLC (Hexane/EtOAc = 40:1).to afford **3ia** as colourless oil (33.0 mg, 68%).

**HRMS (ESI):** *m/z* [M+H]<sup>+</sup> Calculated for [C<sub>16</sub>H<sub>23</sub>O<sub>2</sub>]<sup>+</sup>: 247.1698; Found: 247.1711.

**<sup>1</sup>H NMR (400 MHz, CDCl<sub>3</sub>)** δ 7.40–7.30 (m, 5H), 5.11 (s, 2H), 2.38–2.33 (m, 2H), 1.69–1.65 (m, 2H), 1.63–1.58 (m, 4H), 1.39–1.29 (m, 4H), 0.91 (s, 3H). **<sup>13</sup>C NMR (101 MHz, CDCl<sub>3</sub>)** δ 174.5, 136.2, 128.7, 128.4, 128.3, 66.3, 41.8, 39.3, 37.1, 31.0, 25.7, 24.5.

#### 8.13. benzyl 4,4-difluoro-4-phenylbutanoate (**3ja**)

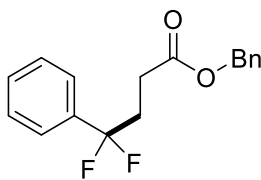

**3ja**

$C_{17}H_{16}F_2O_2$

M. W. 290.1118 g/mol

Following General Procedure **GP6** for the title compound **3ja**, by using **1j** (65.0 mg, 0.2 mmol, 1.0 equiv), **2a** (97.0 mg, 0.6 mmol, 3.0 equiv), HE (101.0 mg, 0.4 mmol, 2.0 equiv) and [*fac*-

$\text{Ir}(\text{ppy})_3$ ] (1.3 mg, 0.002 mmol, 1 mol%), in THF for 12 h at 45 °C. Purification was carried out by PTLC (Hexane/EtOAc = 40:1).to afford **3ja** as colourless oil (26.0 mg, 45%).

**HRMS (ESI):**  $m/z$   $[\text{M}+\text{H}]^+$  Calculated for  $[\text{C}_{17}\text{H}_{17}\text{F}_2\text{O}_2]^+$ : 291.1197; Found: 291.1190.

**$^1\text{H}$  NMR (400 MHz,  $\text{CDCl}_3$ )**  $\delta$  7.48–7.45 (m, 2H), 7.44–7.39 (m, 3H), 7.37–7.31 (m, 5H), 5.10 (s, 2H), 2.60–2.46 (m, 4H).  **$^{13}\text{C}$  NMR (101 MHz,  $\text{CDCl}_3$ )**  $\delta$  172.1,  $\delta$  136.7 (t,  $J$  = 26.3 Hz), 135.7, 130.0, 128.7, 128.6, 128.5, 128.4, 125.0 (t,  $J$  = 6.2 Hz), 122.3 (t,  $J$  = 242.5 Hz), 66.7, 34.4 (t,  $J$  = 28.4 Hz), 27.9 (t,  $J$  = 4.3 Hz).  **$^{19}\text{F}$  NMR (376 MHz,  $\text{CDCl}_3$ )**  $\delta$  -96.9 (d,  $J$  = 32.3 Hz).

#### 8.14. benzyl 4-methylpentanoate (**3ka**)

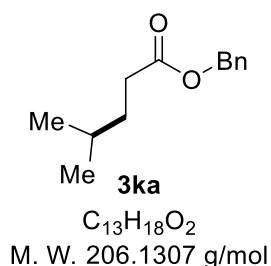

Following General Procedure **GP6** for the title compound **3ka**, by using **1k** (48.0 mg, 0.2 mmol, 1.0 equiv), **2a** (97.0 mg, 0.6 mmol, 3.0 equiv), HE (101.0 mg, 0.4 mmol, 2.0 equiv) and  $[\text{fac-Ir}(\text{ppy})_3]$  (1.3 mg, 0.002 mmol, 1 mol%), in THF for 12 h at 45 °C. Purification was carried out by PTLC (Hexane/EtOAc = 40:1).to afford **3ka** as colourless oil (25.0 mg, 61%).

**HRMS (ESI):**  $m/z$   $[\text{M}+\text{H}]^+$  Calculated for  $[\text{C}_{13}\text{H}_{19}\text{O}_2]^+$ : 207.1385; Found: 207.1383.

**$^1\text{H}$  NMR (400 MHz,  $\text{CDCl}_3$ )**  $\delta$  7.38–7.31 (m, 5H), 5.10 (s, 2H), 2.37–2.33 (m, 2H), 1.56–1.53 (m, 3H), 0.88 (d,  $J$  = 6.3 Hz, 6H).  **$^{13}\text{C}$  NMR (101 MHz,  $\text{CDCl}_3$ )**  $\delta$  174.1, 136.3, 129.9, 128.7, 128.3, 66.3, 33.9, 32.6, 27.8, 22.4.

#### 8.15. benzyl (R)-4-methyl-5-phenylpentanoate (**3la**)

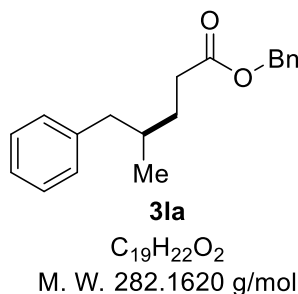

Following General Procedure **GP6** for the title compound **3la**, by using **1l** (64.0 mg, 0.2 mmol, 1.0 equiv), **2a** (97.0 mg, 0.6 mmol, 3.0 equiv), HE (101.0 mg, 0.4 mmol, 2.0 equiv) and  $[\text{fac-Ir}(\text{ppy})_3]$  (1.3 mg, 0.002 mmol, 1 mol%), in THF for 12 h at 45 °C. Purification was carried out by PTLC (Hexane/EtOAc = 40:1).to afford **3la** as colourless oil (32.0 mg, 57%).

**HRMS (ESI):**  $m/z$   $[\text{M}+\text{H}]^+$  Calculated for  $[\text{C}_{19}\text{H}_{23}\text{O}_2]^+$ : 283.1698; Found: 283.1681.

**$^1\text{H}$  NMR (400 MHz,  $\text{CDCl}_3$ )**  $\delta$  7.39–7.30 (m, 5H), 7.28–7.25 (m, 2H), 7.20–7.16 (m, 1H), 7.13–7.11 (m, 2H), 5.11 (s, 2H), 2.66–2.62 (m, 1H), 2.45–2.36 (m, 3H), 1.80–1.71 (m, 2H), 1.55–1.48 (m, 1H), 0.86 (d,  $J$  = 6.4 Hz, 3H).  **$^{13}\text{C}$  NMR (101 MHz,  $\text{CDCl}_3$ )**  $\delta$  173.8, 141.0, 136.2, 129.3, 128.7, 128.5, 128.4, 128.3, 125.9, 66.3, 43.5, 34.7, 32.3, 31.7, 19.1.

#### 8.16. benzyl 3-cyclopentylpropanoate (**3ma**)

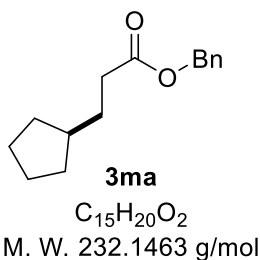

Following General Procedure **GP6** for the title compound **3ma**, by using **1m** (54.0 mg, 0.2 mmol, 1.0 equiv), **2a** (97.0 mg, 0.6 mmol, 3.0 equiv), HE (101.0 mg, 0.4 mmol, 2.0 equiv) and [*fac*-Ir(ppy)<sub>3</sub>] (1.3 mg, 0.002 mmol, 1 mol%), in THF for 12 h at 45 °C. Purification was carried out by PTLC (Hexane/EtOAc = 40:1).to afford **3ma** as colourless oil (26.0 mg, 56%).

**HRMS (ESI):** *m/z* [M+H]<sup>+</sup> Calculated for [C<sub>15</sub>H<sub>21</sub>O<sub>2</sub>]<sup>+</sup>: 233.1542; Found: 233.1558.

**<sup>1</sup>H NMR (400 MHz, CDCl<sub>3</sub>)** δ 7.38–7.32 (m, 5H), 5.11 (s, 2H), 2.39–2.35 (m, 2H), 1.79–1.71 (m, 3H), 1.69–1.64 (m, 2H), 1.62–1.58 (m, 3H), 1.53–1.48 (m, 2H), 1.10–1.06 (m, 1H). **<sup>13</sup>C NMR (101 MHz, CDCl<sub>3</sub>)** δ 174.0, 136.2, 128.7, 128.3, 128.3, 66.2, 39.8, 33.8, 32.5, 31.2, 25.2.

#### 8.17. benzyl 3-cyclohexylpropanoate (**3na**)

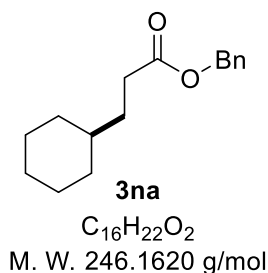

Following General Procedure **GP6** for the title compound **3na**, by using **1n** (56.0 mg, 0.2 mmol, 1.0 equiv), **2a** (97.0 mg, 0.6 mmol, 3.0 equiv), HE (101.0 mg, 0.4 mmol, 2.0 equiv) and [*fac*-Ir(ppy)<sub>3</sub>] (1.3 mg, 0.002 mmol, 1 mol%), in THF for 12 h at 45 °C. Purification was carried out by PTLC (Hexane/EtOAc = 40:1).to afford **3na** as colourless oil (30.0 mg, 60%).

**HRMS (ESI):** *m/z* [M-H]<sup>+</sup> Calculated for [C<sub>16</sub>H<sub>21</sub>O<sub>2</sub>]<sup>+</sup>: 245.1542; Found: 245.1534.

**<sup>1</sup>H NMR (400 MHz, CDCl<sub>3</sub>)** δ 7.39–7.30 (m, 5H), 5.11 (s, 2H), 2.38–2.34 (m, 2H), 1.70–1.65 (m, 4H), 1.54–1.51 (m, 2H), 1.19–1.13 (m, 4H), 0.89–0.83 (m, 3H). **<sup>13</sup>C NMR (101 MHz, CDCl<sub>3</sub>)** δ 174.2, 136.2, 128.7, 128.3, 128.3, 66.2, 37.3, 33.1, 32.5, 32.1, 26.6, 26.3.

#### 8.18. benzyl octanoate (**3oa**)

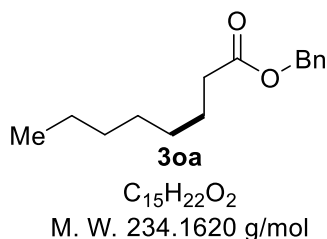

Following General Procedure **GP6** for the title compound **3oa**, by using **1o** (54.0 mg, 0.2 mmol, 1.0 equiv), **2a** (97.0 mg, 0.6 mmol, 3.0 equiv), HE (101.0 mg, 0.4 mmol, 2.0 equiv) and [*fac*-Ir(ppy)<sub>3</sub>] (1.3 mg, 0.002 mmol, 1 mol%), in THF for 12 h at 45 °C. Purification was carried out by PTLC (Hexane/EtOAc = 40:1).to afford **3oa** as colourless oil (24.0 mg, 50%).

**HRMS (ESI):** *m/z* [M+H]<sup>+</sup> Calculated for [C<sub>15</sub>H<sub>23</sub>O<sub>2</sub>]<sup>+</sup>: 235.1698; Found: 235.1698.

**<sup>1</sup>H NMR (400 MHz, CDCl<sub>3</sub>)** δ 7.37–7.33 (m, 5H), 5.11 (s, 2H), 2.35 (t, *J* = 7.5 Hz, 2H), 1.66–1.60 (m, 3H), 1.33–1.27 (m, 7H), 0.89–0.86 (m, 3H). **<sup>13</sup>C NMR (101 MHz, CDCl<sub>3</sub>)** δ 173.9, 136.3, 128.7, 128.3 (2C), 66.2, 34.5, 31.6, 28.9, 25.1, 22.6, 14.2.

#### 8.19. benzyl heptanoate (3pa)

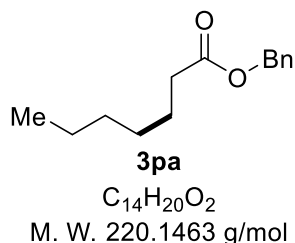

Following General Procedure **GP6** for the title compound **3pa**, by using **1p** (51.0 mg, 0.2 mmol, 1.0 equiv), **2a** (97.0 mg, 0.6 mmol, 3.0 equiv), HE (101.0 mg, 0.4 mmol, 2.0 equiv) and [*fac*-Ir(ppy)<sub>3</sub>] (1.3 mg, 0.002 mmol, 1 mol%), in THF for 12 h at 45 °C. Purification was carried out by PTLC (Hexane/EtOAc = 40:1).to afford **3pa** as colourless oil (23.0 mg, 52%).

**HRMS (ESI):** *m/z* [M+H]<sup>+</sup> Calculated for [C<sub>14</sub>H<sub>21</sub>O<sub>2</sub>]<sup>+</sup>: 221.1542; Found: 221.1538.

**<sup>1</sup>H NMR (400 MHz, CDCl<sub>3</sub>)** δ 7.39–7.30 (m, 5H), 5.11 (s, 2H), 2.35 (t, *J* = 7.5 Hz, 2H), 1.66–1.62 (m, 2H), 1.33–1.27 (m, 6H), 0.90–0.86 (m, 3H). **<sup>13</sup>C NMR (101 MHz, CDCl<sub>3</sub>)** δ 173.9, 136.3, 128.7, 128.3(2C), 66.2, 34.5, 31.6, 28.9, 25.1, 22.6, 14.2.

#### 8.20. benzyl 5-phenylpentanoate (3qa)

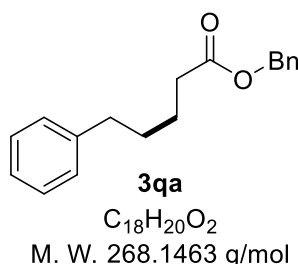

Following General Procedure **GP6** for the title compound **3qa**, by using **1q** (61.0 mg, 0.2 mmol, 1.0 equiv), **2a** (97.0 mg, 0.6 mmol, 3.0 equiv), HE (101.0 mg, 0.4 mmol, 2.0 equiv) and [*fac*-Ir(ppy)<sub>3</sub>] (1.3 mg, 0.002 mmol, 1 mol%), in THF for 12 h at 45 °C. Purification was carried out by PTLC (Hexane/EtOAc = 40:1).to afford **3qa** as colourless oil (20.0 mg, 65%).

**HRMS (ESI):** *m/z* [M-H]<sup>+</sup> Calculated for [C<sub>18</sub>H<sub>19</sub>O<sub>2</sub>]<sup>+</sup>: 267.1385; Found: 267.1391.

**<sup>1</sup>H NMR (400 MHz, CDCl<sub>3</sub>)** δ 7.39–7.30 (m, 5H), 7.29–7.27 (m, 1H), 7.26–7.24 (m, 1H), 7.20–7.14 (m, 3H), 5.11 (s, 2H), 2.62 (t, *J* = 7.3 Hz, 2H), 2.39 (t, *J* = 7.2 Hz, 2H), 1.72–1.62 (m, 4H). **<sup>13</sup>C NMR (101 MHz, CDCl<sub>3</sub>)** δ 173.6, 142.3, 136.2, 130.1, 128.7, 128.5, 128.5, 128.3, 125.9, 66.3, 35.7, 34.3, 31.0, 24.7.

#### 8.21. benzyl 4-cyclohexylbutanoate (3ra)

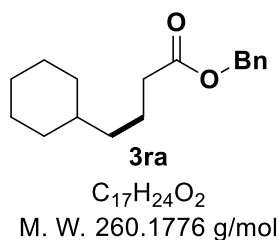

Following General Procedure **GP6** for the title compound **3ra**, by using **1r** (59.0 mg, 0.2 mmol, 1.0 equiv), **2a** (97.0 mg, 0.6 mmol, 3.0 equiv), HE (101.0 mg, 0.4 mmol, 2.0 equiv) and [*fac*-Ir(ppy)<sub>3</sub>] (1.3 mg, 0.002 mmol, 1 mol%), in THF for 12 h at 45 °C. Purification was carried out by PTLC (Hexane/EtOAc = 40:1).to afford **3ra** as colourless oil (20.0 mg, 38%).

**HRMS (ESI):** m/z [M+H]<sup>+</sup> Calculated for [C<sub>17</sub>H<sub>25</sub>O<sub>2</sub>]<sup>+</sup>: 261.1855; Found: 261.1849.

**<sup>1</sup>H NMR (400 MHz, CDCl<sub>3</sub>)** δ 7.39–7.30 (m, 5H), 5.11 (s, 2H), 2.33 (t, *J* = 7.6 Hz, 2H), 1.70–1.62 (m, 7H), 1.23–1.13 (m, 6H), 0.90–0.81 (m, 2H). **<sup>13</sup>C NMR (101 MHz, CDCl<sub>3</sub>)** δ 173.9, 136.3, 128.7, 128.3, 128.3, 66.2, 37.5, 37.0, 34.8, 33.4, 26.8, 26.5, 22.5.

## 8.22. benzyl 6-bromohexanoate (**3sa**)

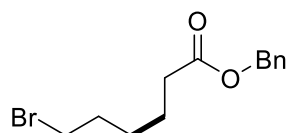

**3sa**

C<sub>13</sub>H<sub>17</sub>BrO<sub>2</sub>

M. W. 284.0412 g/mol

Following General Procedure **GP6** for the title compound **3sa**, by using **1s** (64.0 mg, 0.2 mmol, 1.0 equiv), **2a** (97.0 mg, 0.6 mmol, 3.0 equiv), HE (101.0 mg, 0.4 mmol, 2.0 equiv) and [*fac*-Ir(ppy)<sub>3</sub>] (1.3 mg, 0.002 mmol, 1 mol%), in THF for 12 h at 45 °C. Purification was carried out by PTLC (Hexane/EtOAc = 40:1).to afford **3sa** as colourless oil (27.0 mg, 48%).

**HRMS (ESI):** m/z [M+H]<sup>+</sup> Calculated for [C<sub>13</sub>H<sub>18</sub>BrO<sub>2</sub>]<sup>+</sup>: 285.0490; Found: 285.0484.

**<sup>1</sup>H NMR (400 MHz, CDCl<sub>3</sub>)** δ 7.38–7.32(m, 5H), 5.12 (s, 2H), 3.39 (t, *J* = 6.8 Hz, 2H), 2.38 (t, *J* = 7.5 Hz, 2H), 1.90–1.83 (m, 2H), 1.72–1.64 (m, 2H), 1.51–1.45 (m, 2H). **<sup>13</sup>C NMR (101 MHz, CDCl<sub>3</sub>)** δ 173.4, 136.1, 128.7, 128.5, 128.4, 66.4, 34.2, 33.6, 32.5, 27.8, 24.2.

## 8.23. benzyl 8-chlorooctanoate (**3ta**)

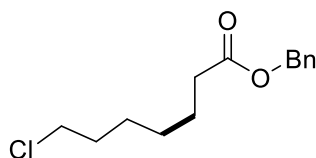

**3ta**

C<sub>14</sub>H<sub>19</sub>ClO<sub>2</sub>

M. W. 254.1074 g/mol

Following General Procedure **GP6** for the title compound **3ta**, by using **1t** (61.0 mg, 0.2 mmol, 1.0 equiv), **2a** (97.0 mg, 0.6 mmol, 3.0 equiv), HE (101.0 mg, 0.4 mmol, 2.0 equiv) and [*fac*-Ir(ppy)<sub>3</sub>] (1.3 mg, 0.002 mmol, 1 mol%), in THF for 12 h at 45 °C. Purification was carried out by PTLC (Hexane/EtOAc = 40:1).to afford **3ta** as colourless oil (24.0 mg, 45%).

**HRMS (ESI):** m/z [M+H]<sup>+</sup> Calculated for [C<sub>14</sub>H<sub>20</sub>ClO<sub>2</sub>]<sup>+</sup>: 255.1152; Found: 255.1163.

**<sup>1</sup>H NMR (400 MHz, CDCl<sub>3</sub>)** δ 7.36–7.31 (m, 5H), 5.10 (s, 2H), 3.50 (t, *J* = 6.7 Hz, 2H), 2.35 (t, *J* = 7.4 Hz, 2H), 1.78–1.71 (m, 2H), 1.69–1.61 (m, 2H), 1.47–1.39 (m, 2H), 1.36–1.30 (m, 2H). **<sup>13</sup>C NMR (101 MHz, CDCl<sub>3</sub>)** δ 173.6, 136.2, 128.7, 128.4 (2C), 66.3, 45.1, 34.3, 32.5, 28.5, 26.6, 24.9.

## 8.24. benzyl 5,5,5-trifluoropentanoate (**3ua**)

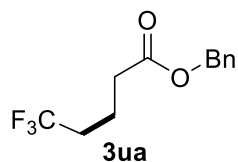

$C_{12}H_{13}F_3O_2$   
M. W. 246.0868 g/mol

Following General Procedure **GP6** for the title compound **3ua**, by using **1u** (56.0 mg, 0.2 mmol, 1.0 equiv), **2a** (97.0 mg, 0.6 mmol, 3.0 equiv), HE (101.0 mg, 0.4 mmol, 2.0 equiv) and [*fac*-Ir(ppy)<sub>3</sub>] (1.3 mg, 0.002 mmol, 1 mol%), in THF for 12 h at 45 °C. Purification was carried out by PTLC (Hexane/EtOAc = 40:1).to afford **3ua** as colourless oil (21.0 mg, 41%).

**HRMS (ESI):** *m/z* [M+H]<sup>+</sup> Calculated for [C<sub>12</sub>H<sub>14</sub>F<sub>3</sub>O<sub>2</sub>]<sup>+</sup>: 247.0946; Found: 247.0953.

**<sup>1</sup>H NMR (400 MHz, CDCl<sub>3</sub>)** δ 7.40–7.32 (m, 5H), 5.13 (s, 2H), 2.46 (t, *J* = 7.3 Hz, 2H), 2.19–2.09 (m, 2H), 1.95–1.88 (m, 2H). **<sup>13</sup>C NMR (101 MHz, CDCl<sub>3</sub>)** δ 172.4, 135.9, 128.8, 128.5, 128.4, 66.6, 33.2, 32.9, 17.5. **<sup>19</sup>F NMR (376 MHz, CDCl<sub>3</sub>)** δ -66.29.

### 8.25. benzyl 4-phenylbutanoate (3va)

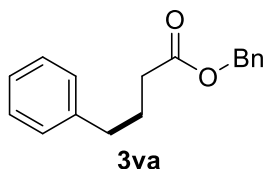

$C_{17}H_{18}O_2$   
M. W. 254.1307 g/mol

Following General Procedure **GP6** for the title compound **3va**, by using **1v** (61.0 mg, 0.2 mmol, 1.0 equiv), **2a** (97.0 mg, 0.6 mmol, 3.0 equiv), HE (101.0 mg, 0.4 mmol, 2.0 equiv) and [*fac*-Ir(ppy)<sub>3</sub>] (1.3 mg, 0.002 mmol, 1 mol%), in THF for 12 h at 45 °C. Purification was carried out by PTLC (Hexane/EtOAc = 40:1).to afford **3va** as colourless oil (27.0 mg, 53%).

**HRMS (ESI):** *m/z* [M+H]<sup>+</sup> Calculated for [C<sub>17</sub>H<sub>19</sub>O<sub>2</sub>]<sup>+</sup>: 255.1385; Found: 255.1393.

**<sup>1</sup>H NMR (400 MHz, CDCl<sub>3</sub>)** δ 7.39–7.33 (m, 5H), 7.30–7.26 (m, 3H), 7.21–7.14 (m, 2H), 5.11 (s, 2H), 2.66–2.63 (m, 2H), 2.38 (t, *J* = 7.5 Hz, 2H), 2.02–1.94 (m, 2H). **<sup>13</sup>C NMR (101 MHz, CDCl<sub>3</sub>)** δ 173.4, 141.4, 136.1, 128.7, 128.6, 128.5, 128.3 (2C), 126.1, 66.3, 35.2, 33.7, 26.6.

### 8.26. benzyl 2-(spiro[4.5]decan-6-yl)acetate(3l')

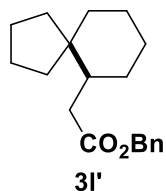

$C_{19}H_{26}O_2$   
M. W. 286.1933 g/mol

Following General Procedure **GP7** for the title compound **3l'**, by using **2l** (48.3 mg, 0.1 mmol, 1.0 equiv), HE (51.0 mg, 0.2 mmol, 2.0 equiv) and [*fac*-Ir(ppy)<sub>3</sub>] (0.7 mg, 0.001 mmol, 1 mol%), in THF for 24 h at 45 °C. Purification was carried out by PTLC (Hexane/EtOAc = 40:1).to afford **3l'** as colourless oil (15.0 mg, 54%).

**HRMS (ESI):** *m/z* [M+H]<sup>+</sup> Calculated for [C<sub>19</sub>H<sub>27</sub>O<sub>2</sub>]<sup>+</sup>: 287.2011; Found: 287.2010.



**<sup>1</sup>H NMR (400 MHz, CDCl<sub>3</sub>)** δ 7.39–7.29 (m, 5H), 5.10 (s, 2H), 2.46 (dd, *J* = 15.0, 3.3 Hz, 1H), 2.14 (dd, *J* = 15.0, 10.6 Hz, 1H), 1.84 (tt, *J* = 10.5, 3.3 Hz, 1H), 1.62–1.58 (m, 1H), 1.54–1.49 (m, 4H), 1.46–1.39 (m, 3H), 1.38–1.21 (m, 7H), 1.18–1.10 (m, 1H). **<sup>13</sup>C NMR (101 MHz, CDCl<sub>3</sub>)** δ 174.2, 136.3, 128.7, 128.3, 128.3, 66.2, 45.5, 42.2, 38.6, 36.2, 32.9, 29.5, 25.9, 25.5, 25.3, 24.6, 23.2.

#### 8.27. benzyl 2-(spiro[4.5]decan-1-yl)acetate (**3m'**)

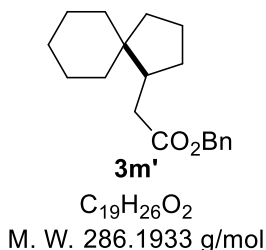

Following General Procedure **GP7** for the title compound **3m'**, by using **2m** (48.3 mg, 0.1 mmol, 1.0 equiv), HE (51.0 mg, 0.2 mmol, 2.0 equiv) and [*fac*-Ir(ppy)<sub>3</sub>] (0.7 mg, 0.001 mmol, 1 mol%), in THF for 24 h at 45 °C. Purification was carried out by PTLC (Hexane/EtOAc = 40:1).to afford **3m'** as colourless oil (17.0 mg, 60%).

**HRMS (ESI):** *m/z* [M+H]<sup>+</sup> Calculated for [C<sub>19</sub>H<sub>27</sub>O<sub>2</sub>]<sup>+</sup>: 287.2011; Found: 287.2010.

**<sup>1</sup>H NMR (400 MHz, CDCl<sub>3</sub>)** δ 7.36–7.29 (m, 5H), 5.10 (s, 2H), 2.44 (dd, *J* = 14.6, 3.6 Hz, 1H), 2.11 (dd, *J* = 14.7, 10.6 Hz, 1H), 1.90–1.82 (m, 2H), 1.74–1.67 (m, 1H), 1.60–1.48 (m, 6H), 1.36–1.26 (m, 6H), 1.14–1.07 (m, 1H), 1.00 (td, *J* = 12.6, 3.9 Hz, 1H). **<sup>13</sup>C NMR (101 MHz, CDCl<sub>3</sub>)** δ 174.2, 136.2, 128.6, 128.3, 128.3, 66.2, 46.6, 44.3, 37.4, 35.3, 34.9, 30.4, 30.2, 26.6, 24.0, 22.7, 21.5.

#### 8.28. ethyl 2-((1-tosylpiperidin-4-yl)methyl)acrylate (**5aa**)

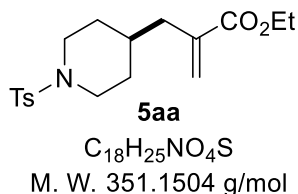

Following General Procedure **GP6** for the title compound **5aa**, by using **1a** (87.0 mg, 0.2 mmol, 1.0 equiv), **4a** (152.0 mg, 0.6 mmol, 3.0 equiv), HE (101.0 mg, 0.4 mmol, 2.0 equiv) and [*fac*-Ir(ppy)<sub>3</sub>] (1.3 mg, 0.002 mmol, 1 mol%), in THF for 12 h at 45 °C. Purification was carried out by PTLC (Hexane/EtOAc = 7:3).to afford **5aa** as colourless oil (42.0 mg, 60%).

**HRMS (ESI):** *m/z* [M+H]<sup>+</sup> Calculated for [C<sub>18</sub>H<sub>26</sub>NO<sub>4</sub>S]<sup>+</sup>: 352.1583; Found: 352.1587.

**<sup>1</sup>H NMR (400 MHz, CDCl<sub>3</sub>)** δ 7.63–7.60 (m, 2H), 7.31–7.29 (m, 2H), 6.15 (d, *J* = 1.7 Hz, 1H), 5.47 (d, *J* = 1.4 Hz, 1H), 4.14 (q, *J* = 7.2 Hz, 2H), 3.77–3.72 (m, 2H), 2.42 (s, 3H), 2.21–2.19 (m, 3H), 2.18–2.14 (m, 2H), 1.72–1.67 (m, 2H), 1.44–1.34 (m, 1H), 1.32–1.29 (m, 1H), 1.26 (t, *J* = 7.2 Hz, 3H). **<sup>13</sup>C NMR (101 MHz, CDCl<sub>3</sub>)** δ 167.1, 143.5, 138.3, 133.1, 129.7, 127.8, 126.7, 60.8, 46.5, 38.9, 34.2, 31.3, 21.6, 14.3.

#### 8.29. 2-((1-tosylpiperidin-4-yl)methyl)acrylic acid (**5ab**)

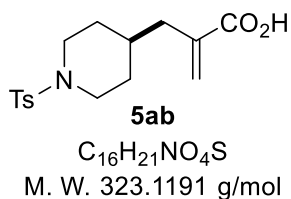

Following General Procedure **GP6** for the title compound **5ab**, by using **1a** (87.0 mg, 0.2 mmol, 1.0 equiv), **4b** (135.6 mg, 0.6 mmol, 3.0 equiv), HE (101.0 mg, 0.4 mmol, 2.0 equiv) and [*fac*-Ir(ppy)<sub>3</sub>] (1.3 mg, 0.002 mmol, 1 mol%), in THF for 12 h at 45 °C. Purification was carried out by PTLC (Hexane/EtOAc = 3:7).to afford **5ab** as white solid (42.0 mg, 65%).

**HRMS (ESI):**  $m/z$  [M+H]<sup>+</sup> Calculated for [C<sub>16</sub>H<sub>22</sub>NO<sub>4</sub>S]<sup>+</sup>: 324.1270; Found: 324.1277.

**<sup>1</sup>H NMR (400 MHz, CDCl<sub>3</sub>)** δ 10.53 (s, broad, 1H), 7.63–7.61 (m, 2H), 7.32–7.30 (m, 2H), 6.29 (d, *J* = 1.4 Hz, 1H), 5.61 (d, *J* = 1.3 Hz, 1H), 3.77–3.75 (m, 2H), 2.43 (s, 3H), 2.21–2.20 (m, 2H), 2.18–2.15 (m, 1H), 1.72–1.69 (m, 3H), 1.43–1.40 (m, 1H), 1.33–1.29 (m, 2H). **<sup>13</sup>C NMR (101 MHz, CDCl<sub>3</sub>)** δ 170.6, 143.6, 137.2, 133.1, 129.7, 129.3, 127.9, 46.5, 38.7, 34.1, 31.3, 21.7.

### 8.30. ethyl 4-cyclohexyl-4-methyl-2-methylenepentanoate (5fa)

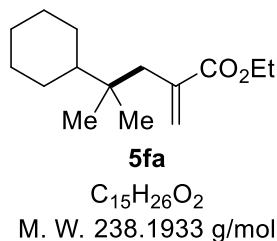

Following General Procedure **GP6** for the title compound **5fa**, by using **1f** (65.0 mg, 0.2 mmol, 1.0 equiv), **4a** (152.0 mg, 0.6 mmol, 3.0 equiv), HE (101.0 mg, 0.4 mmol, 2.0 equiv) and [*fac*-Ir(ppy)<sub>3</sub>] (1.3 mg, 0.002 mmol, 1 mol%), in THF for 12 h at 45 °C. Purification was carried out by PTLC (Hexane/EtOAc = 40:1).to afford **5fa** as colourless oil (34.0 mg, 71%).

**HRMS (ESI):**  $m/z$  [M+H]<sup>+</sup> Calculated for [C<sub>15</sub>H<sub>27</sub>O<sub>2</sub>]<sup>+</sup>: 239.2011; Found: 239.2034.

**<sup>1</sup>H NMR (400 MHz, CDCl<sub>3</sub>)** δ 6.15 (d, *J* = 1.8 Hz, 1H), 5.41 (d, *J* = 1.7 Hz, 1H), 4.19 (q, *J* = 7.3 Hz, 2H), 2.31 (s, 2H), 1.80–1.74 (m, 4H), 1.67–1.60 (m, 2H), 1.29 (t, *J* = 7.1 Hz, 3H), 1.21–1.13 (m, 2H), 1.10–1.05 (m, 1H), 1.01–0.94 (m, 2H), 0.75 (s, 6H). **<sup>13</sup>C NMR (101 MHz, CDCl<sub>3</sub>)** δ 168.7, 139.5, 126.9, 60.8, 47.3, 40.3, 36.4, 27.5, 27.3, 26.9, 24.1, 14.3.

### 8.31. ethyl 4-methyl-2-methylene-5-phenylpentanoate (5la)

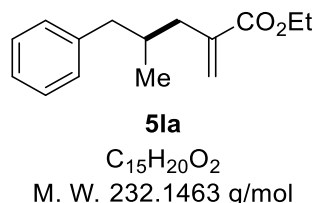

Following General Procedure **GP6** for the title compound **5la**, by using **1l** (64.0 mg, 0.2 mmol, 1.0 equiv), **4a** (152.0 mg, 0.6 mmol, 3.0 equiv), HE (101.0 mg, 0.4 mmol, 2.0 equiv) and [*fac*-Ir(ppy)<sub>3</sub>] (1.3 mg, 0.002 mmol, 1 mol%), in THF for 12 h at 45 °C. Purification was carried out by PTLC (Hexane/EtOAc = 40:1).to afford **5la** as colourless oil (32.0 mg, 69%).

**HRMS (ESI):**  $m/z$  [M+H]<sup>+</sup> Calculated for [C<sub>15</sub>H<sub>21</sub>O<sub>2</sub>]<sup>+</sup>: 233.1542; Found: 233.1559.

**<sup>1</sup>H NMR (400 MHz, CDCl<sub>3</sub>)** δ 7.29–7.25 (m, 2H), 7.20–7.14 (m, 3H), 6.19 (d, *J* = 1.7 Hz, 1H), 5.51 (d, *J* = 1.5 Hz, 1H), 4.23–4.15 (m, 2H), 2.71–2.66 (m, 1H), 2.45–2.35 (m, 2H), 2.13–2.08 (m, 1H), 2.04–1.95 (m, 1H), 1.29 (t, *J* = 7.1 Hz, 3H), 0.83 (d, *J* = 6.5 Hz, 3H). **<sup>13</sup>C NMR (101 MHz, CDCl<sub>3</sub>)** δ 167.5, 141.1, 139.8, 129.3, 128.2, 126.0, 125.9, 60.7, 43.5, 39.5, 34.1, 19.1, 14.3.

### 8.32. ethyl 2-methylene-5-phenylpentanoate (**5qa**)

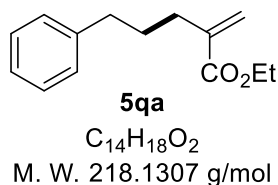

Following General Procedure **GP6** for the title compound **5qa**, by using **1q** (61.0 mg, 0.2 mmol, 1.0 equiv), **4a** (152.0 mg, 0.6 mmol, 3.0 equiv), HE (101.0 mg, 0.4 mmol, 2.0 equiv) and [*fac*-Ir(ppy)<sub>3</sub>] (1.3 mg, 0.002 mmol, 1 mol%), in THF for 12 h at 45 °C. Purification was carried out by PTLC (Hexane/EtOAc = 40:1).to afford **5qa** as colourless oil (26.0 mg, 60%).

**HRMS (ESI):** *m/z* [M+H]<sup>+</sup> Calculated for [C<sub>14</sub>H<sub>19</sub>O<sub>2</sub>]<sup>+</sup>: 219.1385; Found: 219.1377.

**<sup>1</sup>H NMR (400 MHz, CDCl<sub>3</sub>)** δ 7.30–7.27 (m, 2H), 7.20–7.16 (m, 3H), 6.15 (d, *J* = 1.5 Hz, 1H), 5.53–5.52 (m, 1H), 4.20 (q, *J* = 6.9 Hz, 2H), 2.67–2.63 (m, 2H), 2.37–2.33 (m, 2H), 1.85–1.77 (m, 2H), 1.30 (t, *J* = 7.1 Hz, 3H). **<sup>13</sup>C NMR (101 MHz, CDCl<sub>3</sub>)** δ 167.4, 142.3, 140.8, 128.6, 128.5, 125.9, 124.7, 60.8, 35.6, 31.6, 30.2, 14.4.

### 8.33. ethyl 2-methylene-6-(pivaloyloxy)hexanoate (**5wa**)

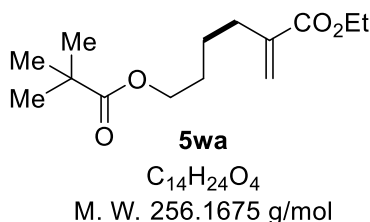

Following General Procedure **GP6** for the title compound **5wa**, by using **1w** (68.0 mg, 0.2 mmol, 1.0 equiv), **4a** (152.0 mg, 0.6 mmol, 3.0 equiv), HE (101.0 mg, 0.4 mmol, 2.0 equiv) and [*fac*-Ir(ppy)<sub>3</sub>] (1.3 mg, 0.002 mmol, 1 mol%), in THF for 12 h at 45 °C. Purification was carried out by PTLC (Hexane/EtOAc = 40:1).to afford **5wa** as colourless oil (31.0 mg, 60%).

**HRMS (ESI):** *m/z* [M+H]<sup>+</sup> Calculated for [C<sub>14</sub>H<sub>25</sub>O<sub>4</sub>]<sup>+</sup>: 257.1753; Found: 257.1753.

**<sup>1</sup>H NMR (400 MHz, CDCl<sub>3</sub>)** δ 6.15 (d, *J* = 1.5 Hz, 1H), 5.52 (q, *J* = 1.5 Hz, 1H), 4.20 (q, *J* = 7.1 Hz, 2H), 4.06 (t, *J* = 6.4 Hz, 2H), 2.34 (t, *J* = 7.7 Hz, 2H), 1.68–1.62 (m, 2H), 1.57–1.52 (m, 2H), 1.30 (t, *J* = 7.3 Hz, 3H), 1.19 (s, 9H). **<sup>13</sup>C NMR (101 MHz, CDCl<sub>3</sub>)** δ 178.8, 167.3, 140.6, 124.7, 64.2, 60.8, 38.9, 31.6, 28.1, 27.4, 26.6, 14.6.

### 8.34. ethyl 6-((tert-butyldimethylsilyl)oxy)-2-methylenehexanoate (**5xa**)

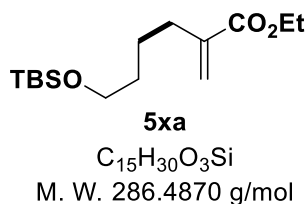

Following General Procedure **GP6** for the title compound **5xa**, by using **1x** (74.0 mg, 0.2 mmol, 1.0 equiv), **4a** (152.0 mg, 0.6 mmol, 3.0 equiv), HE (101.0 mg, 0.4 mmol, 2.0 equiv) and [*fac*-Ir(ppy)<sub>3</sub>] (1.3 mg, 0.002 mmol, 1 mol%), in THF for 12 h at 45 °C. Purification was carried out by PTLC (Hexane/EtOAc = 40:1).to afford **5xa** as colourless oil (33.0 mg, 58%).

**HRMS (ESI):** *m/z* [M+H]<sup>+</sup> Calculated for [C<sub>15</sub>H<sub>31</sub>O<sub>3</sub>Si]<sup>+</sup>: 287.2042; Found: 287.2046.

**<sup>1</sup>H NMR (400 MHz, CDCl<sub>3</sub>)** δ 6.14 (d, *J* = 1.5 Hz, 1H), 5.52 (q, *J* = 1.6 Hz, 1H), 4.20 (q, *J* = 7.0 Hz, 2H), 3.62 (t, *J* = 5.9 Hz, 2H), 2.31 (t, *J* = 6.4 Hz, 2H), 1.54–1.51 (m, 2H), 1.30 (t, *J* = 7.1 Hz, 3H), 0.89 (s, 9H), 0.04 (s, 6H). **<sup>13</sup>C NMR (101 MHz, CDCl<sub>3</sub>)** δ 167.4, 141.0, 124.4, 63.1, 60.6, 32.4, 31.6, 26.0, 24.7, 18.4, 14.3, -5.2.

**8.35. methyl (R)-4-((2S,5S,8R,9S,10S,13R,14S,17R)-2-(2-(ethoxycarbonyl)allyl)-10,13-dimethylhexadecahydro-1H-cyclopenta[*a*]phenanthren-17-yl)pentanoate (**5ya**)**

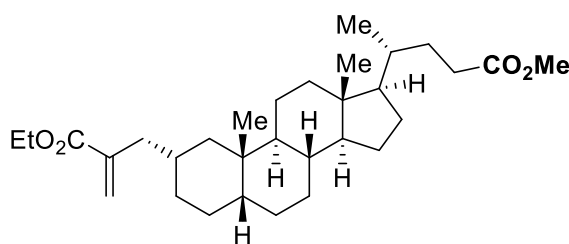

**5ya**

C<sub>31</sub>H<sub>50</sub>O<sub>4</sub>

M. W. 486.3709 g/mol

Following General Procedure **GP6** for the title compound **5ya**, by using **1y** (114.0 mg, 0.2 mmol, 1.0 equiv), **4a** (152.0 mg, 0.6 mmol, 3.0 equiv), HE (101.0 mg, 0.4 mmol, 2.0 equiv) and [*fac*-Ir(ppy)<sub>3</sub>] (1.3 mg, 0.002 mmol, 1 mol%), in THF for 12 h at 45 °C. Purification was carried out by PTLC (Hexane/EtOAc = 40:1).to afford **5ya** as colourless oil (63.0 mg, 65%).

**HRMS (ESI):** *m/z* [M+H]<sup>+</sup> Calculated for [C<sub>31</sub>H<sub>51</sub>O<sub>4</sub>]<sup>+</sup>: 487.3787; Found: 487.3788.

**<sup>1</sup>H NMR (400 MHz, CDCl<sub>3</sub>)** δ 6.14 (dd, *J* = 5.2, 1.8 Hz, 1H), 5.46 (s, 1H), 4.19 (q, *J* = 7.0 Hz, 2H), 3.66 (s, 3H), 2.40–2.37 (m, 2H), 2.36–2.31 (m, 1H), 2.23–2.18 (m, 1H), 2.00–1.92 (m, 3H), 1.86–1.75 (m, 3H), 1.53–1.45 (m, 4H), 1.42–1.33 (m, 7H), 1.29 (t, *J* = 7.1 Hz, 3H), 1.17–1.01 (m, 10H), 0.93 (s, 3H), 0.90 (d, *J* = 6.4 Hz, 3H), 0.64 (s, 3H). **<sup>13</sup>C NMR (101 MHz, CDCl<sub>3</sub>)** δ 174.9, 167.7, 140.5, 125.4, 60.6, 56.7, 56.0, 51.6, 42.8, 40.3, 40.1, 37.4, 35.8, 35.5, 35.5, 34.3, 32.4, 31.1, 31.1, 30.0, 29.8, 28.3, 27.3, 26.4, 24.3, 24.3, 24.1, 21.0, 18.4, 14.3, 12.1.

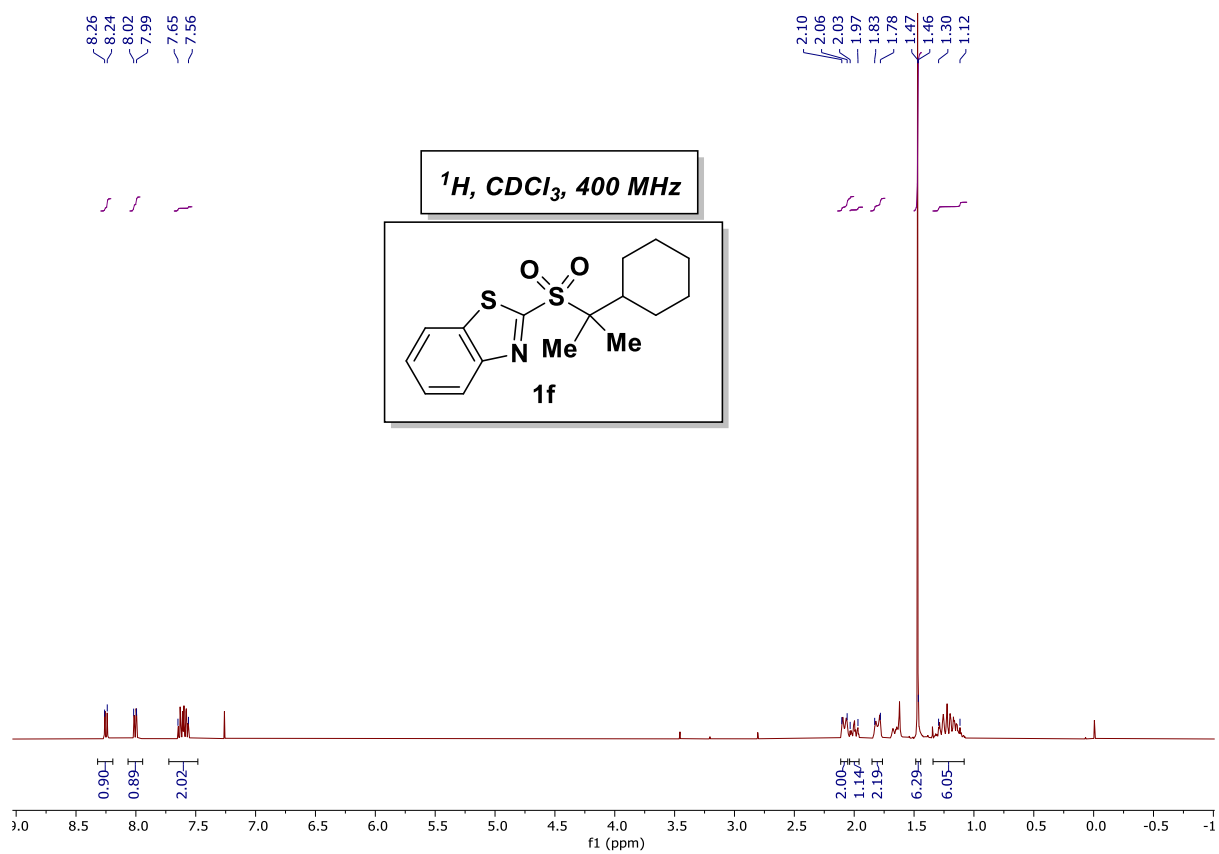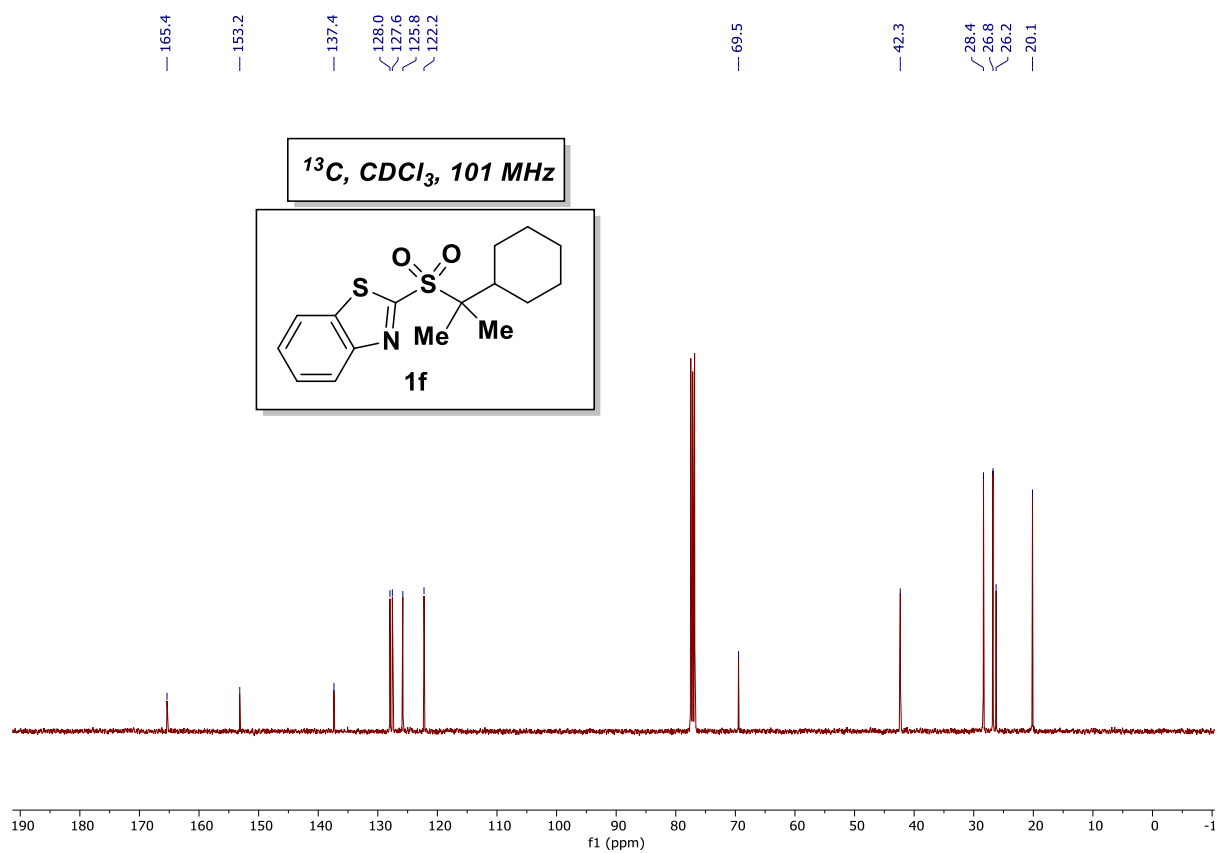

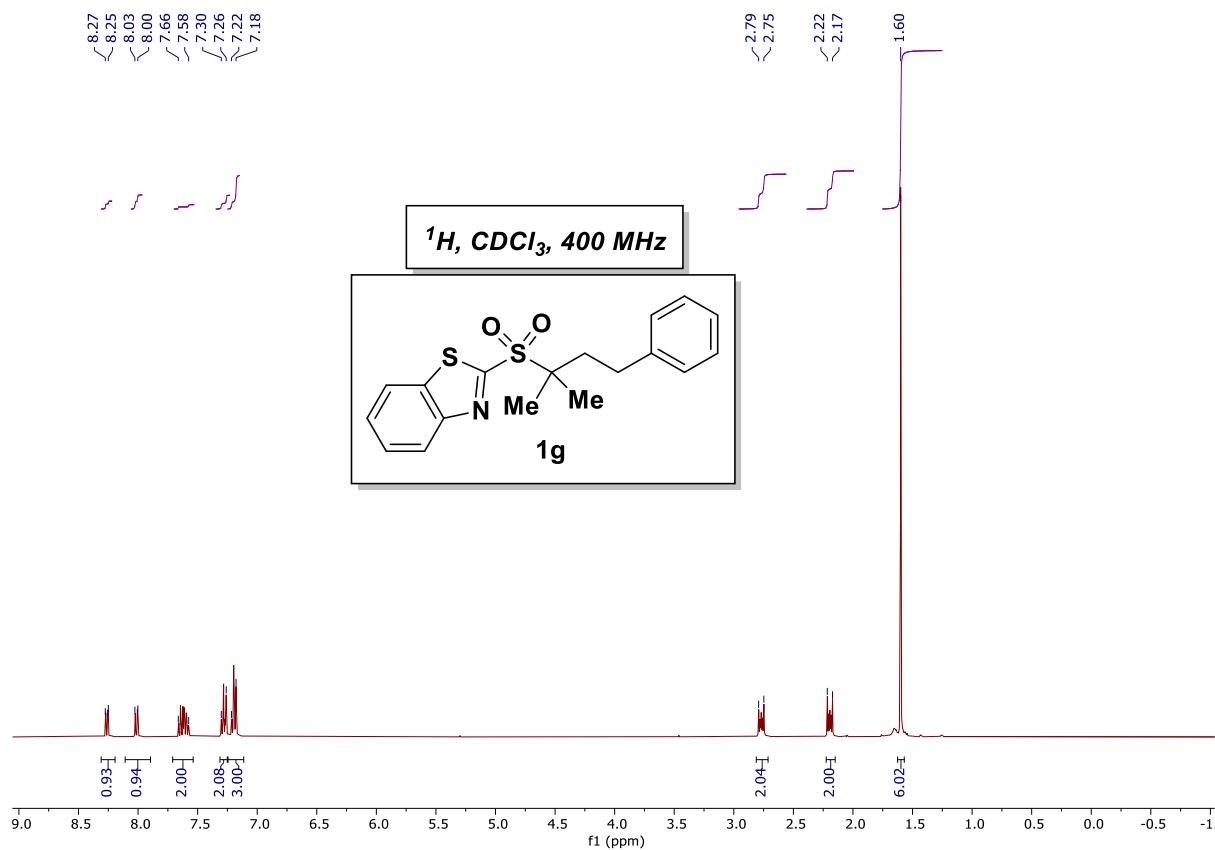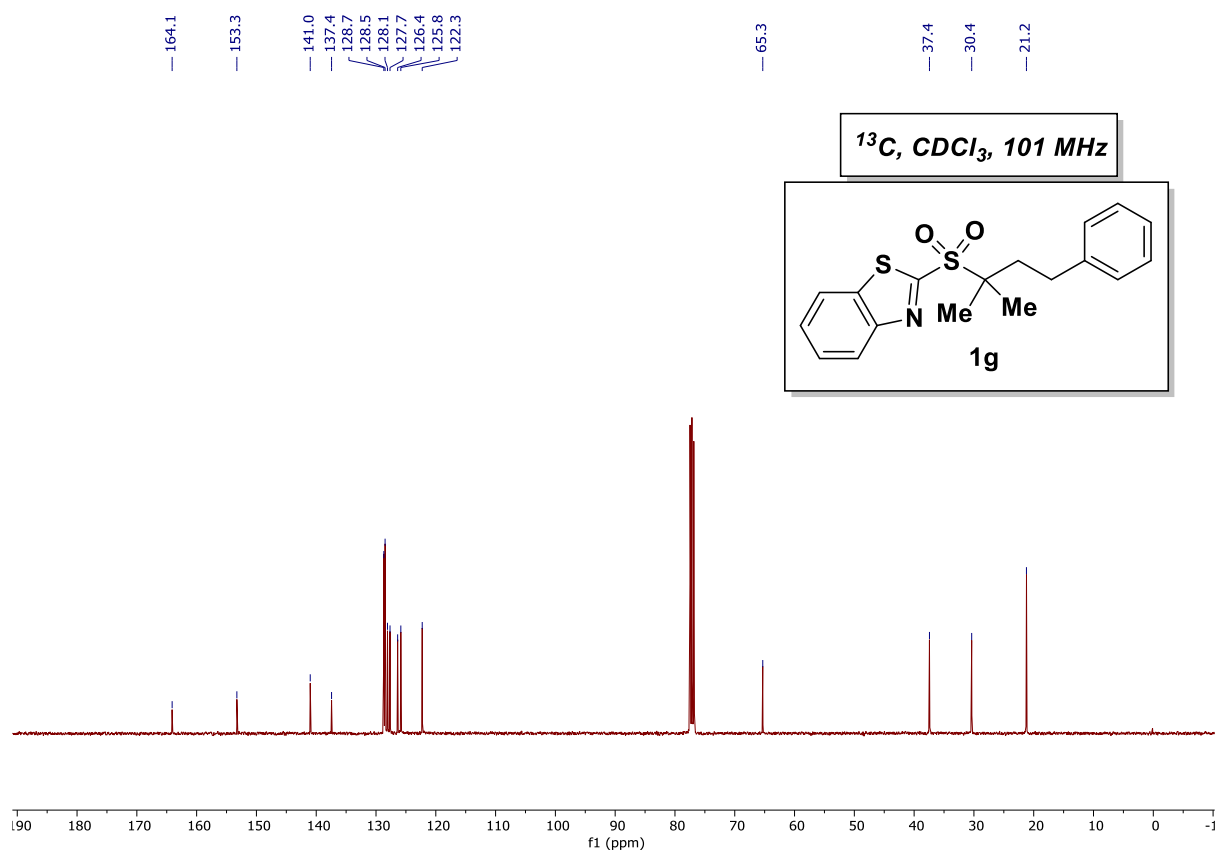

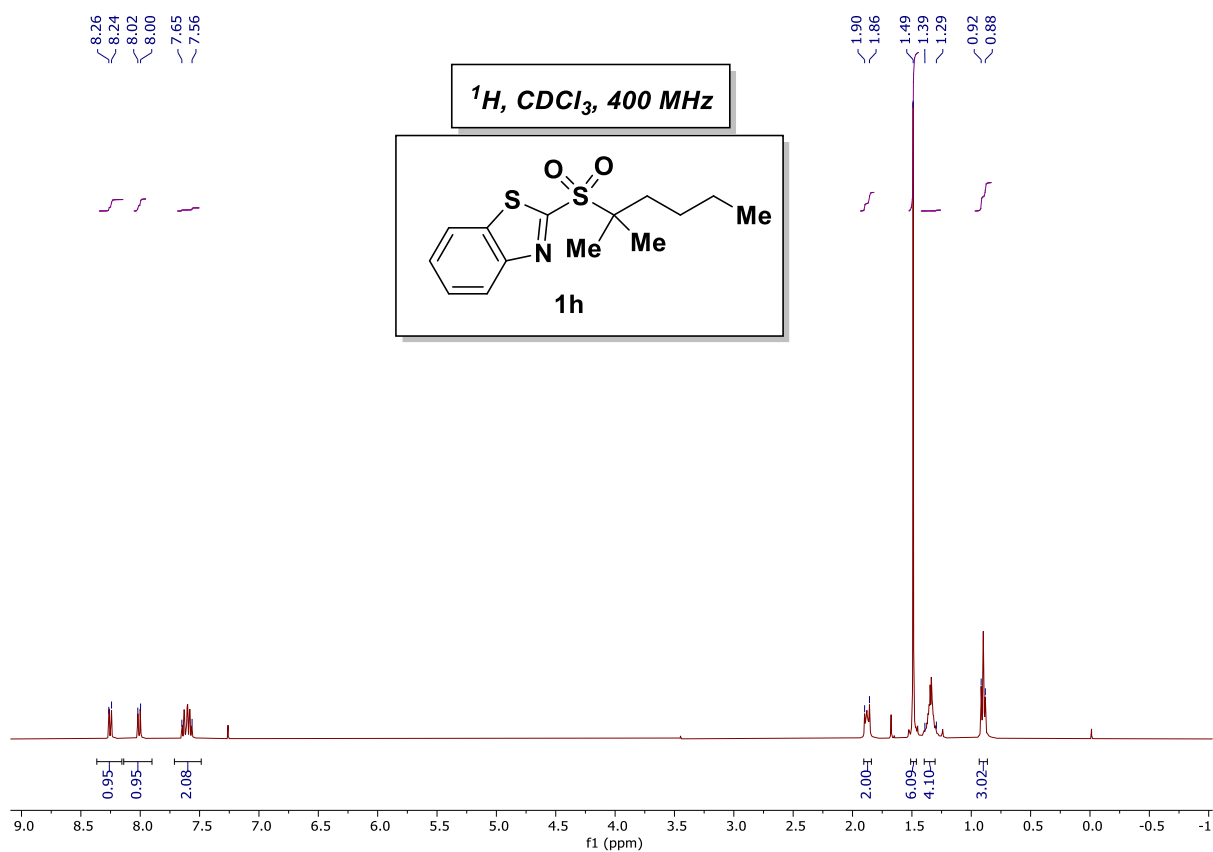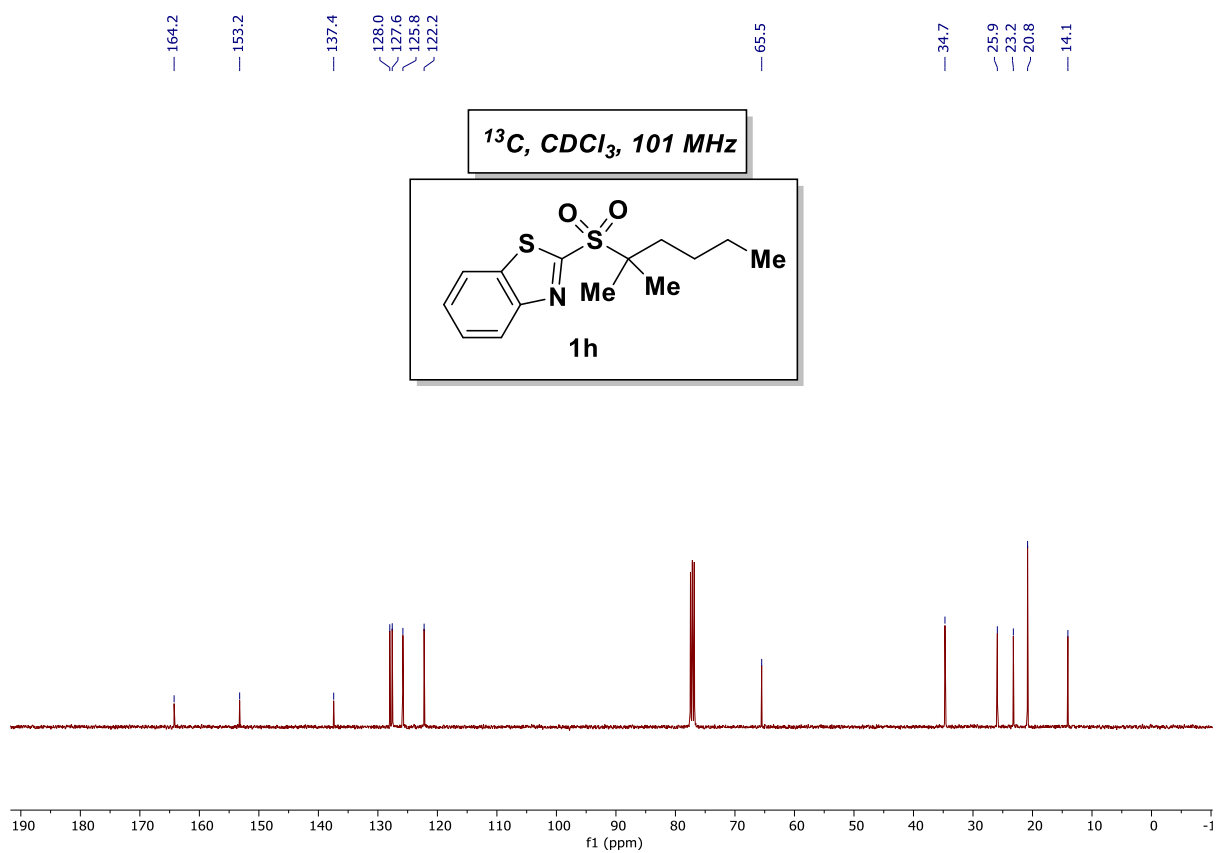

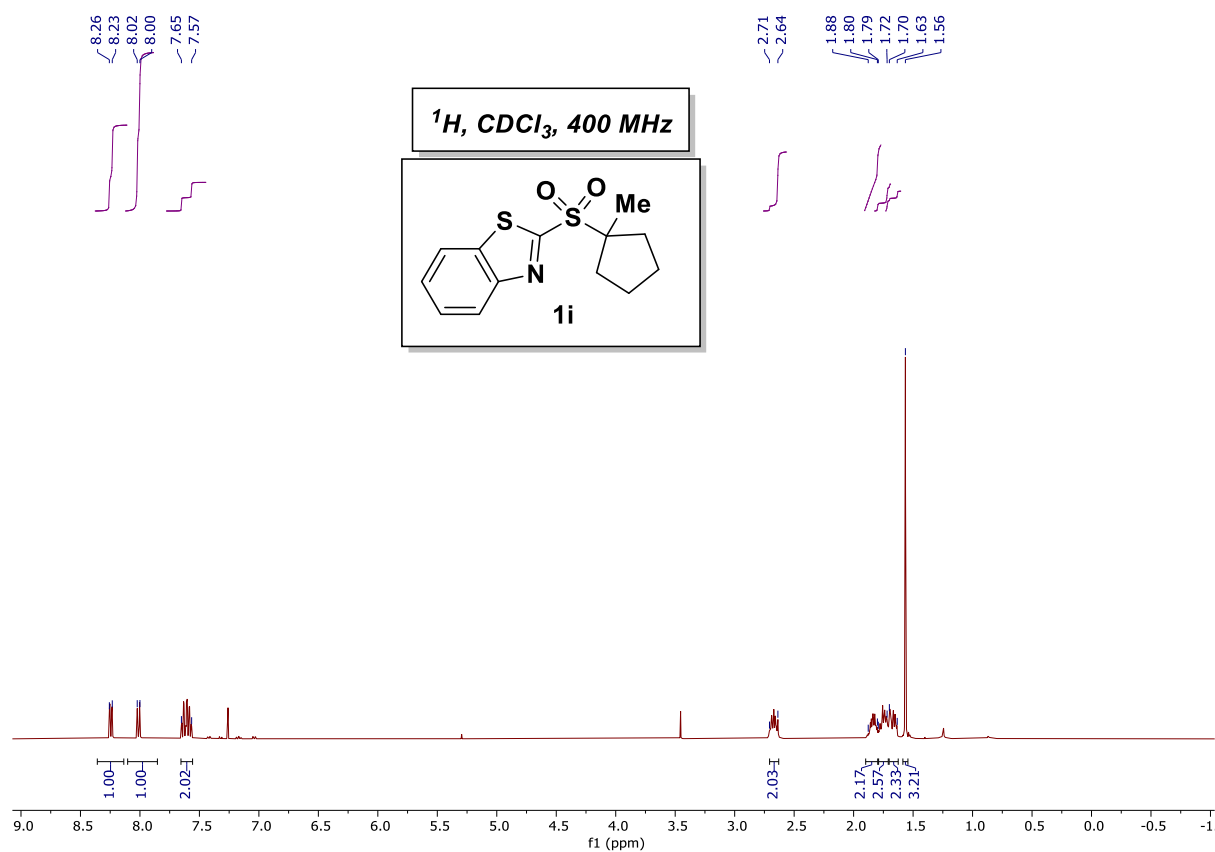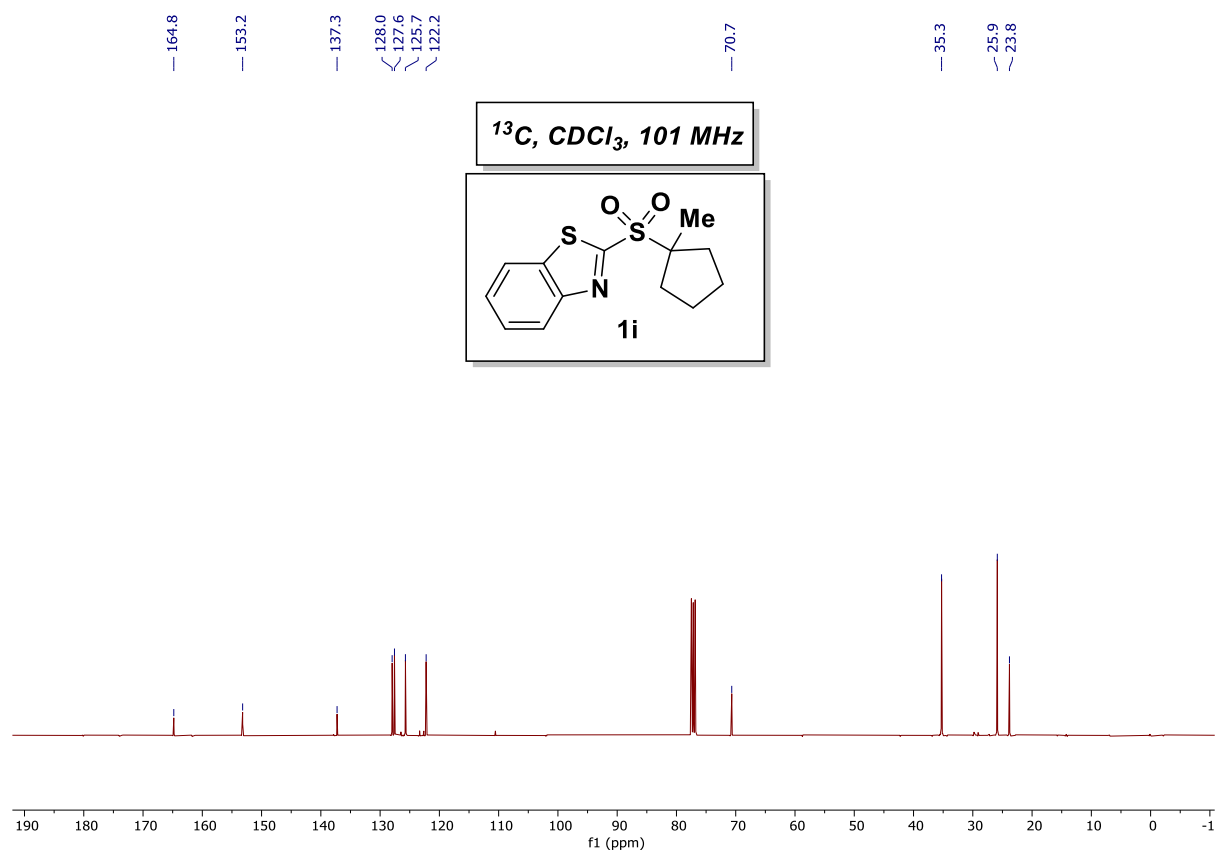



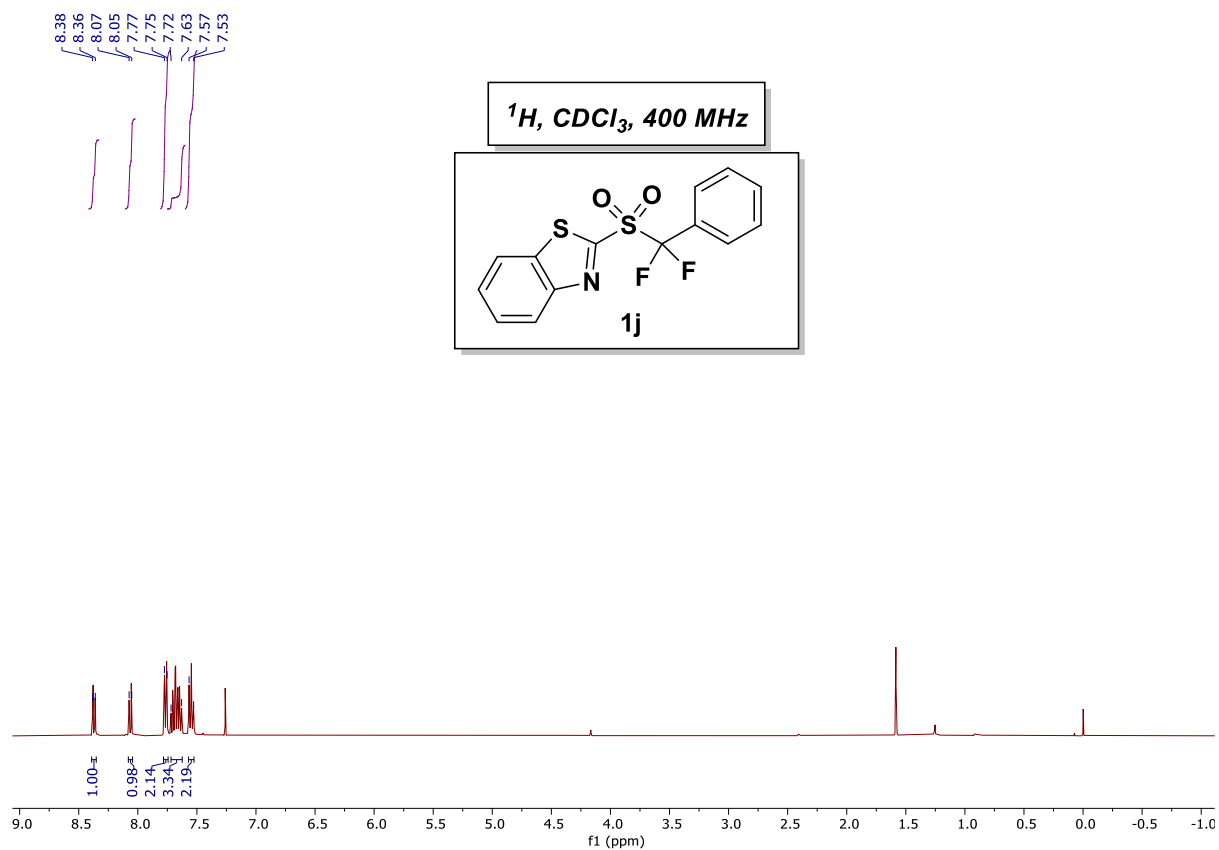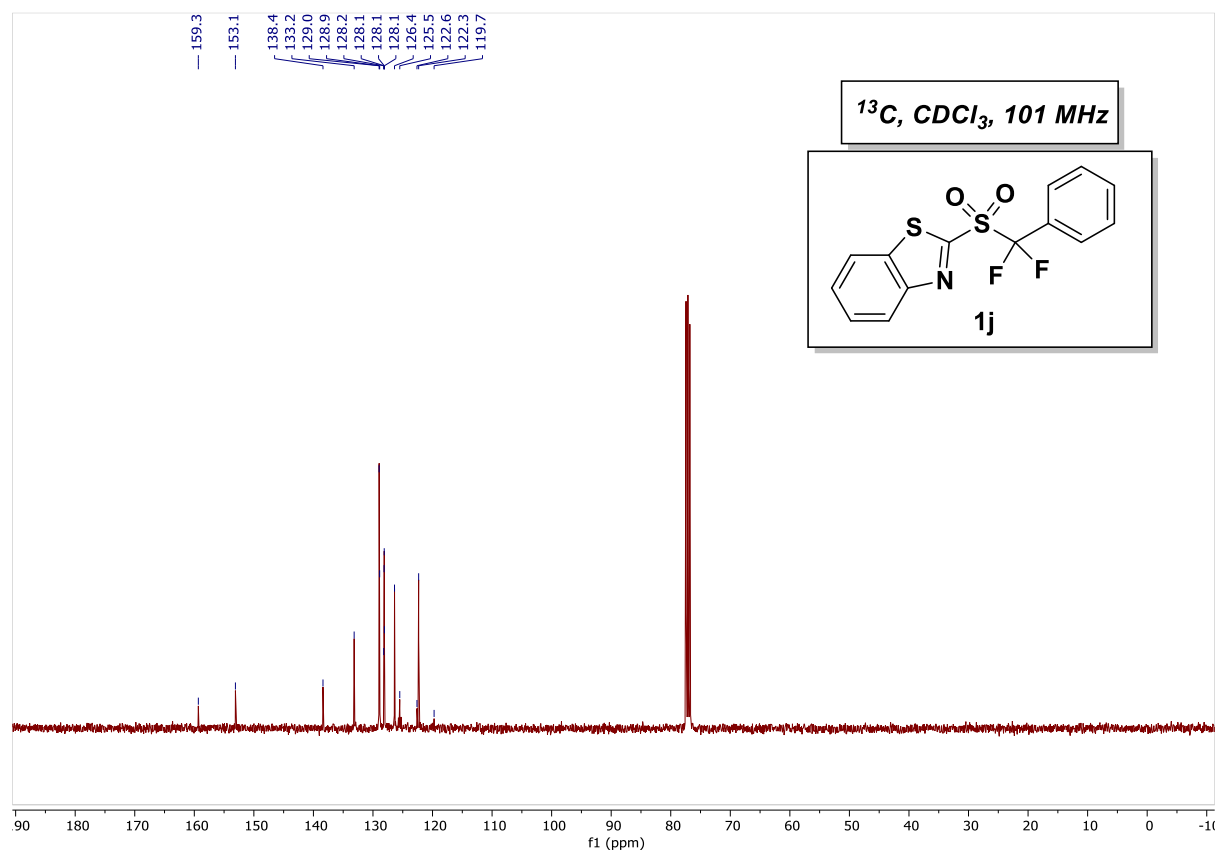

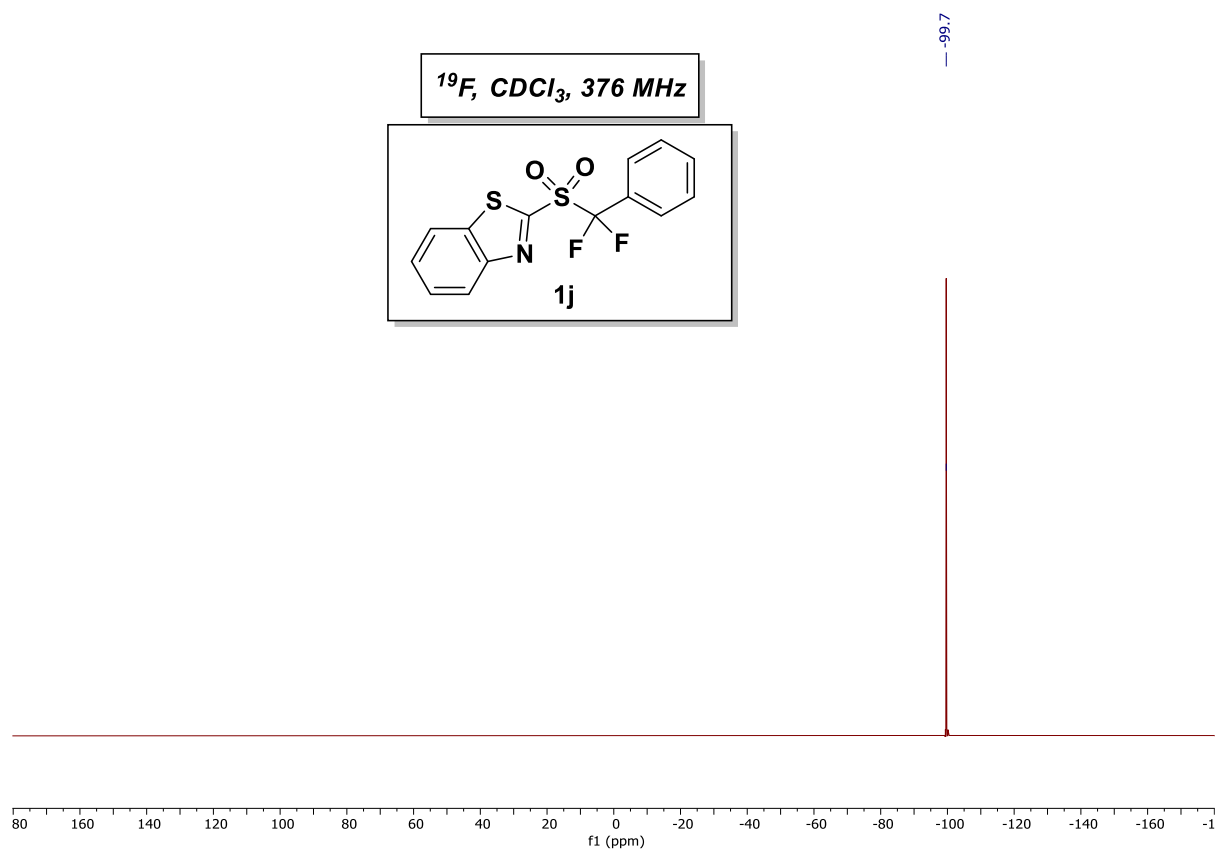

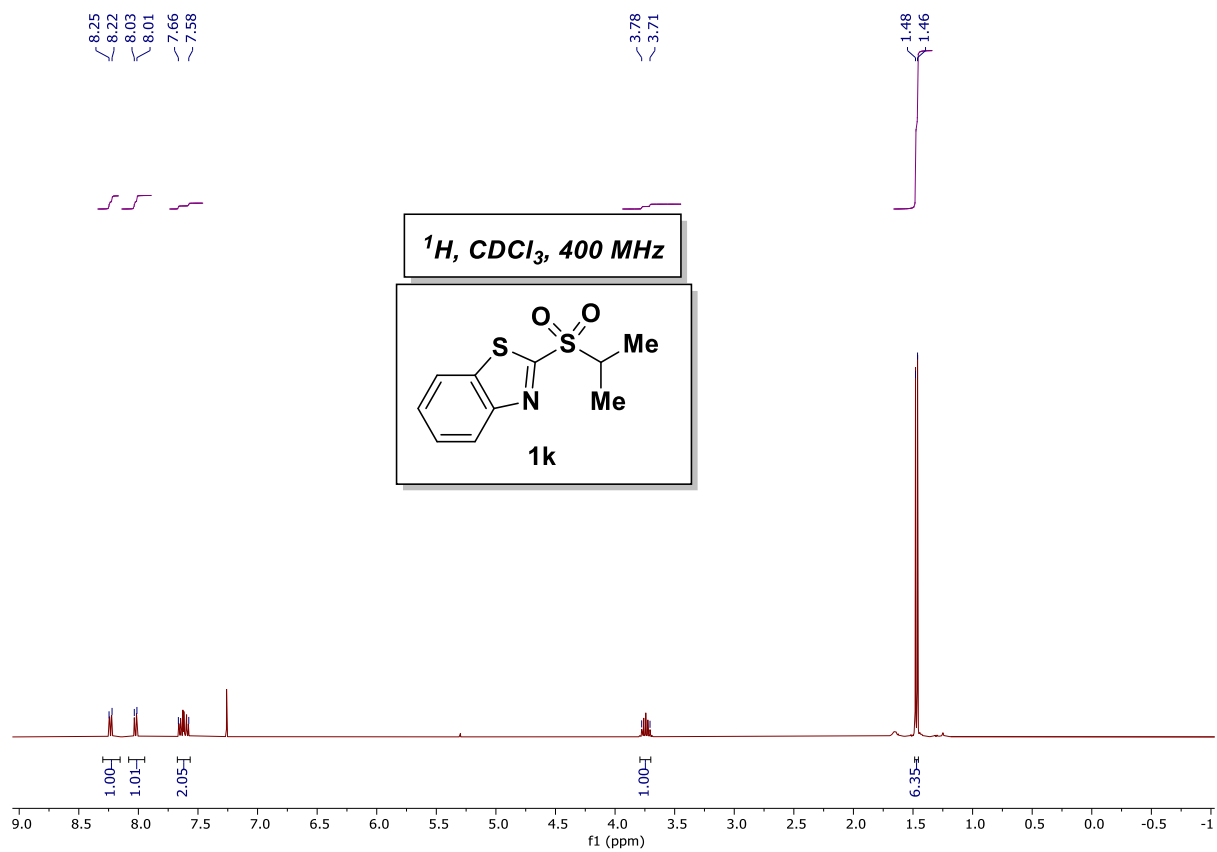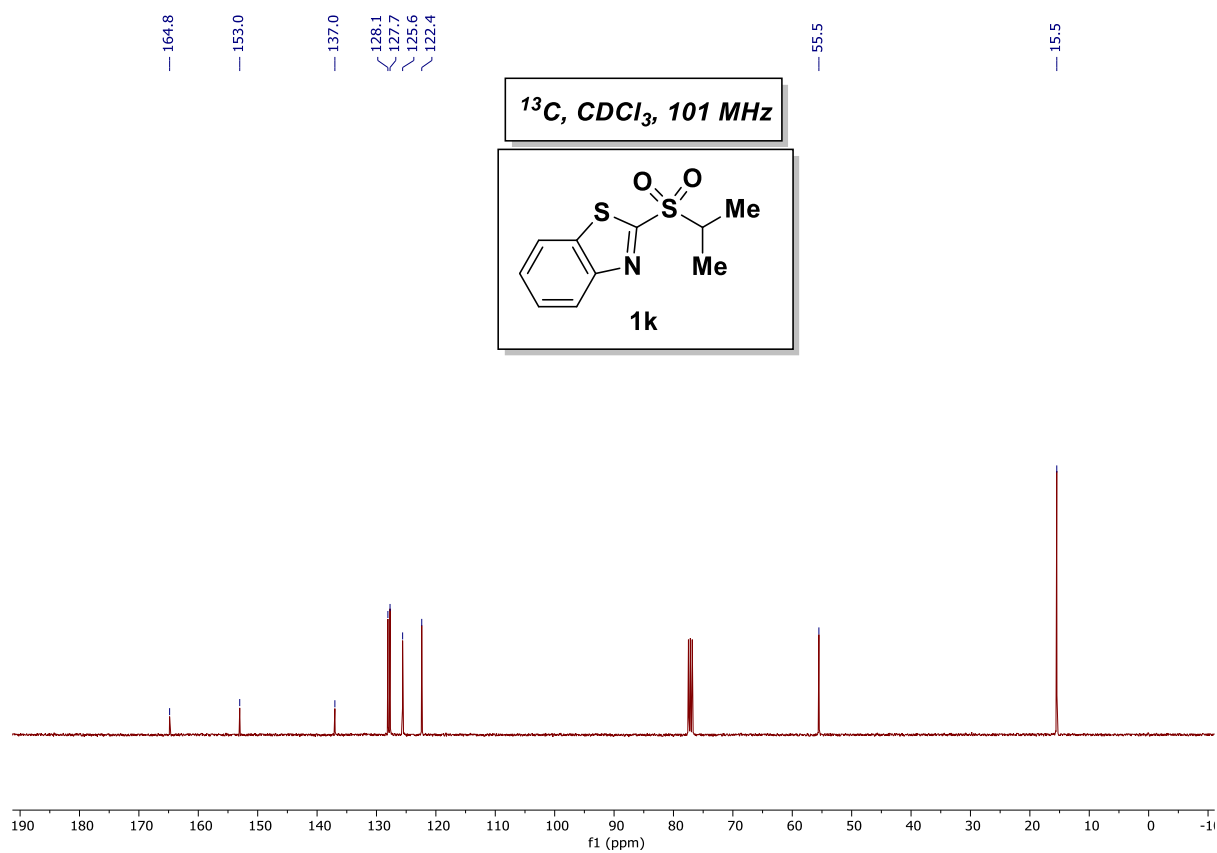



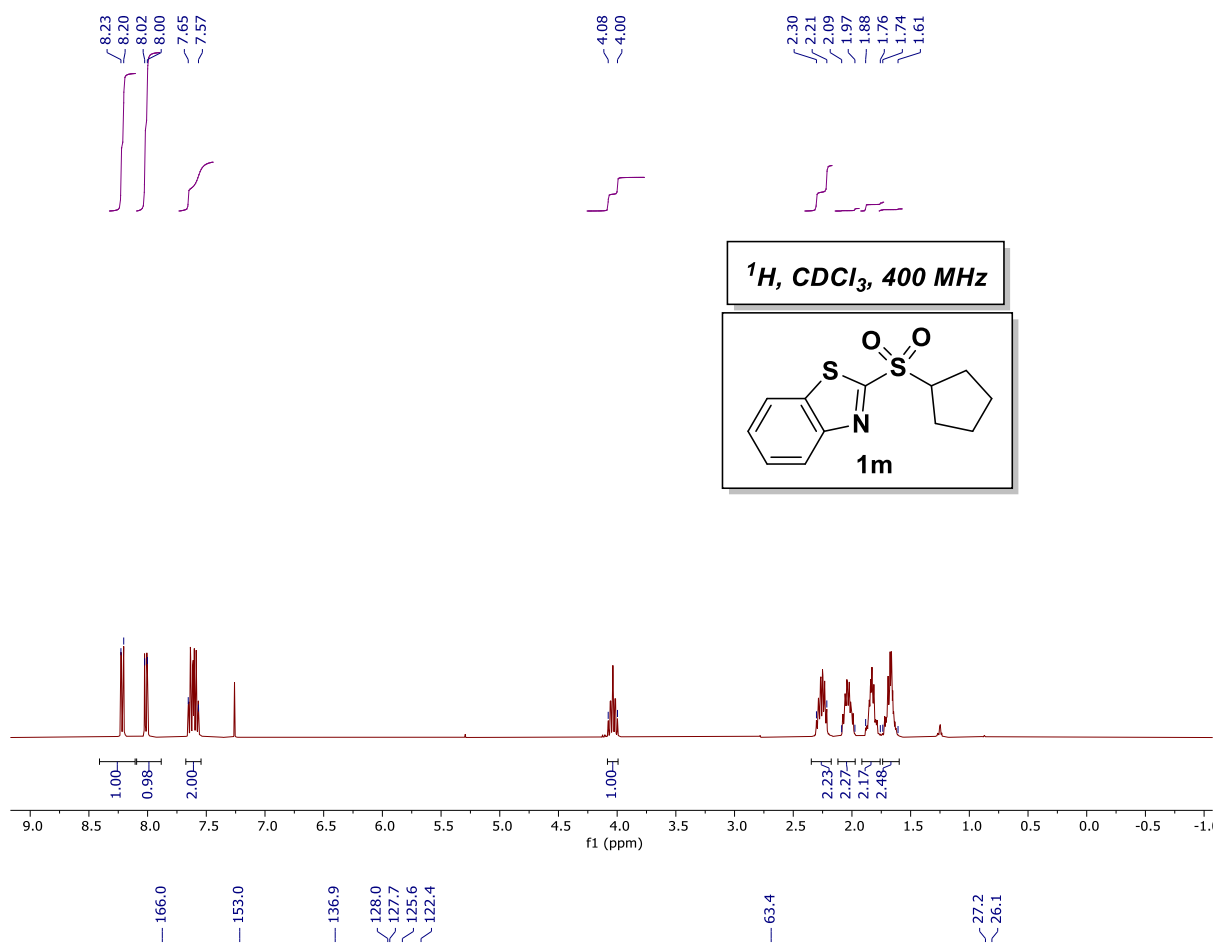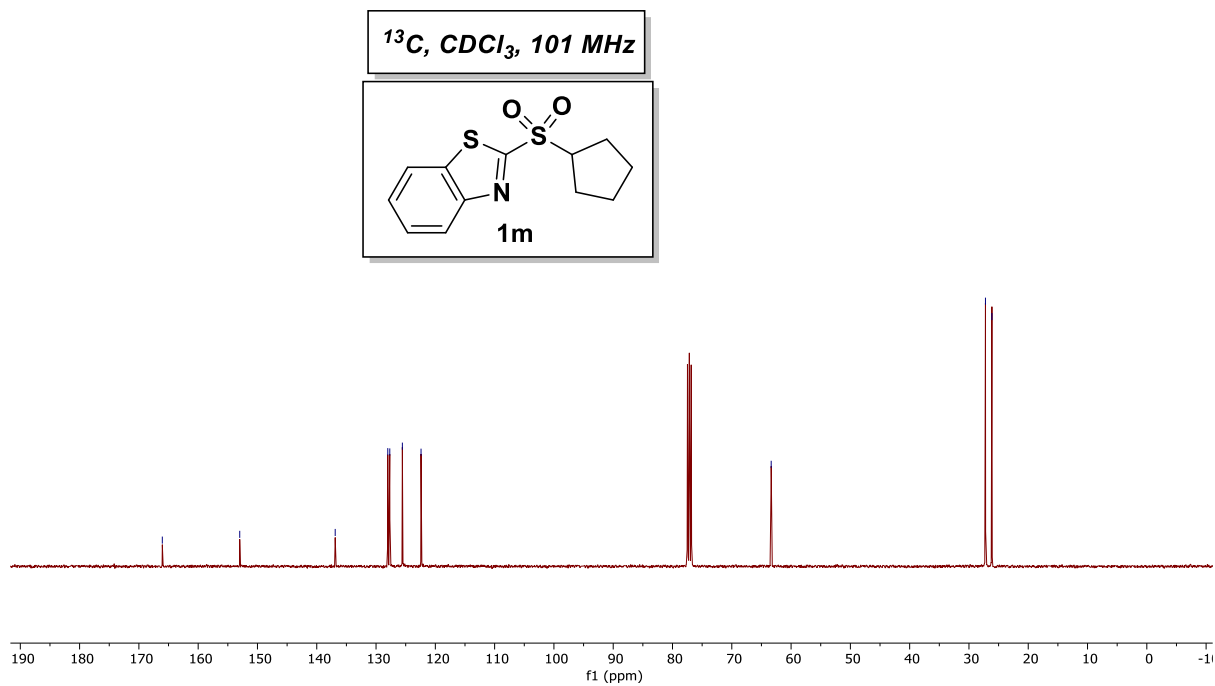

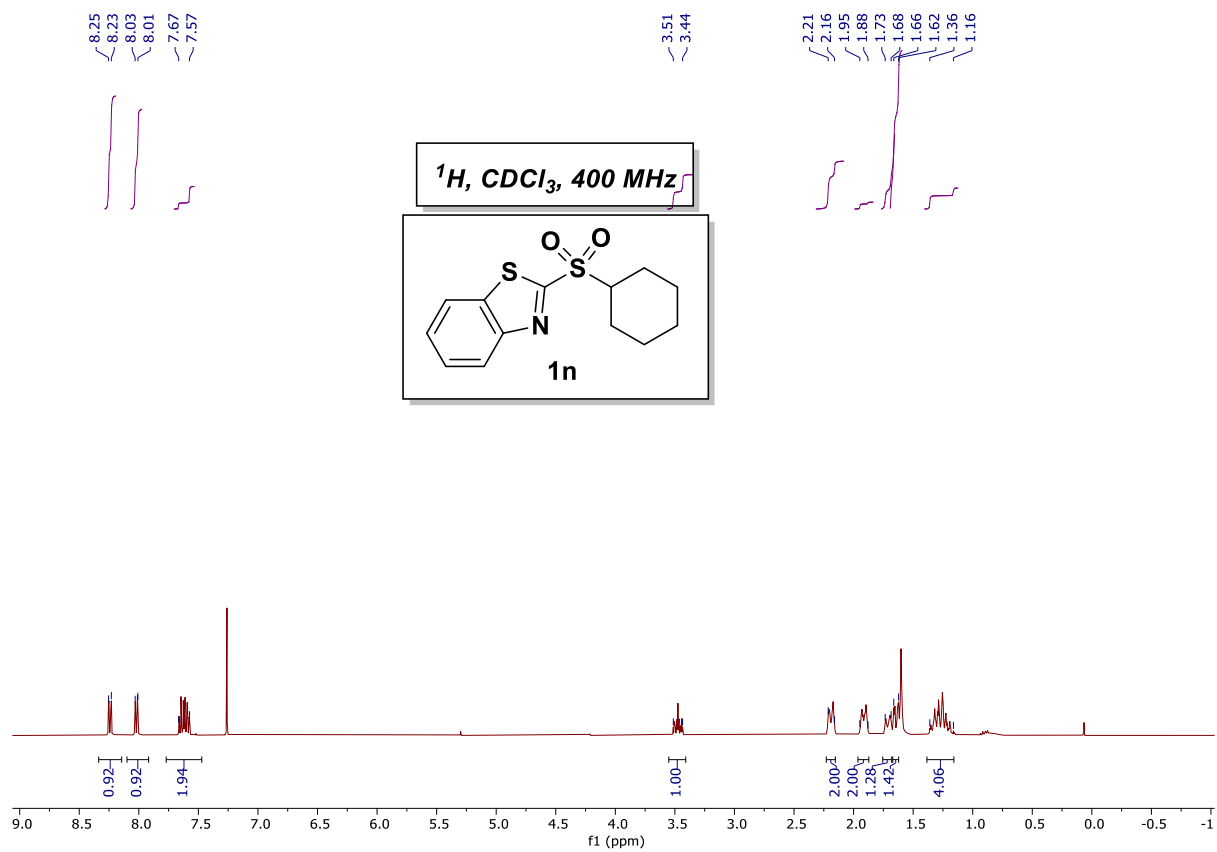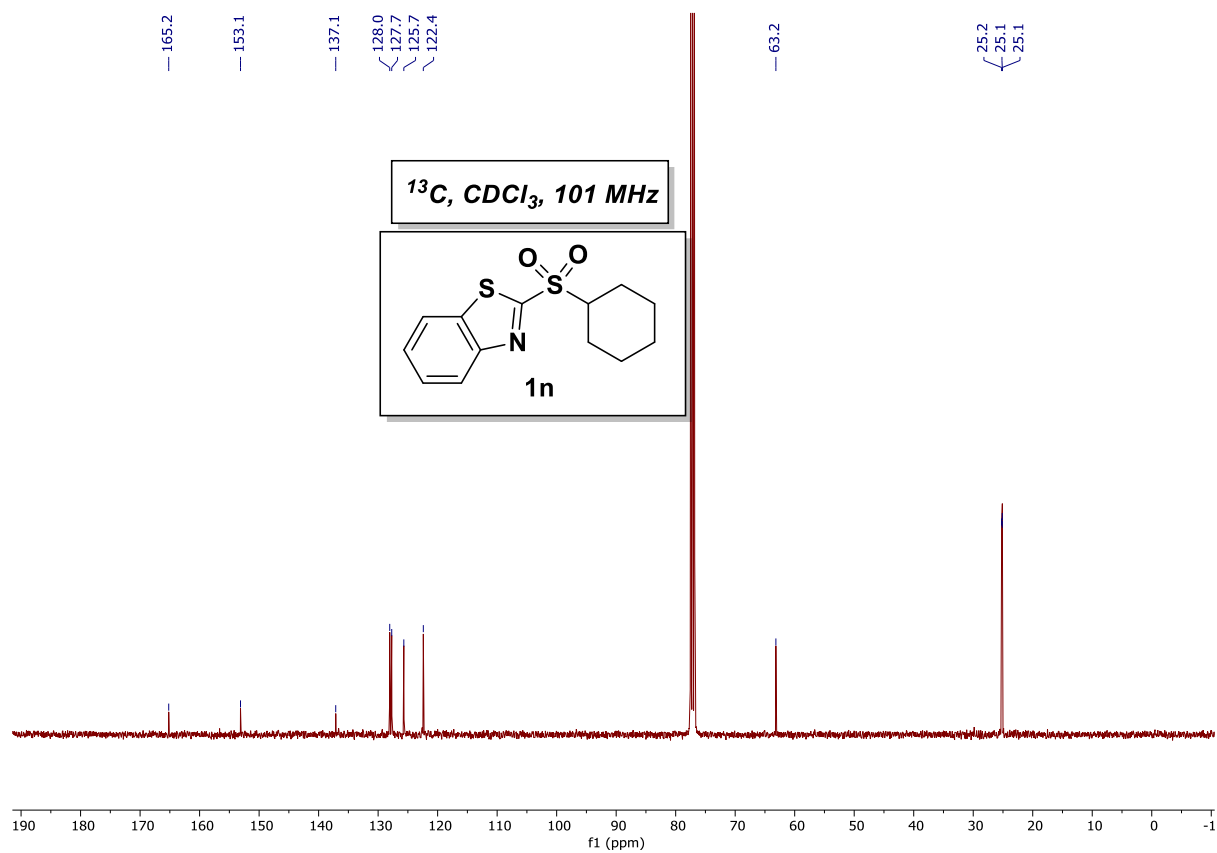

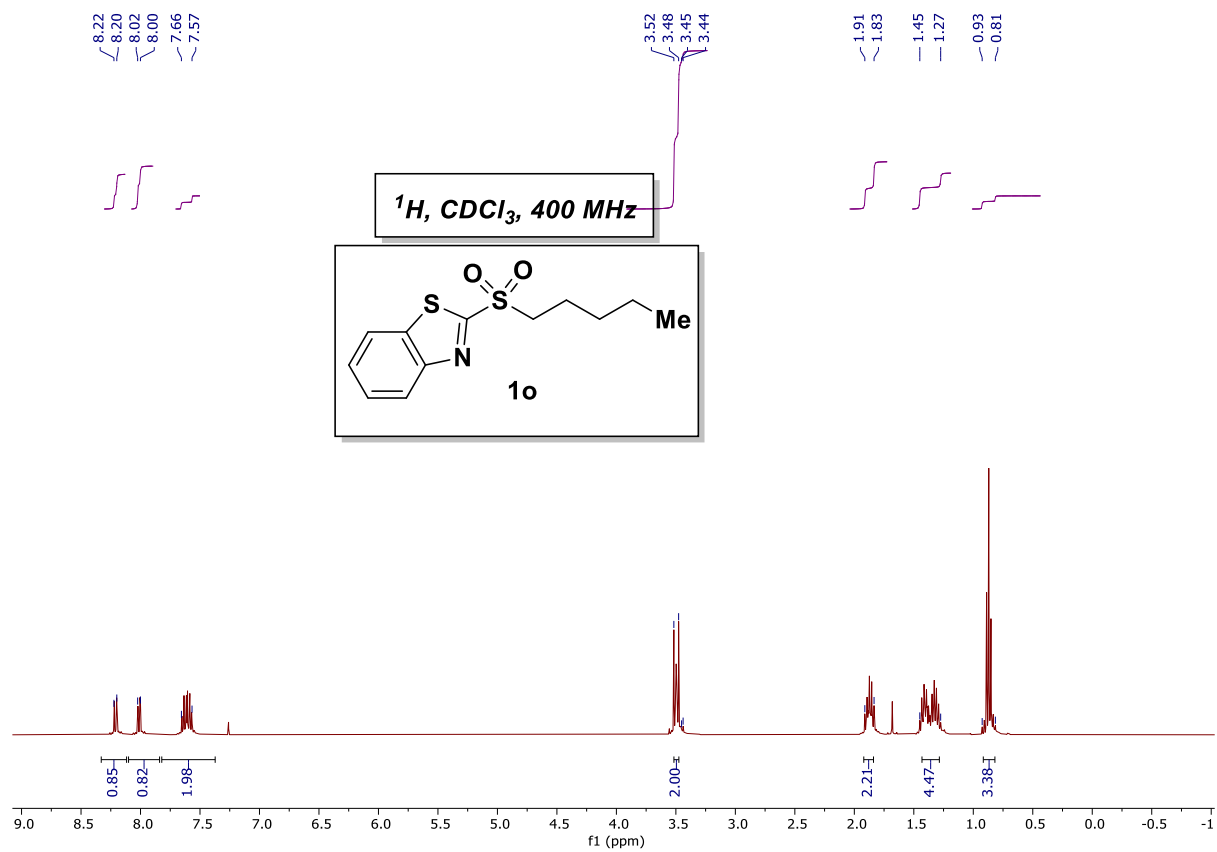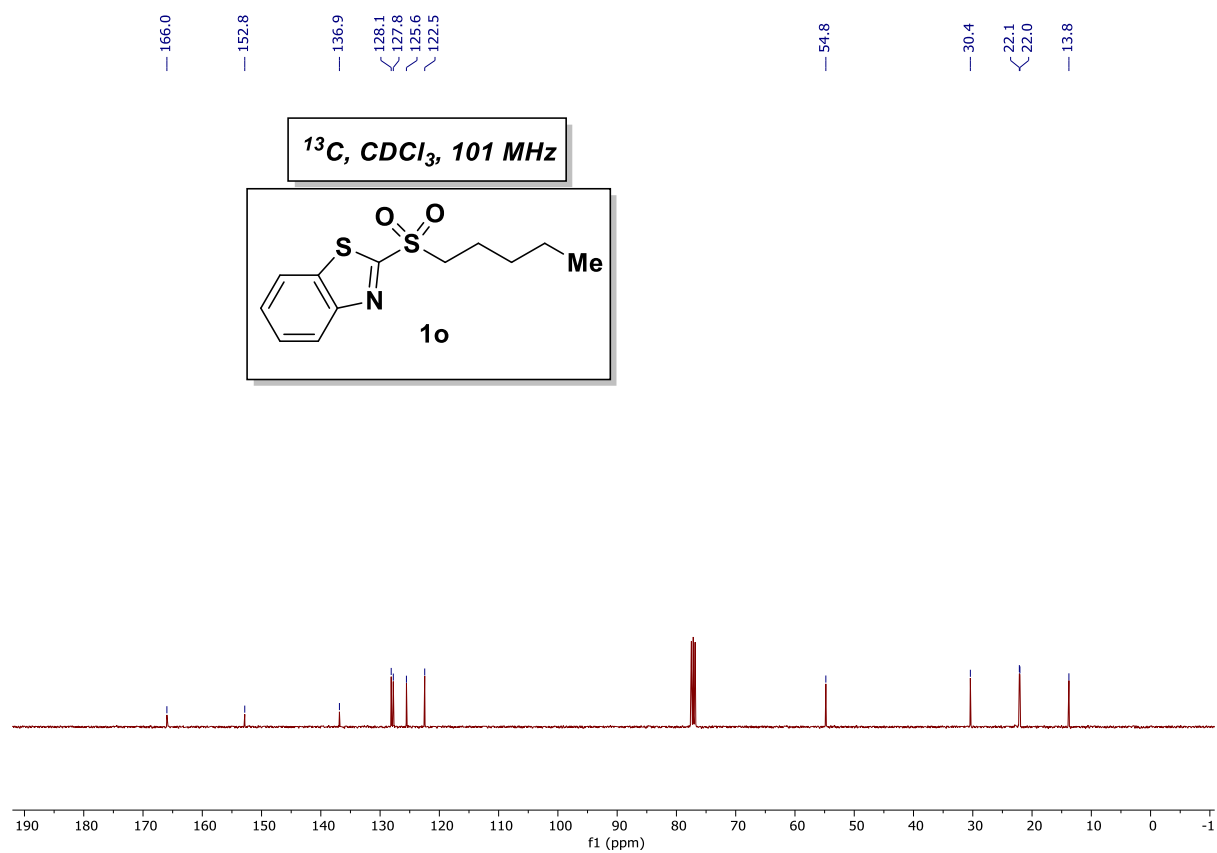

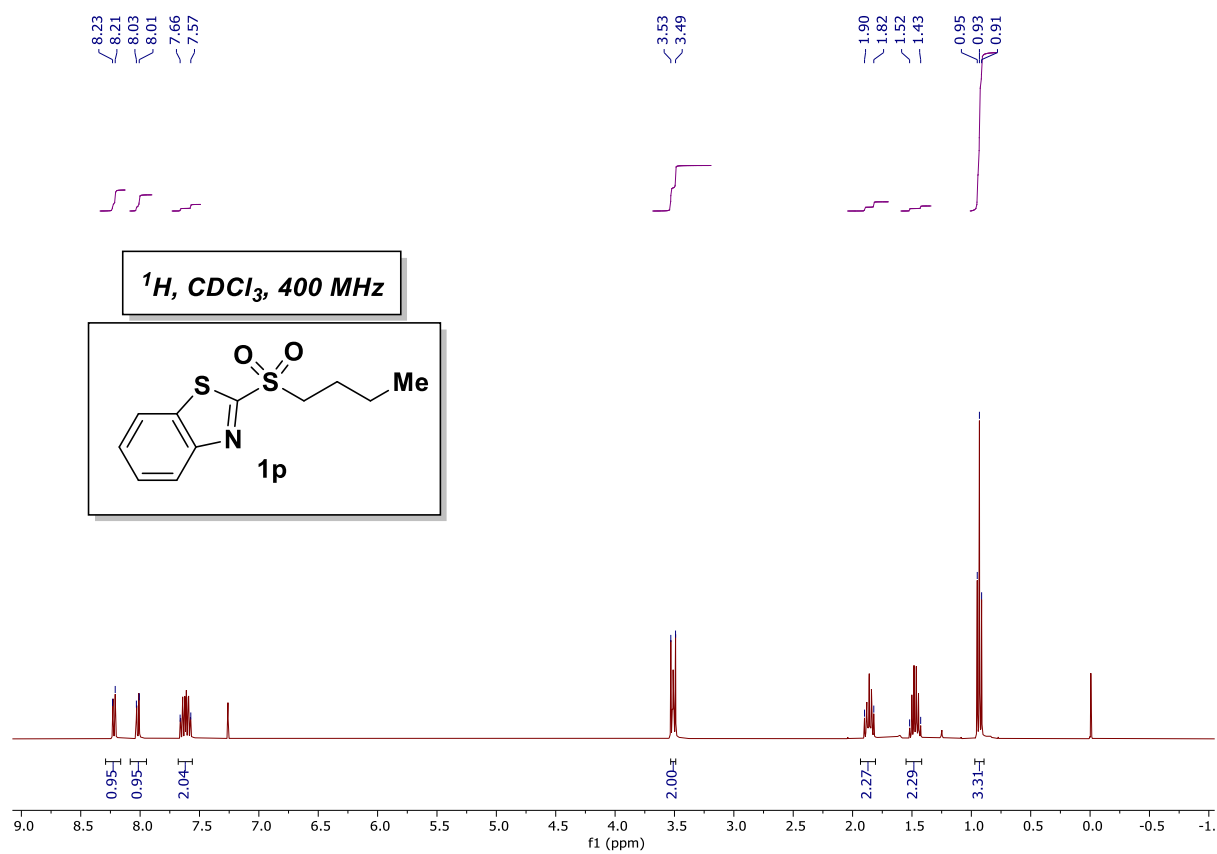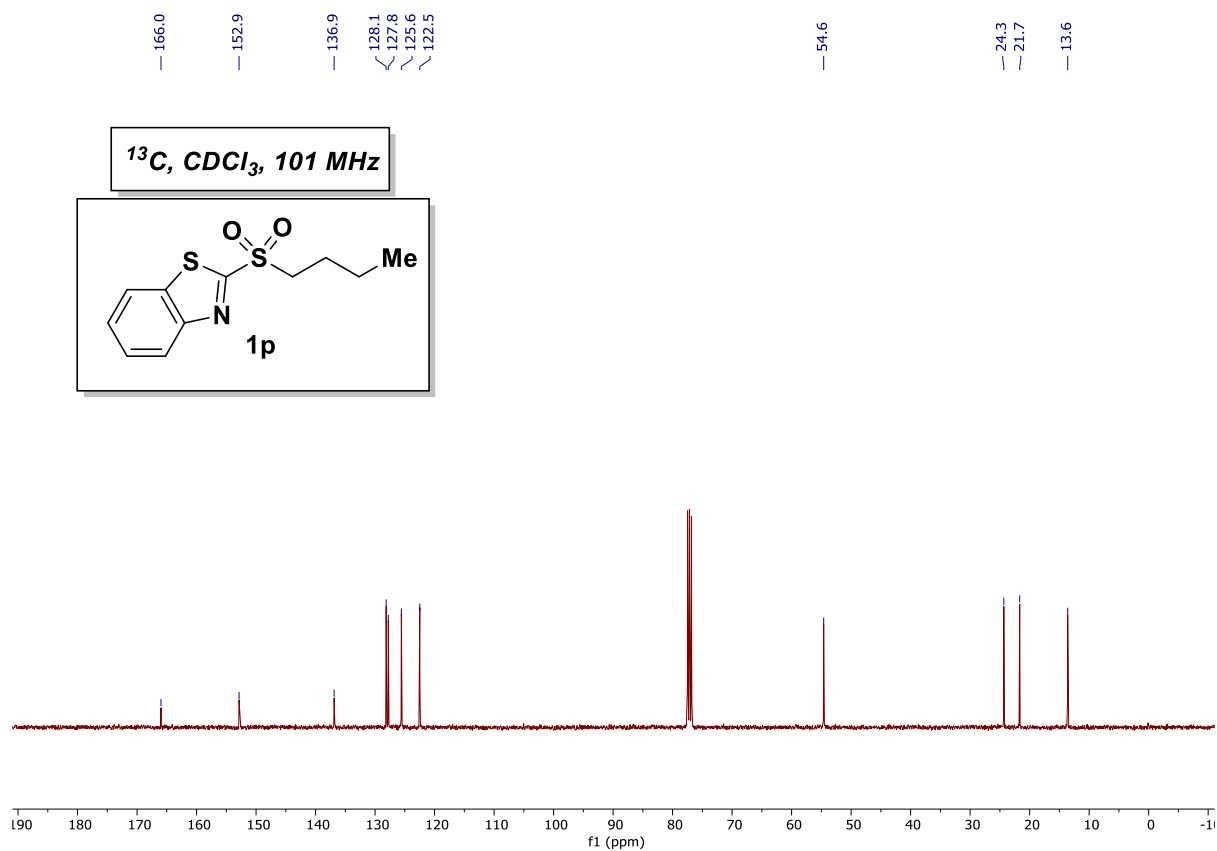



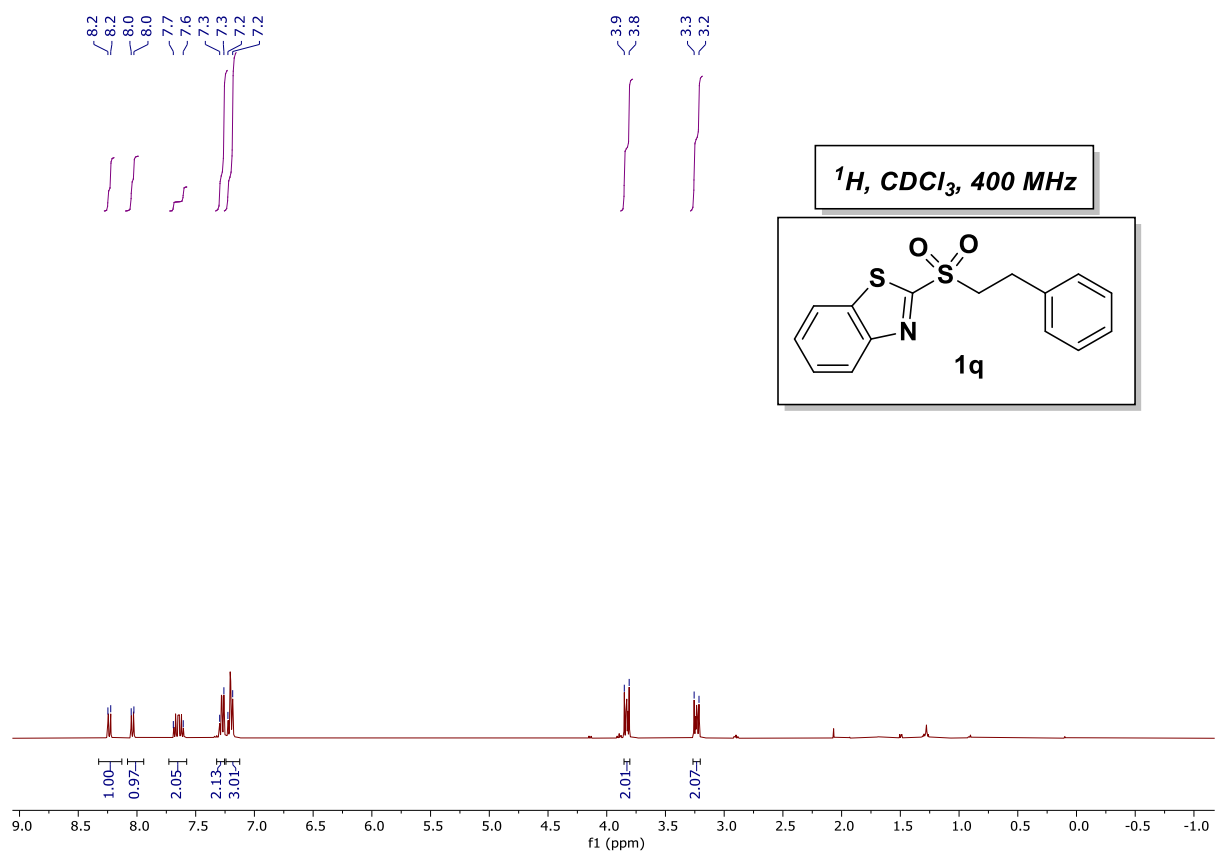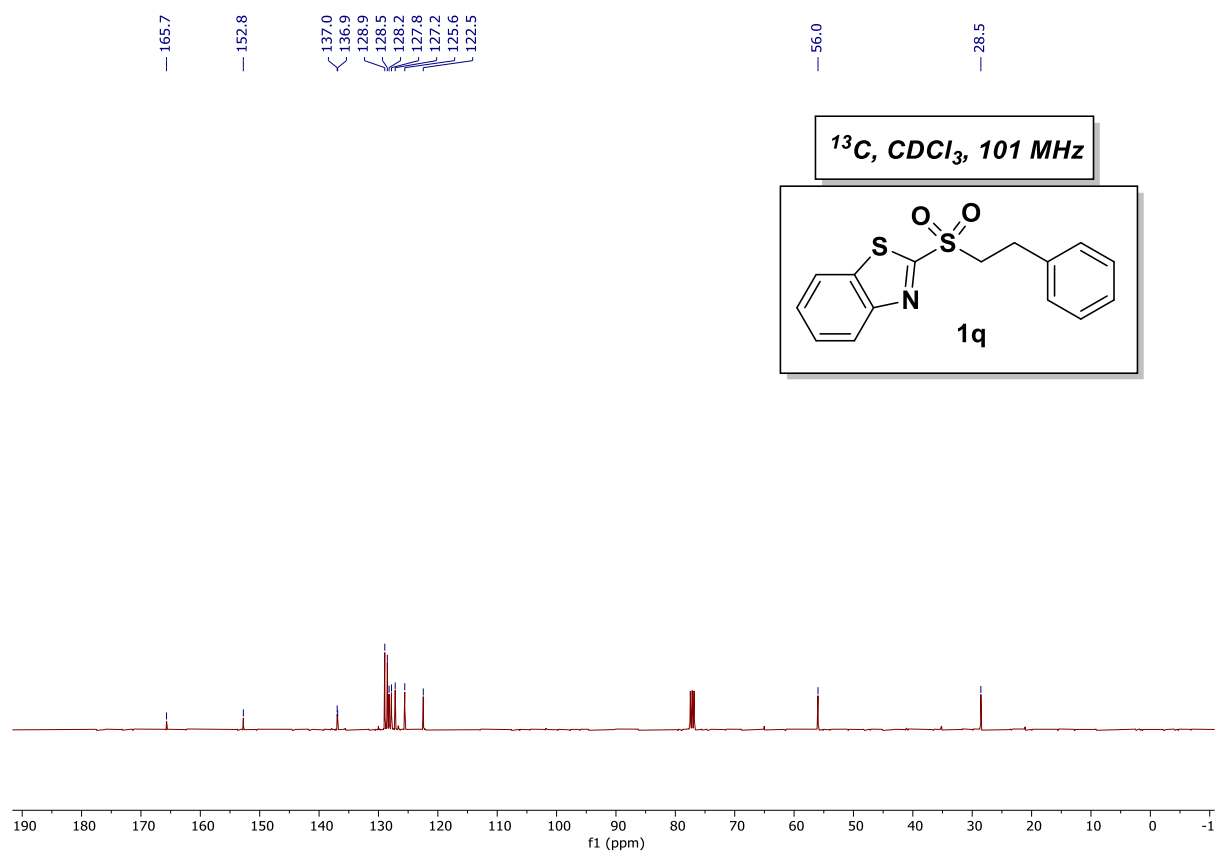

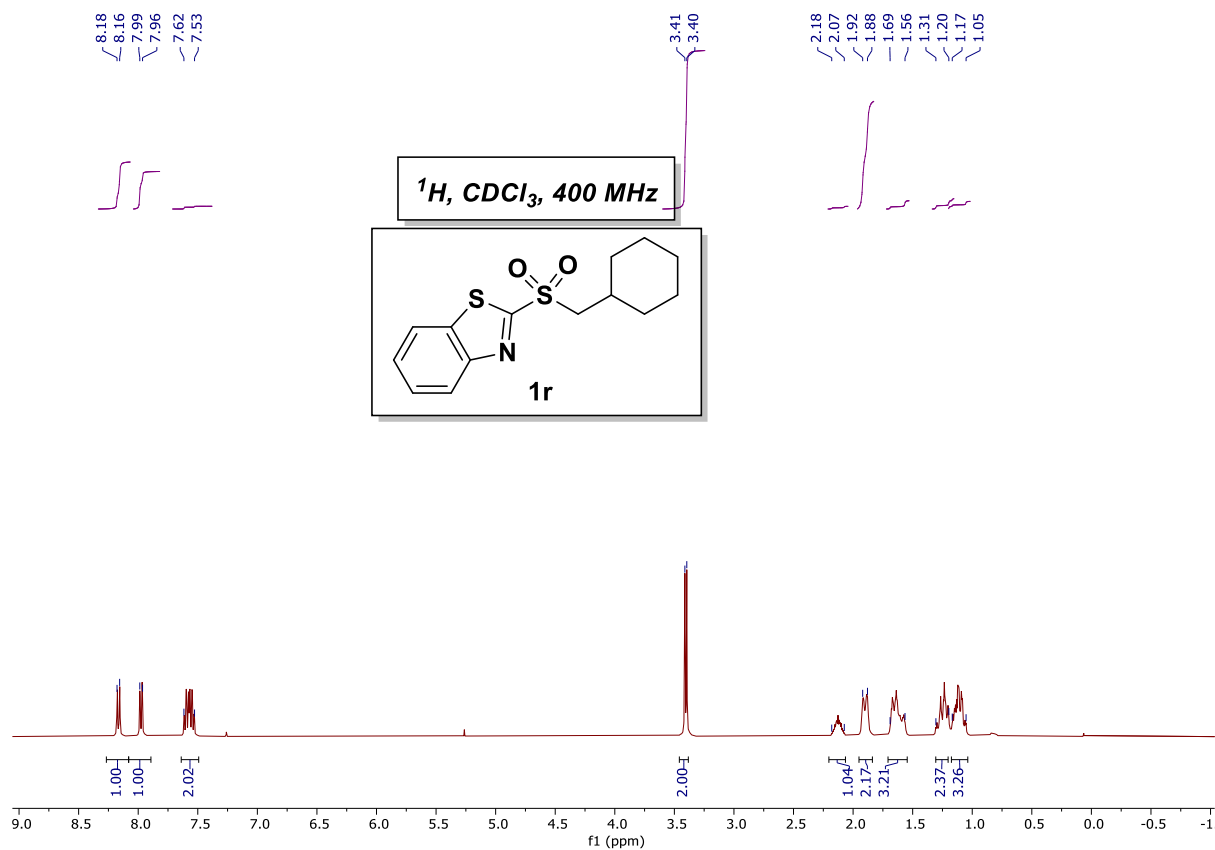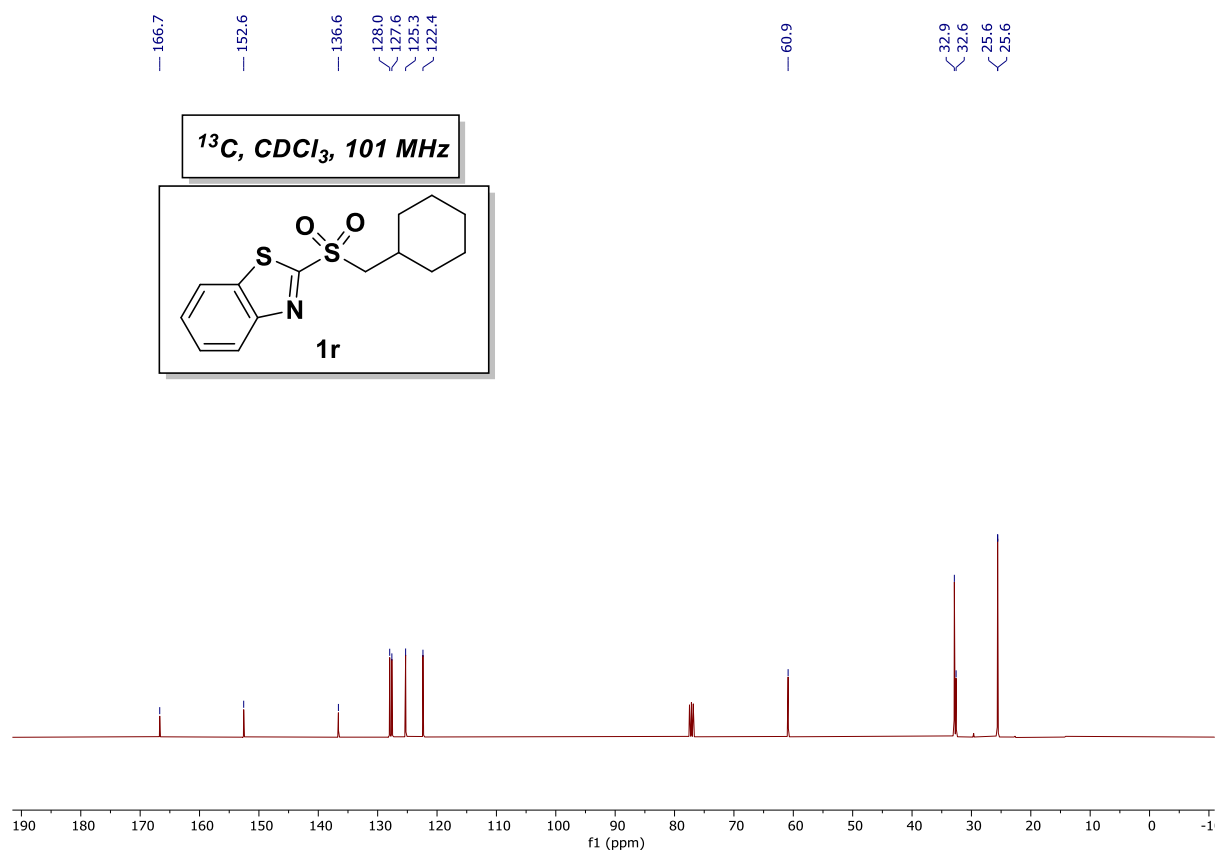

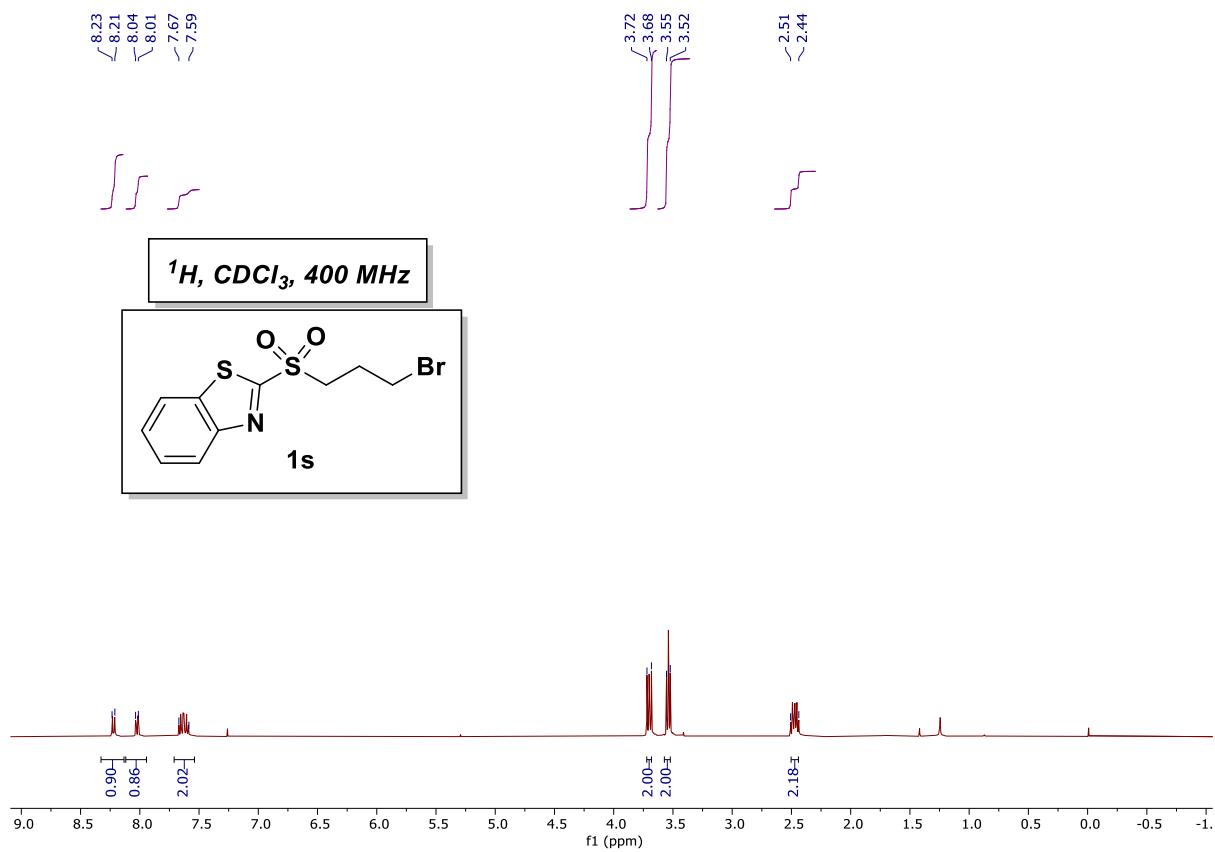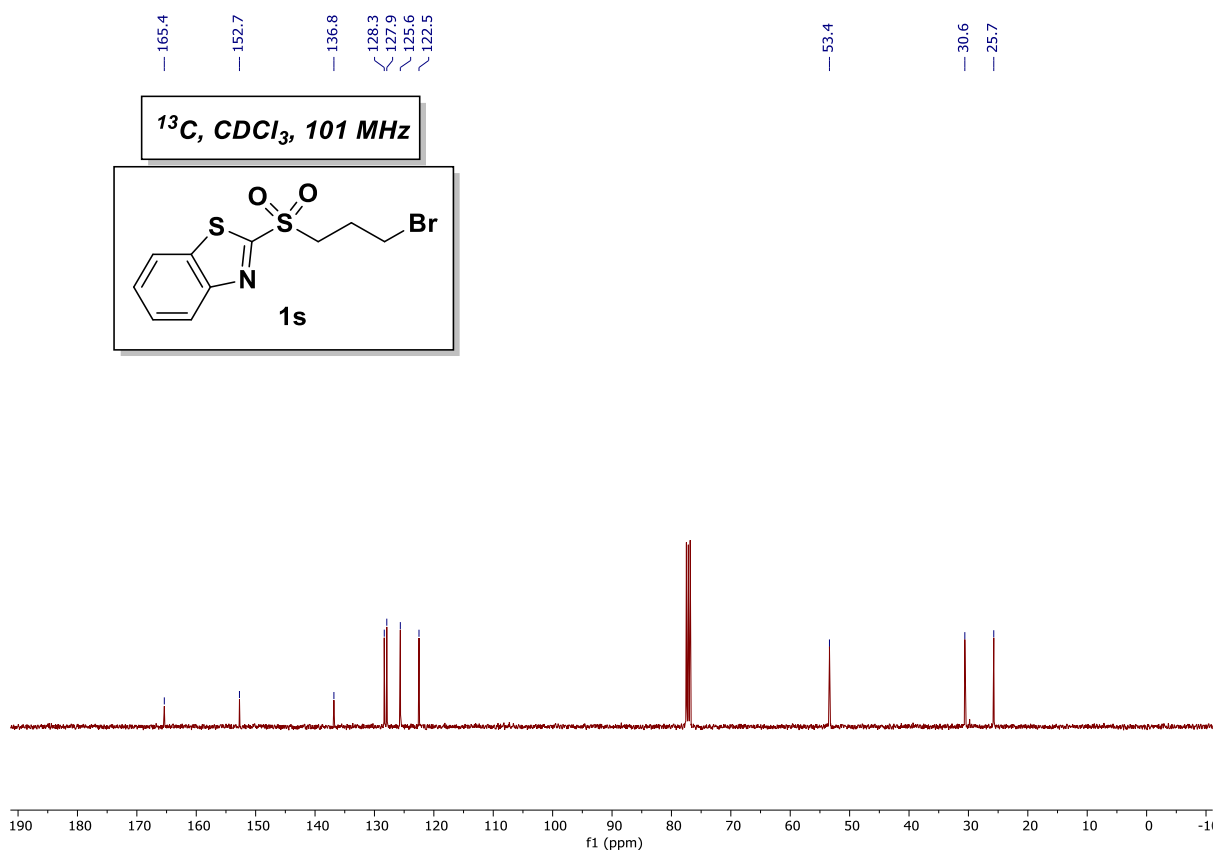

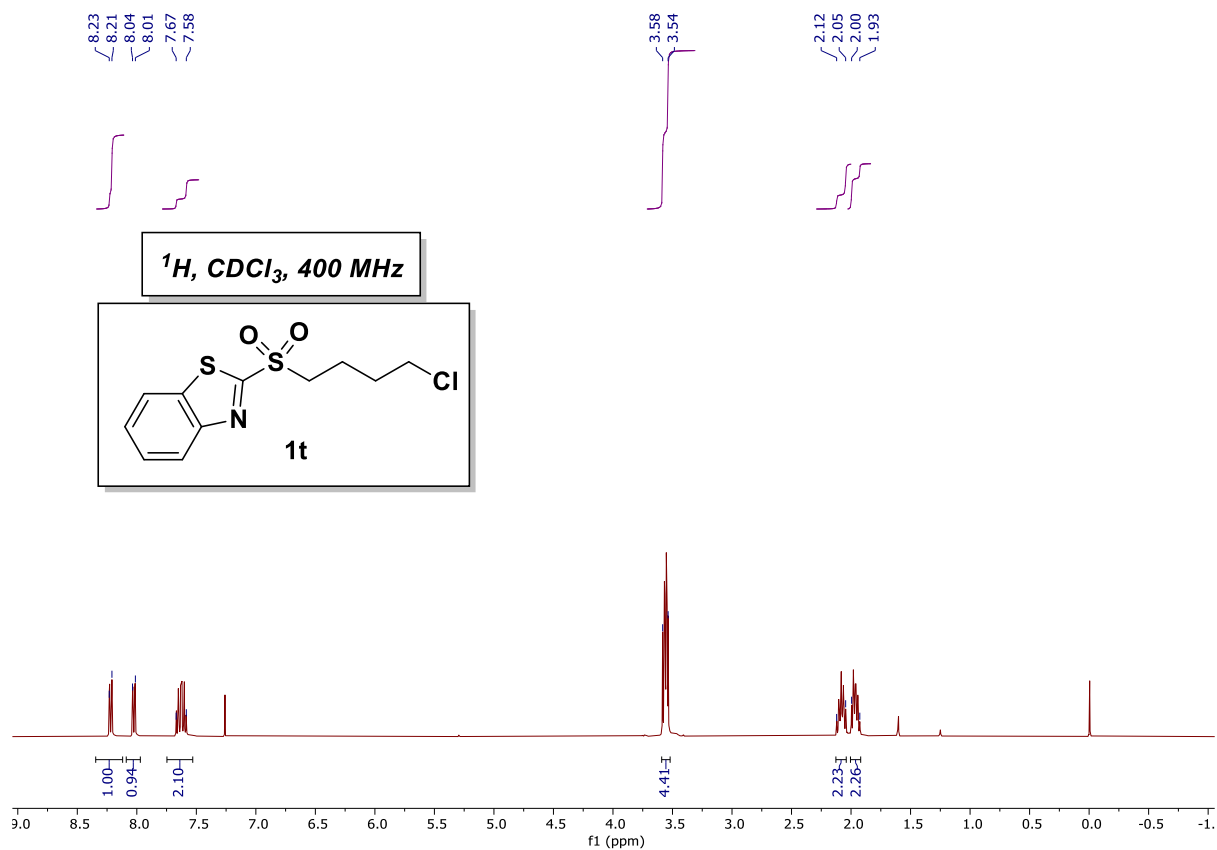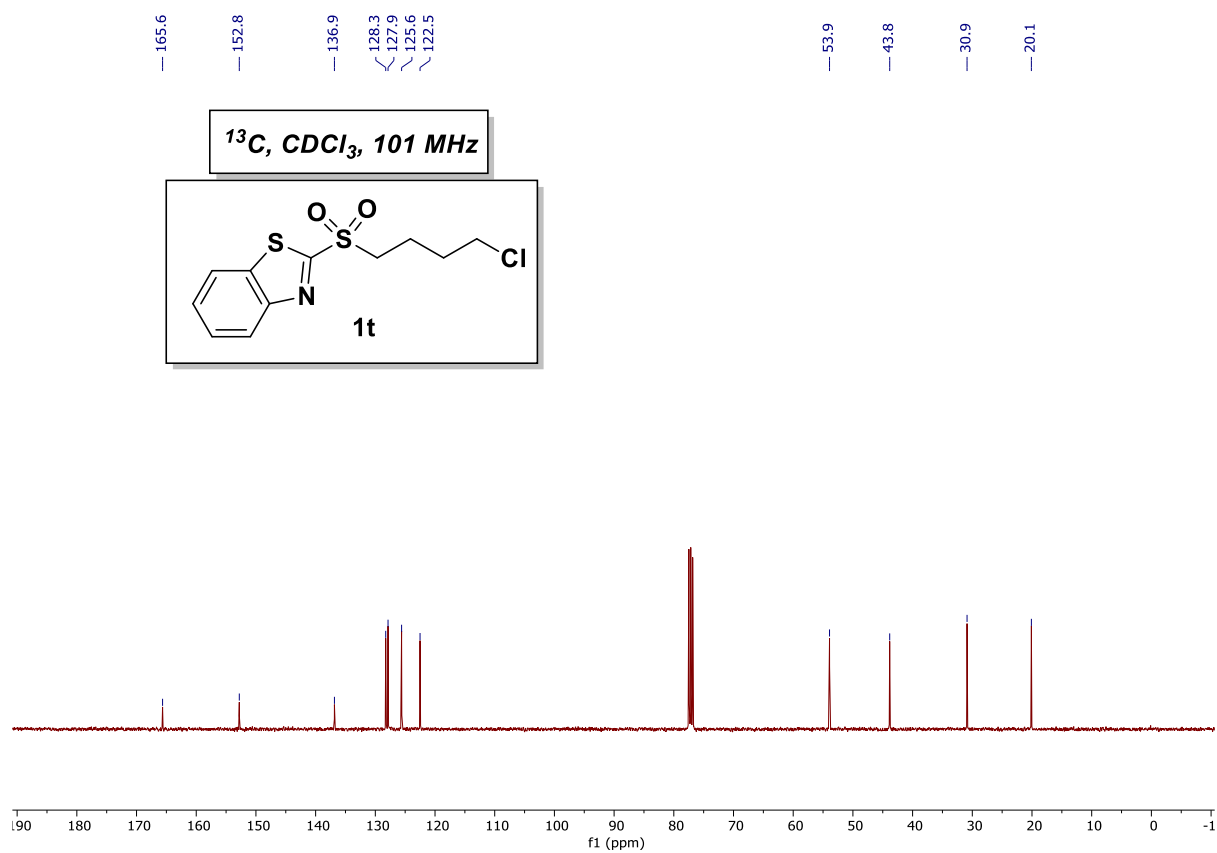

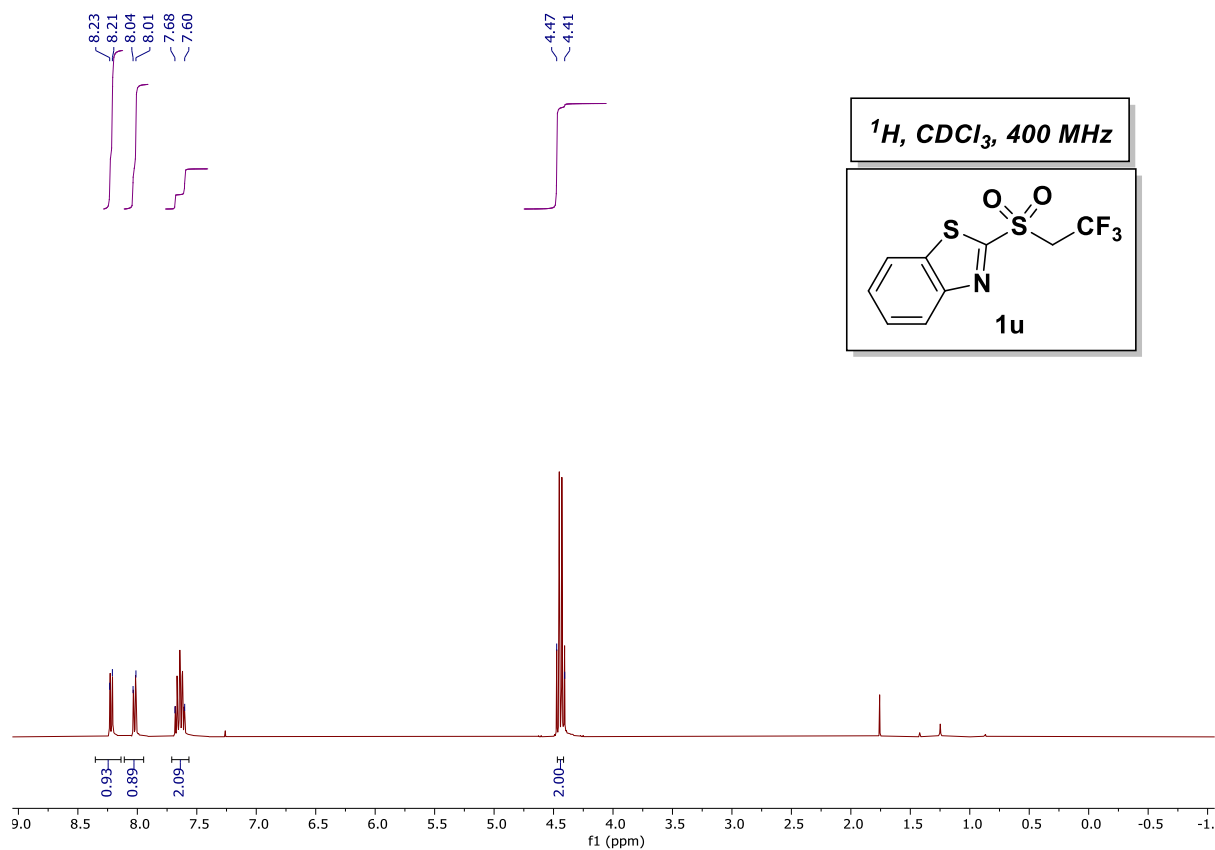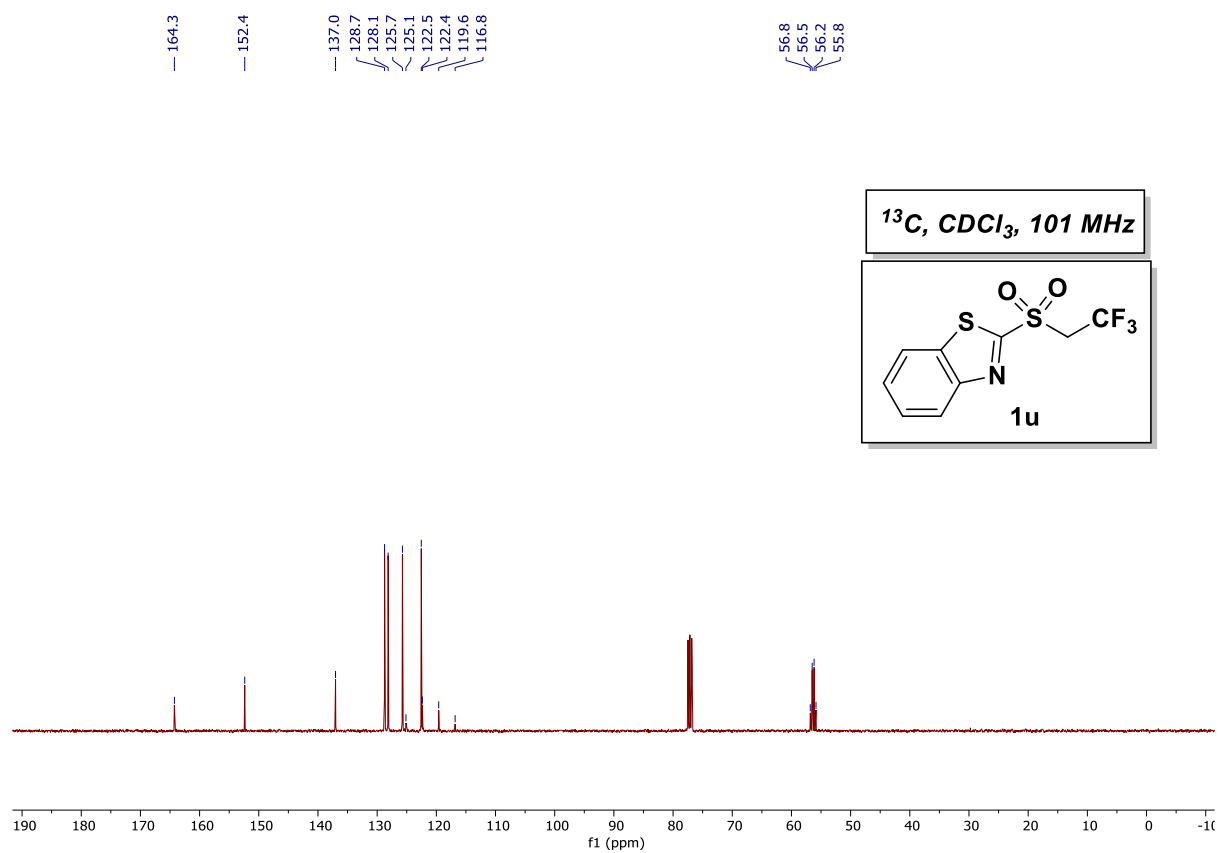

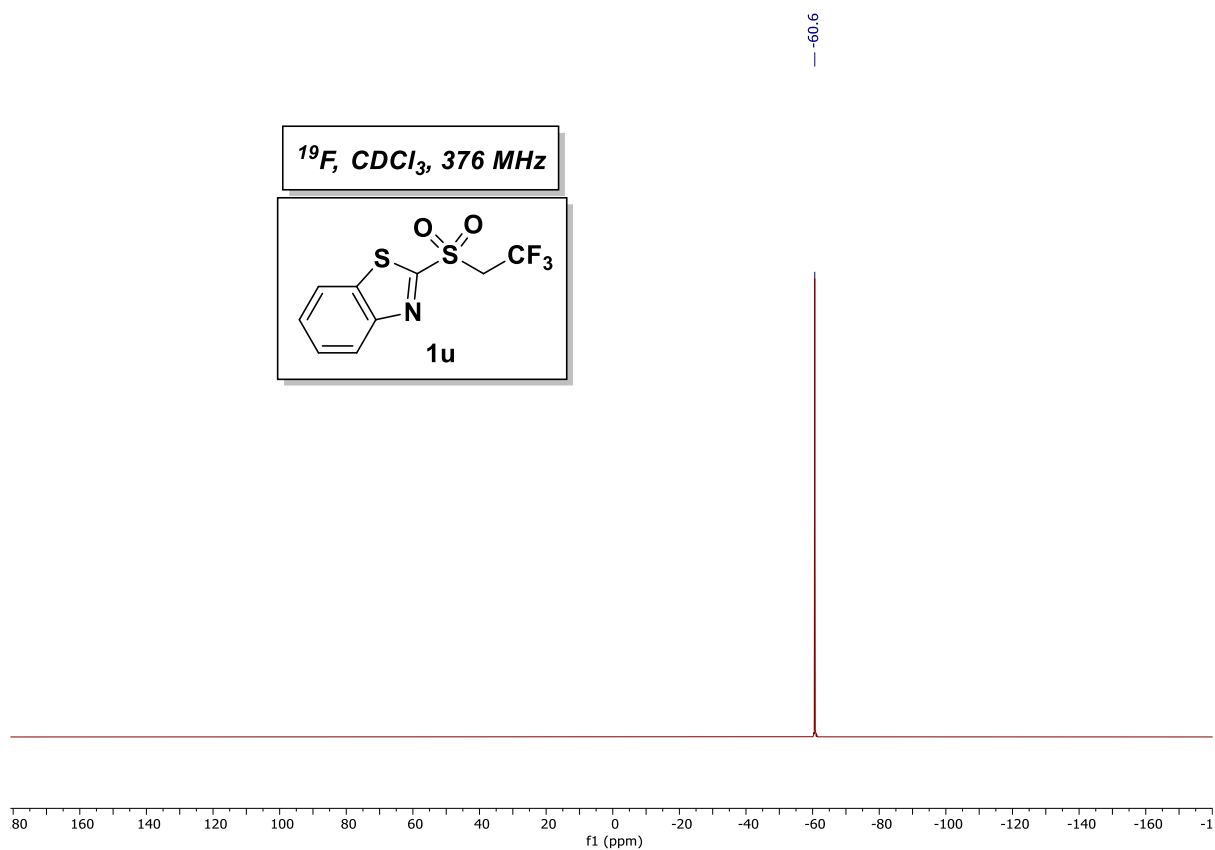

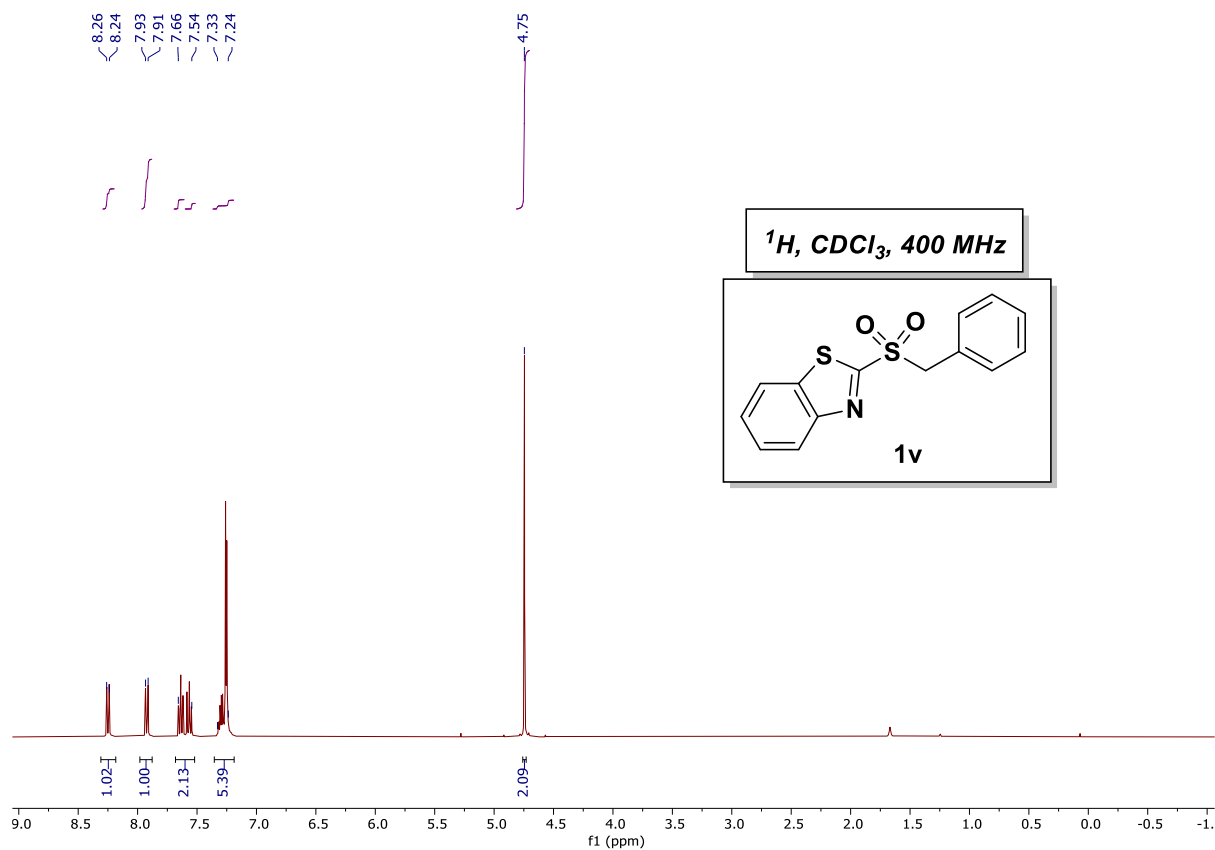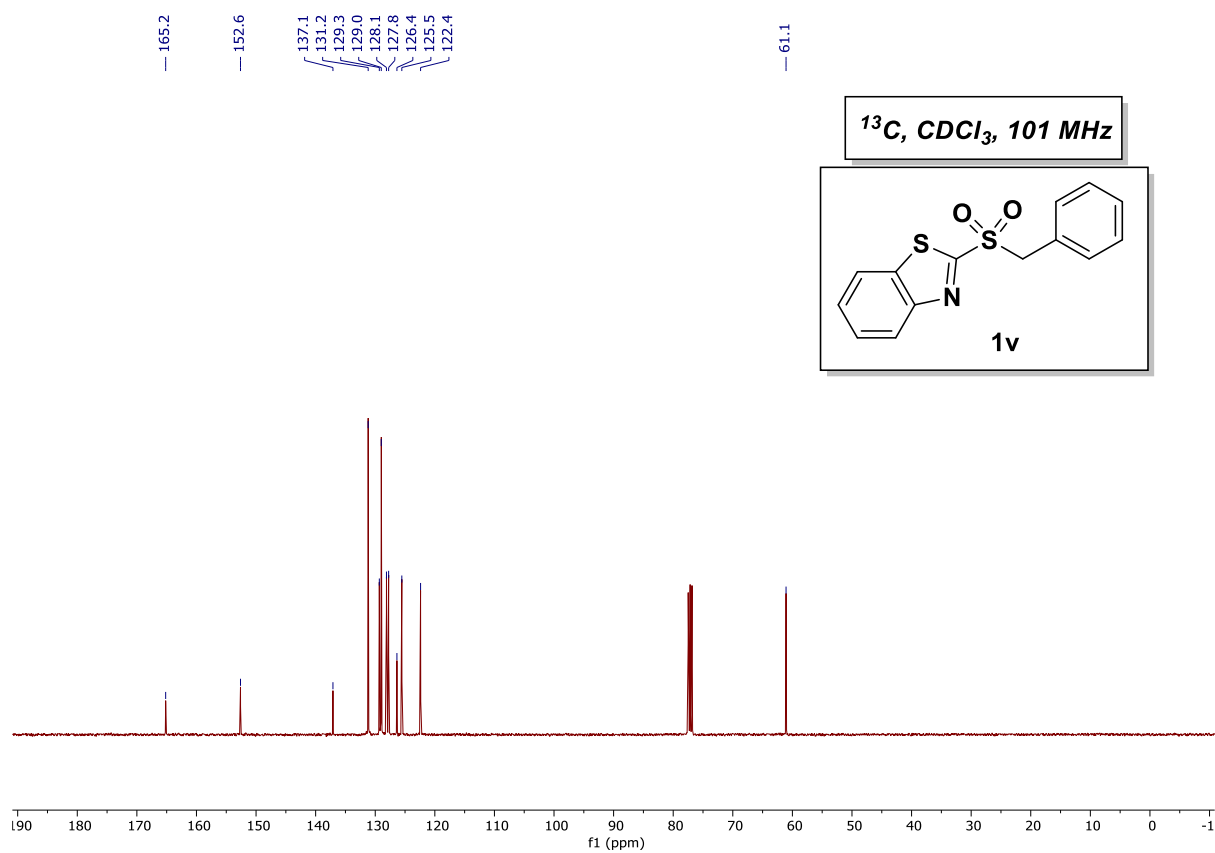

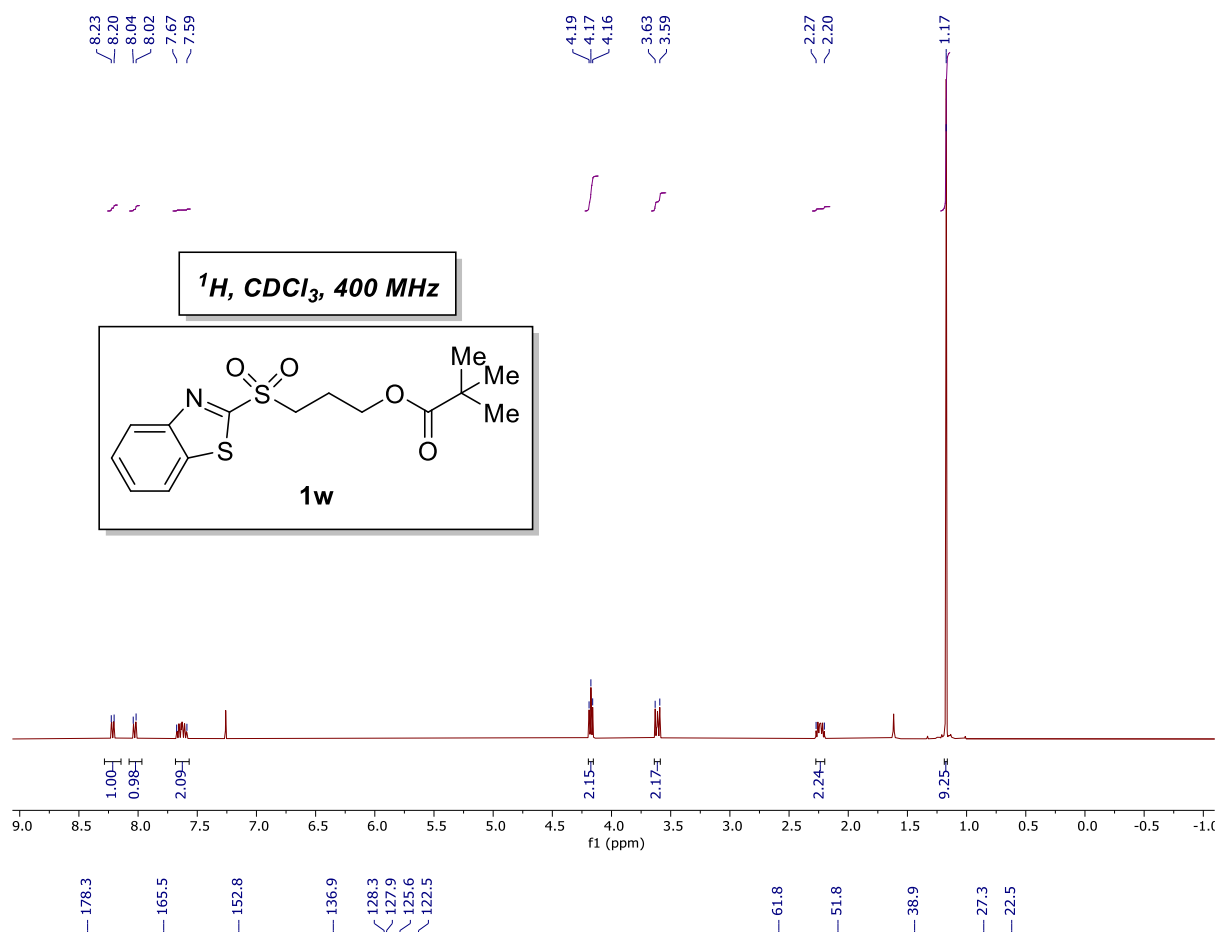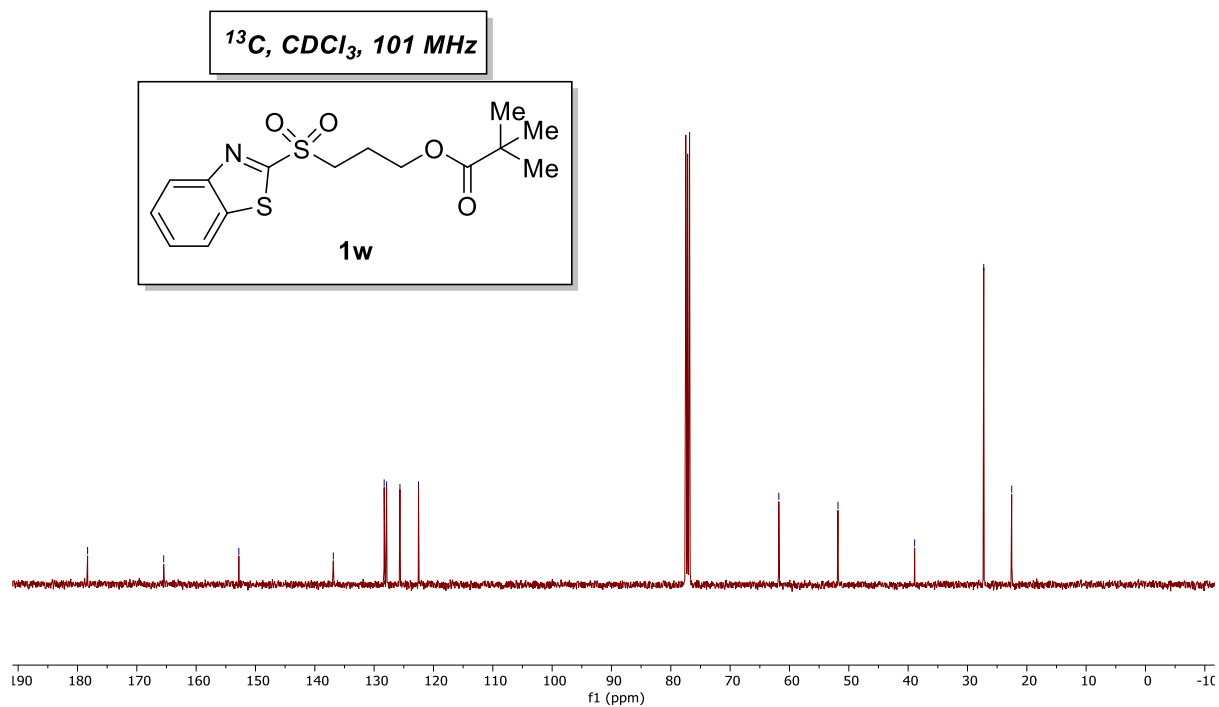



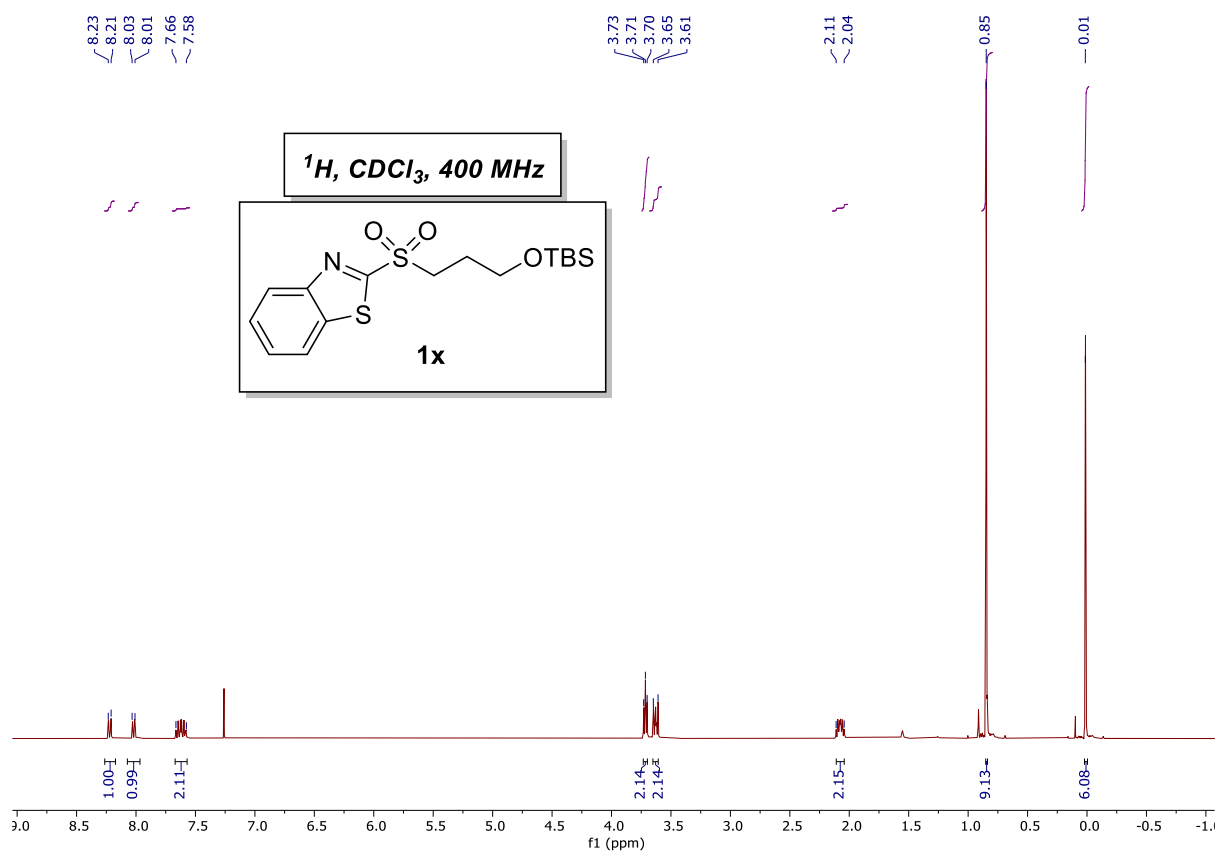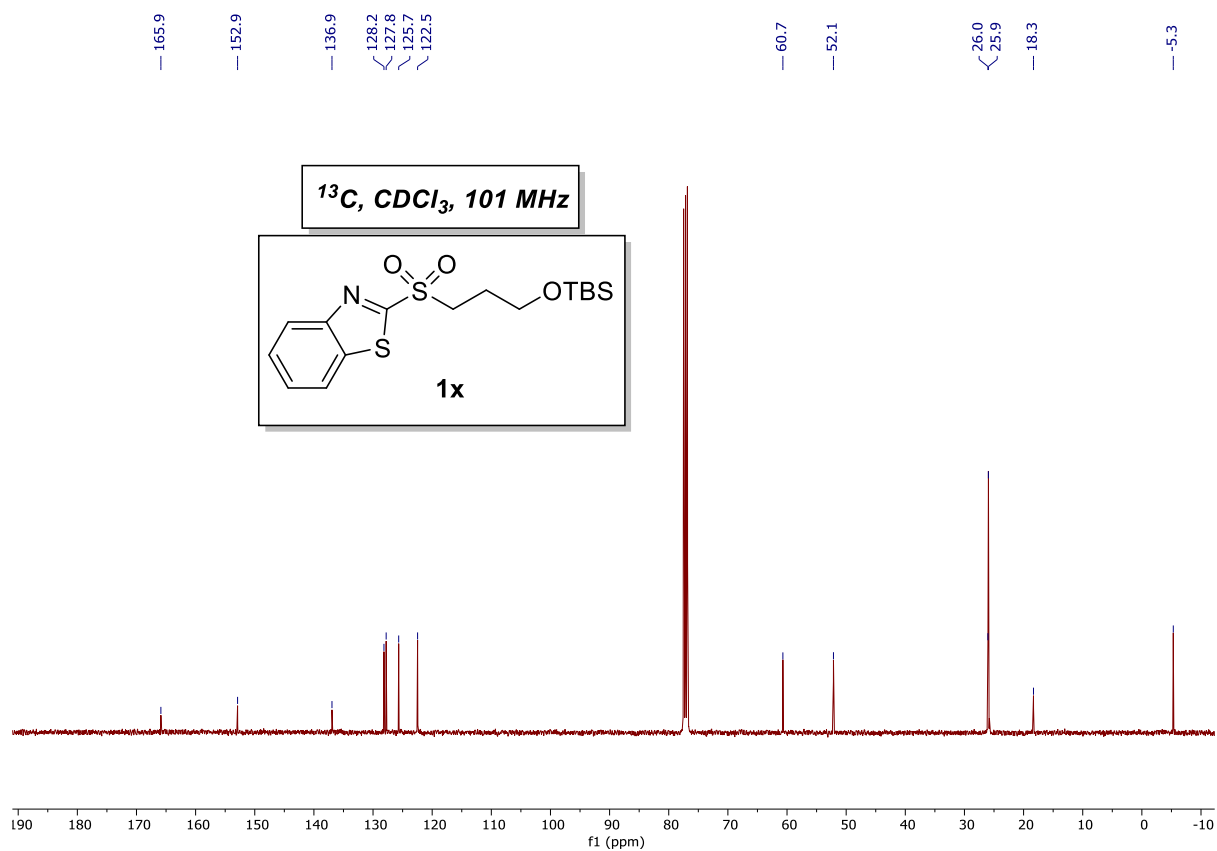

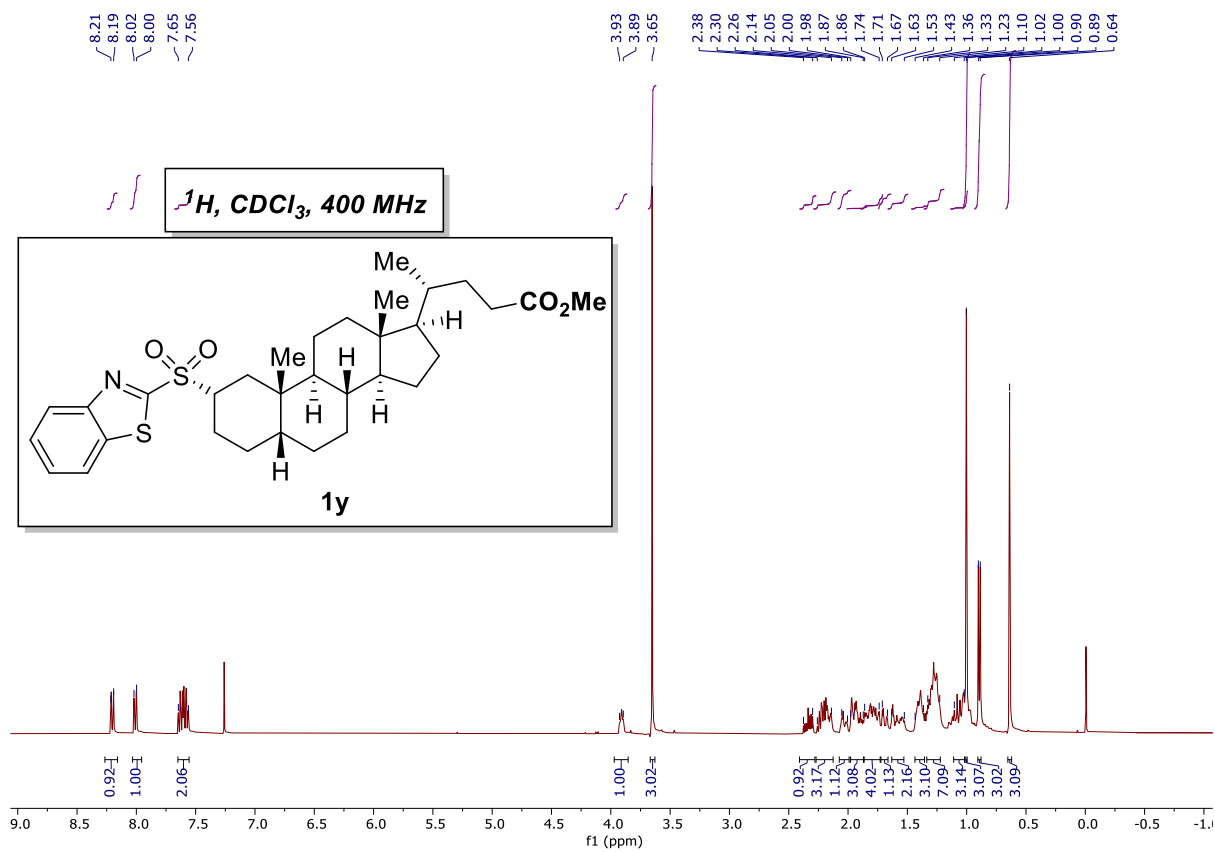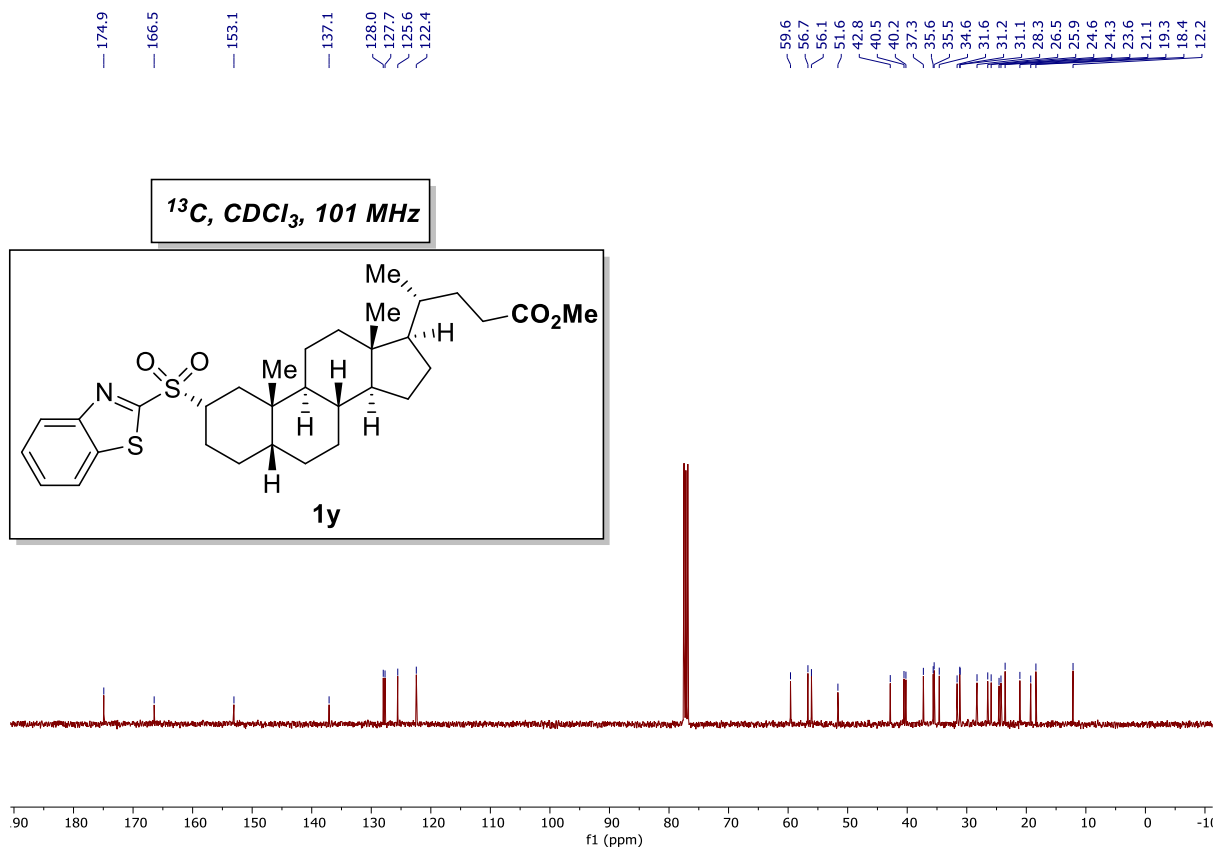

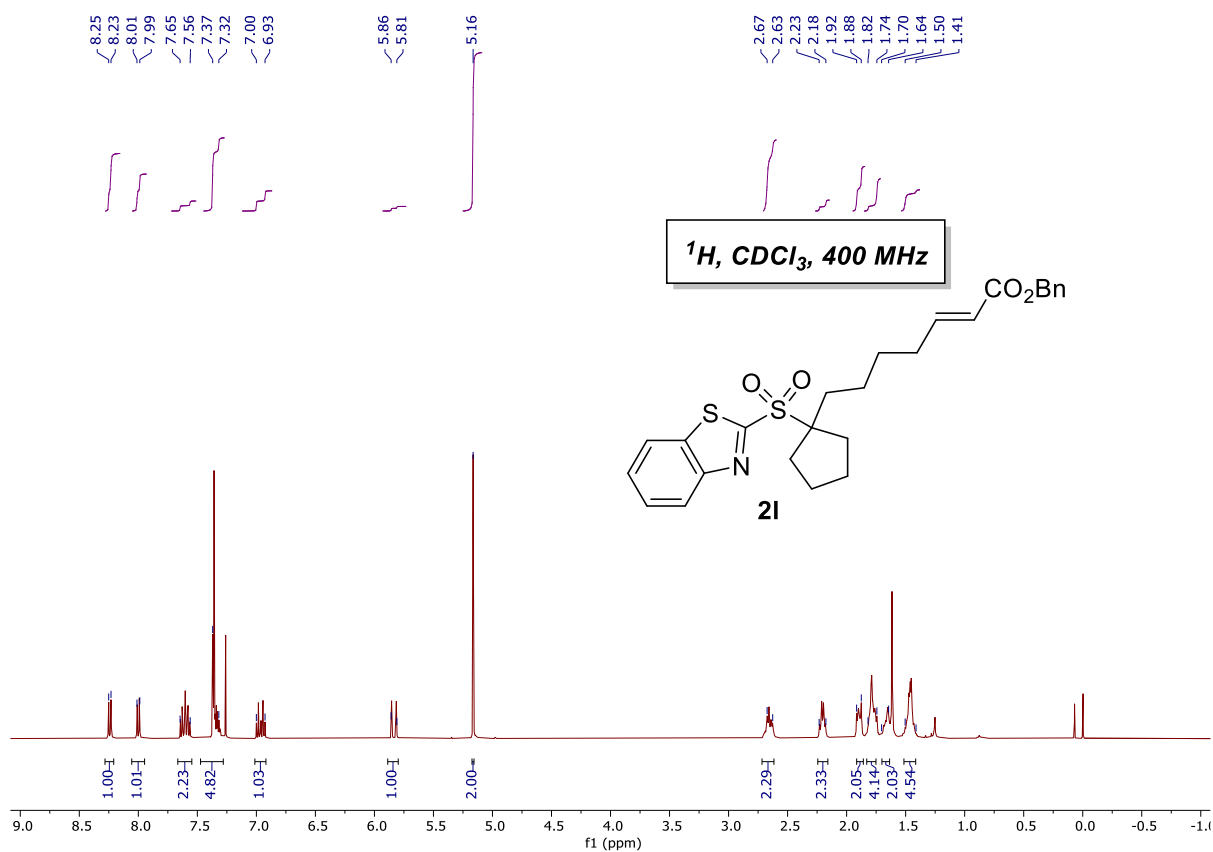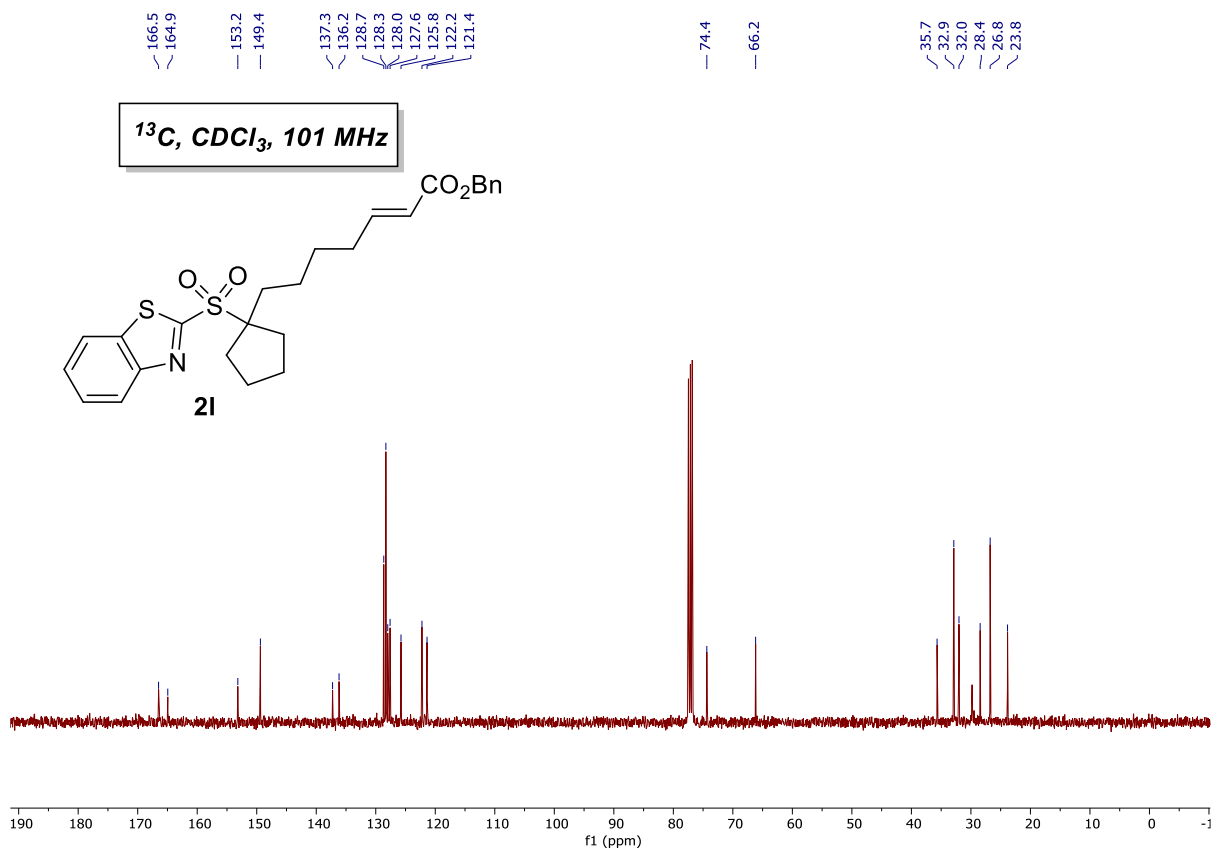

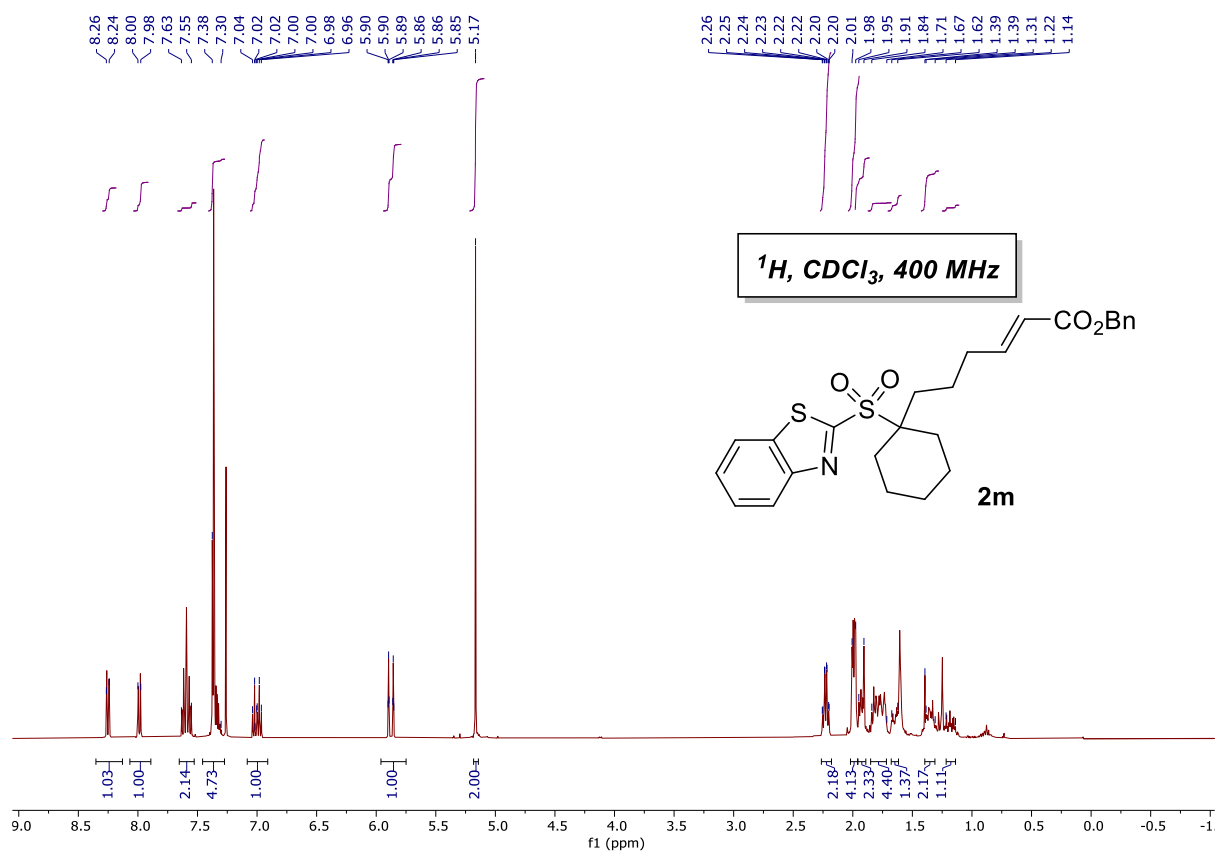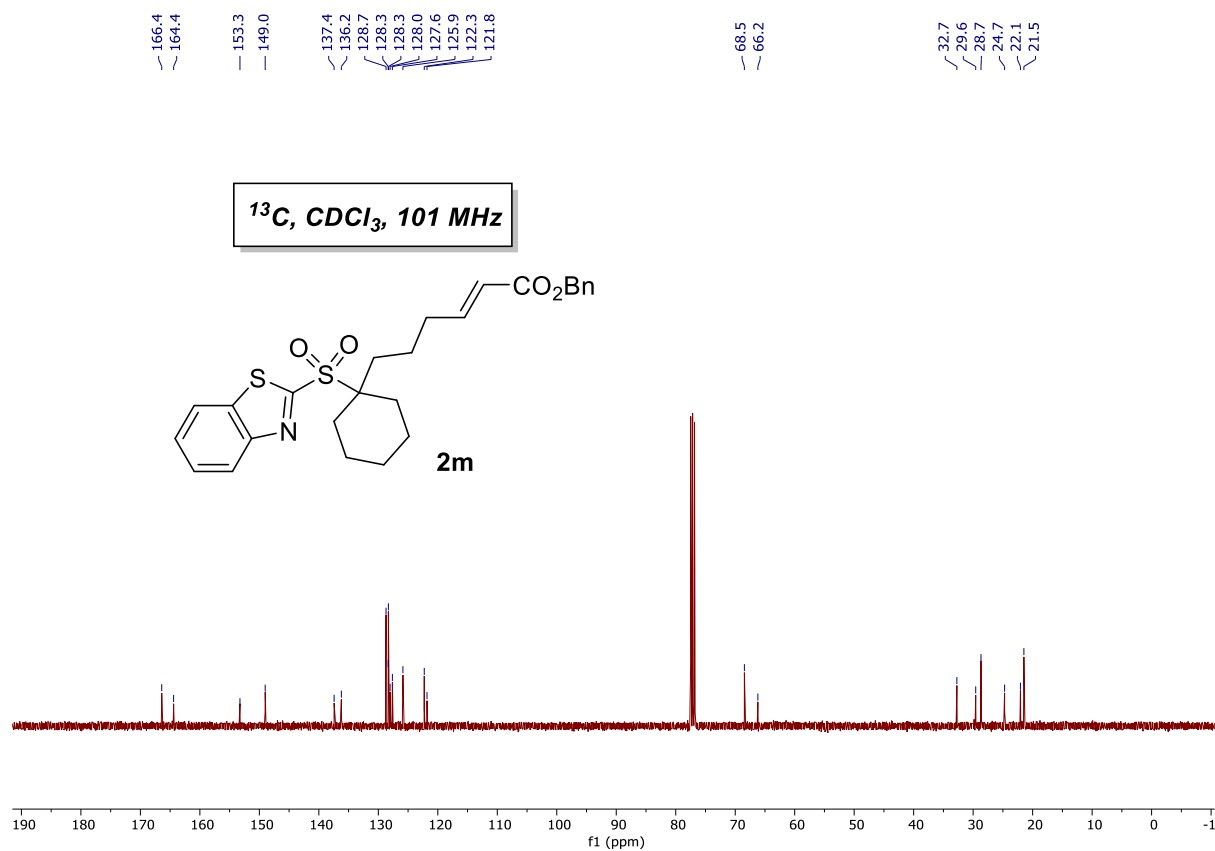

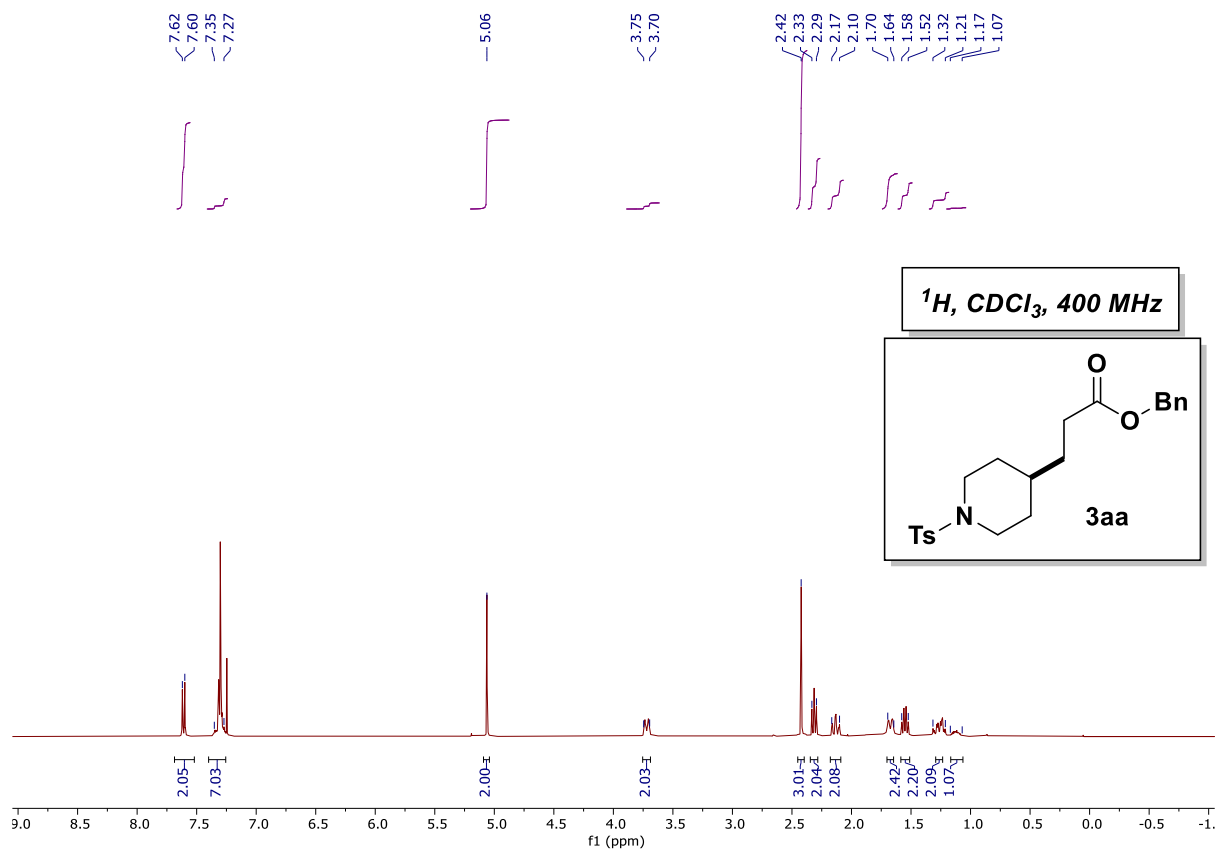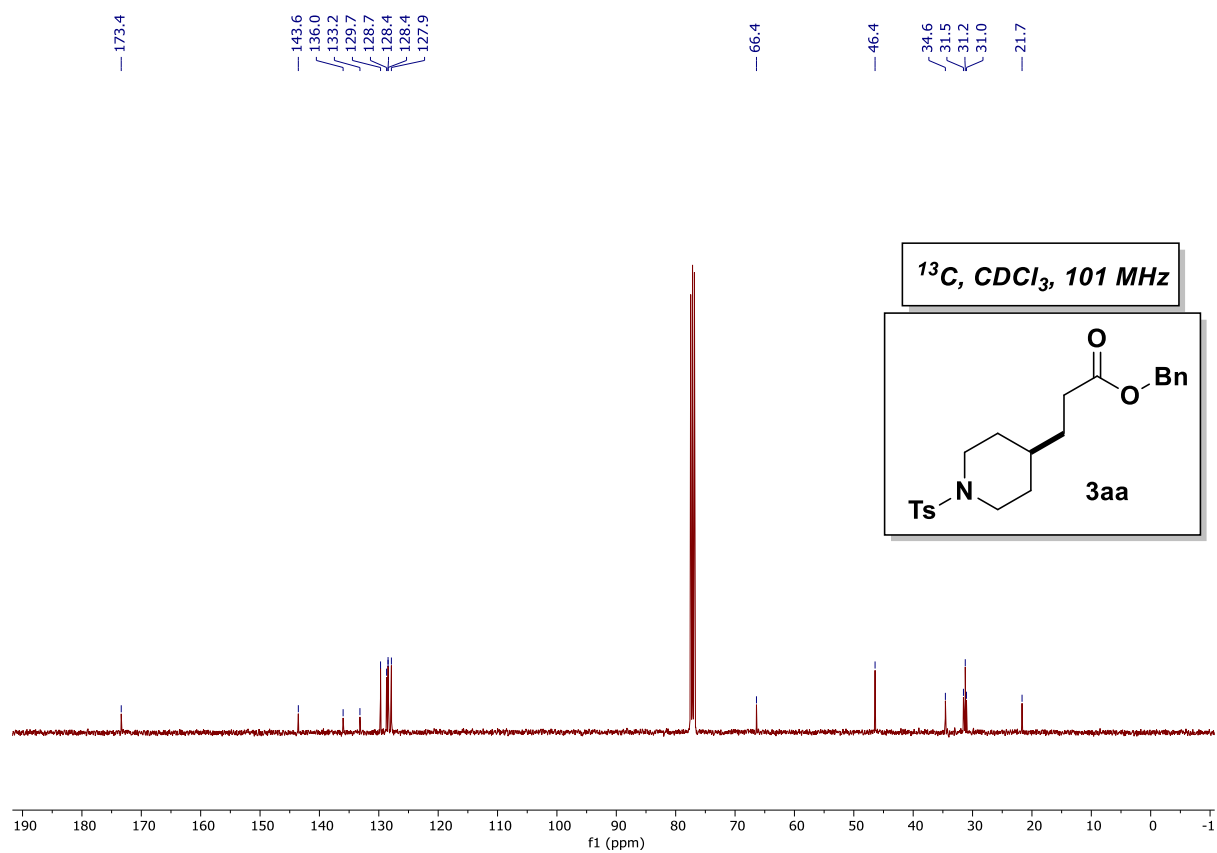

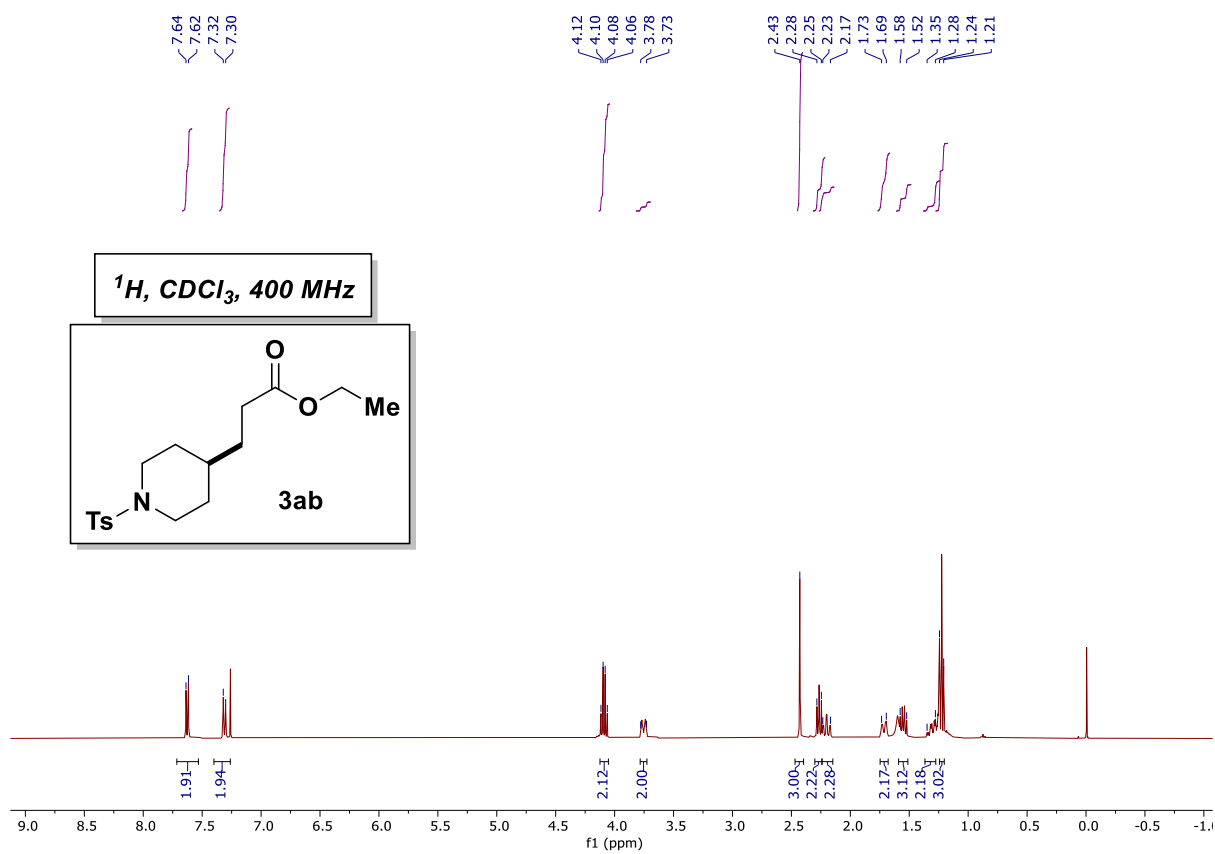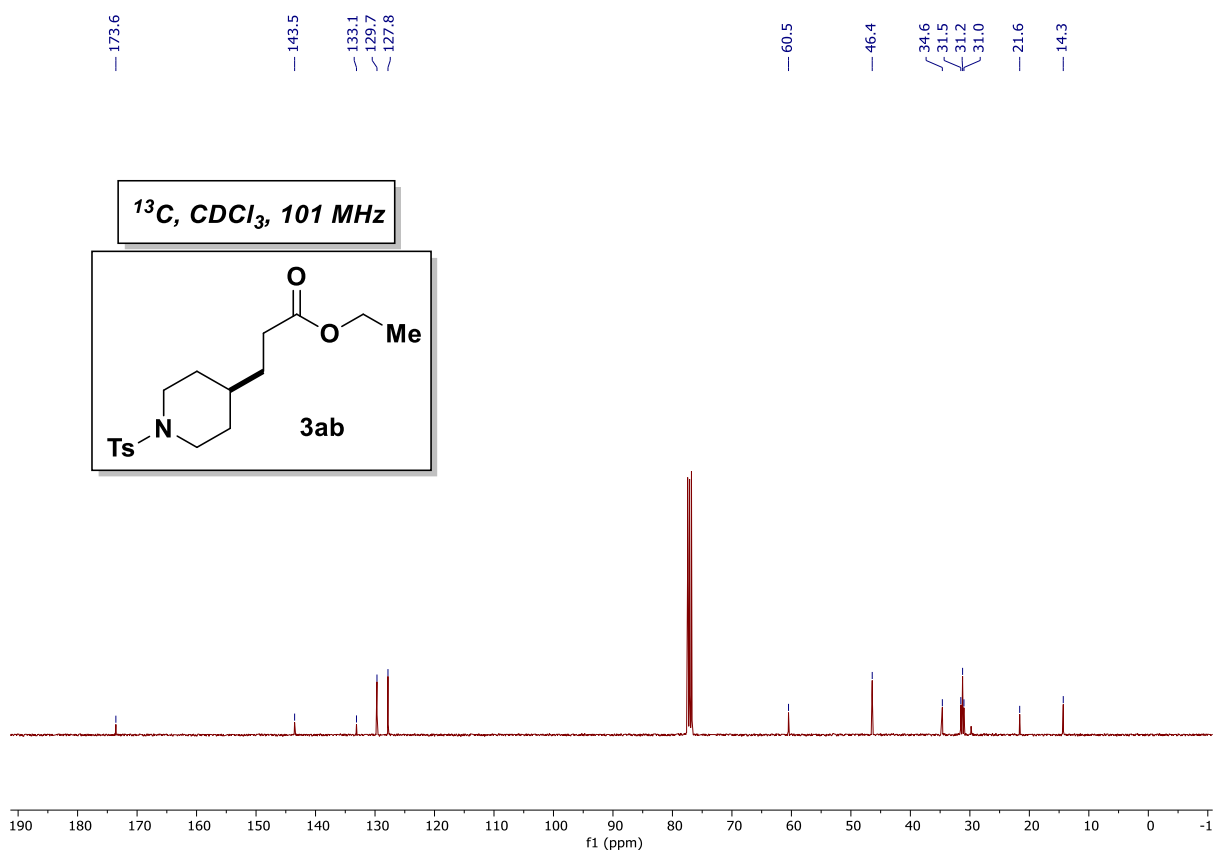

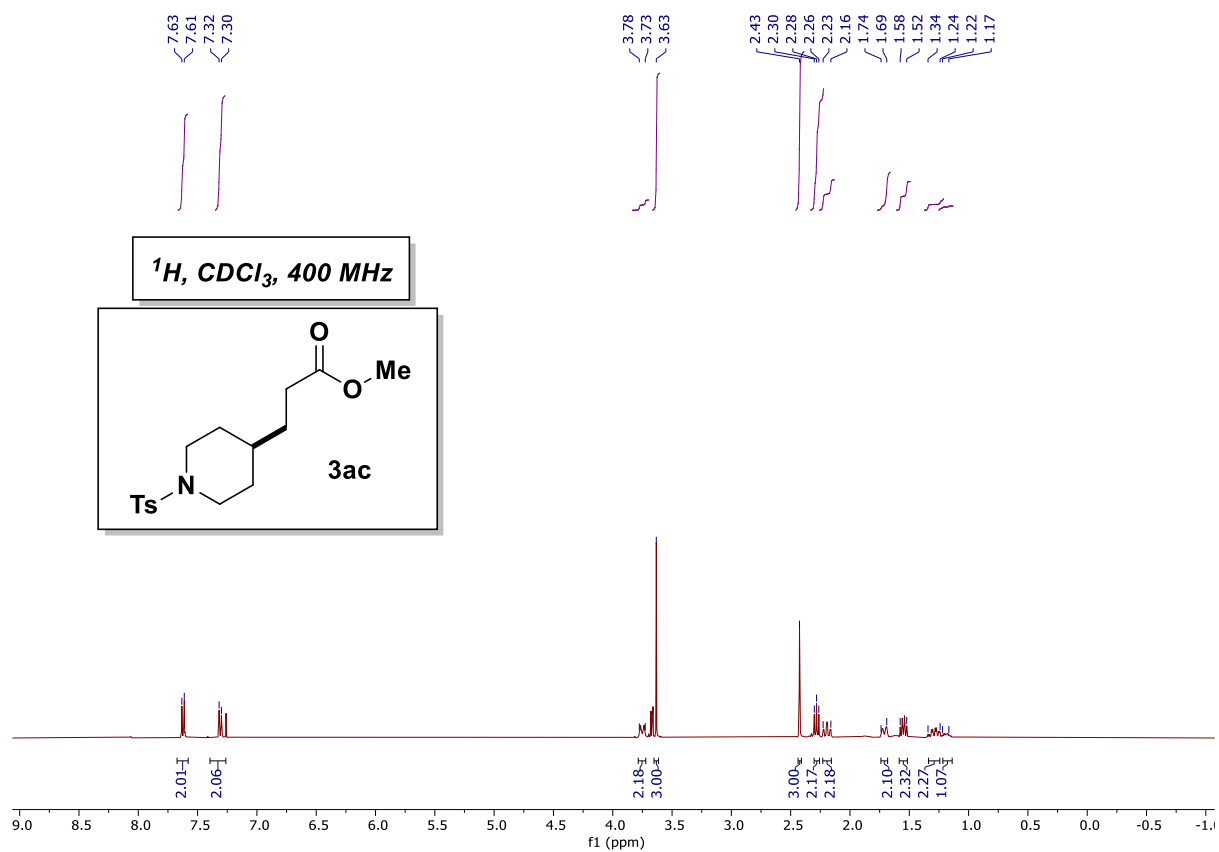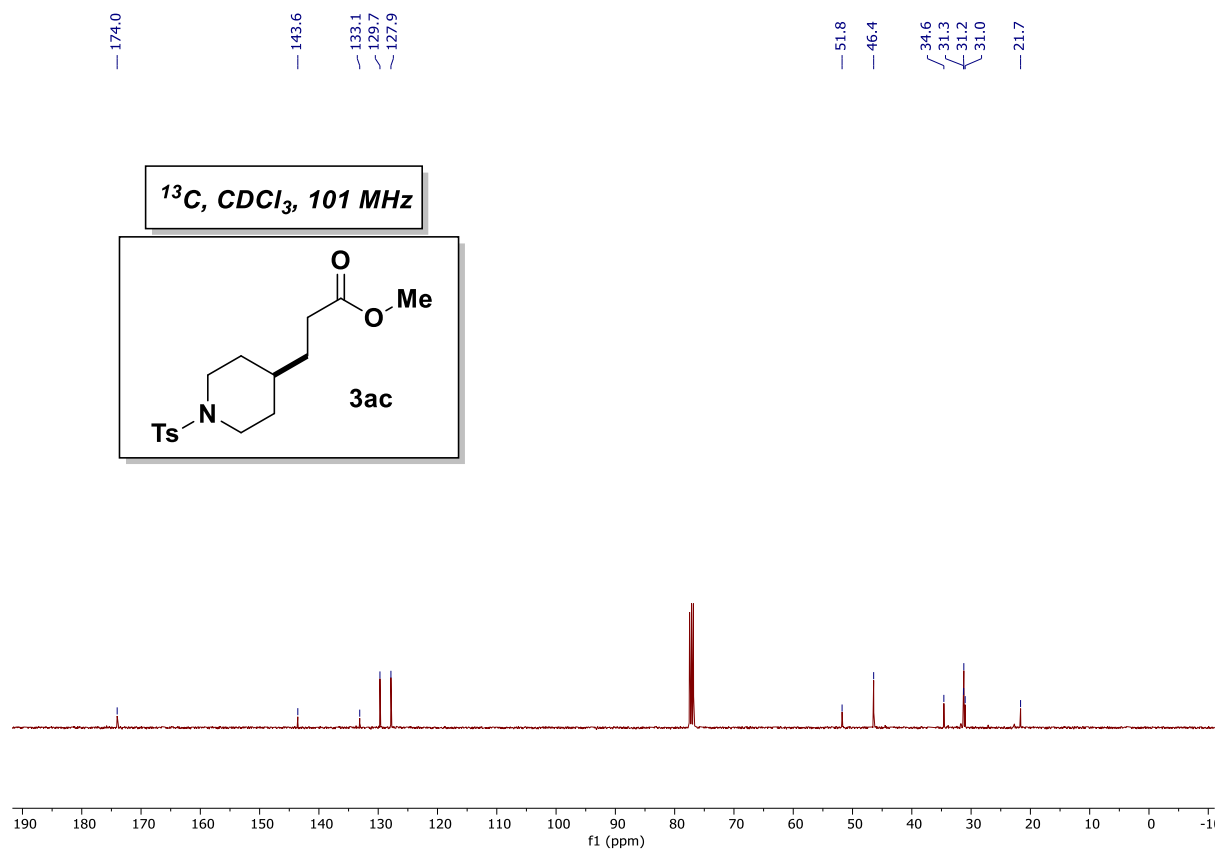

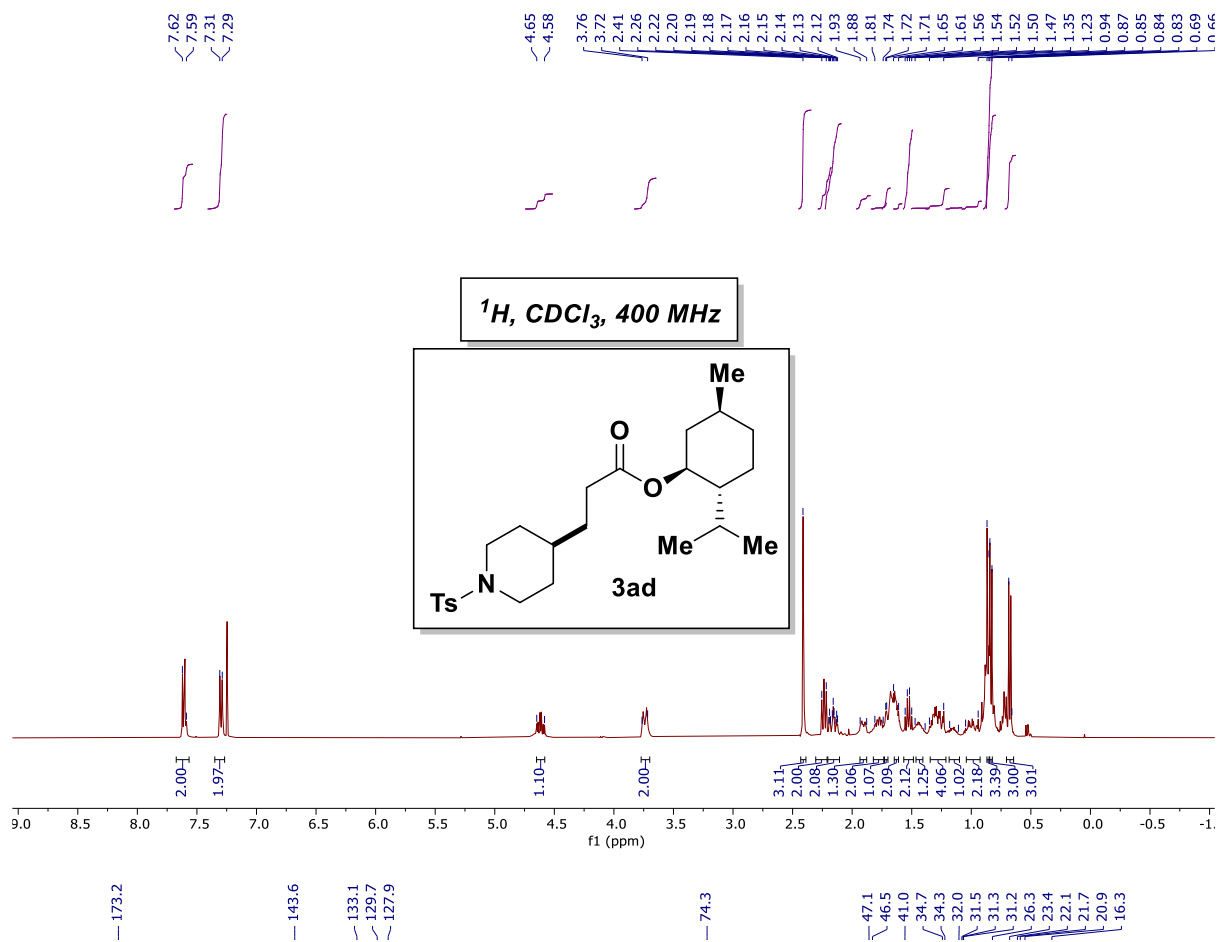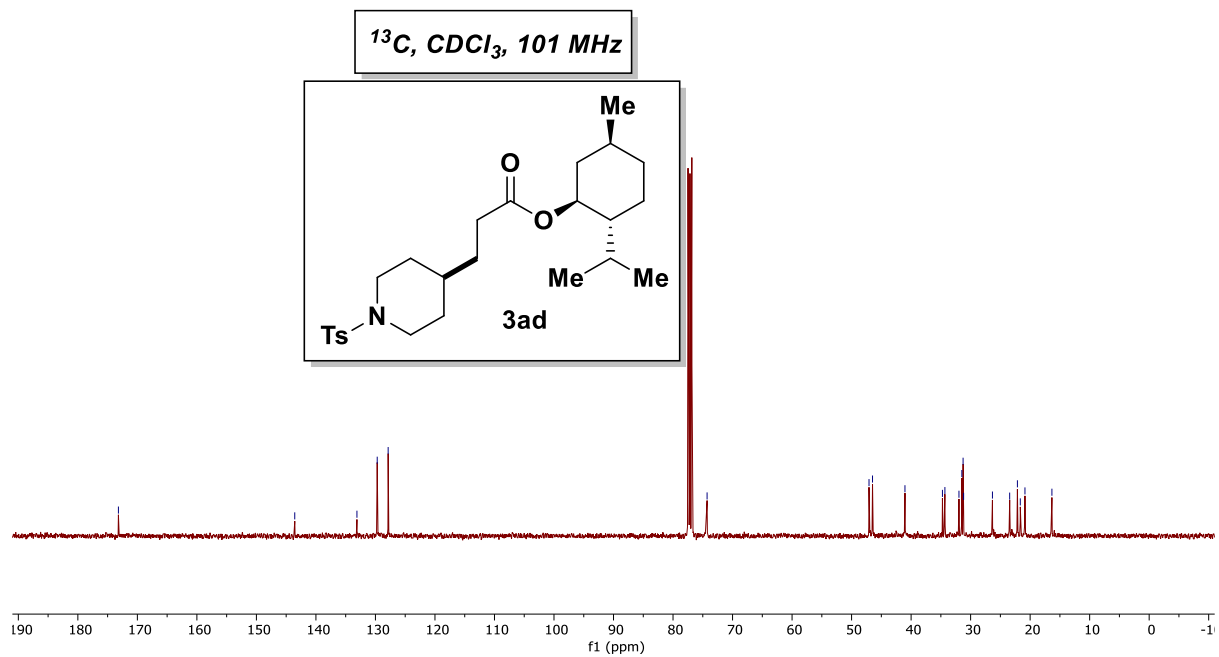



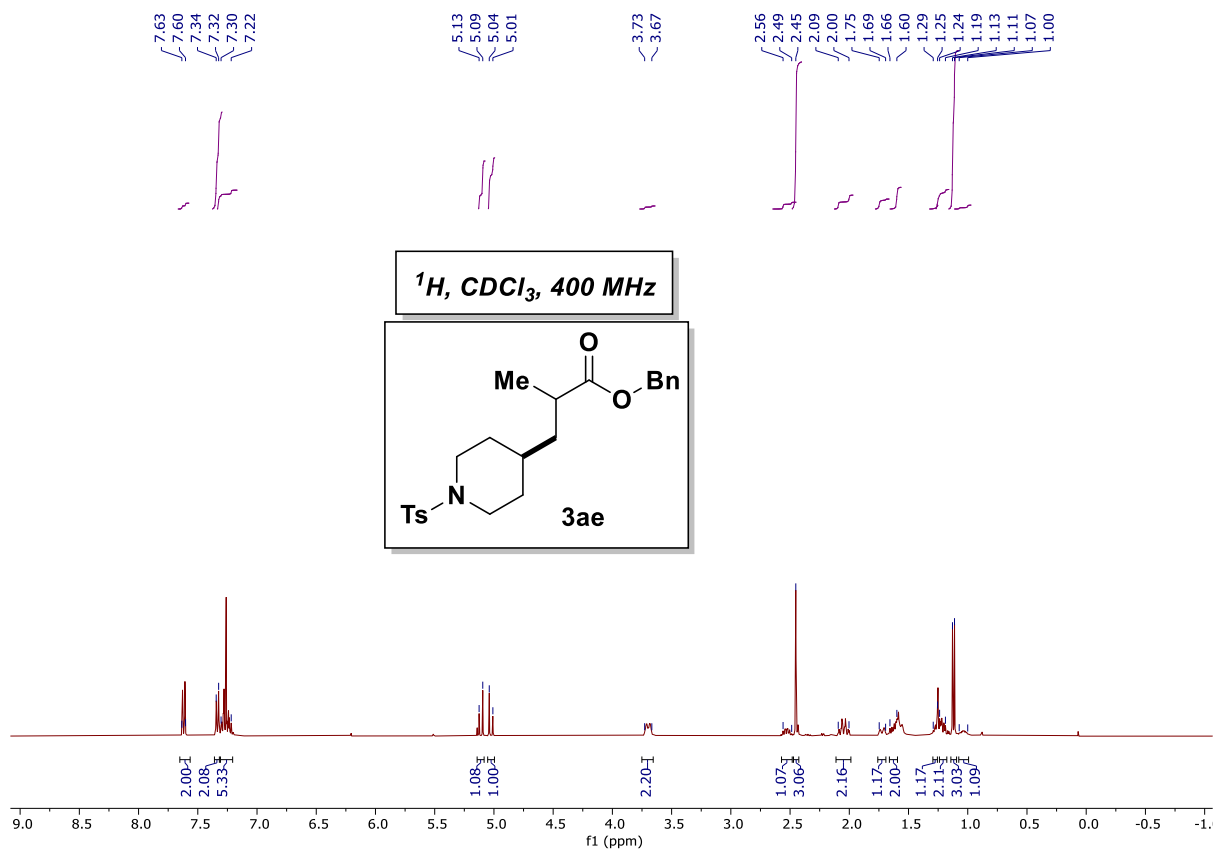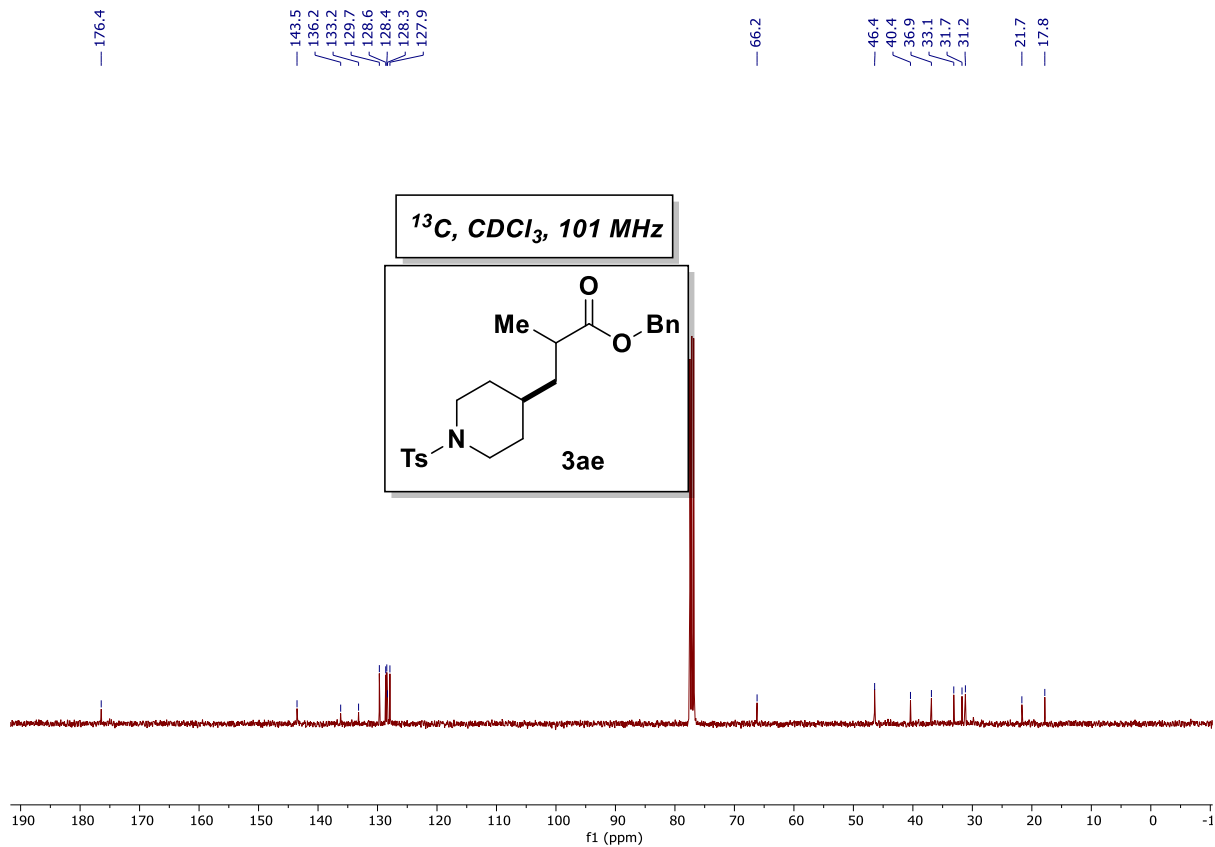

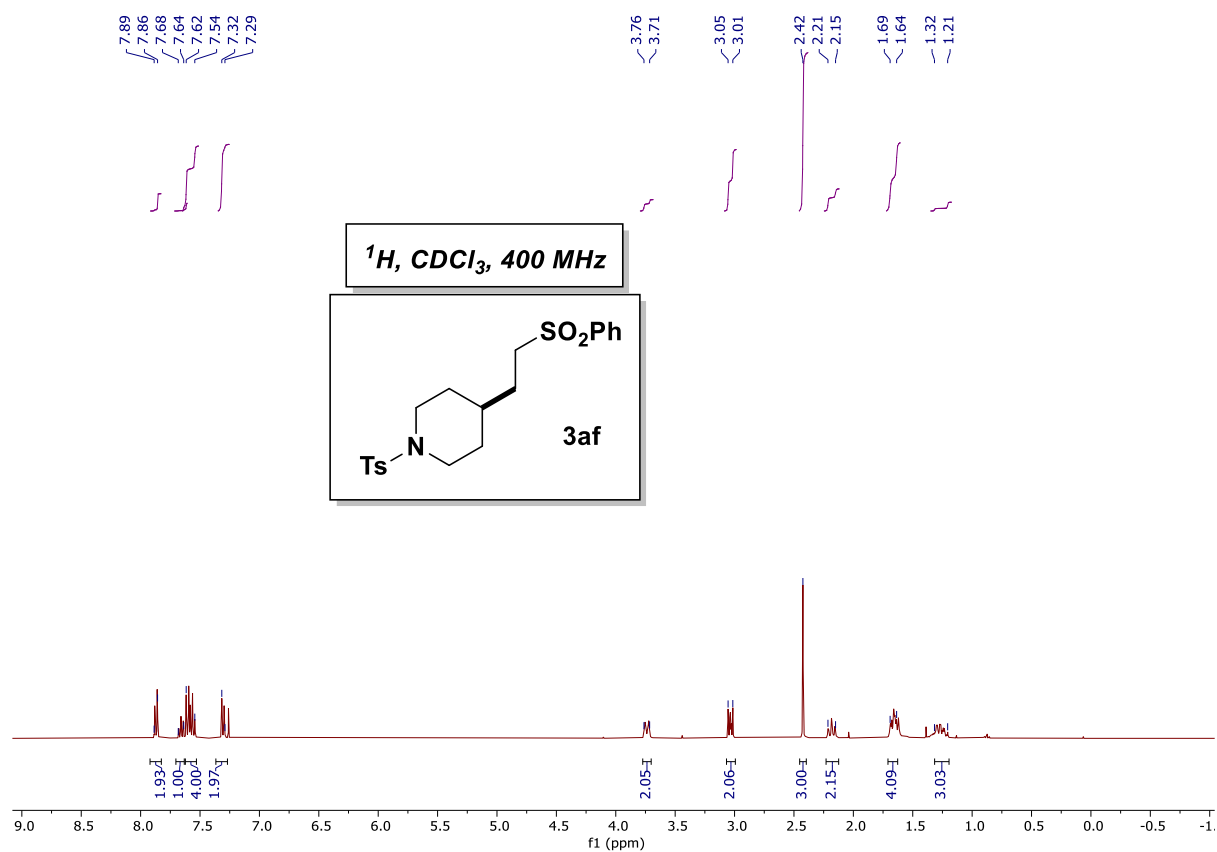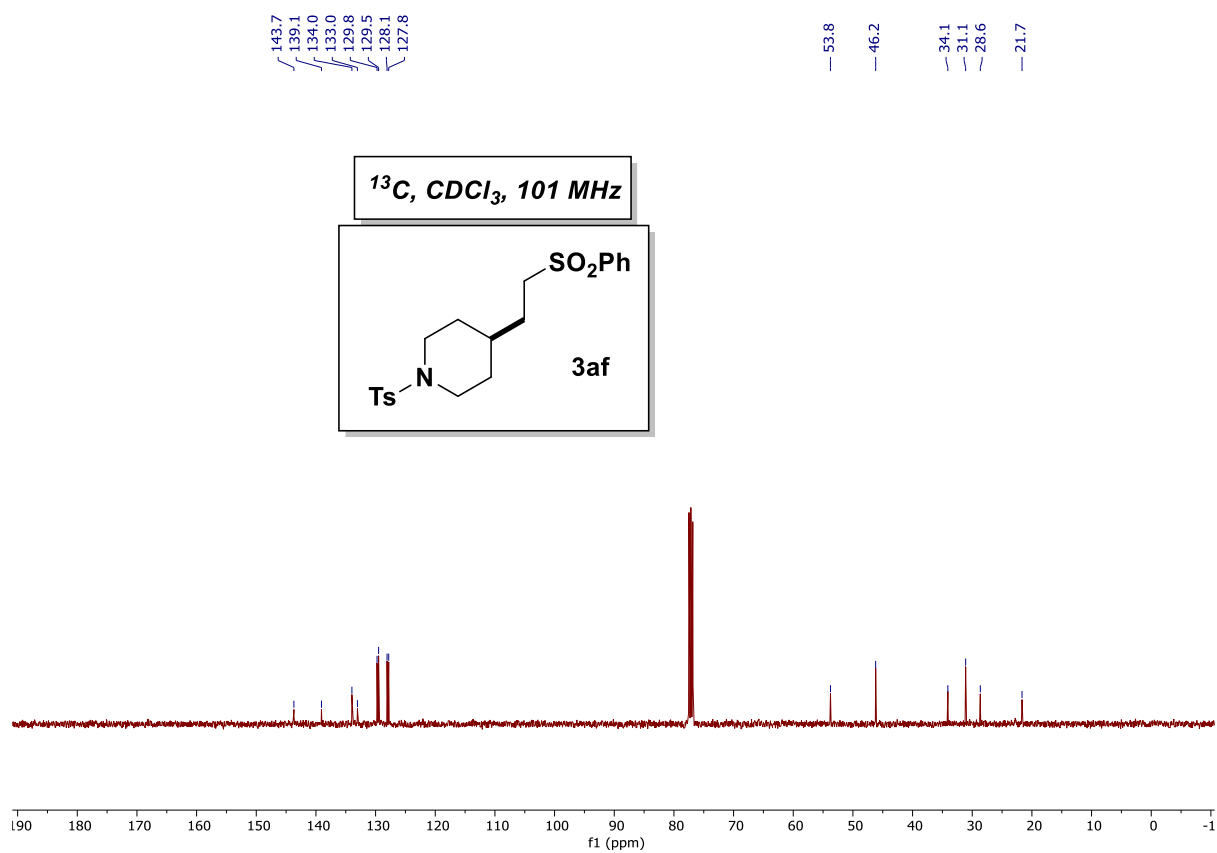

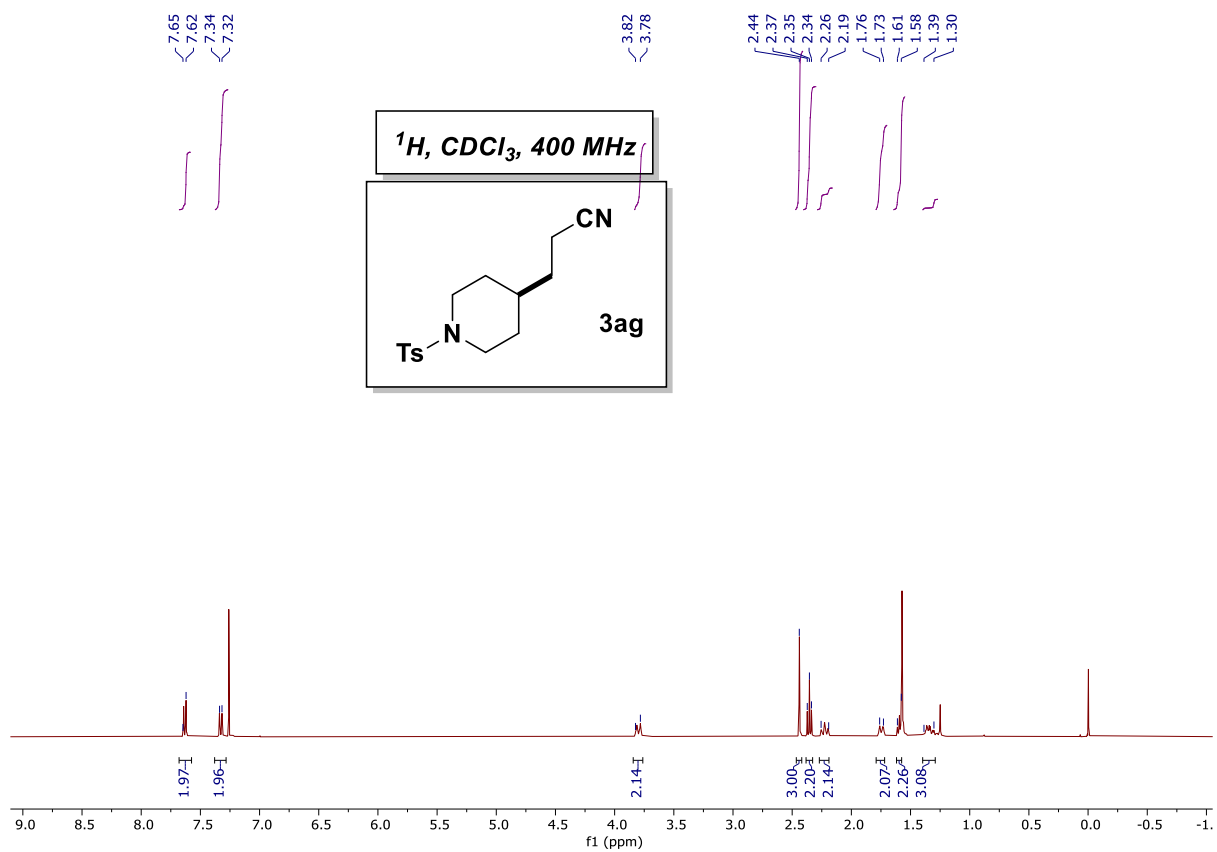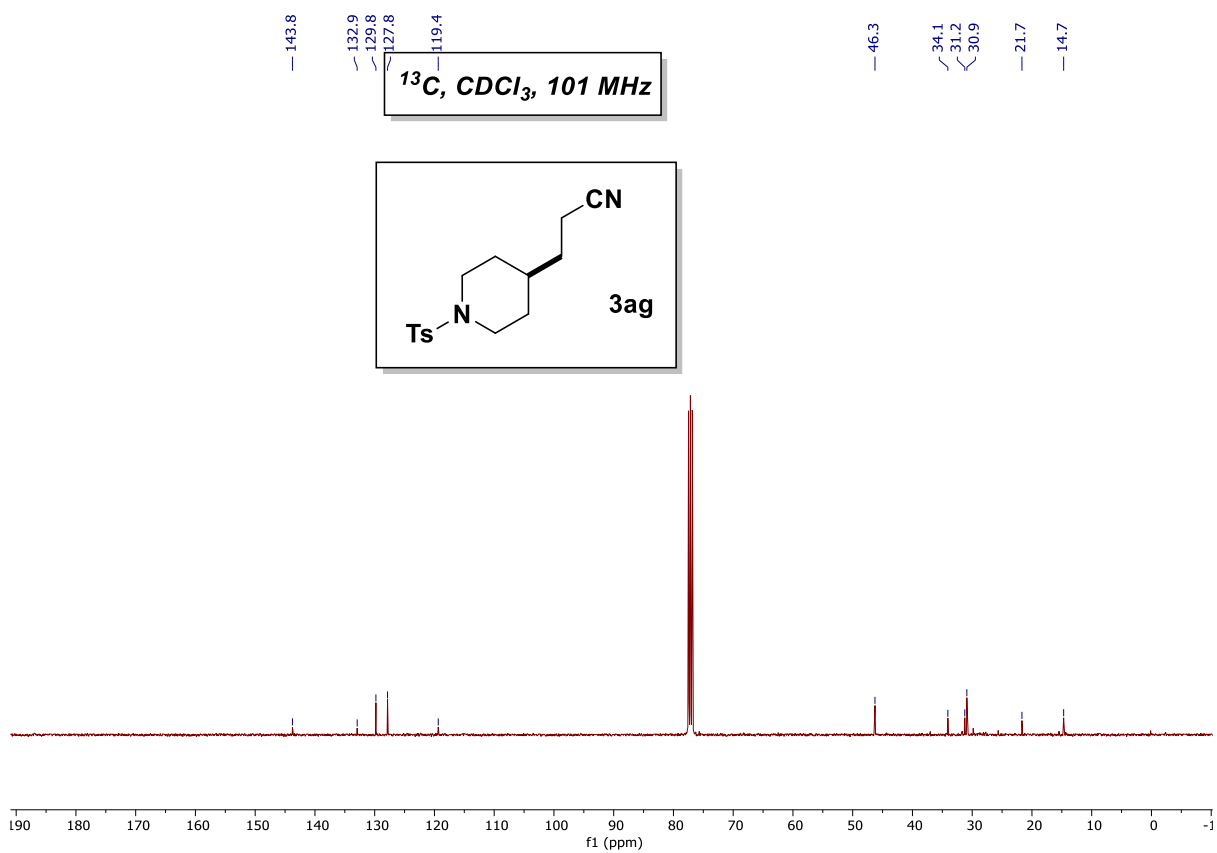

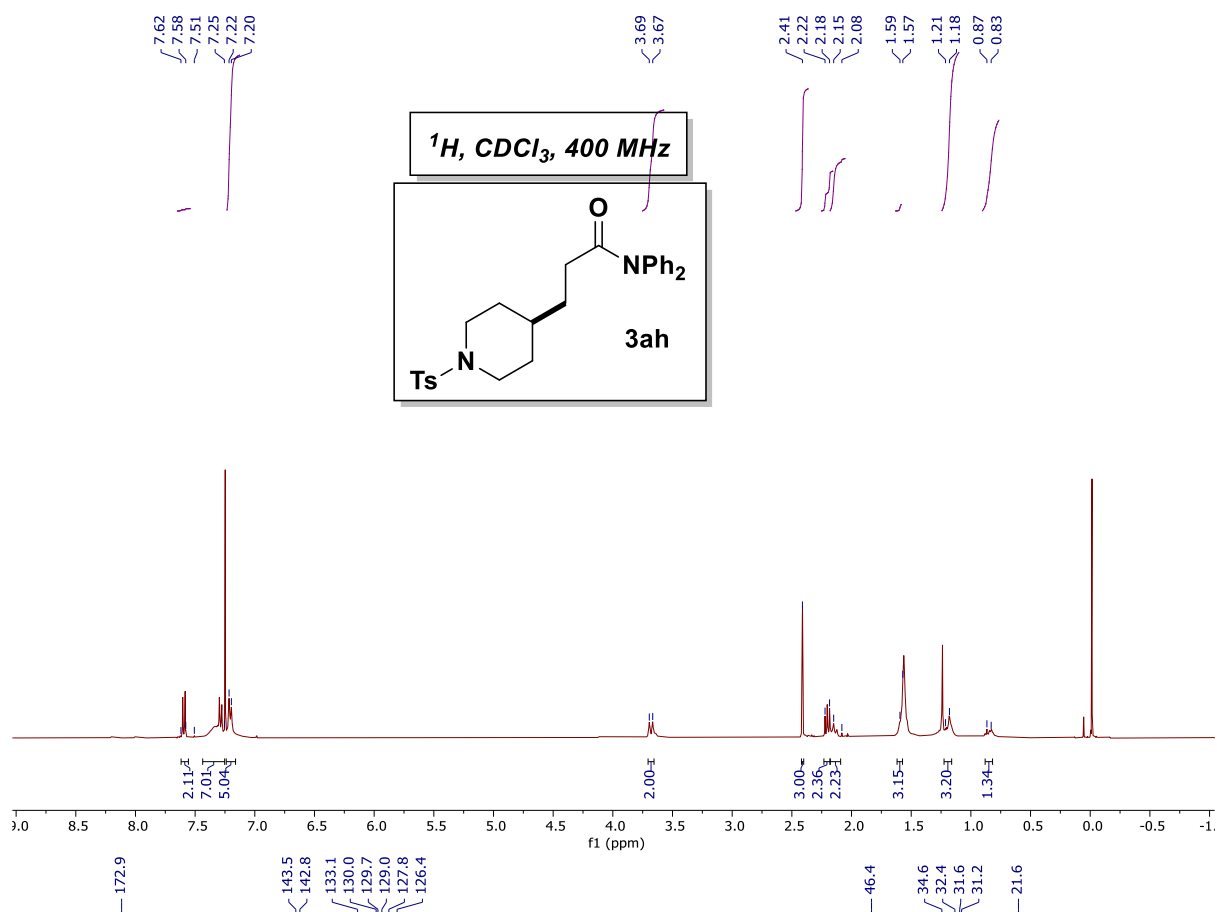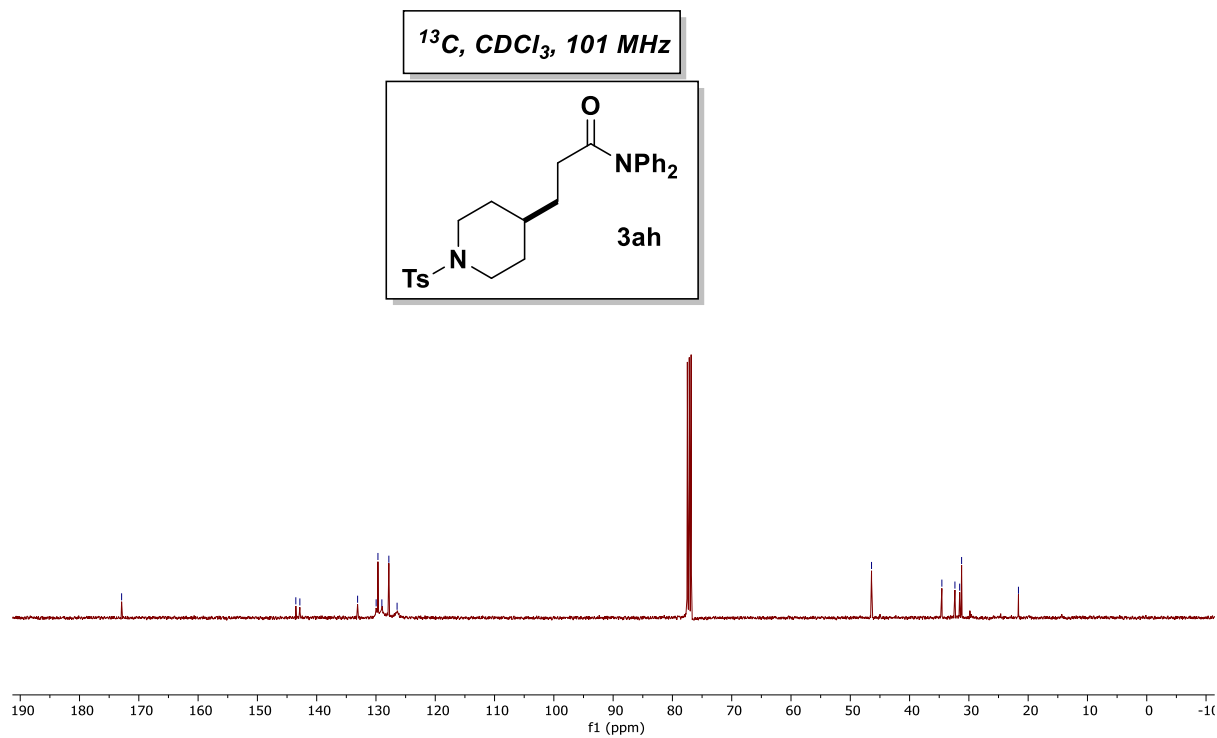

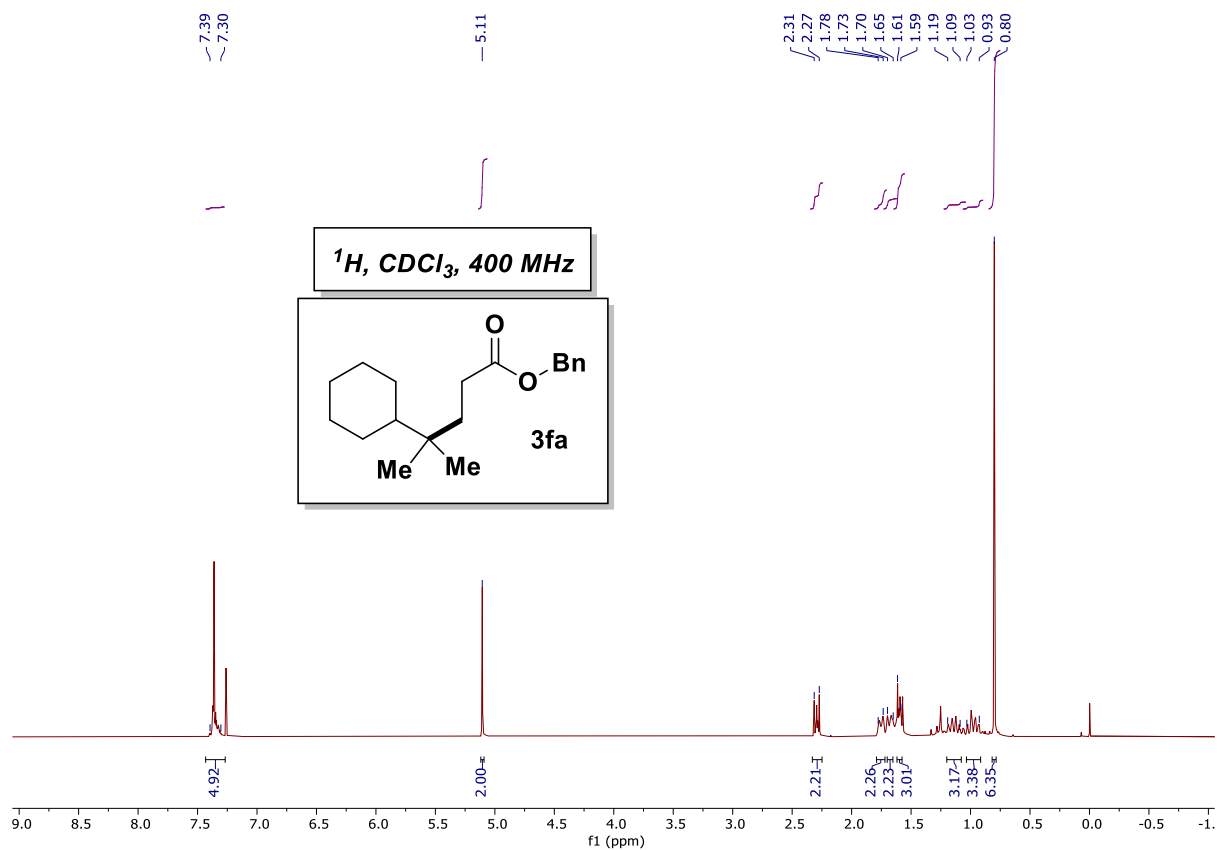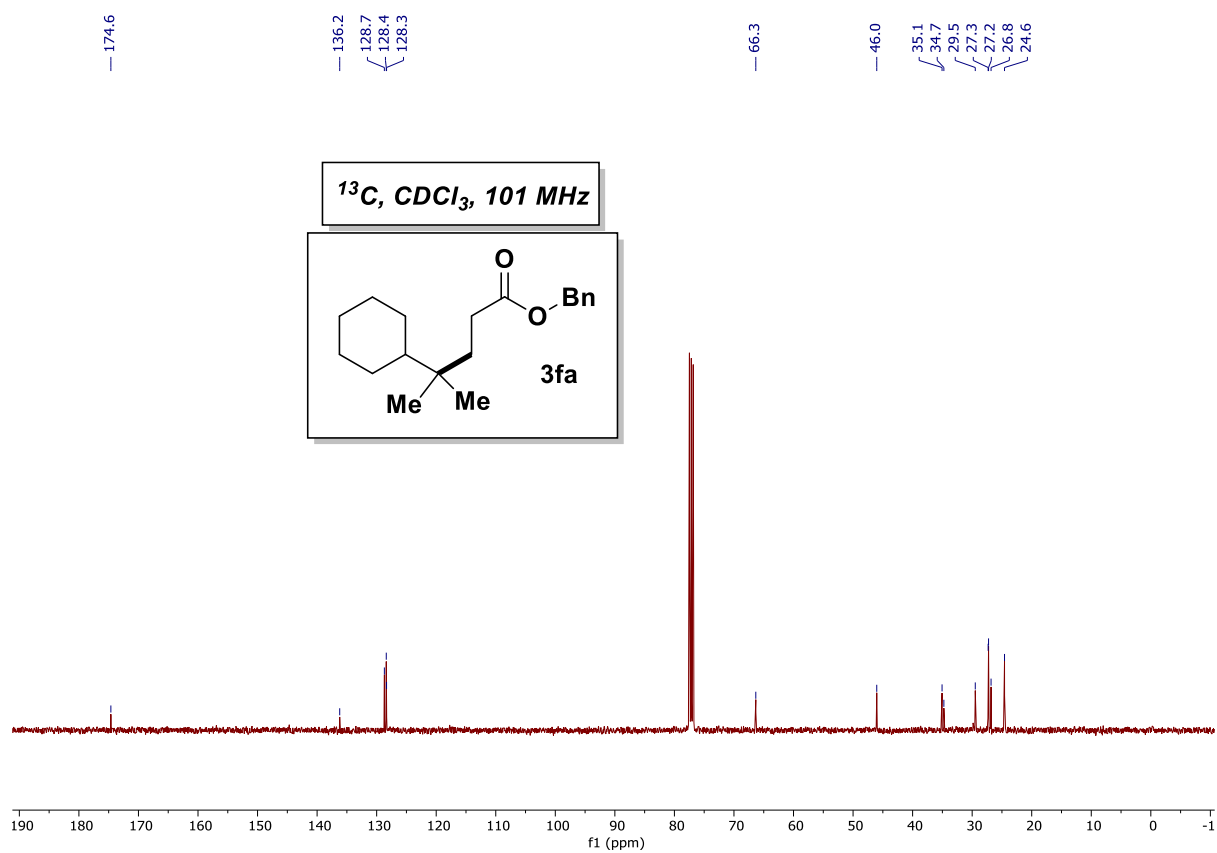

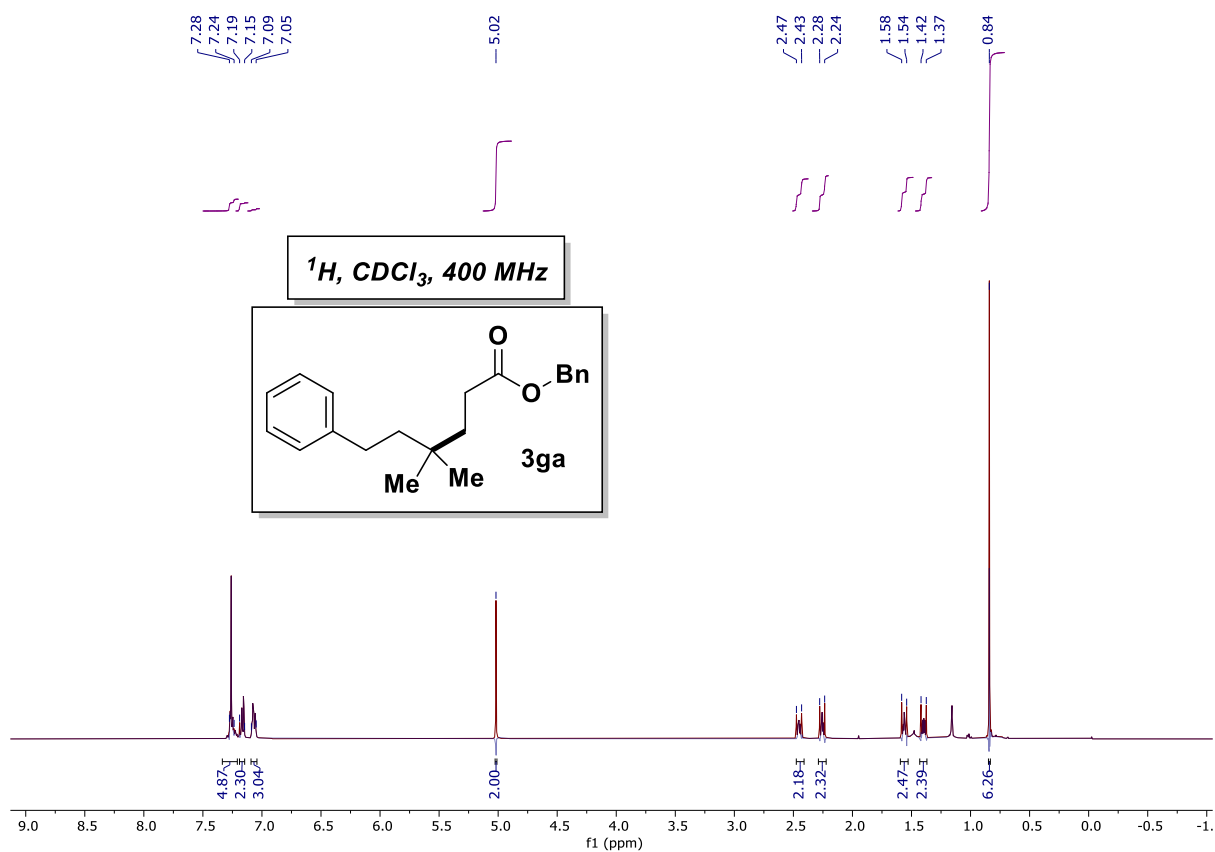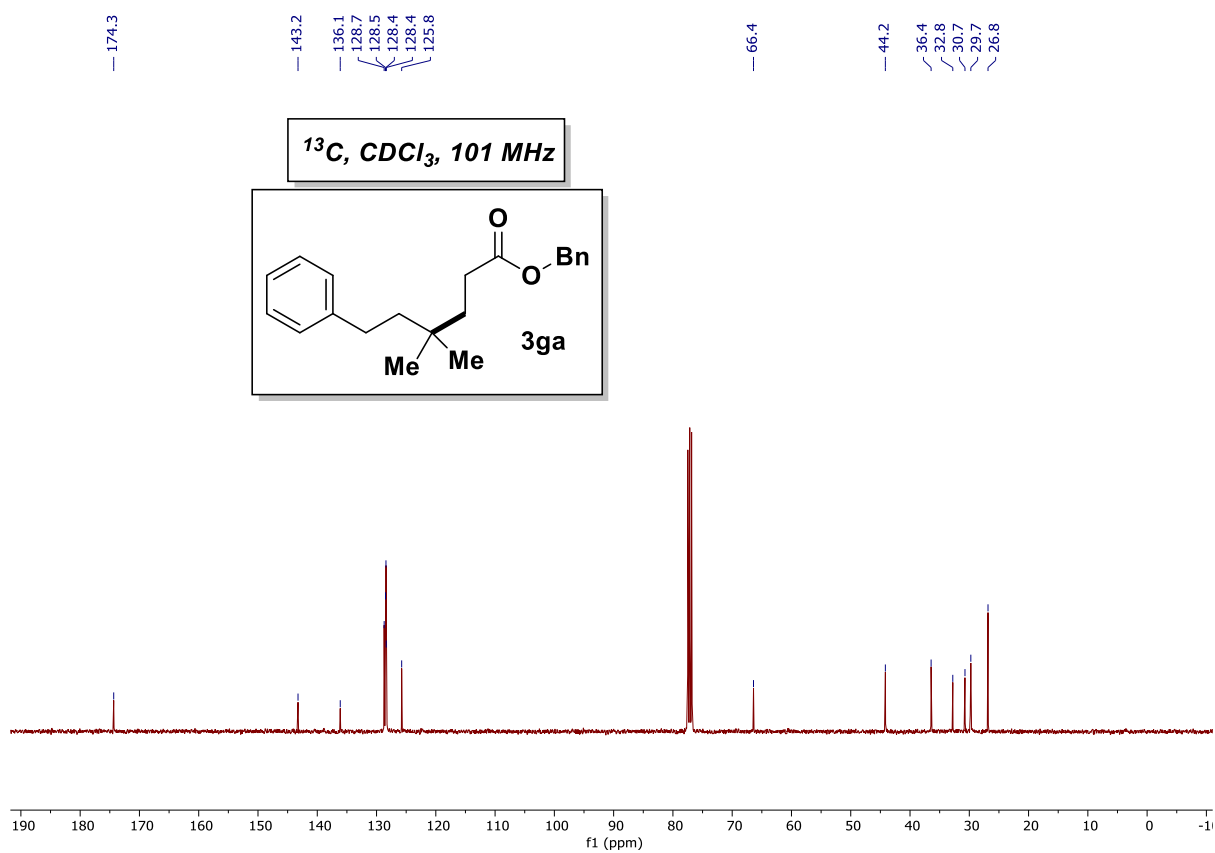

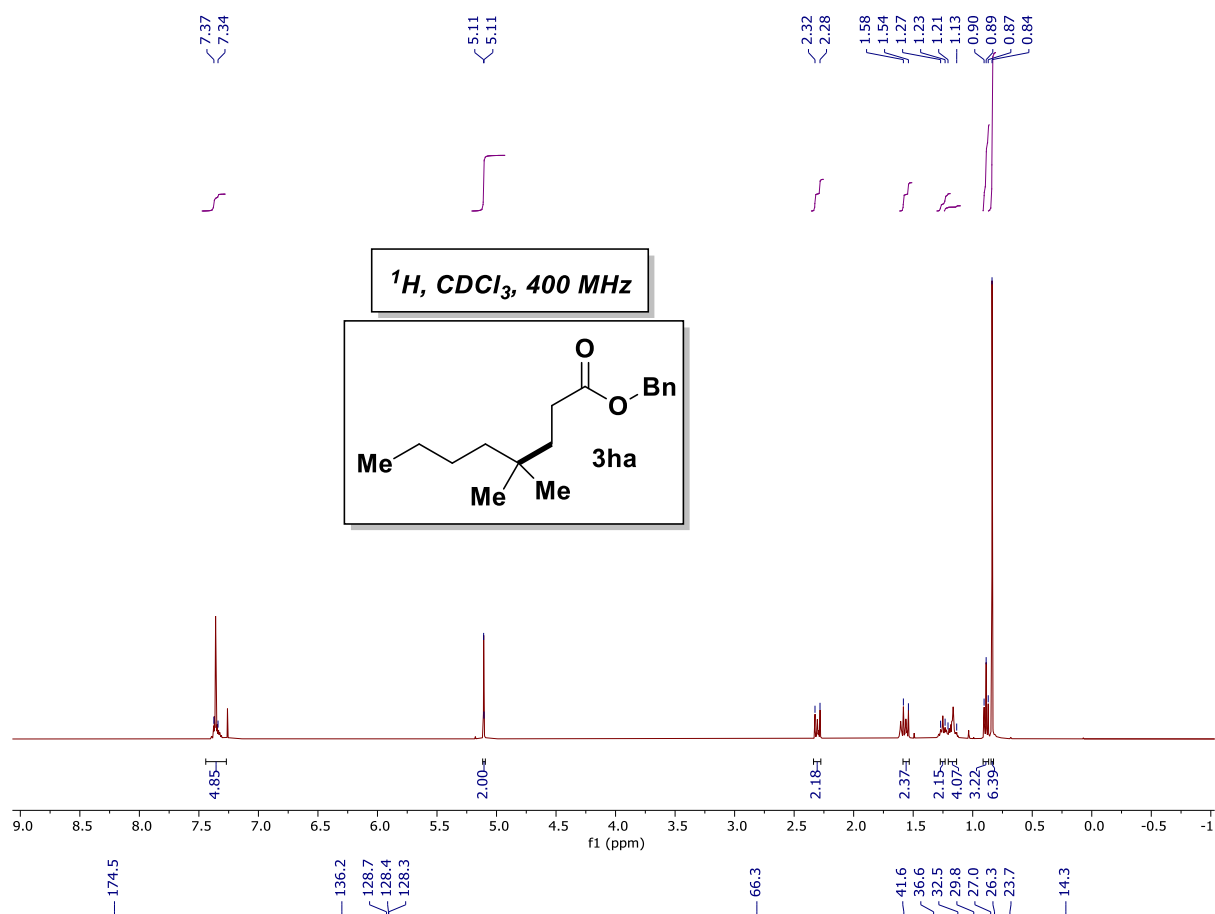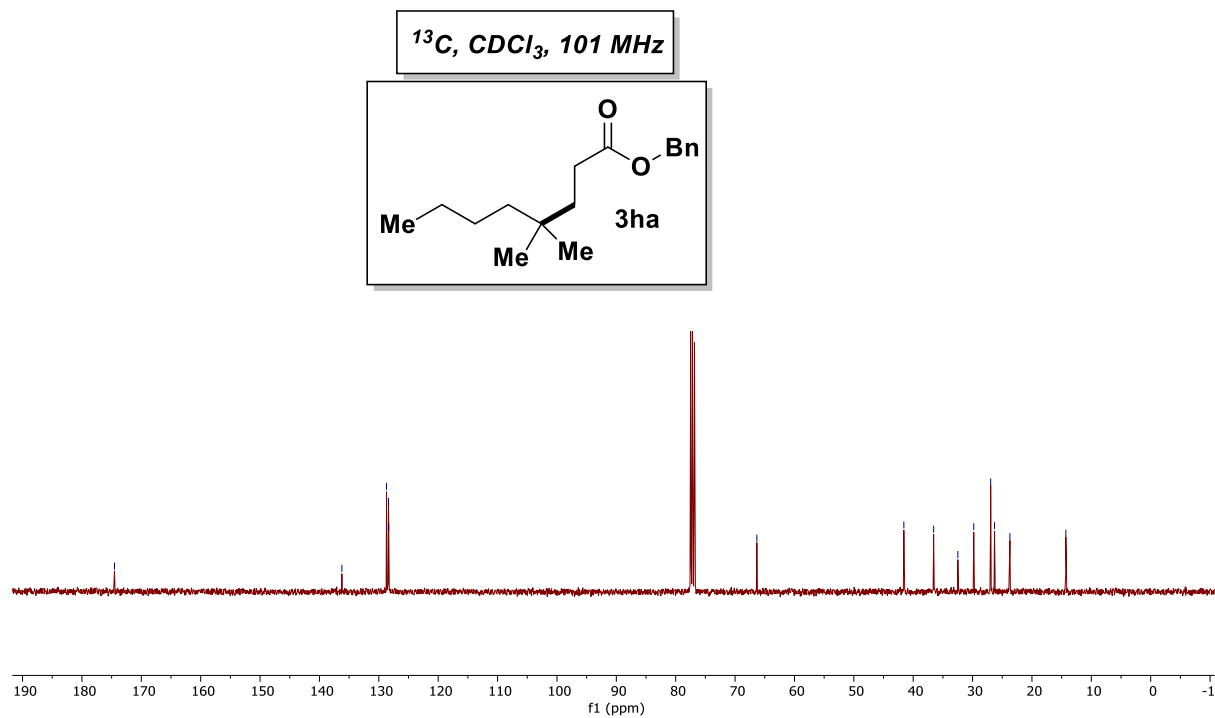

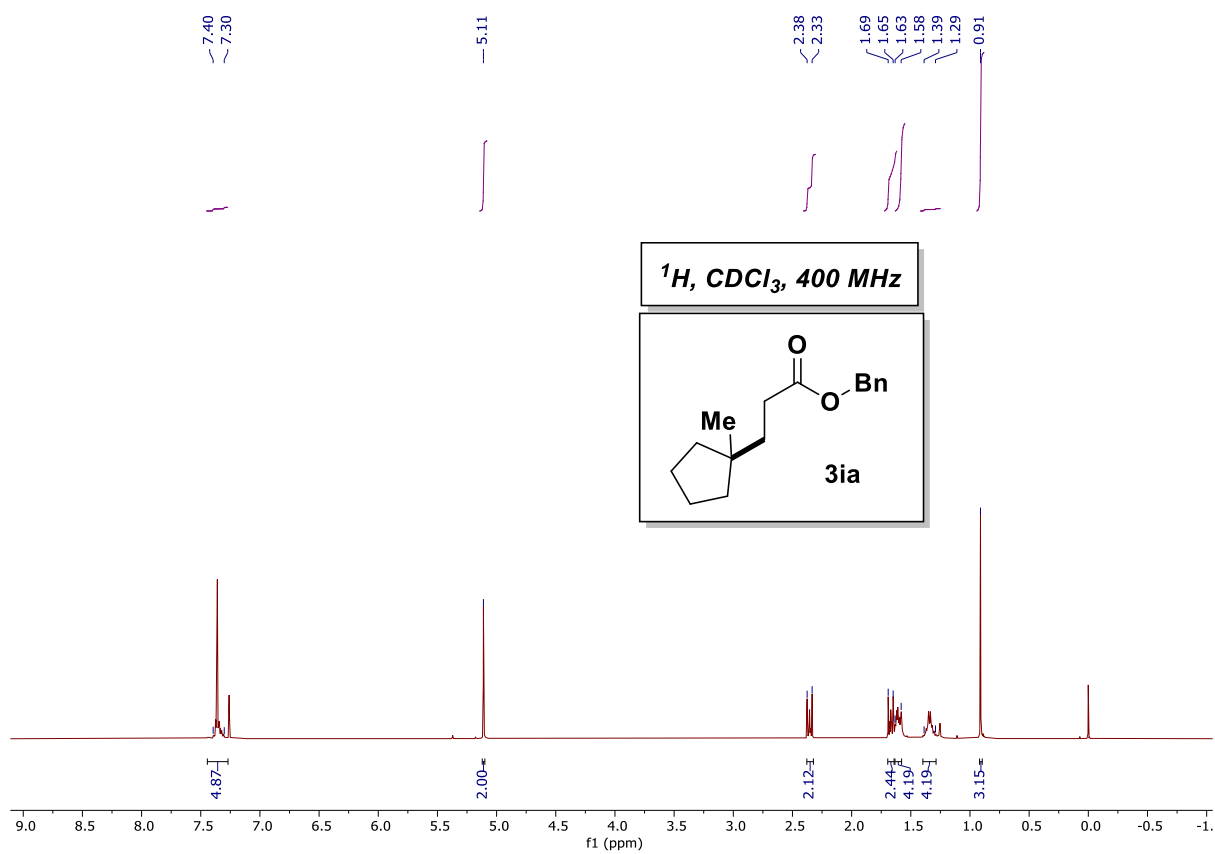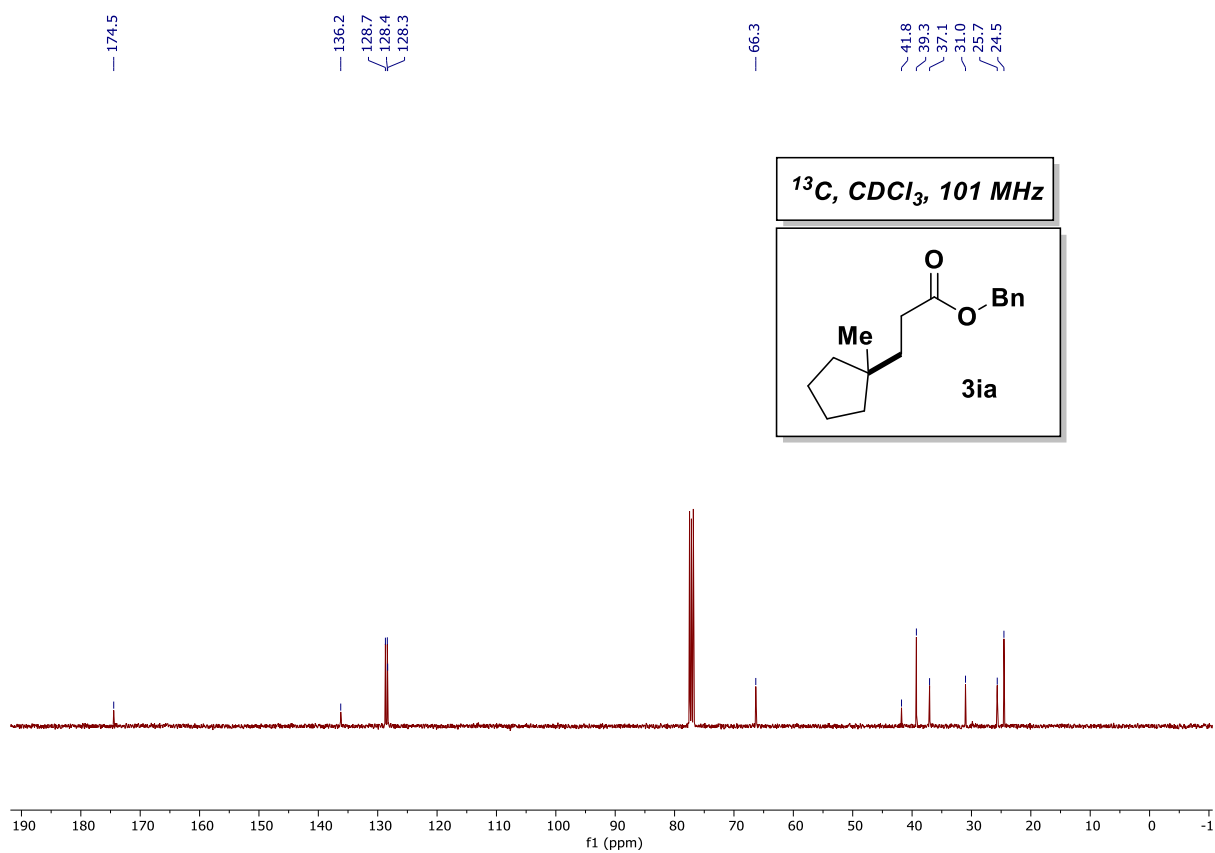



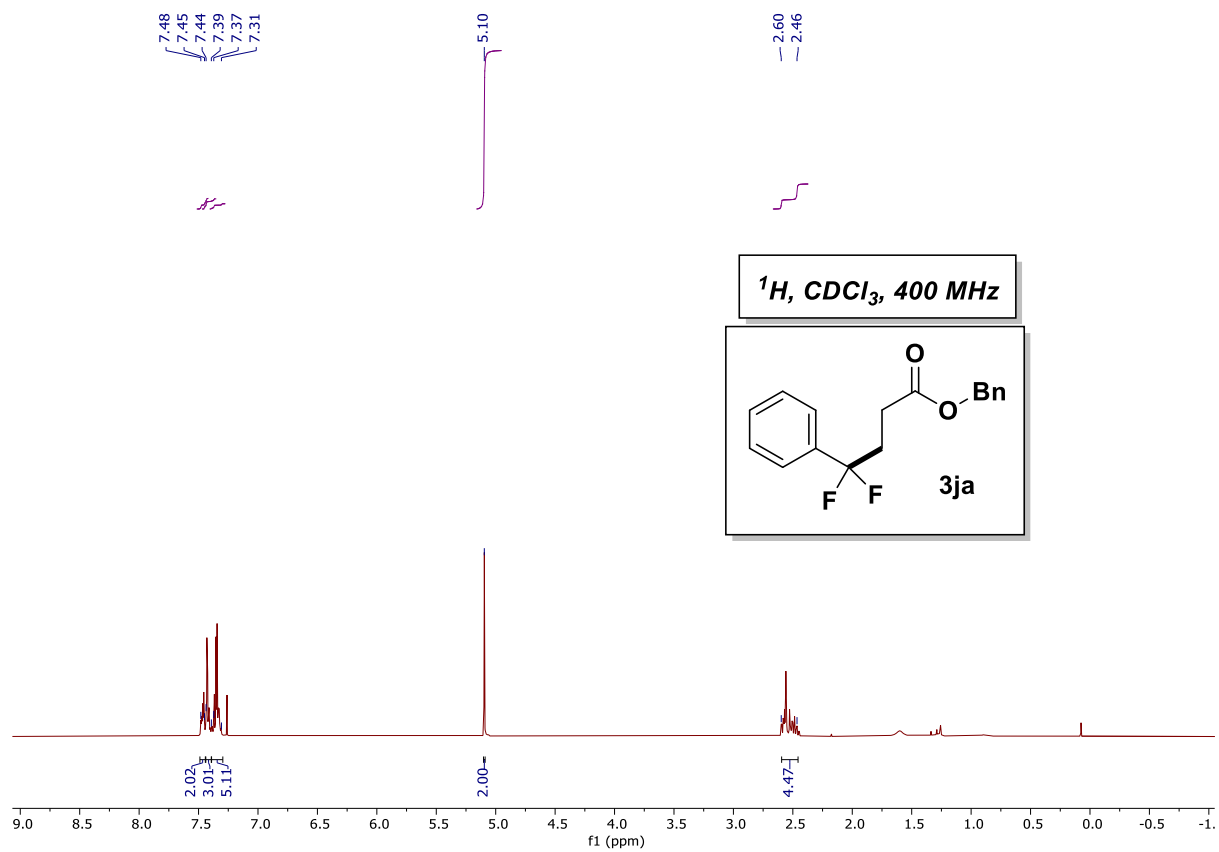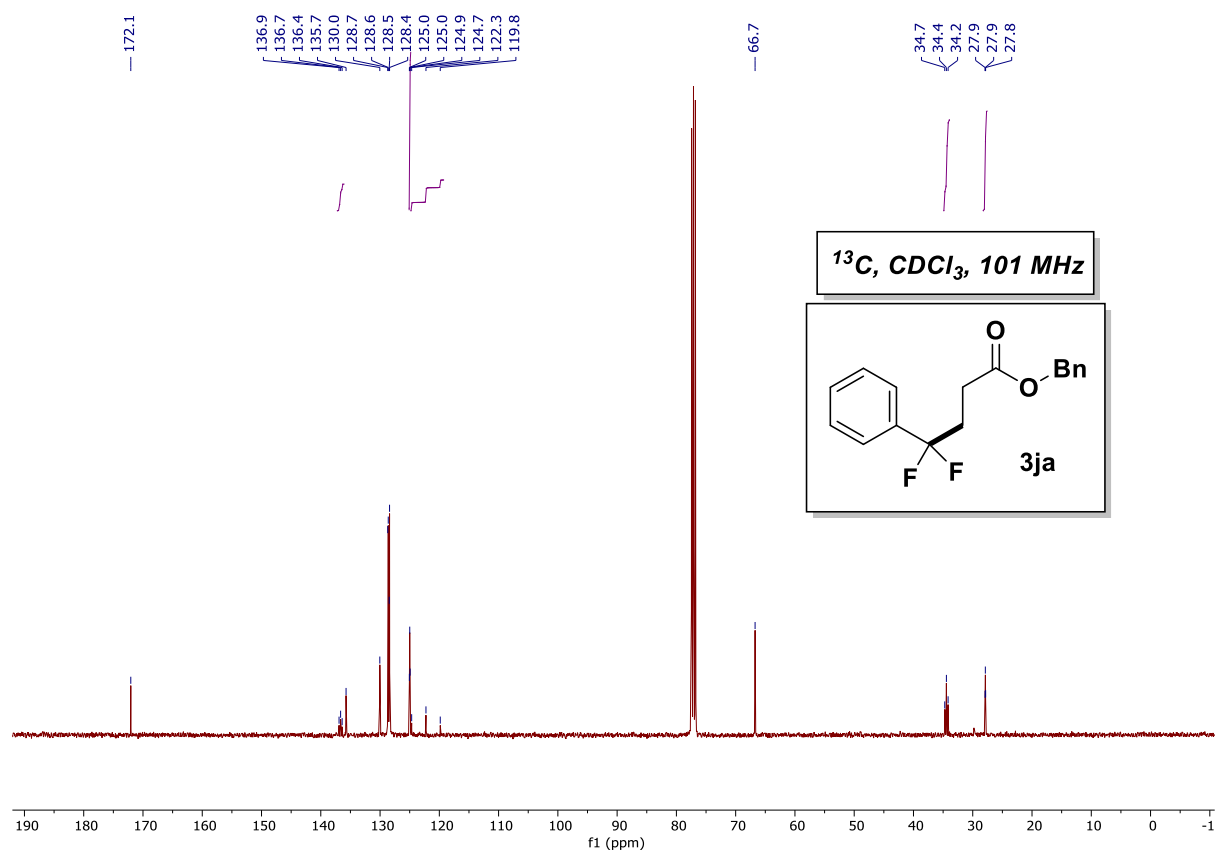

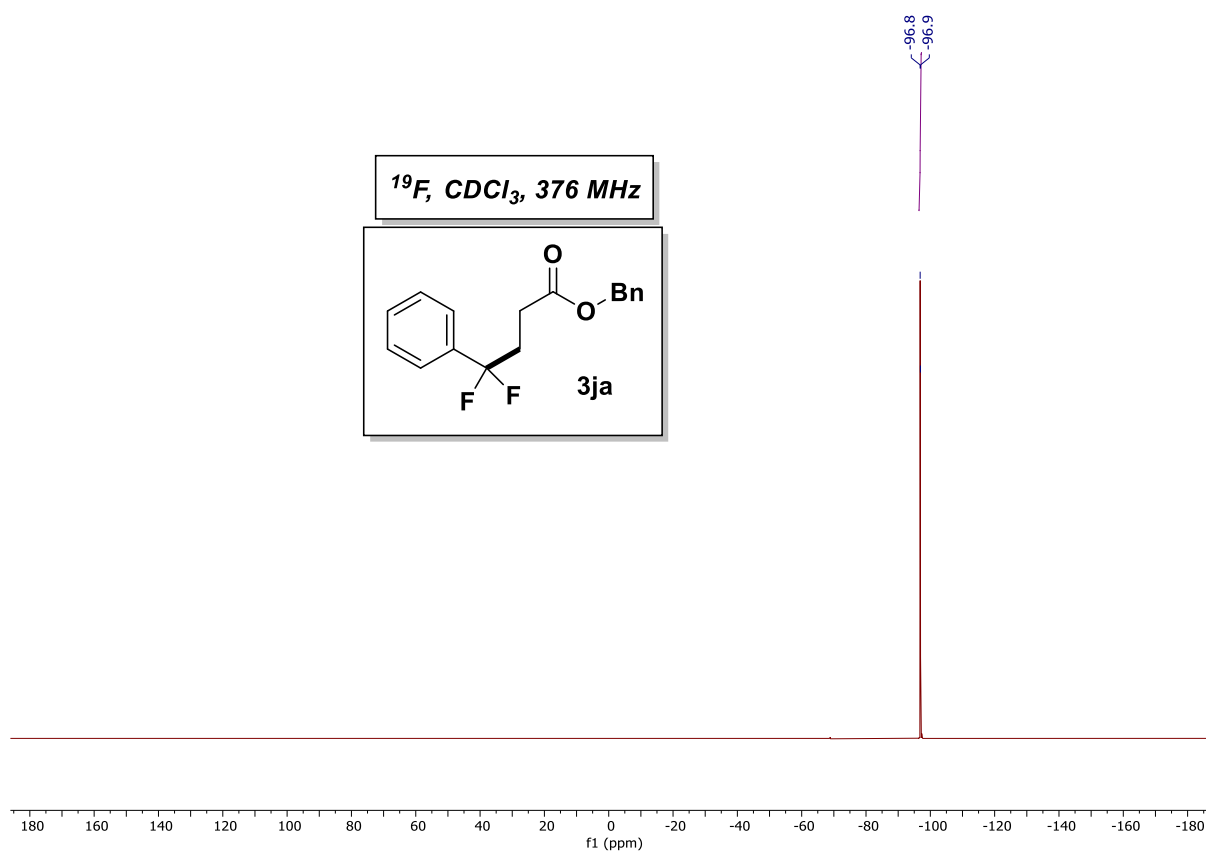

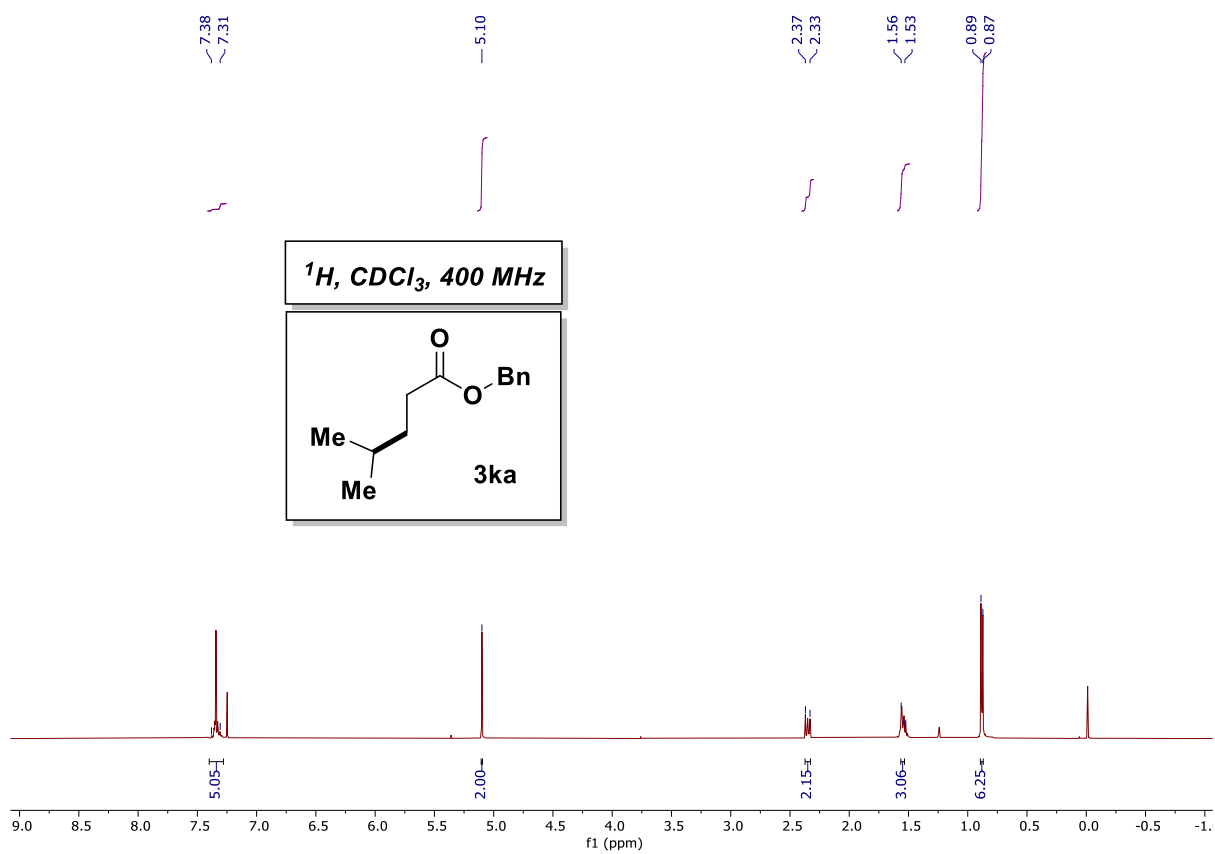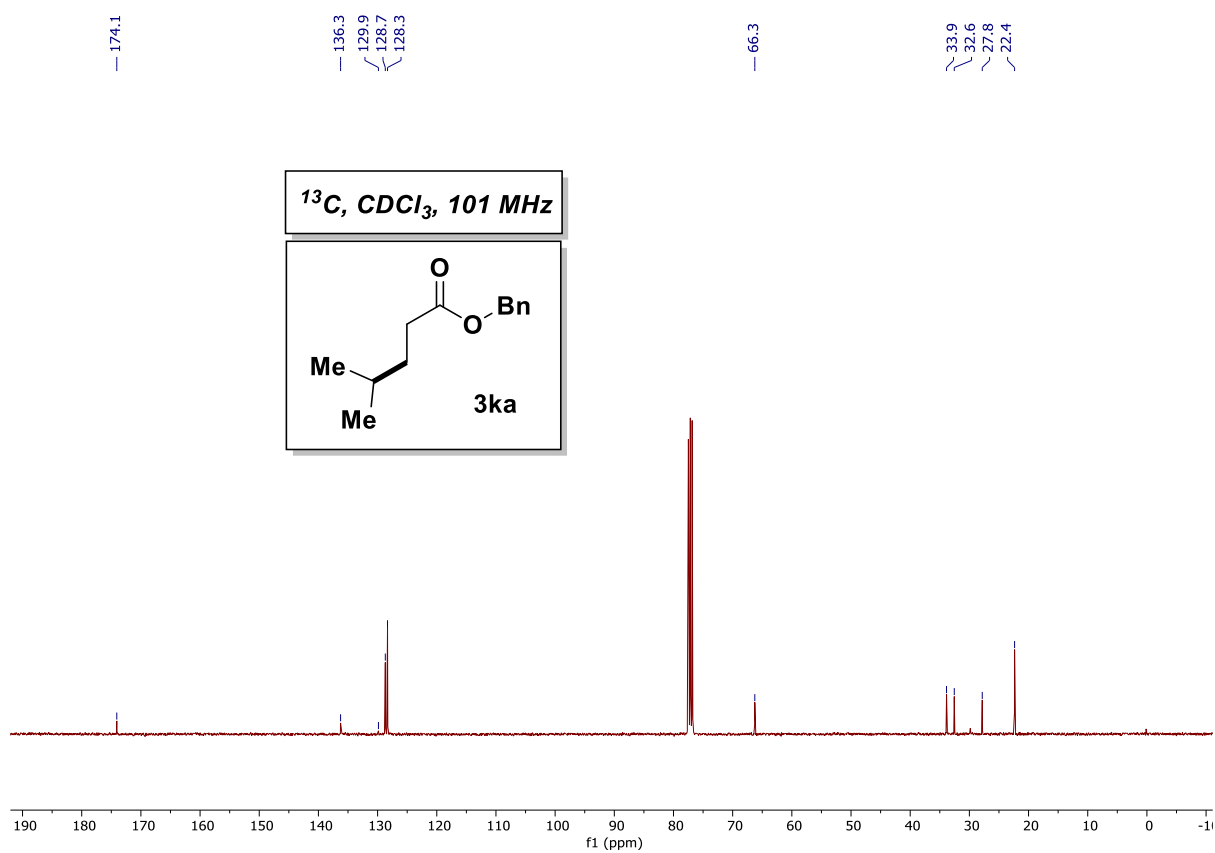

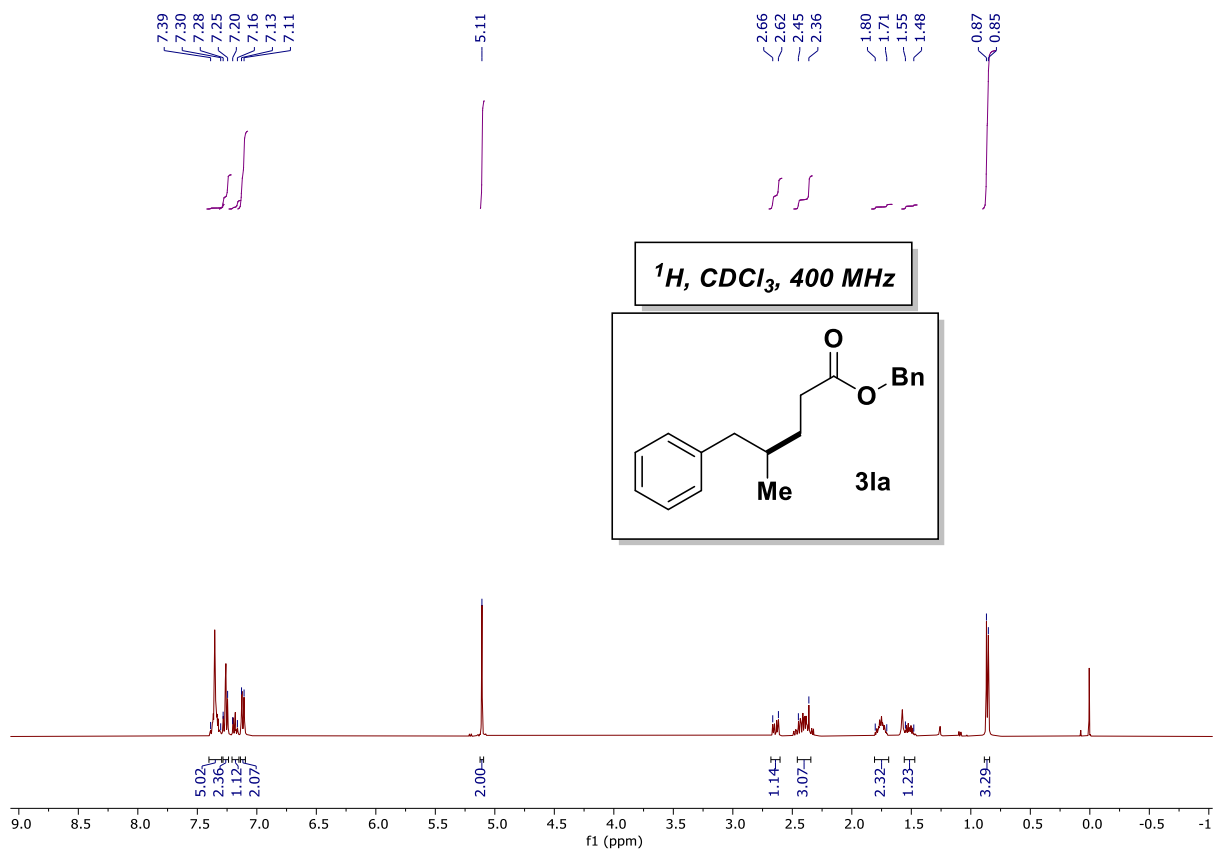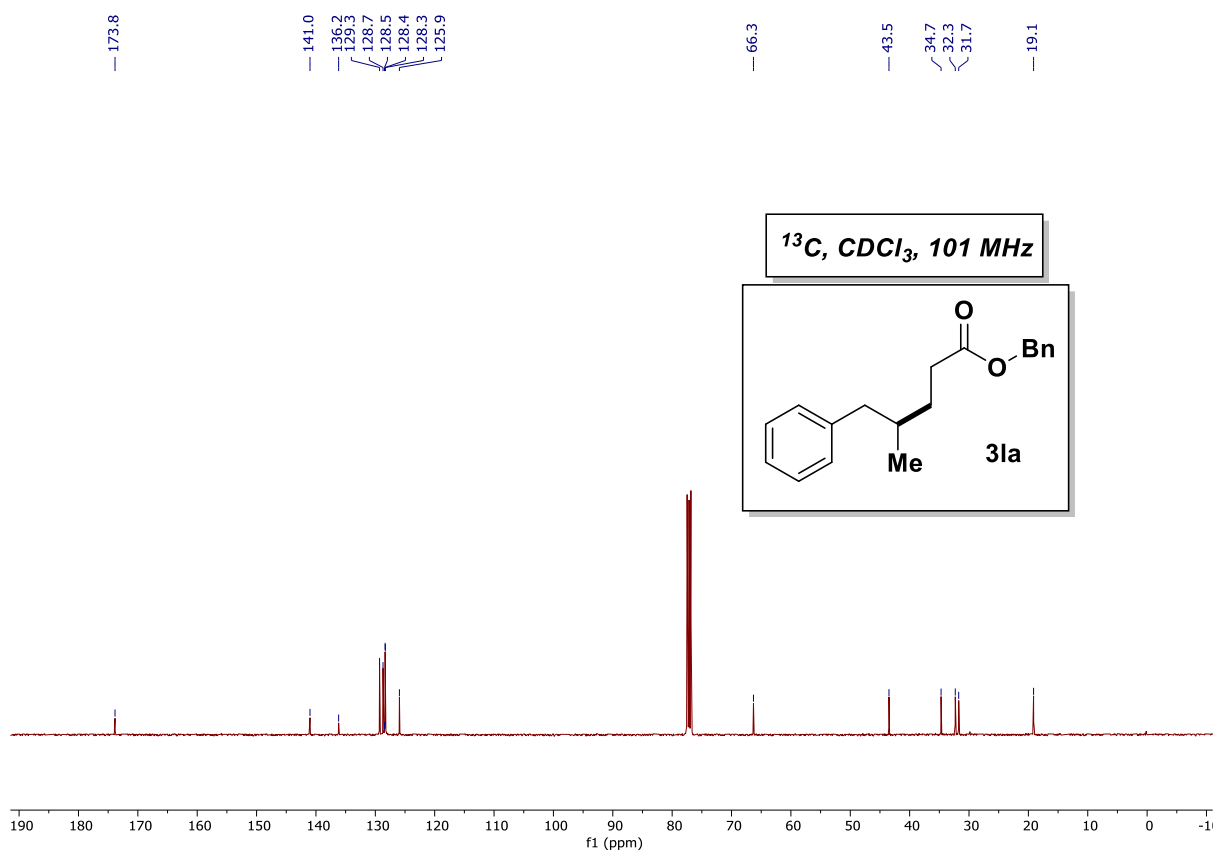

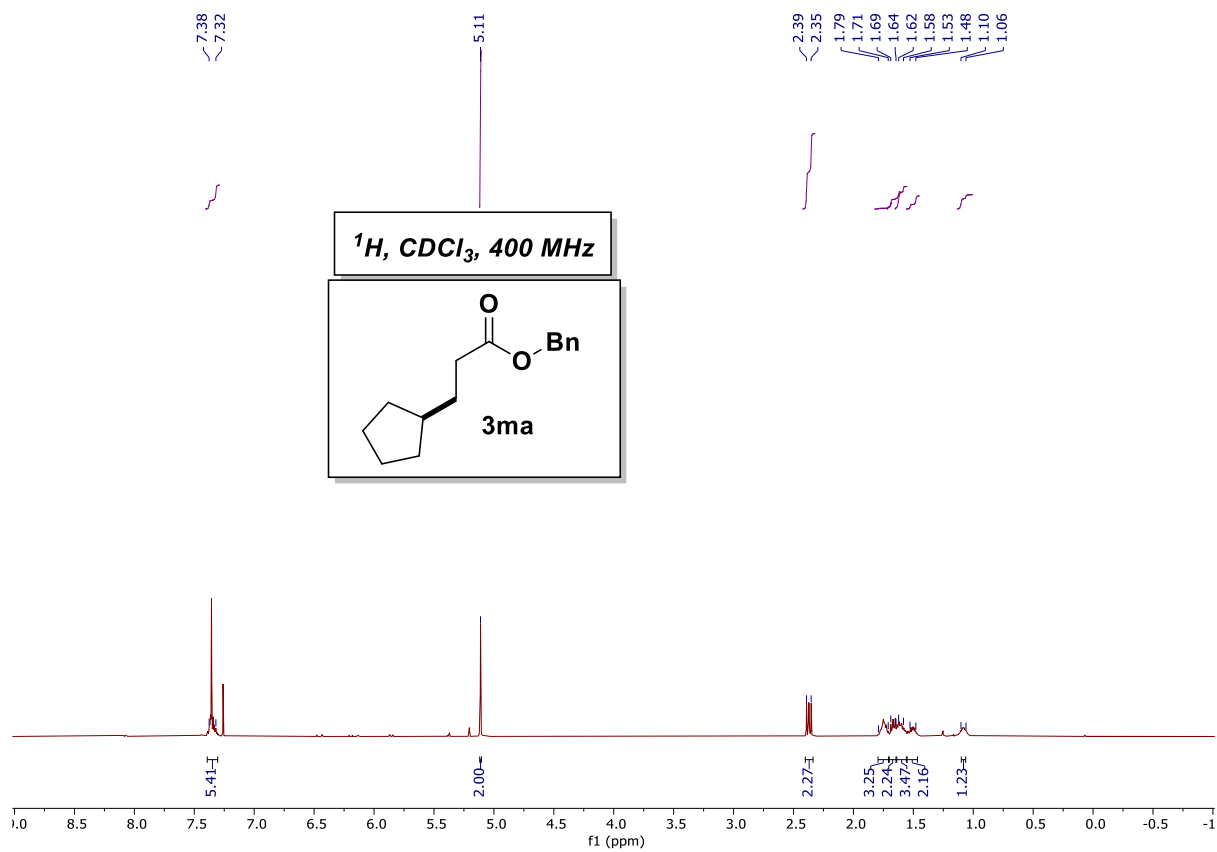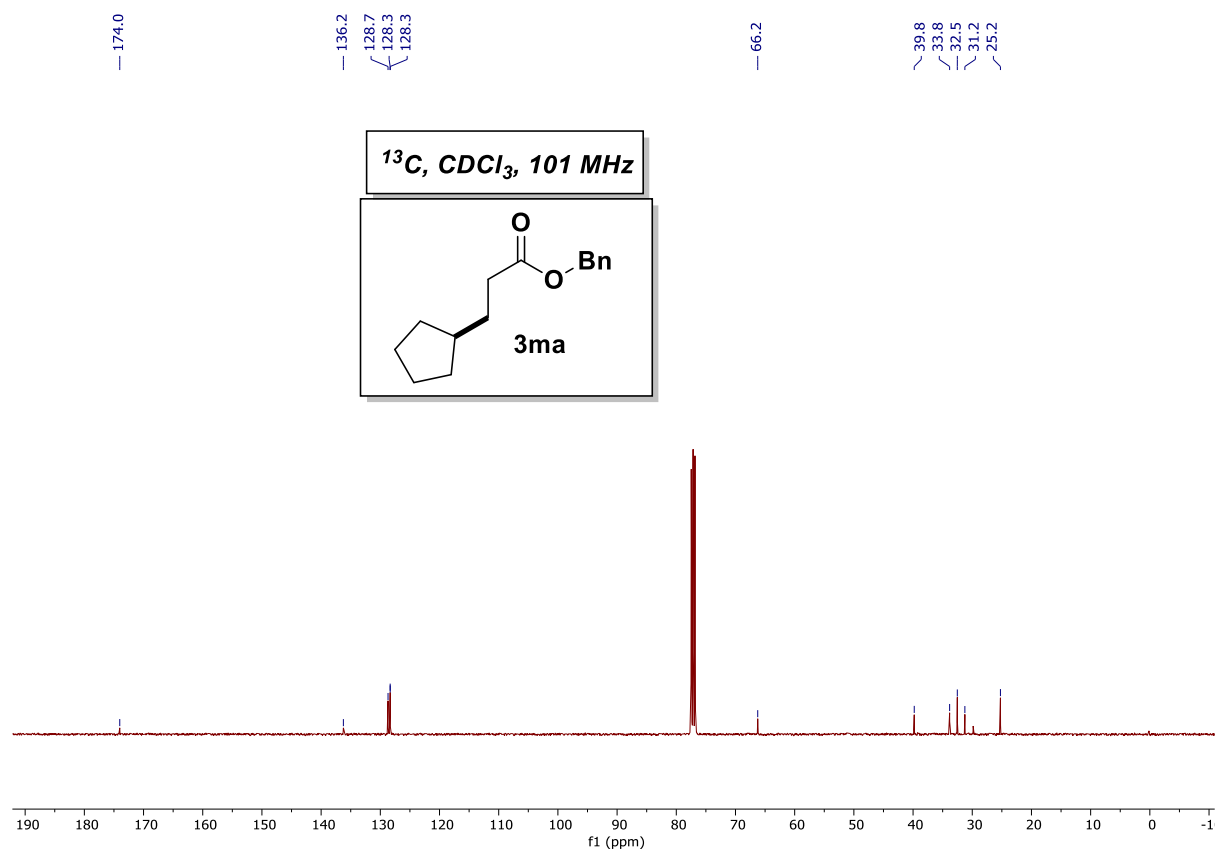

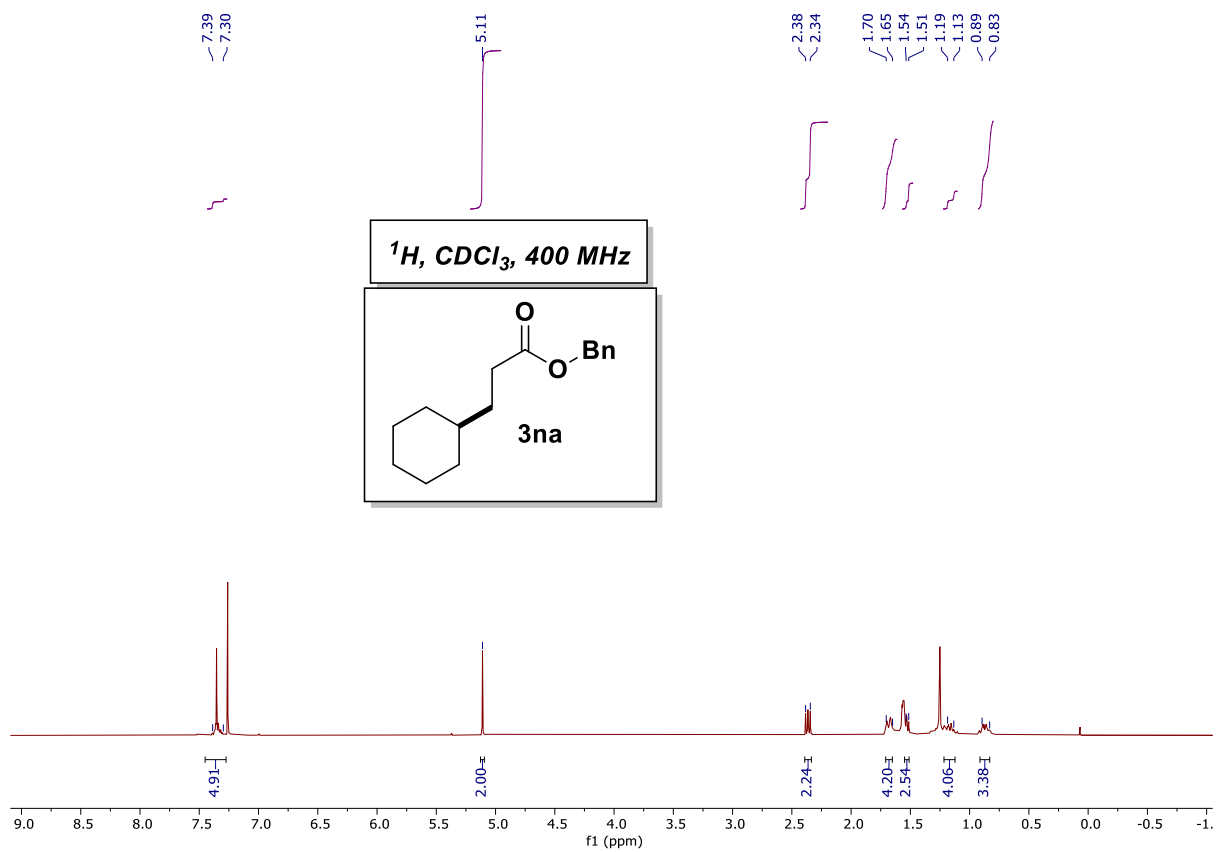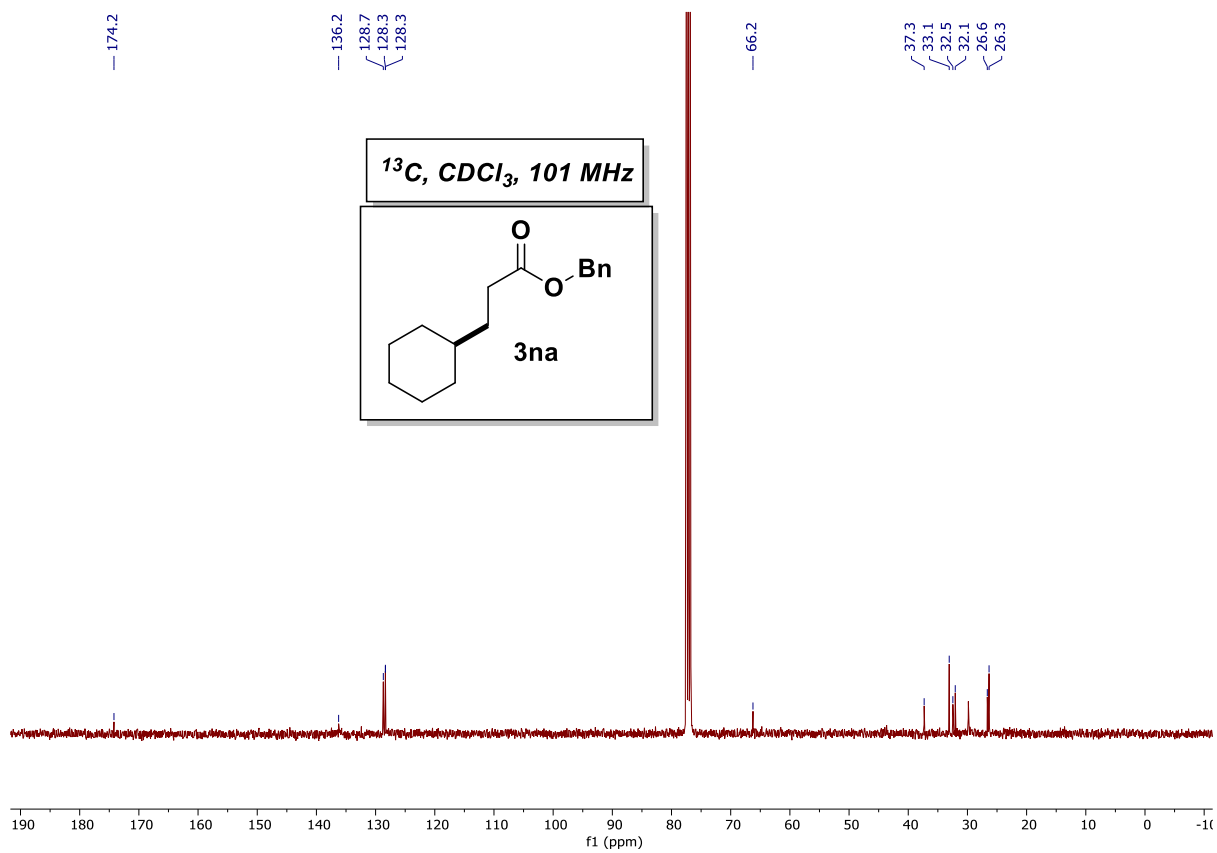

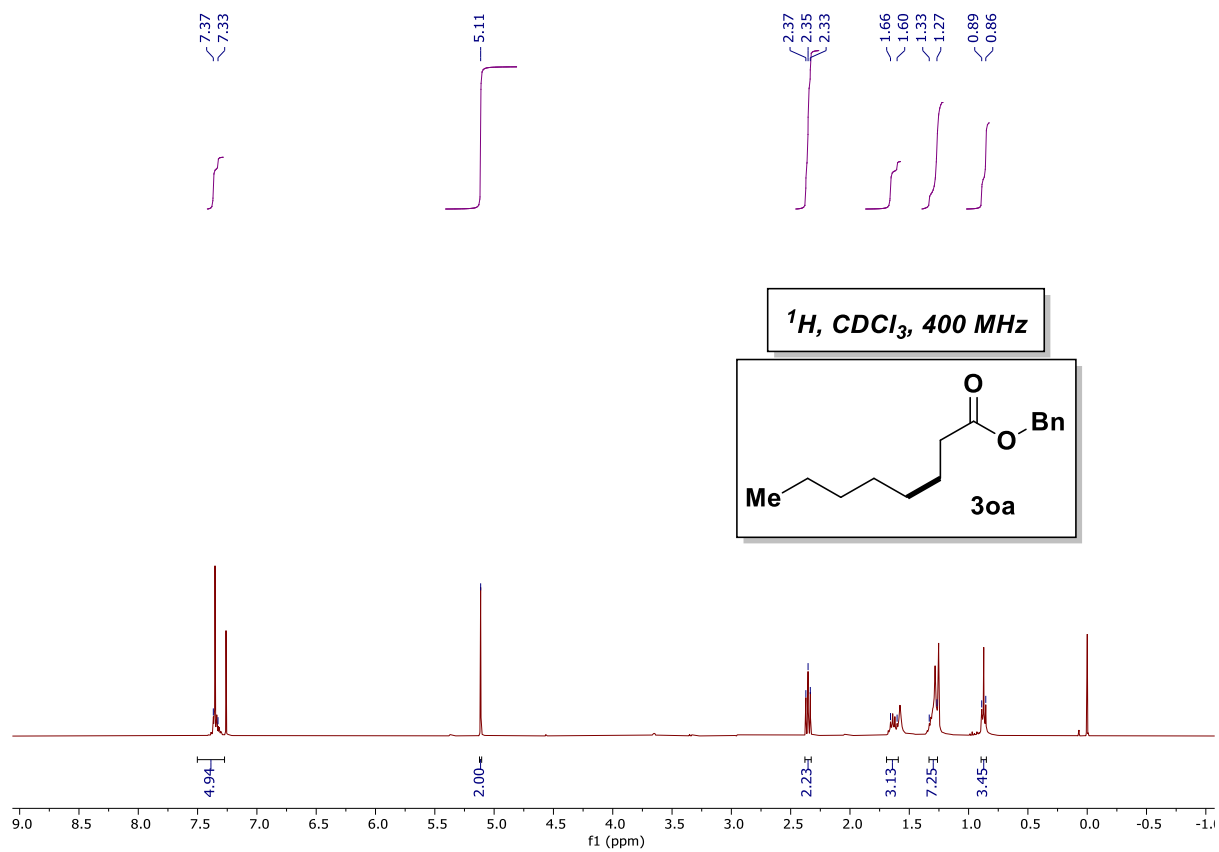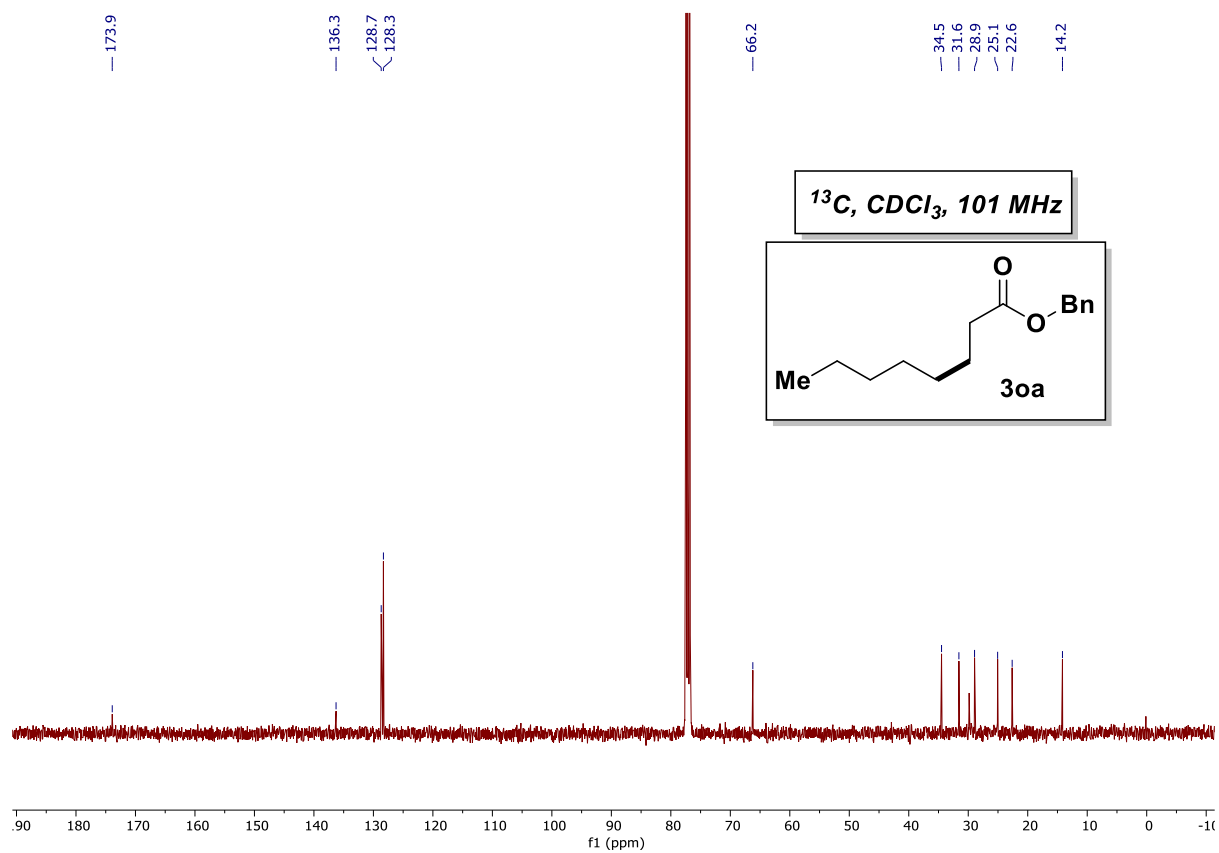

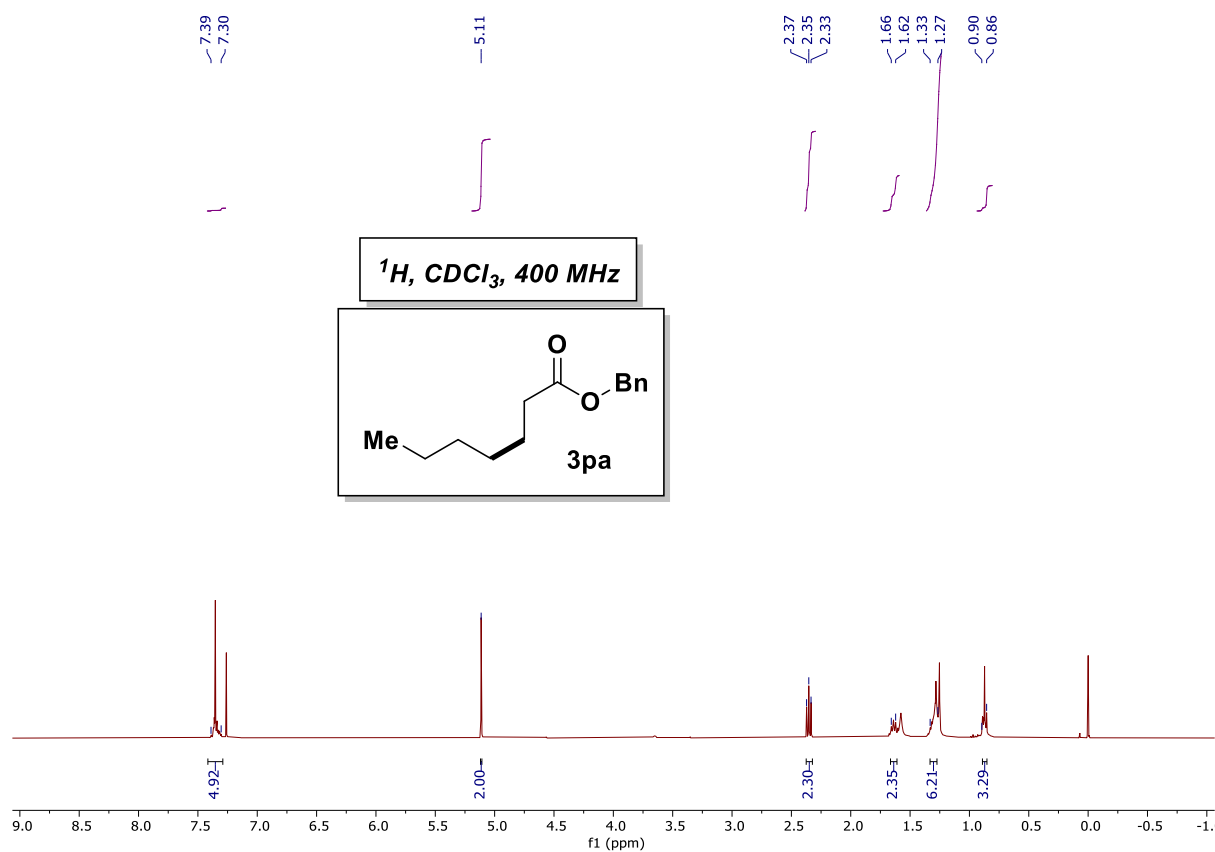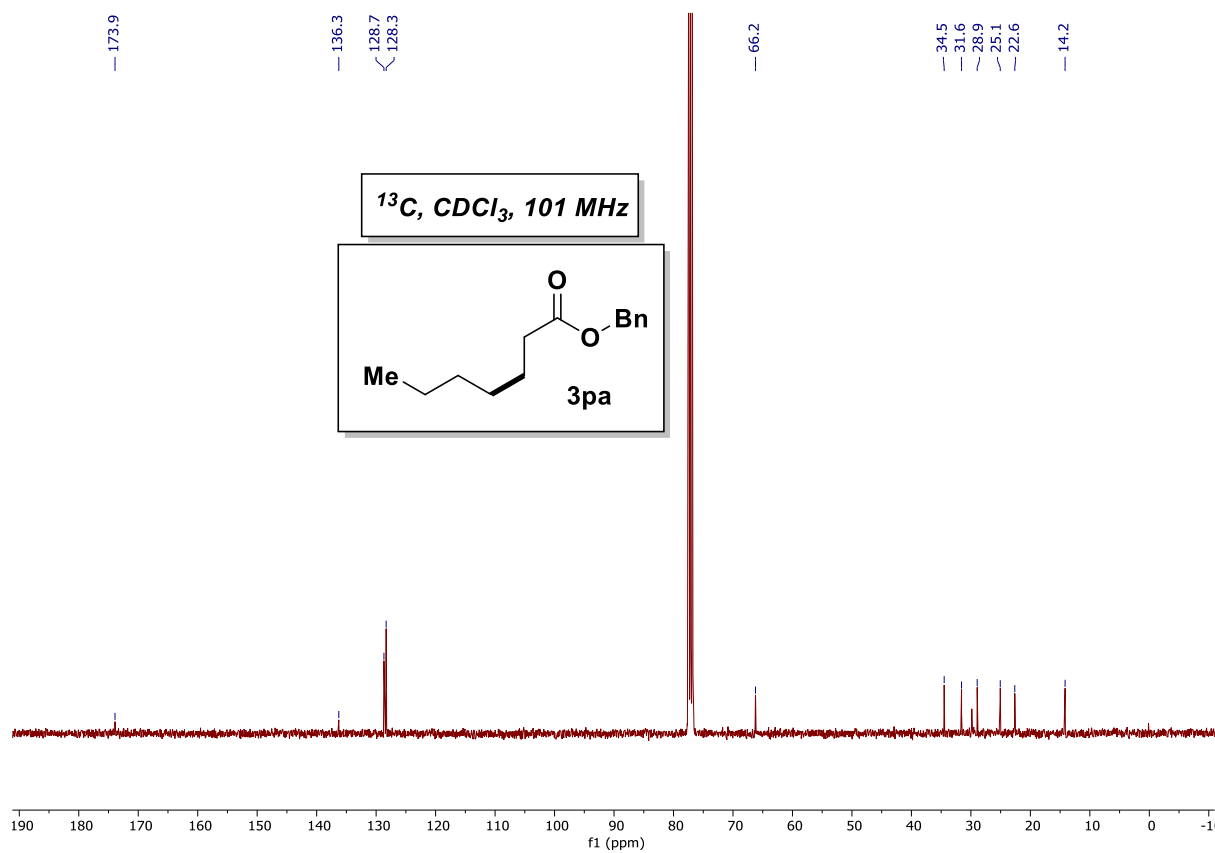



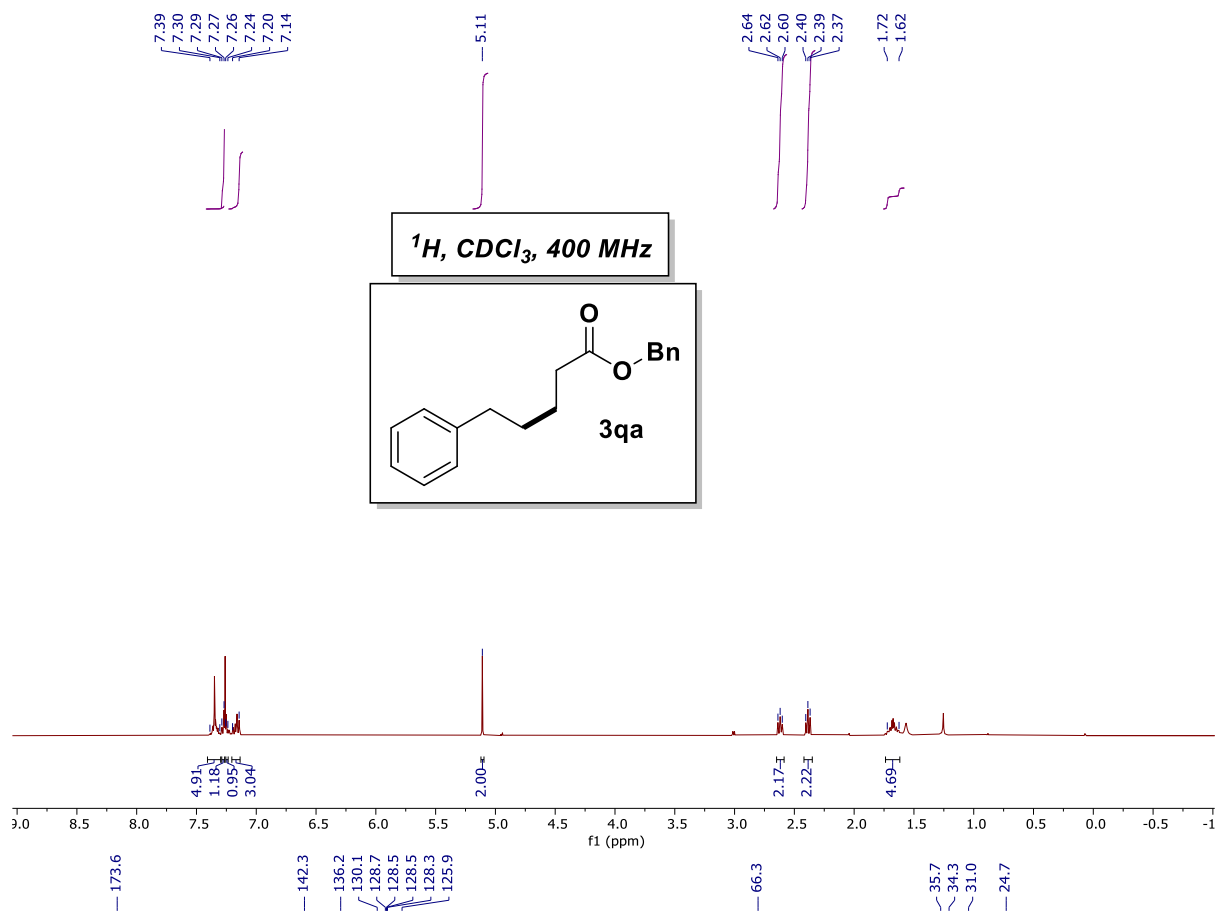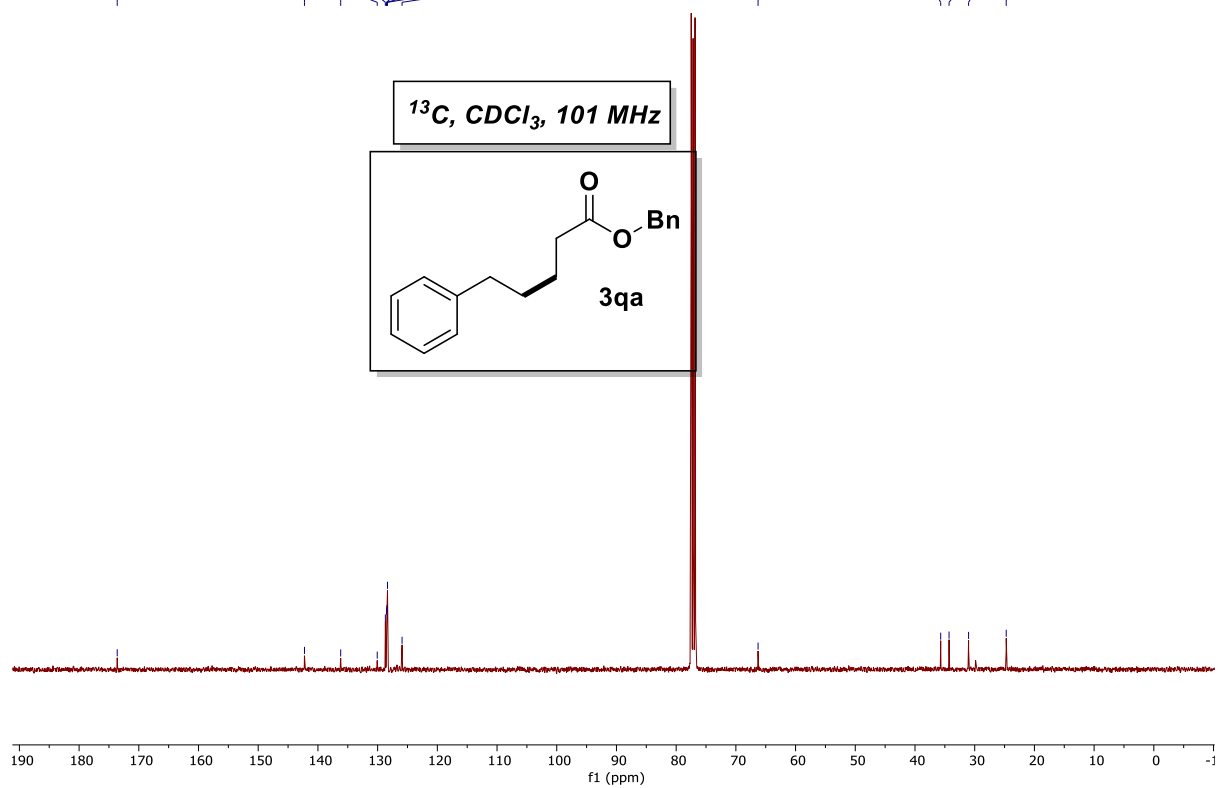

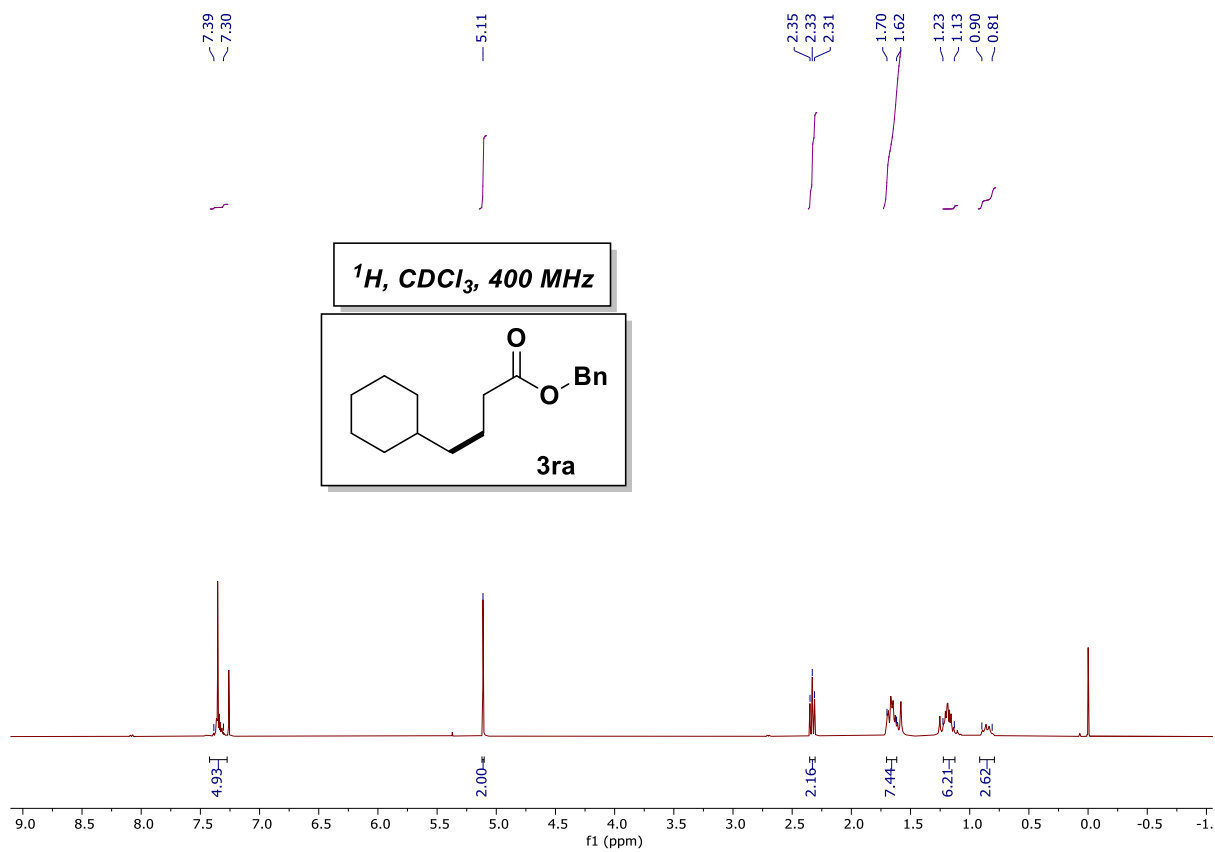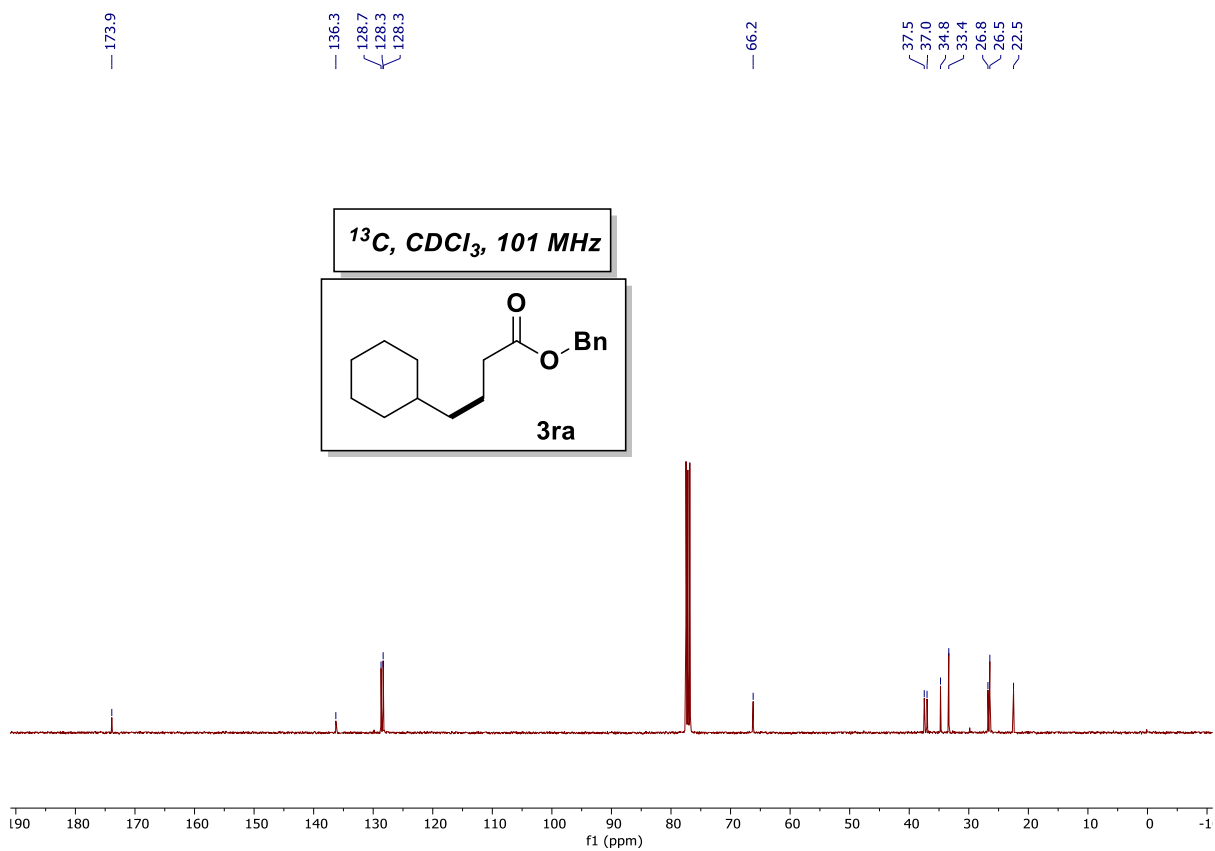

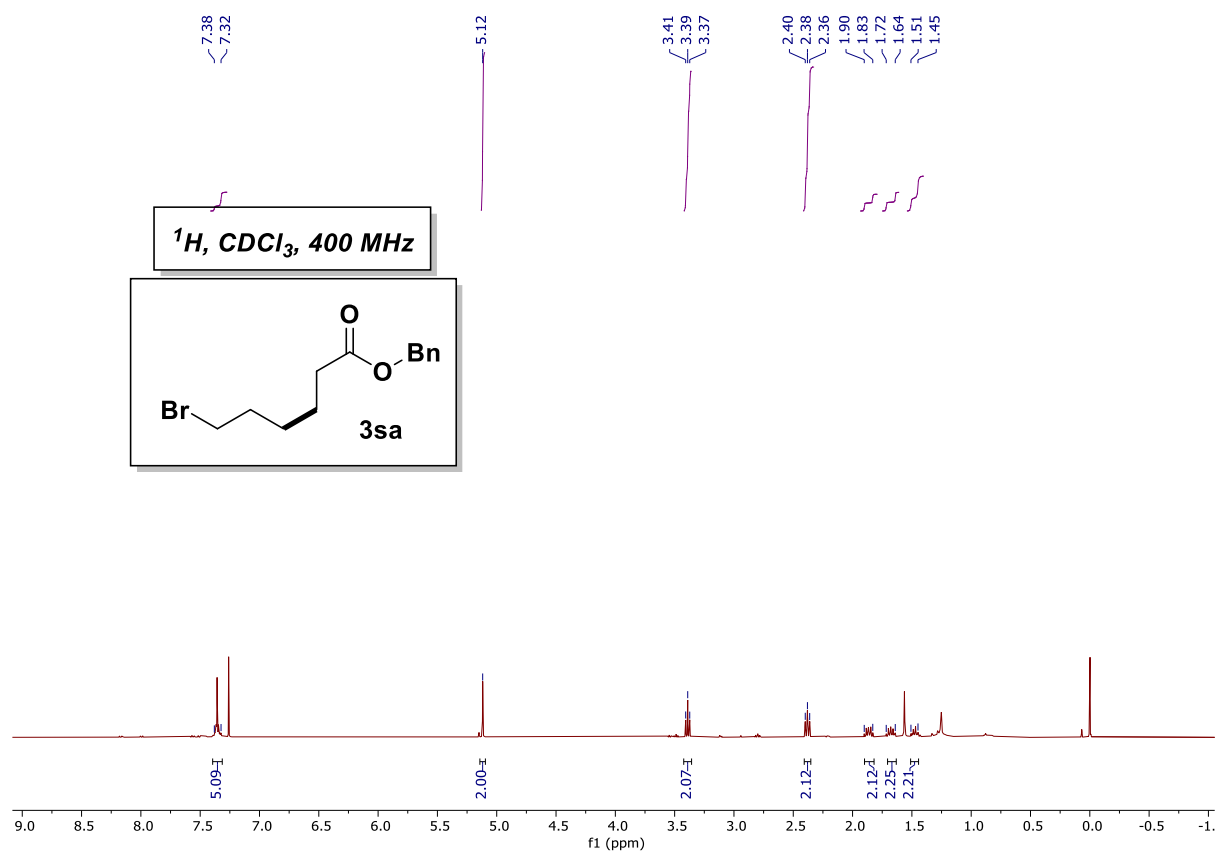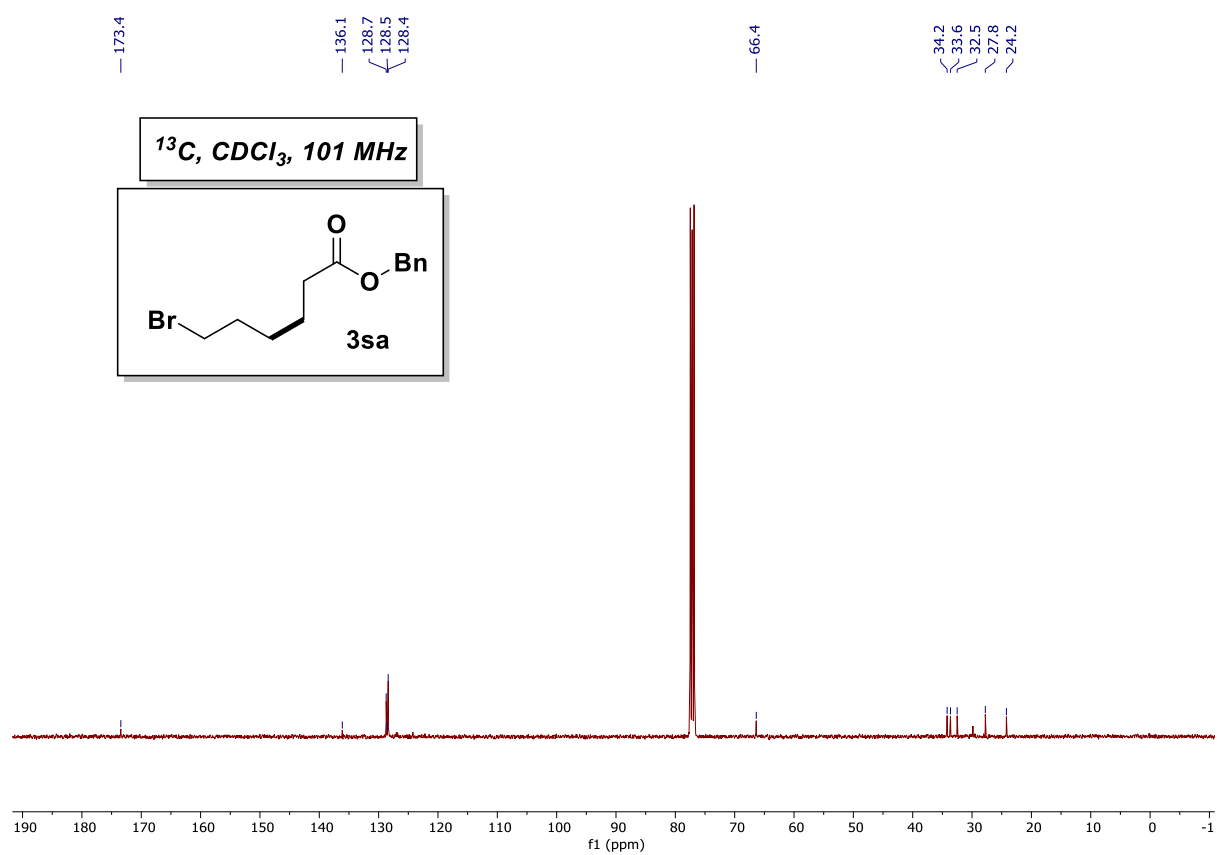

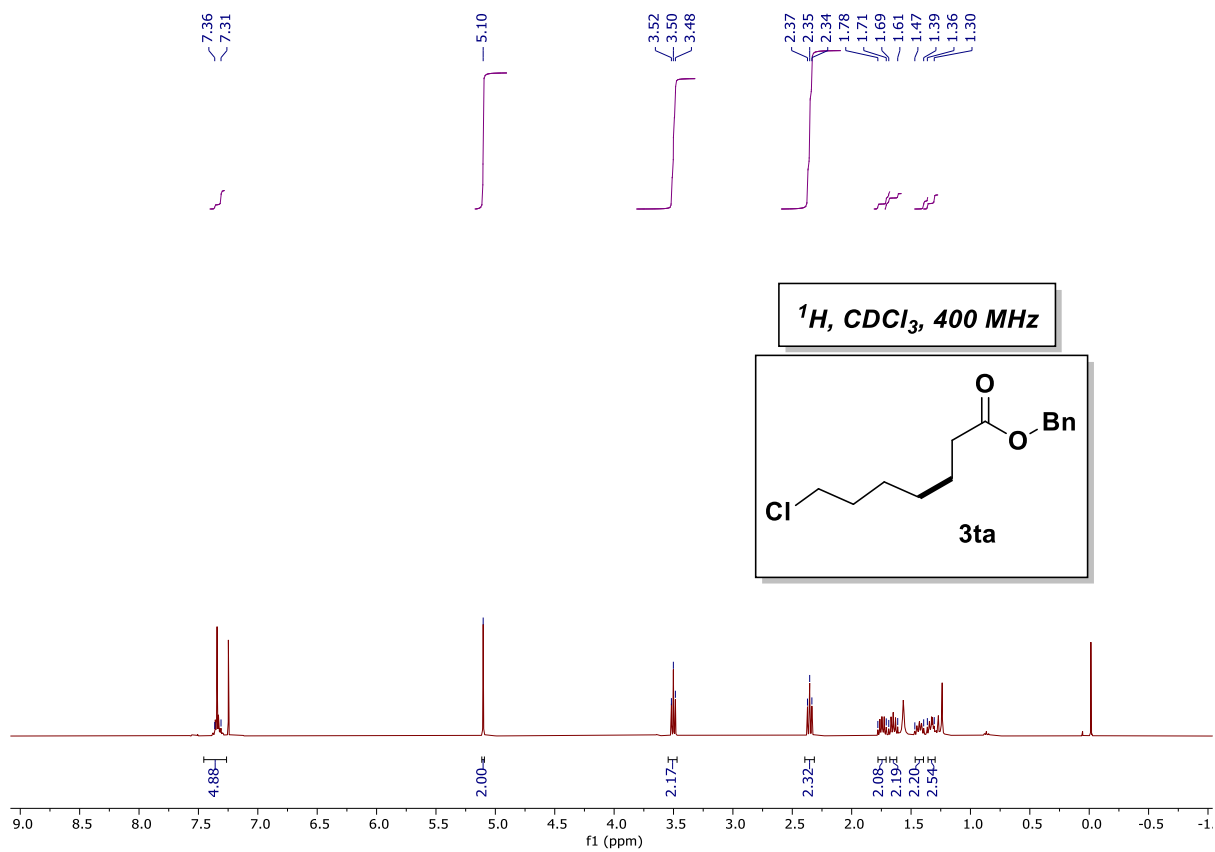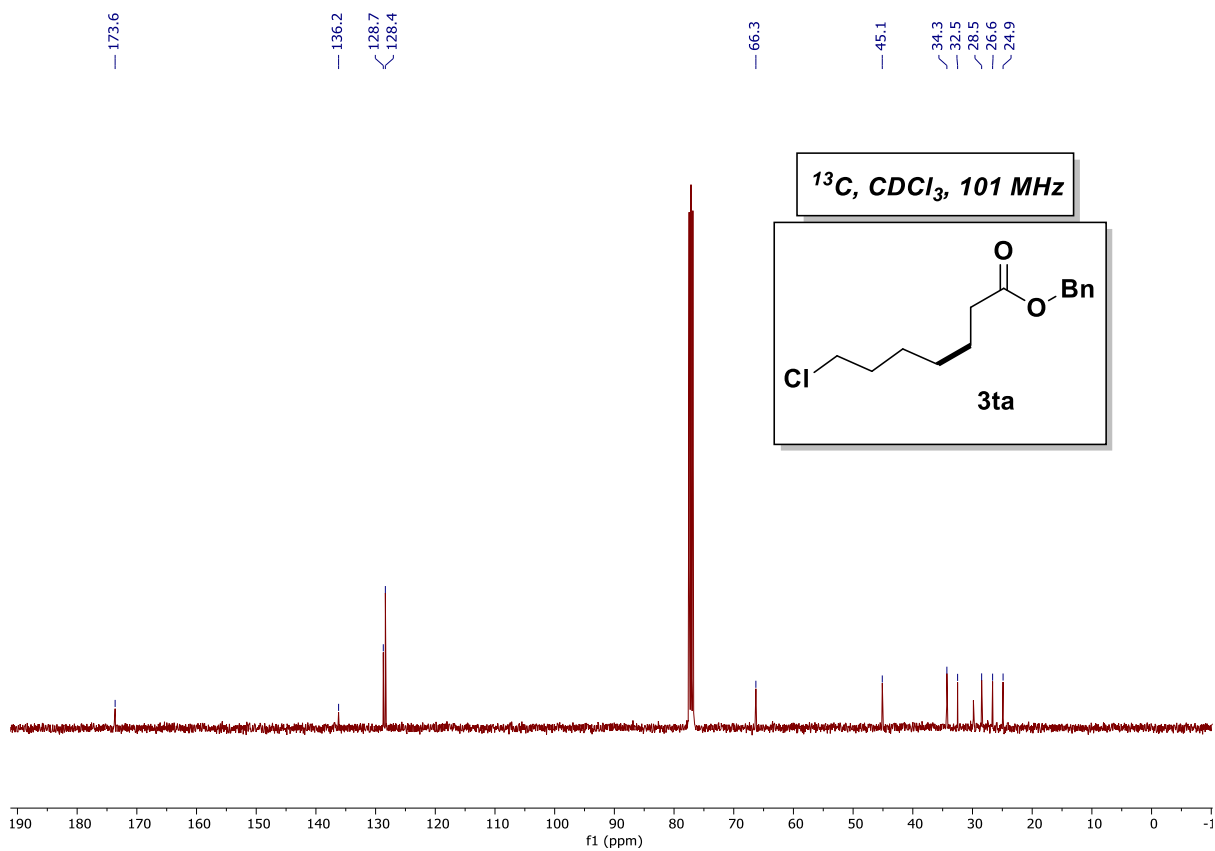

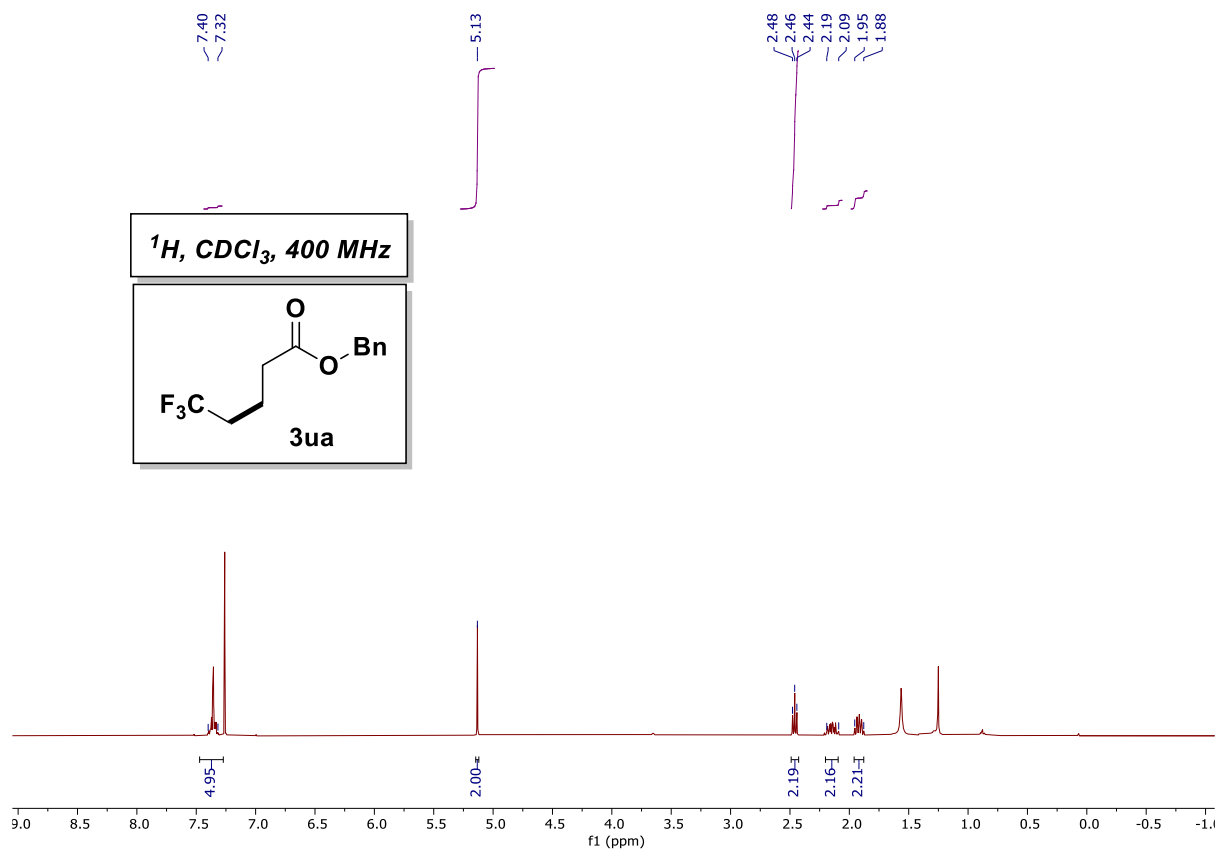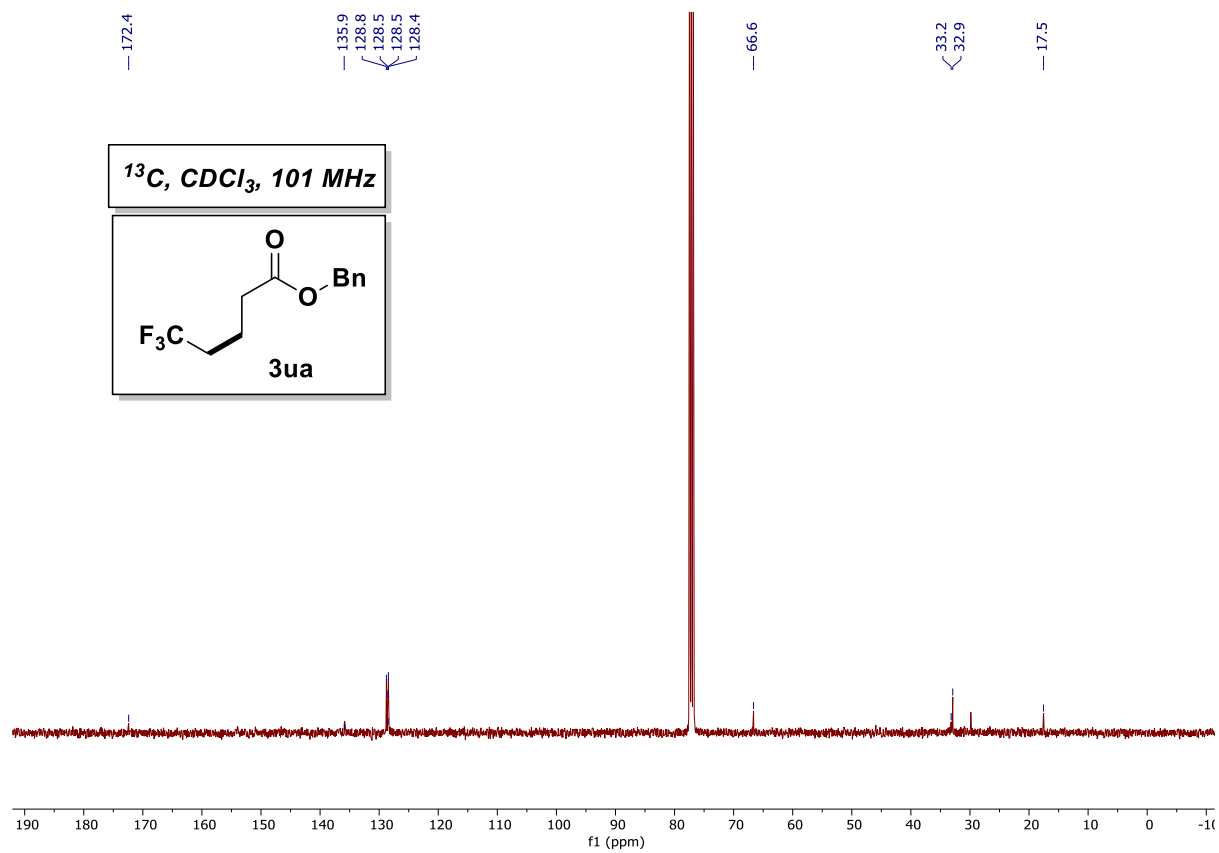

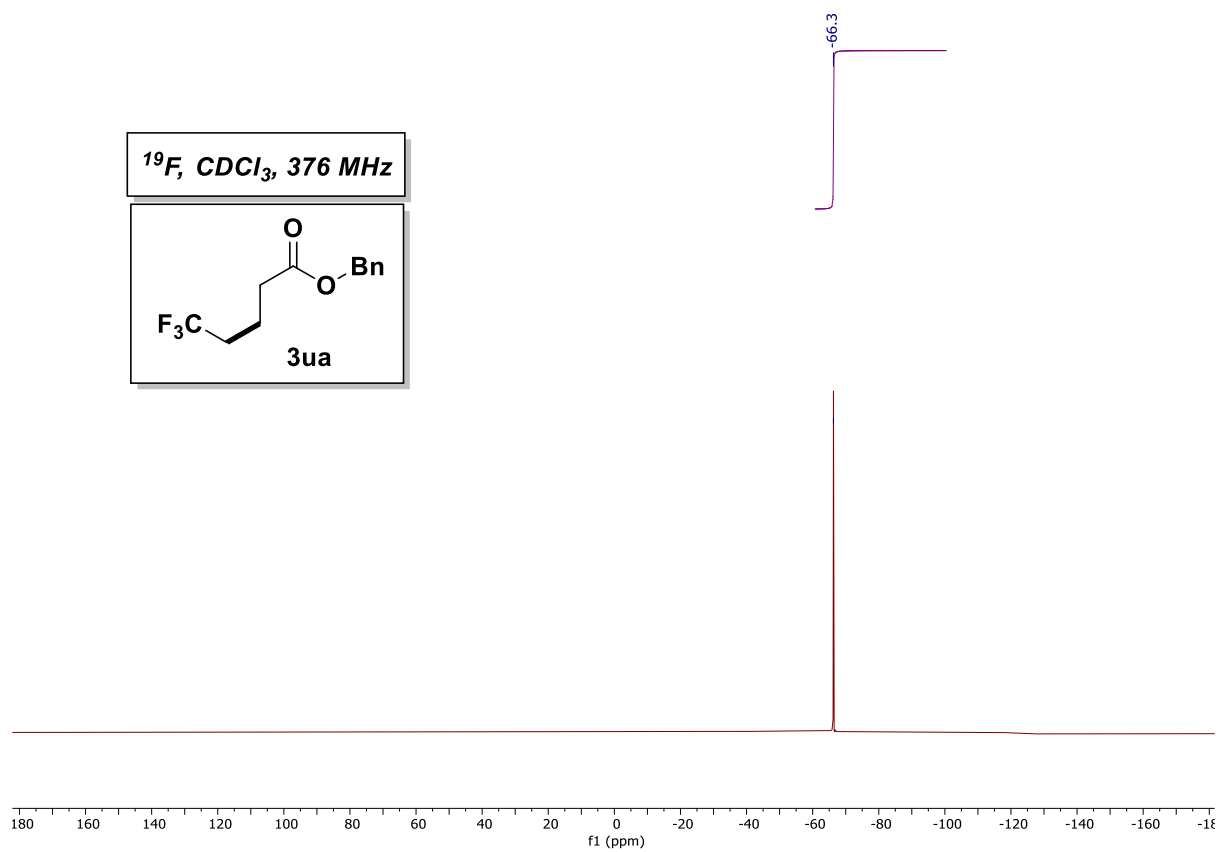

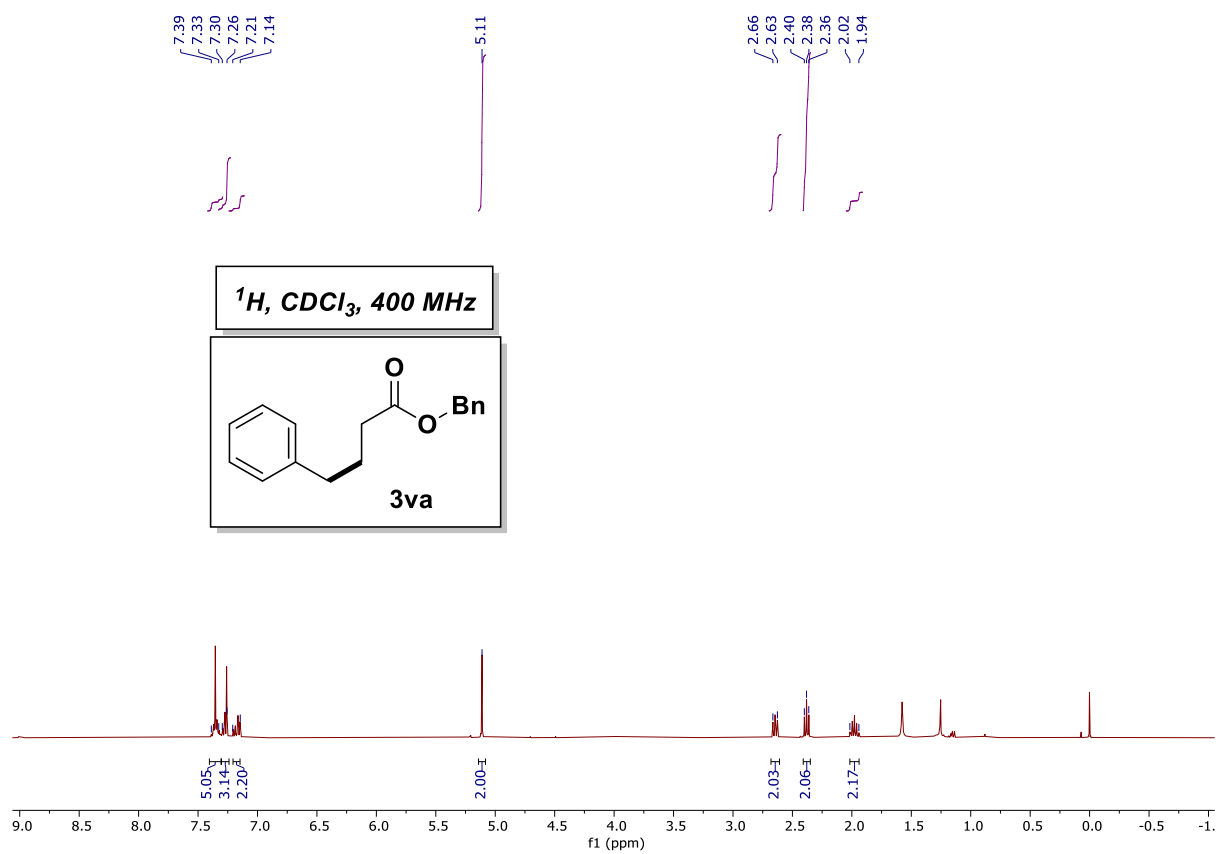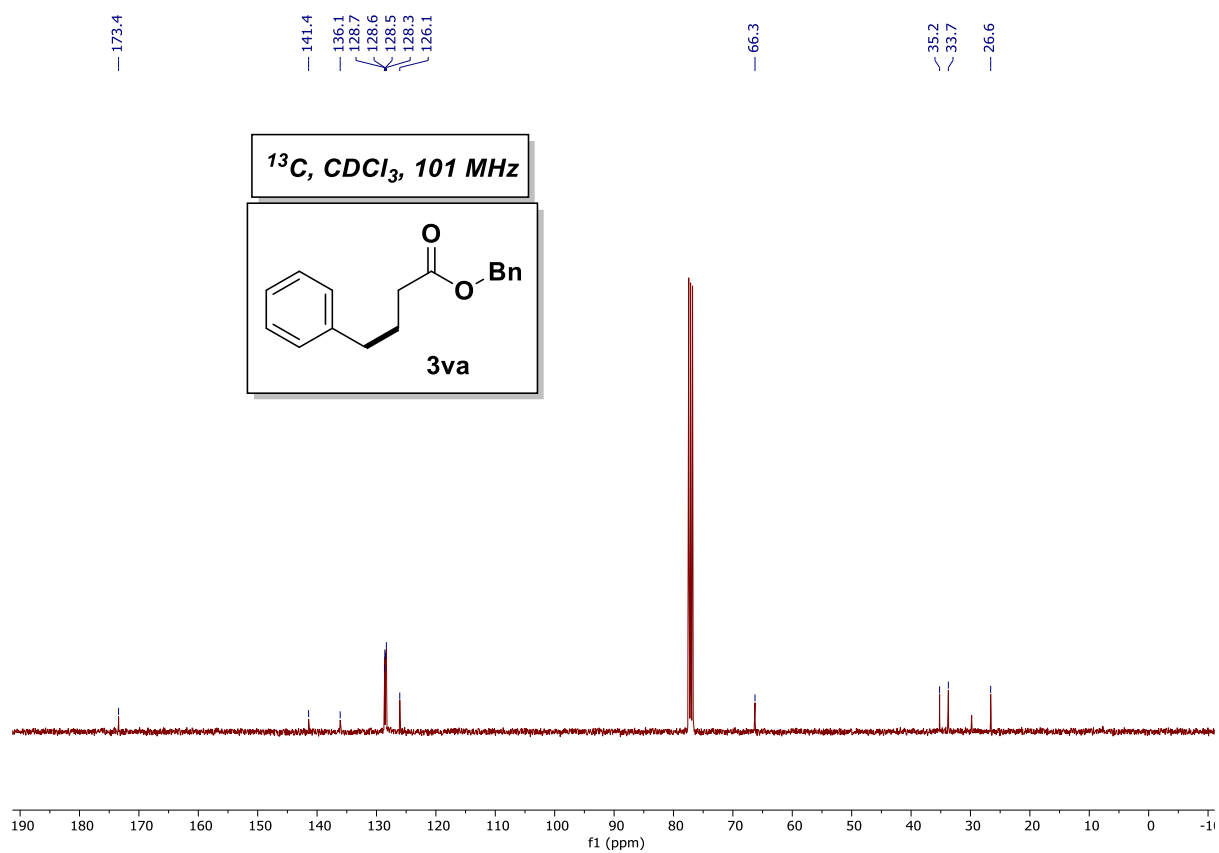

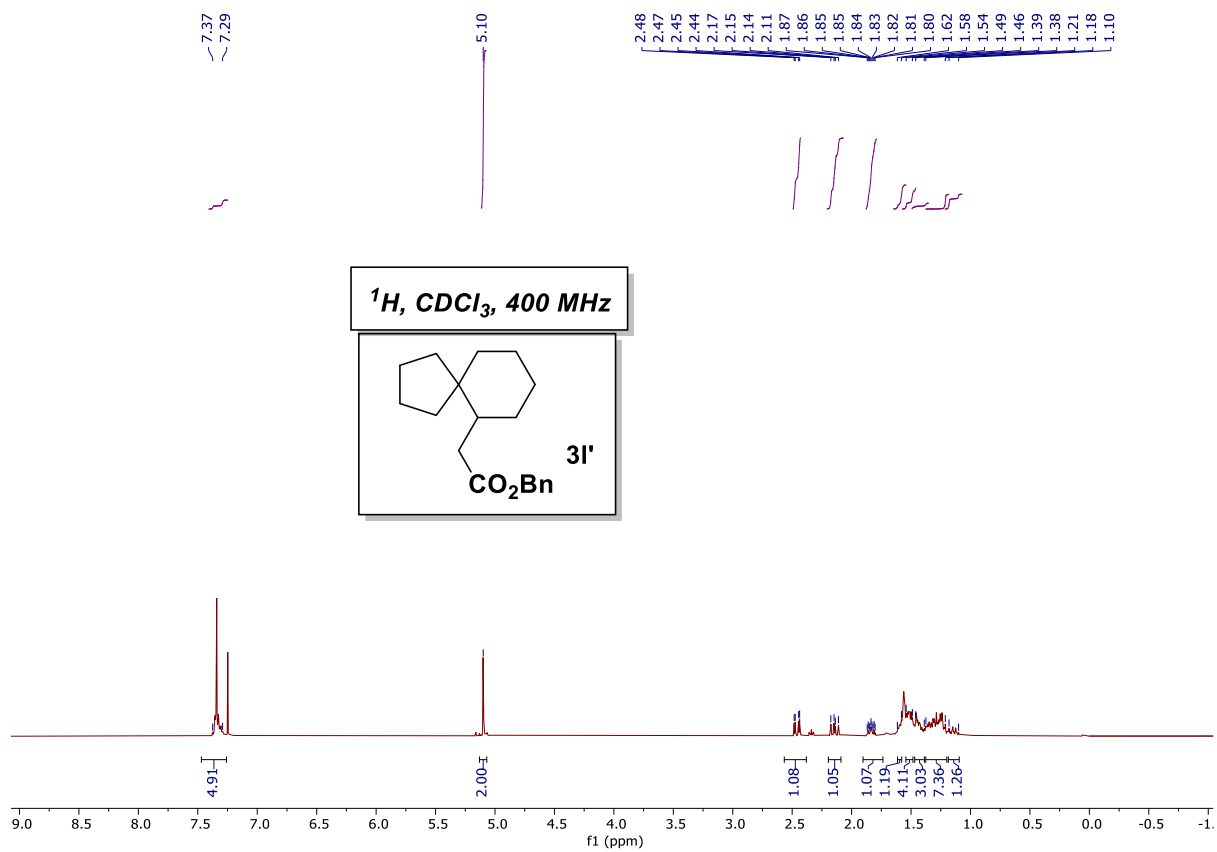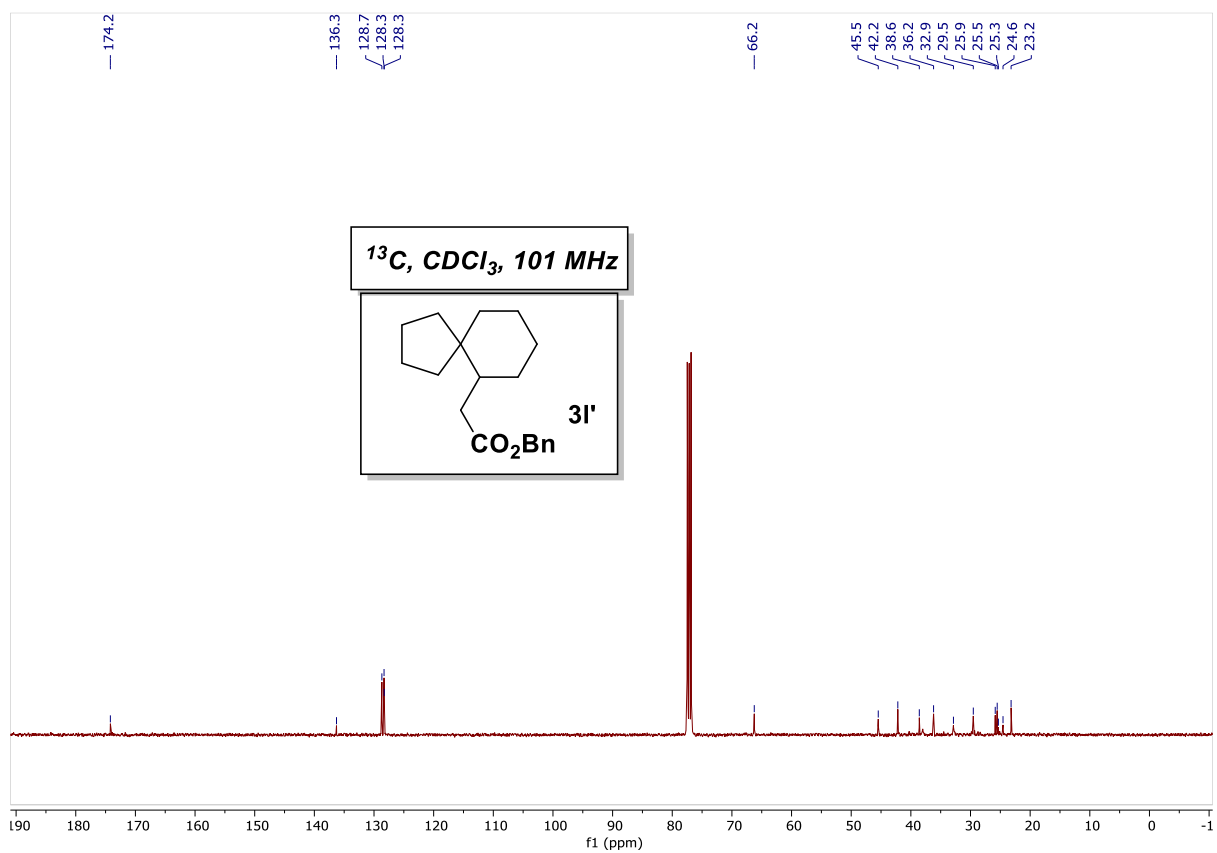



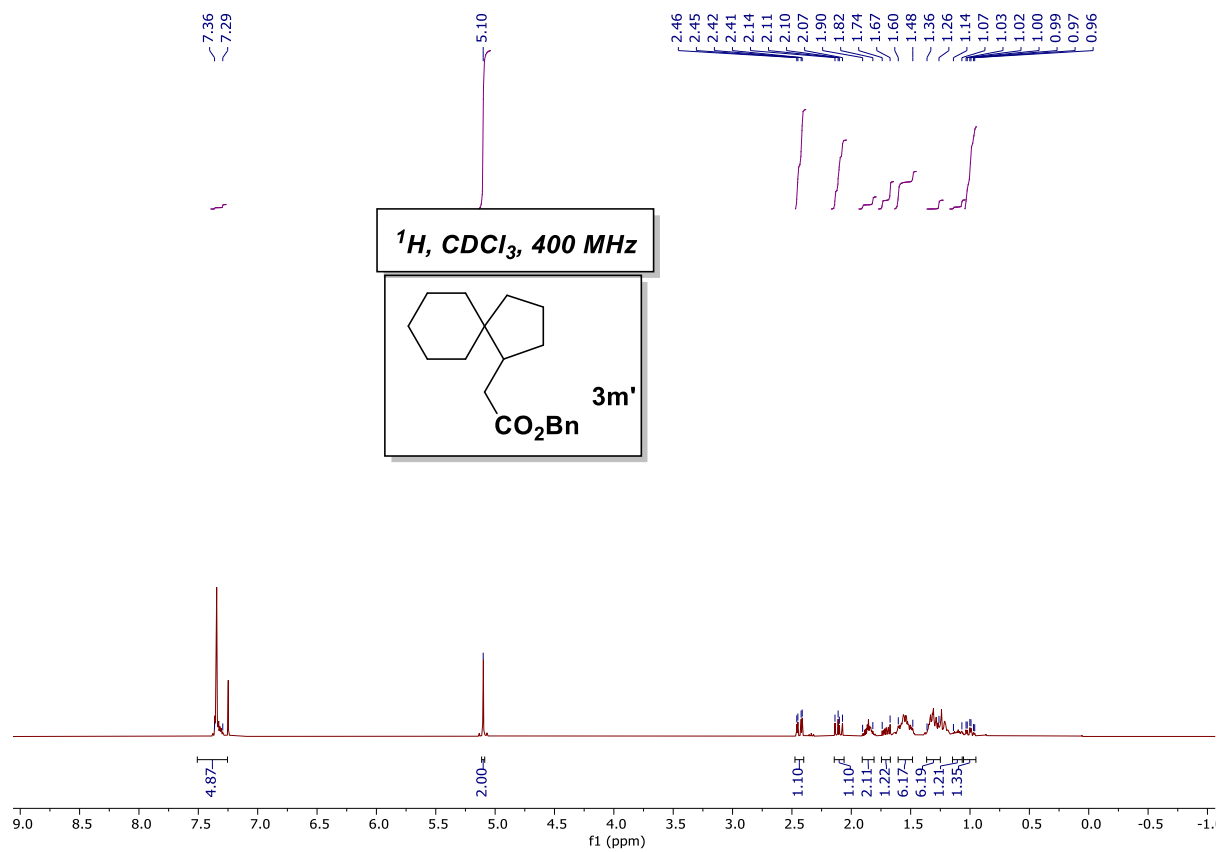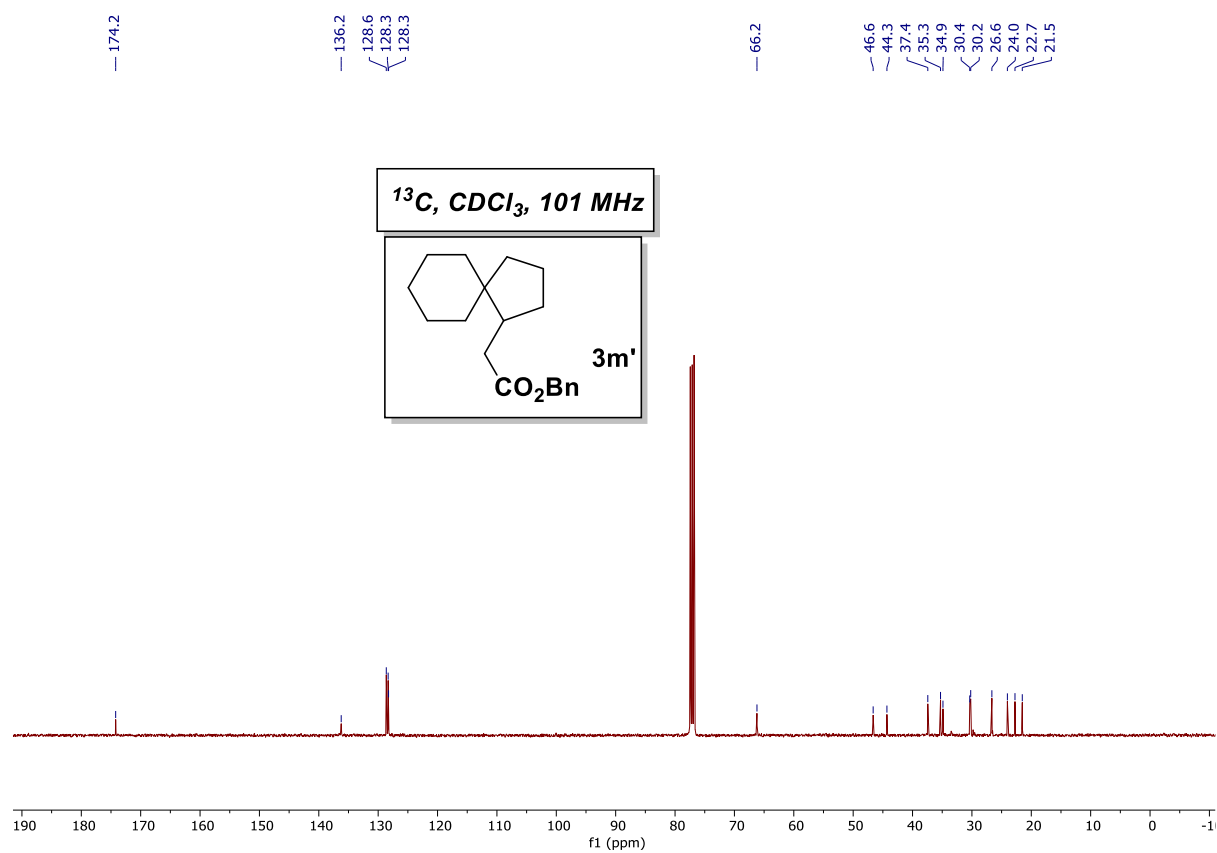

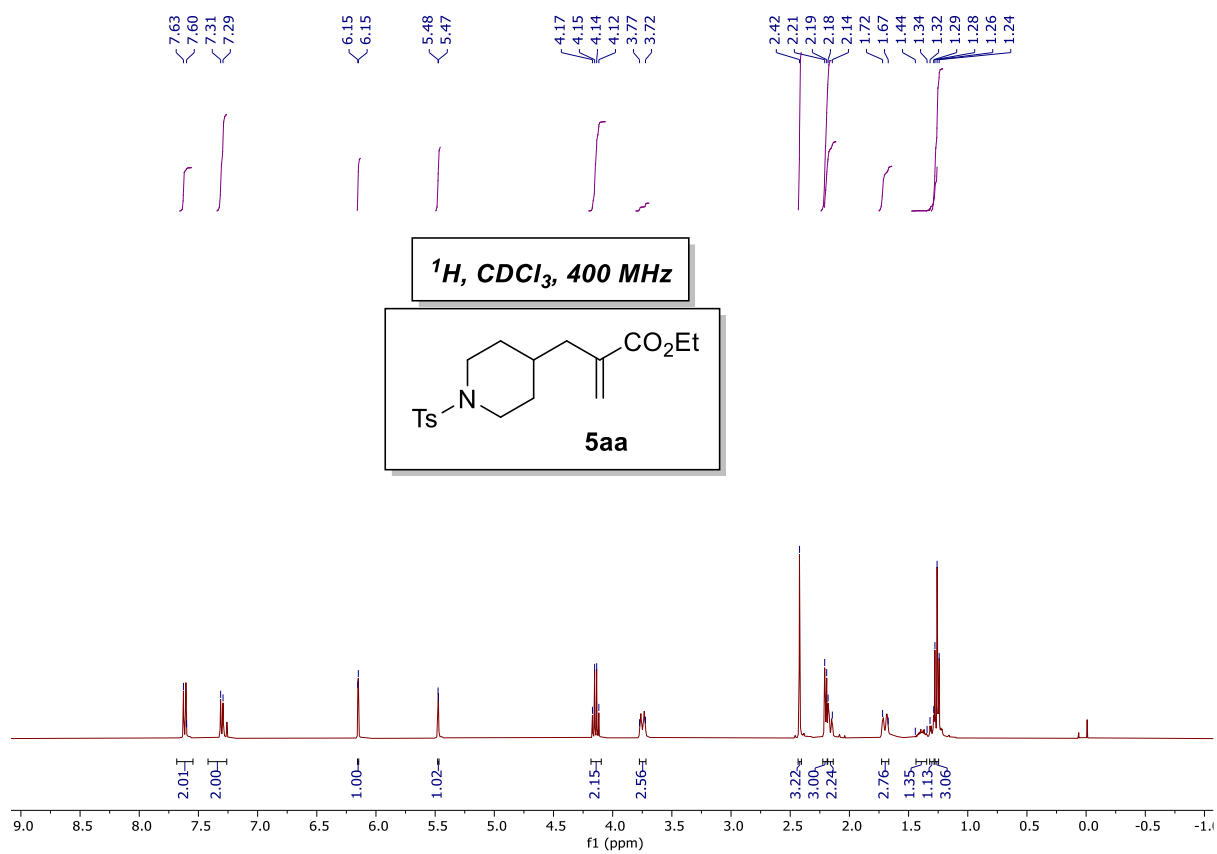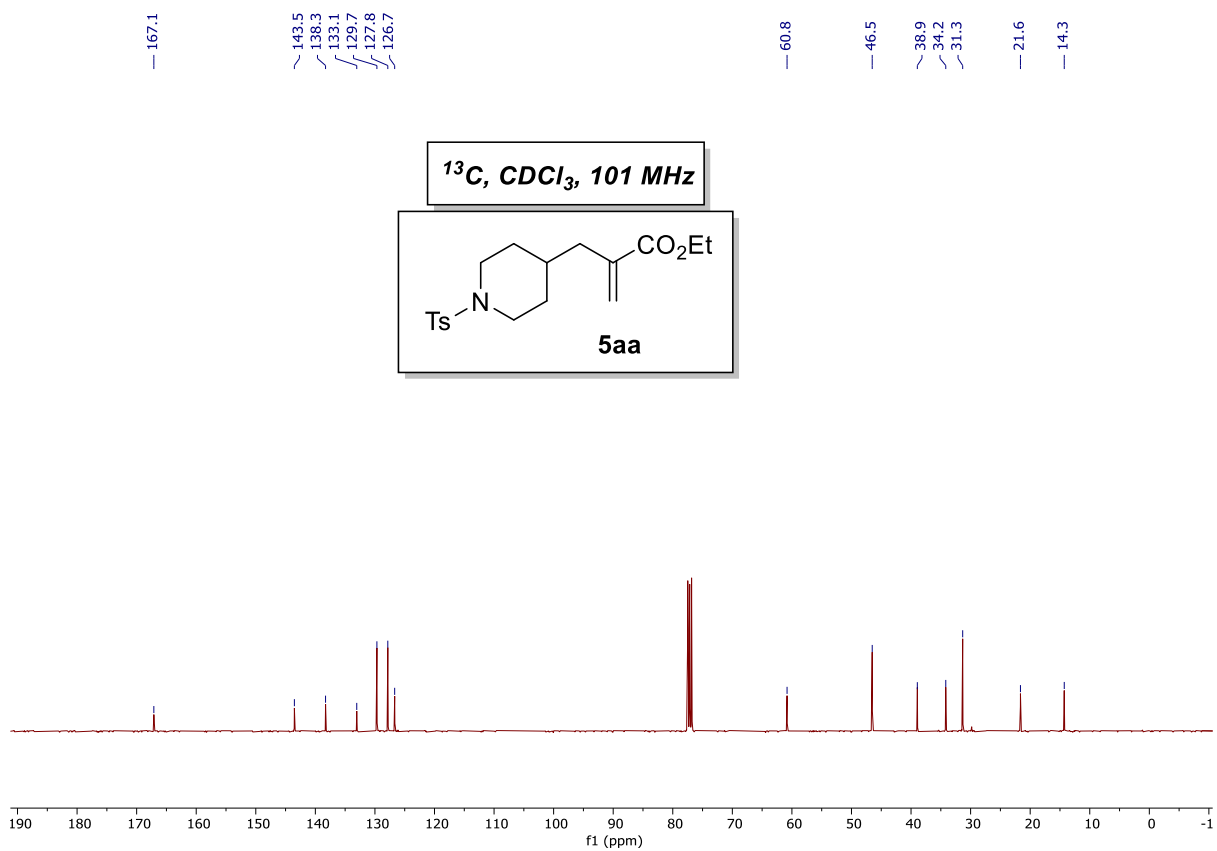

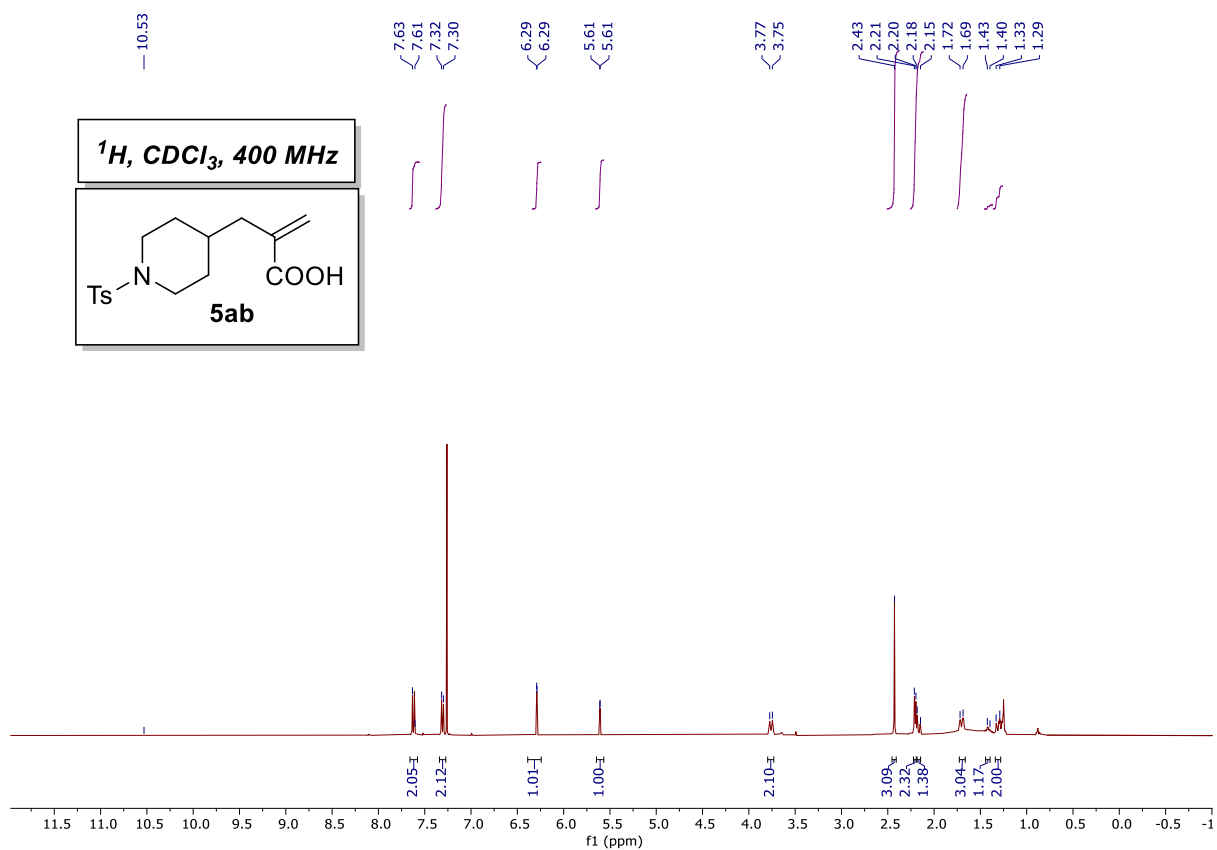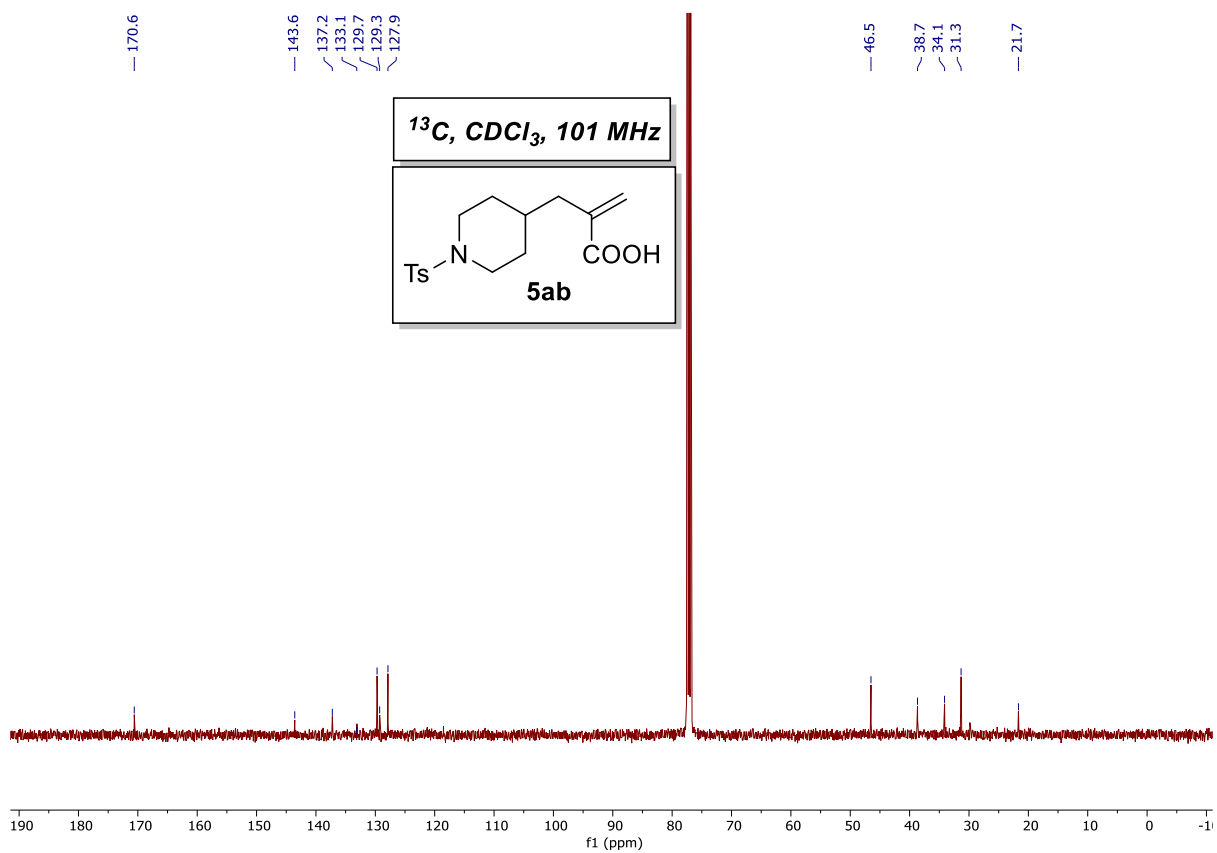

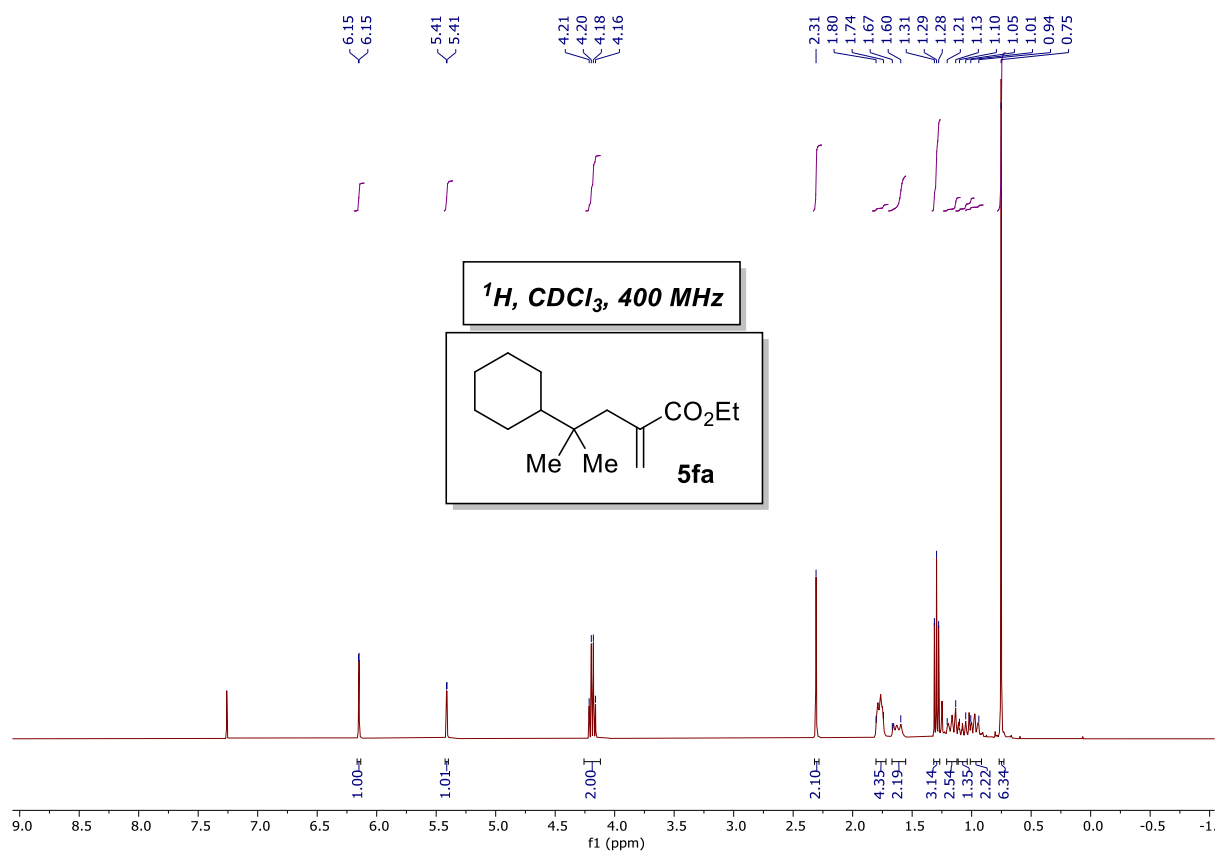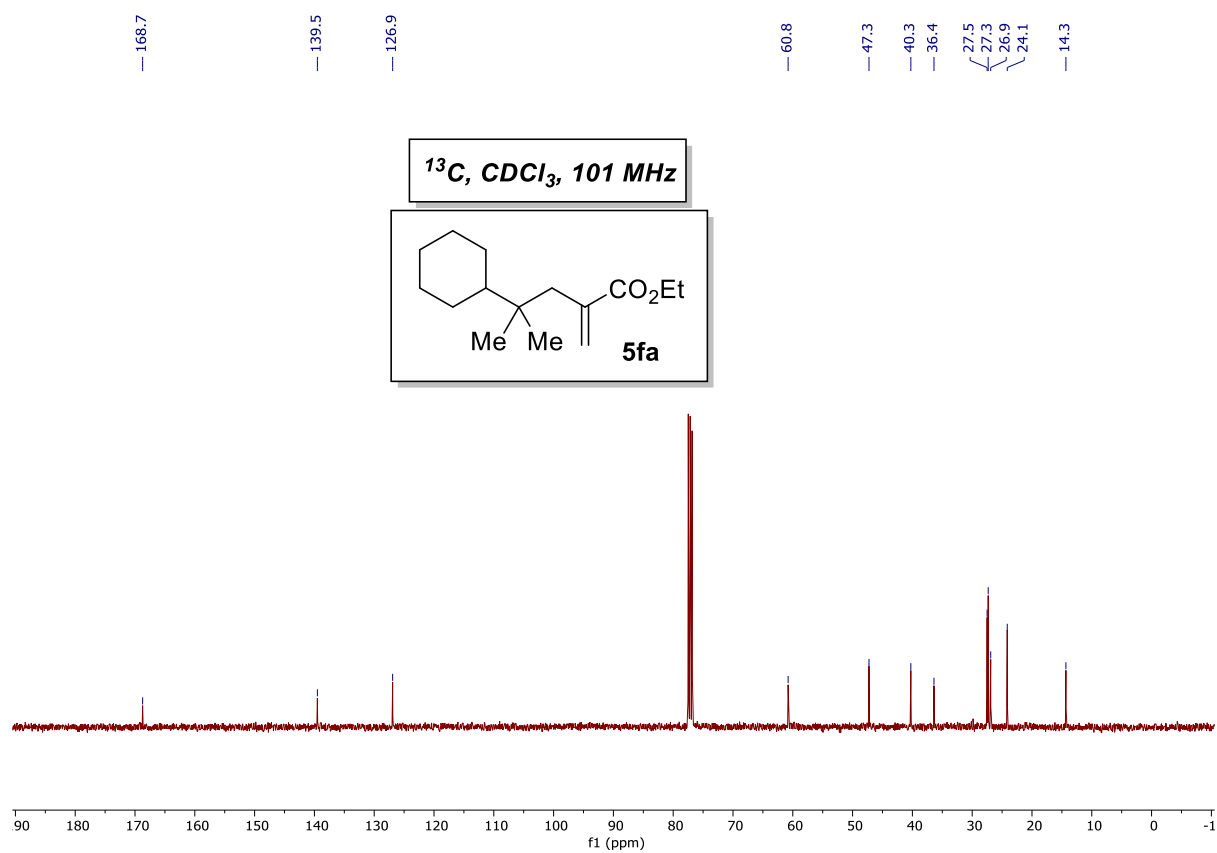

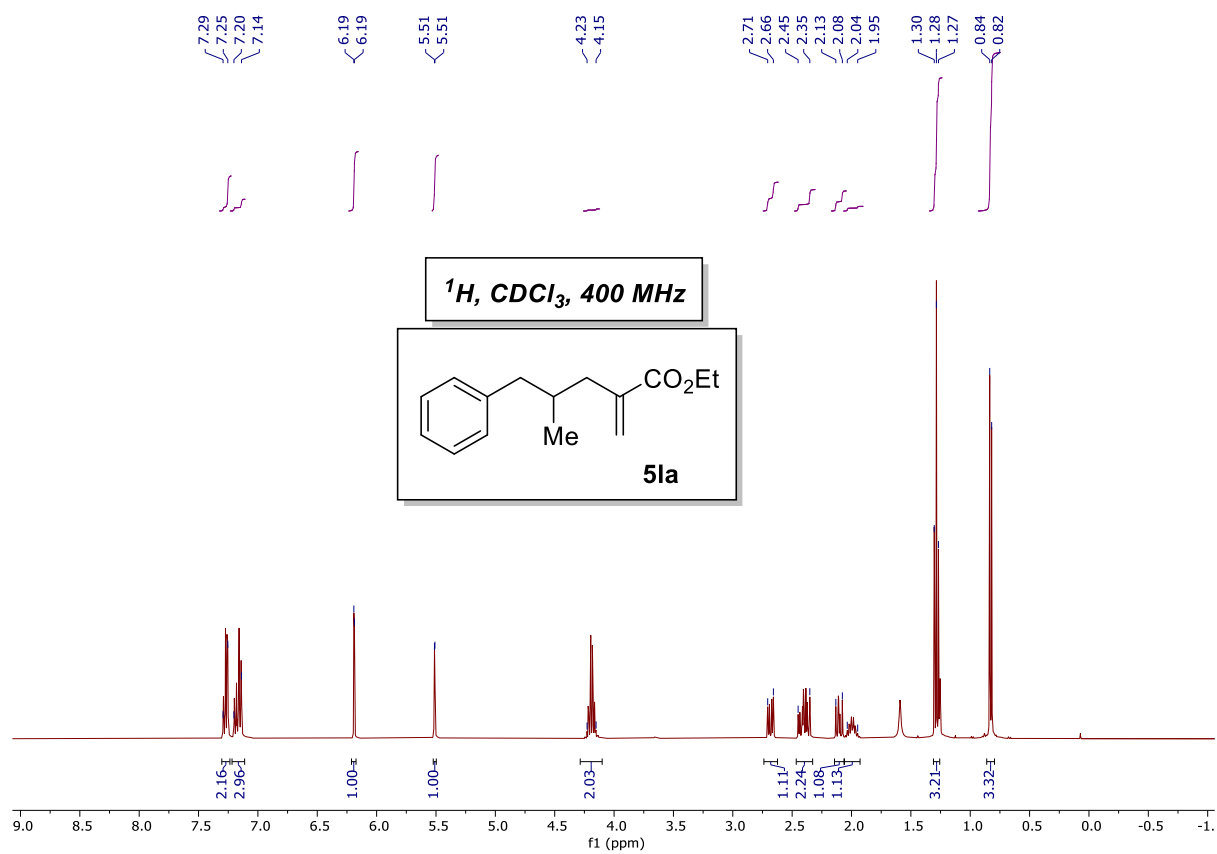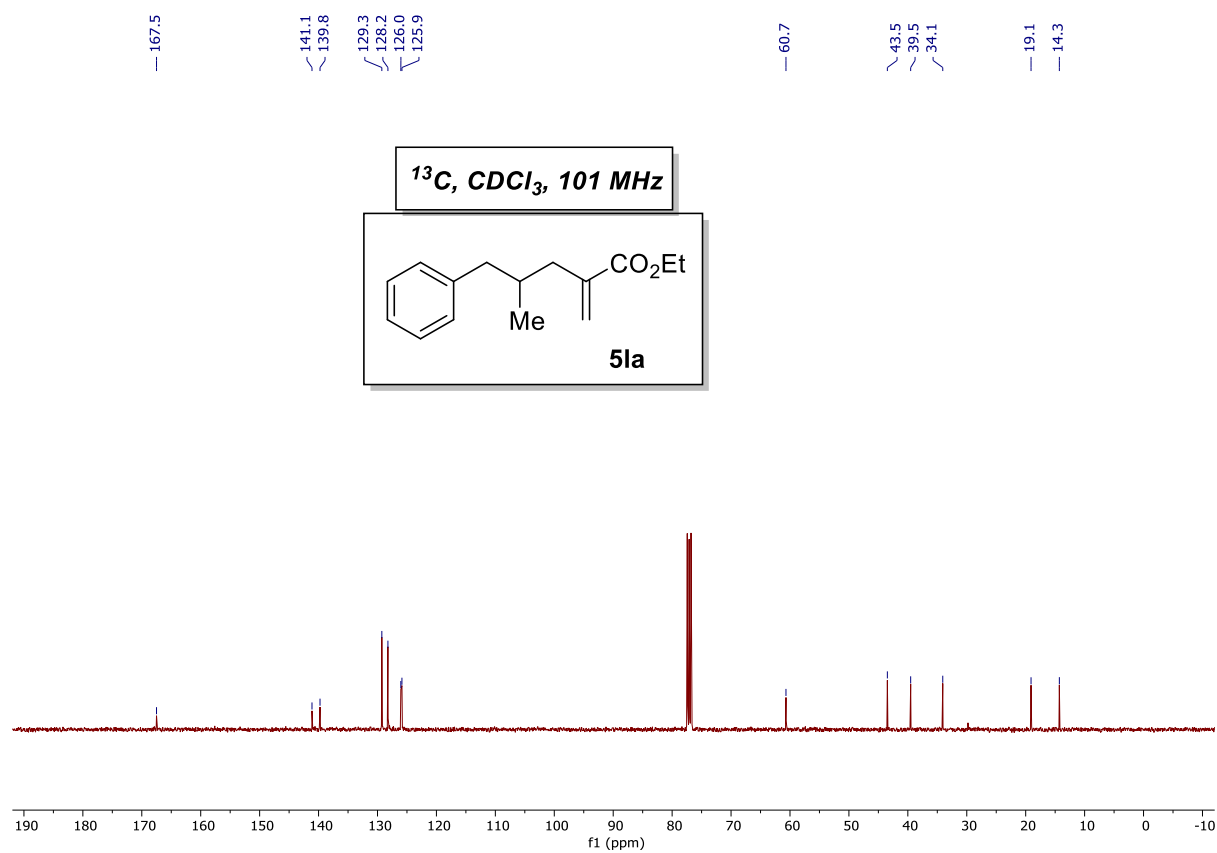

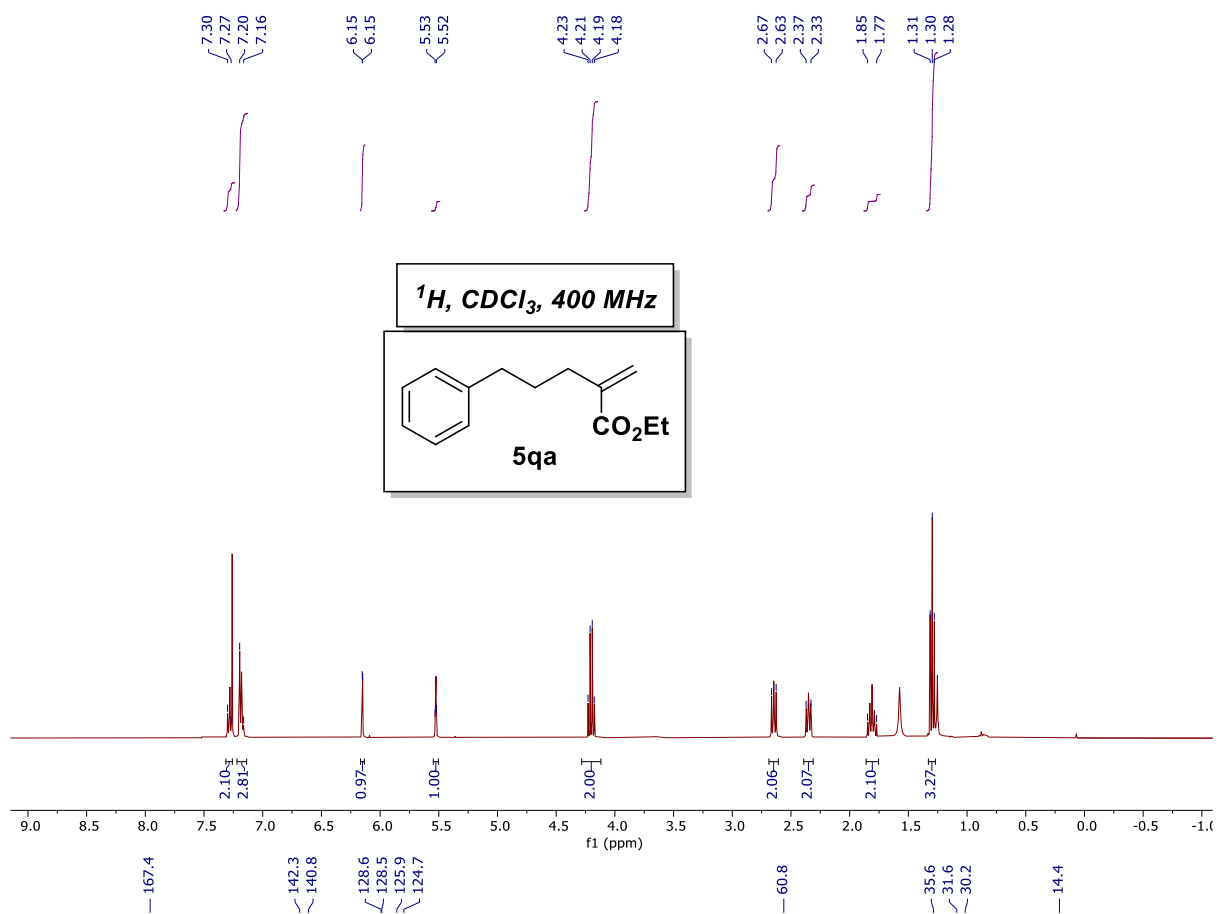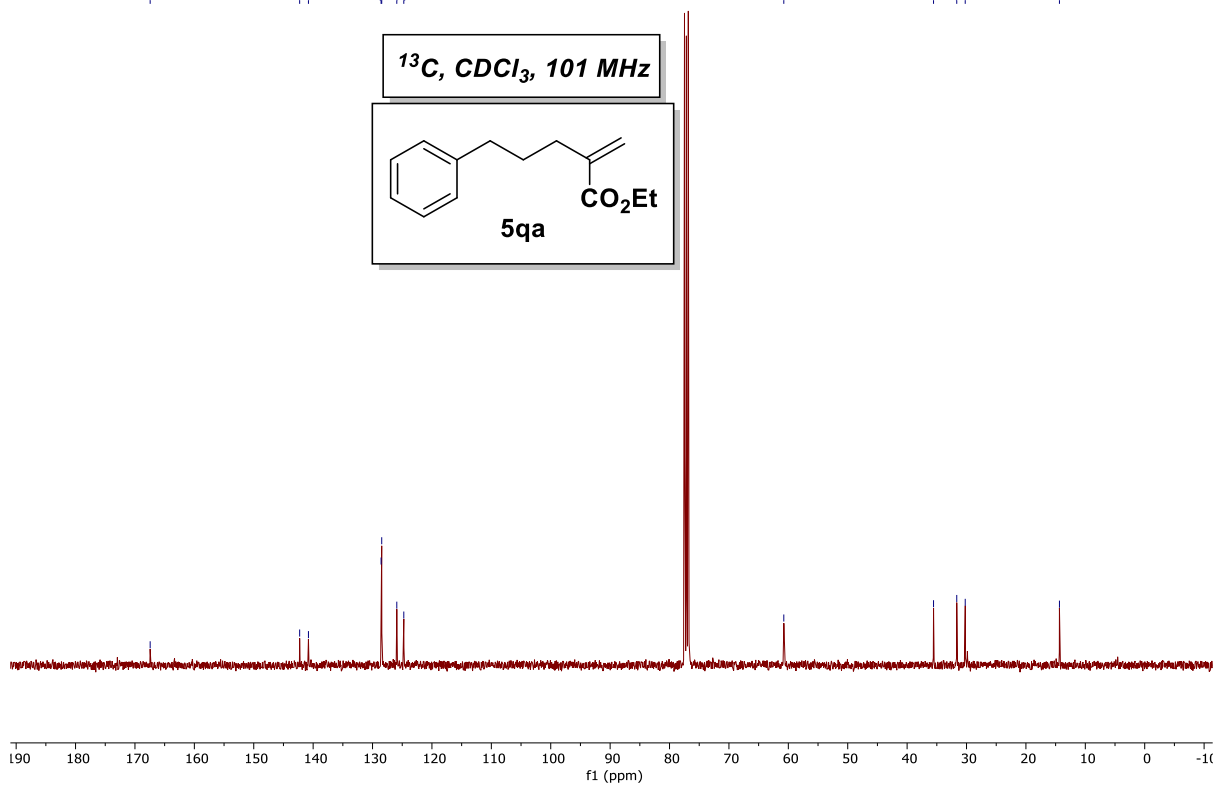

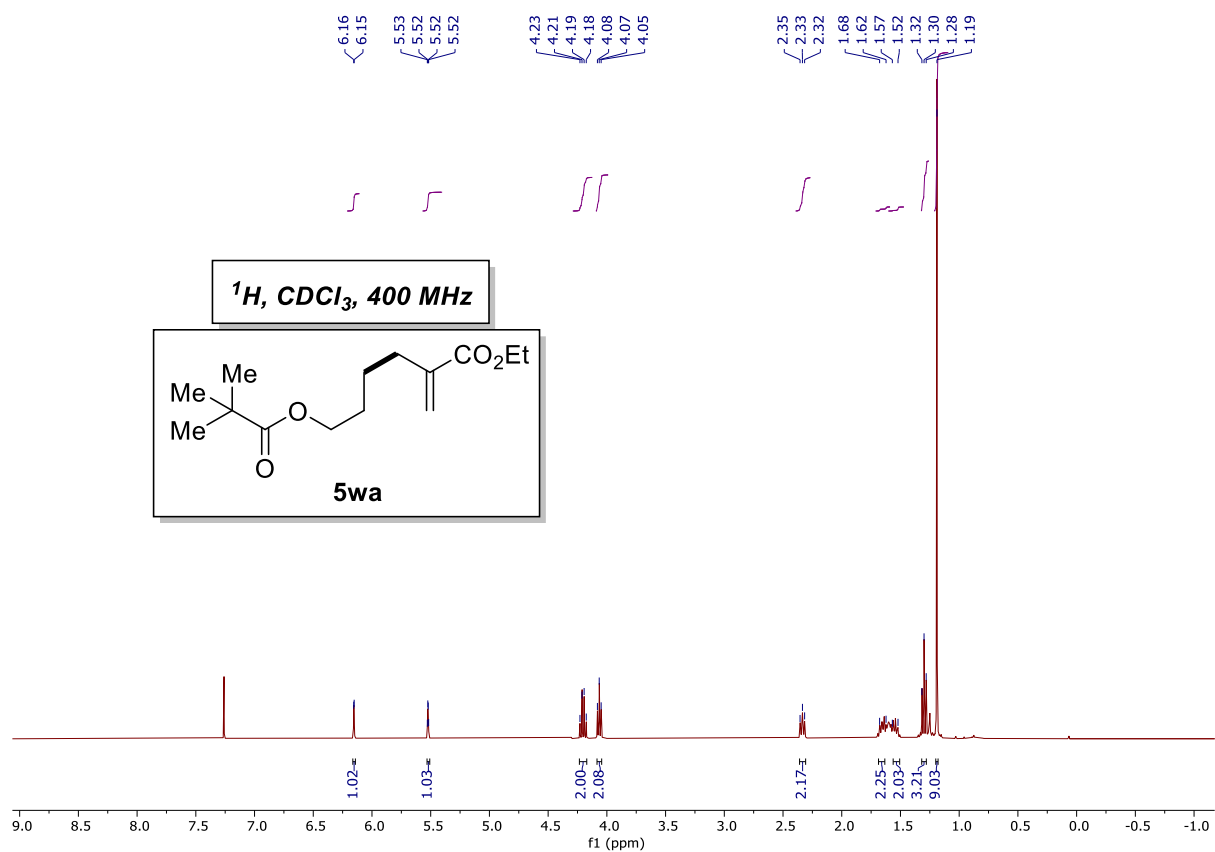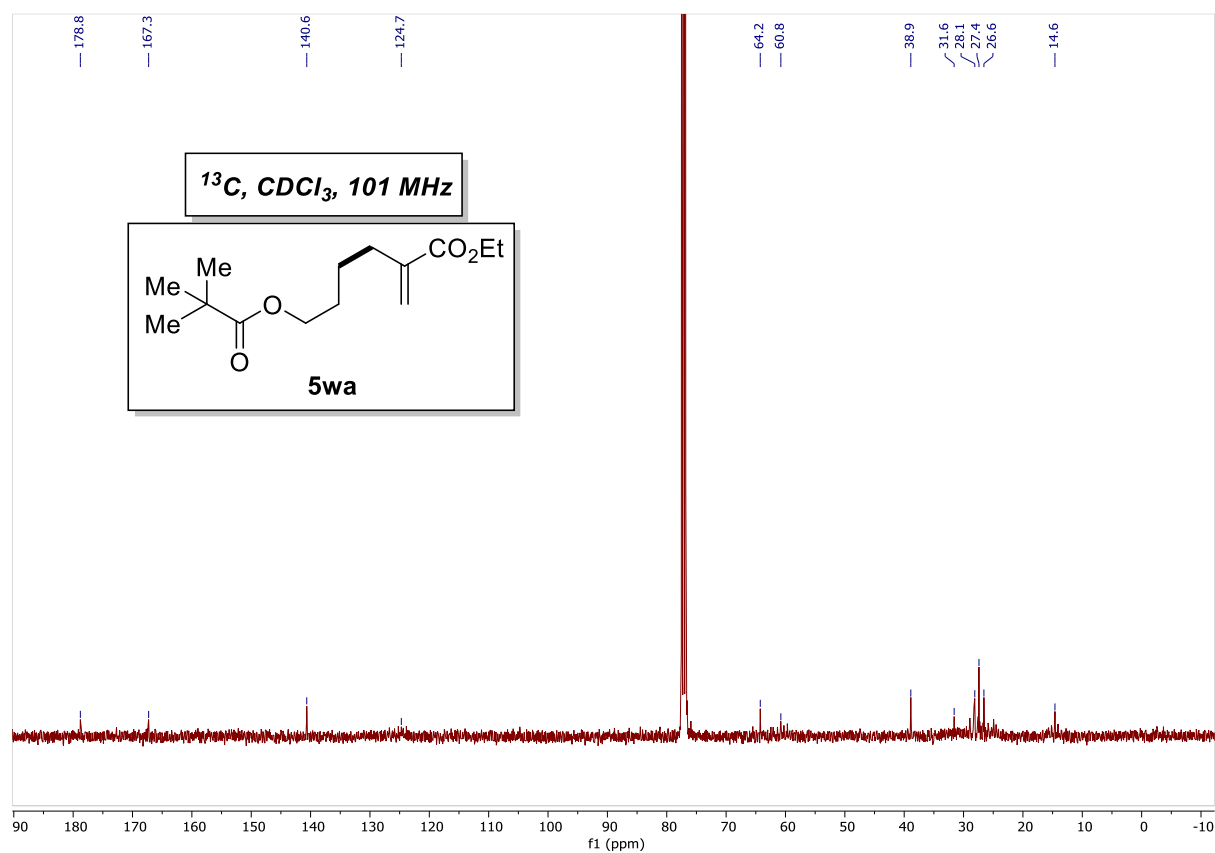

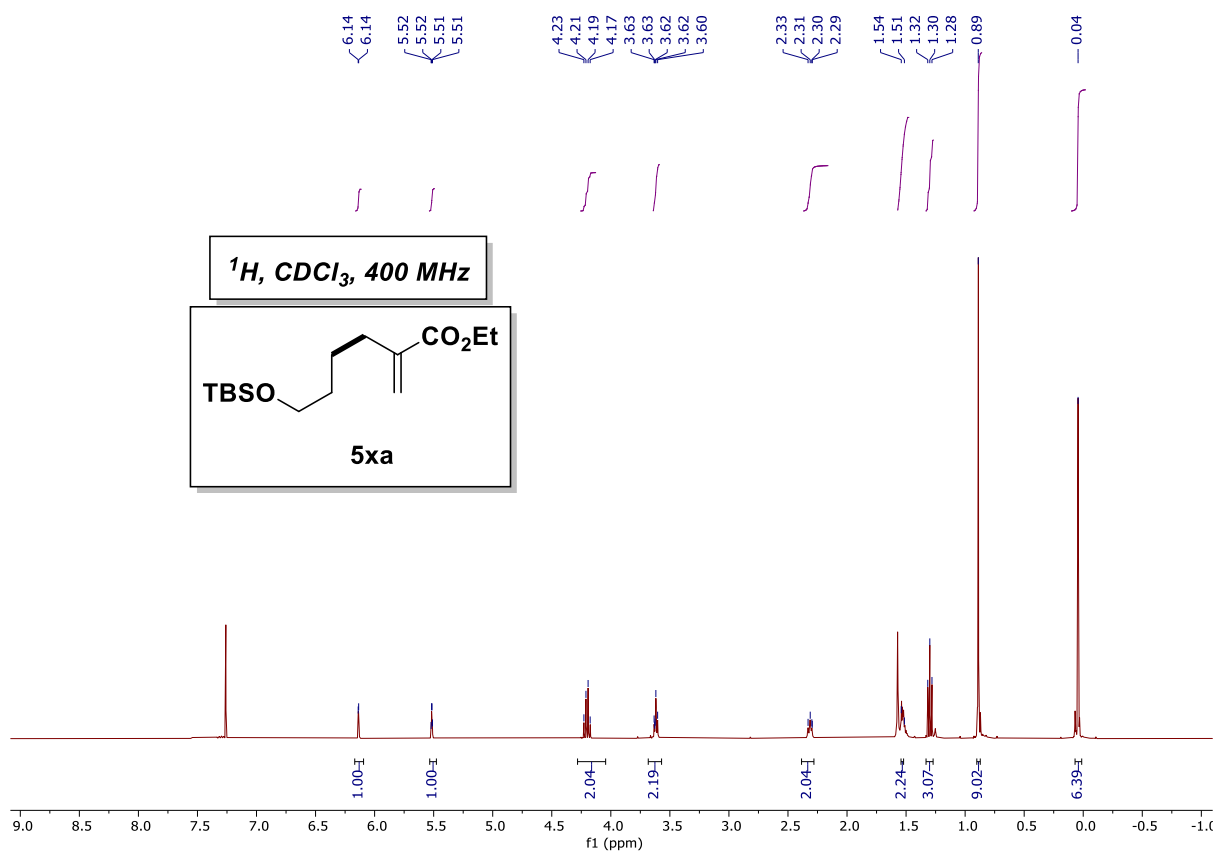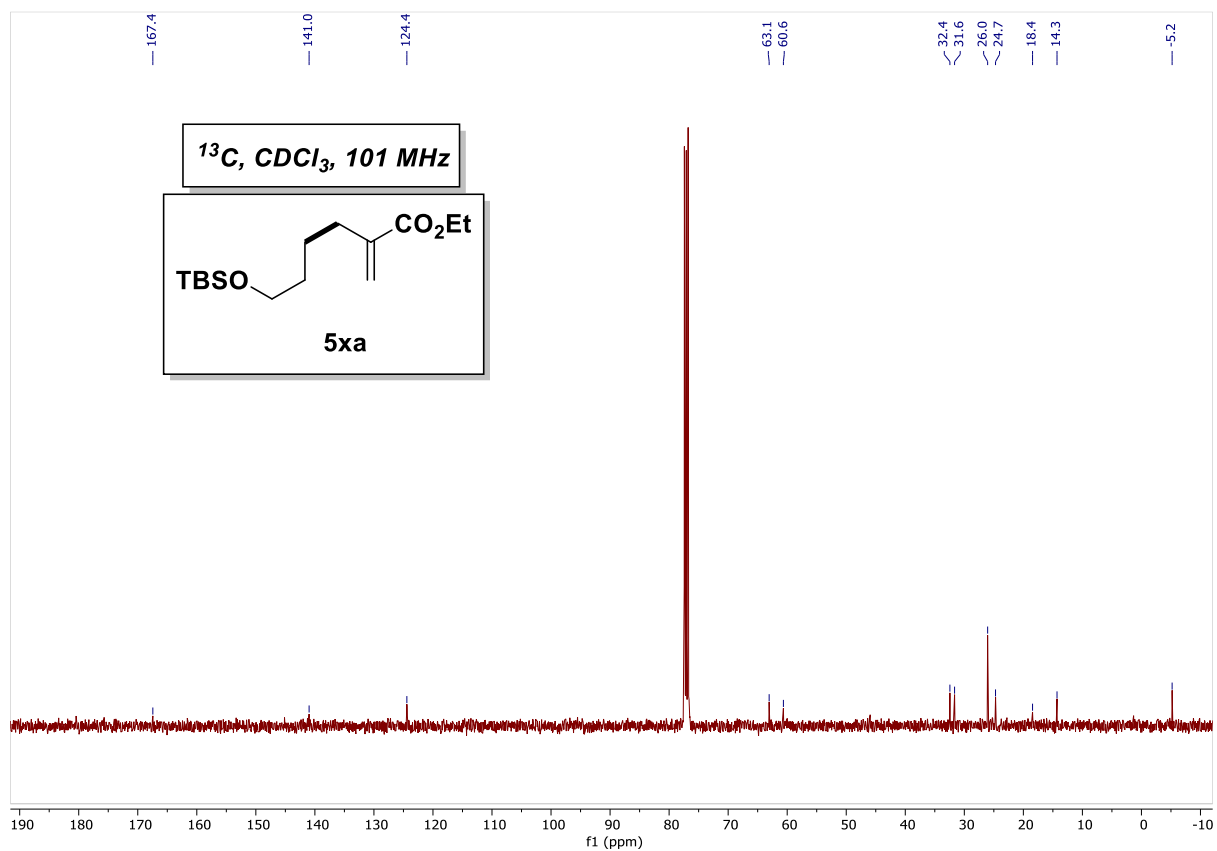



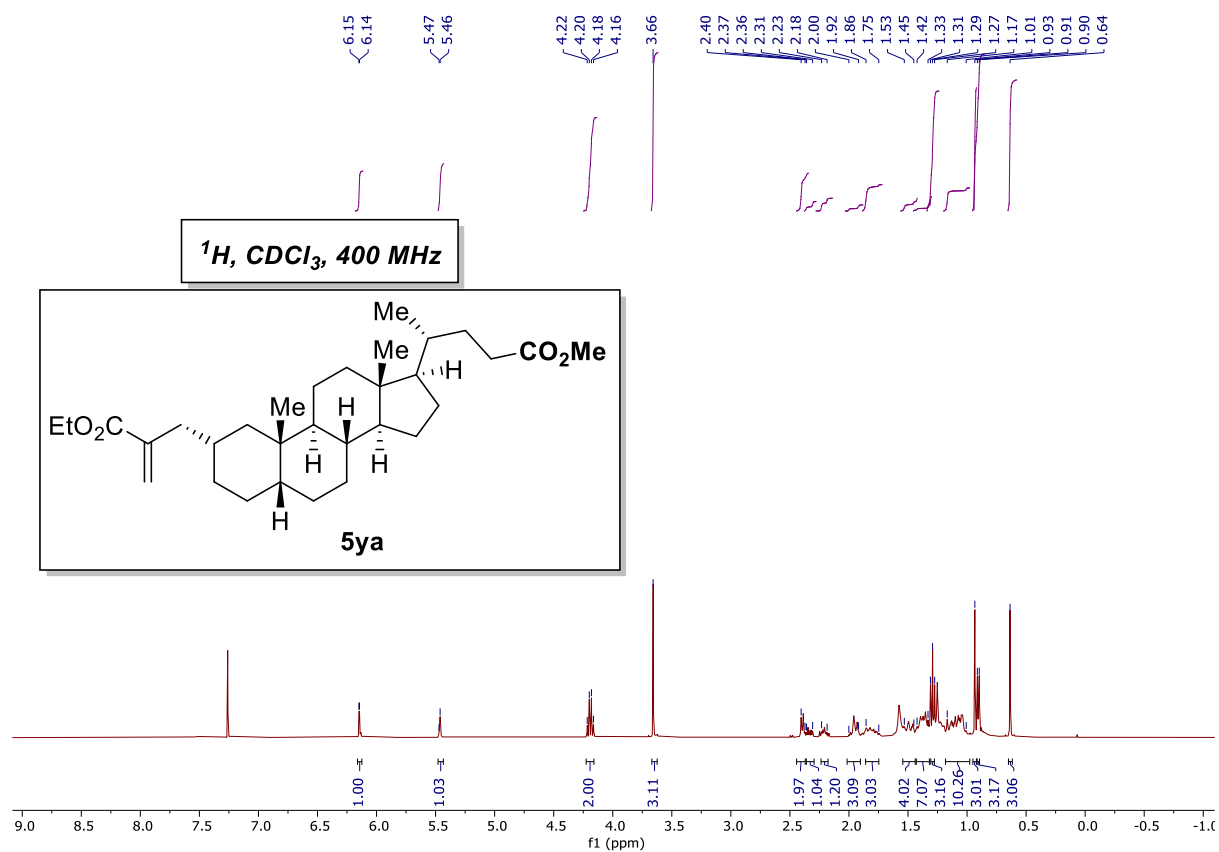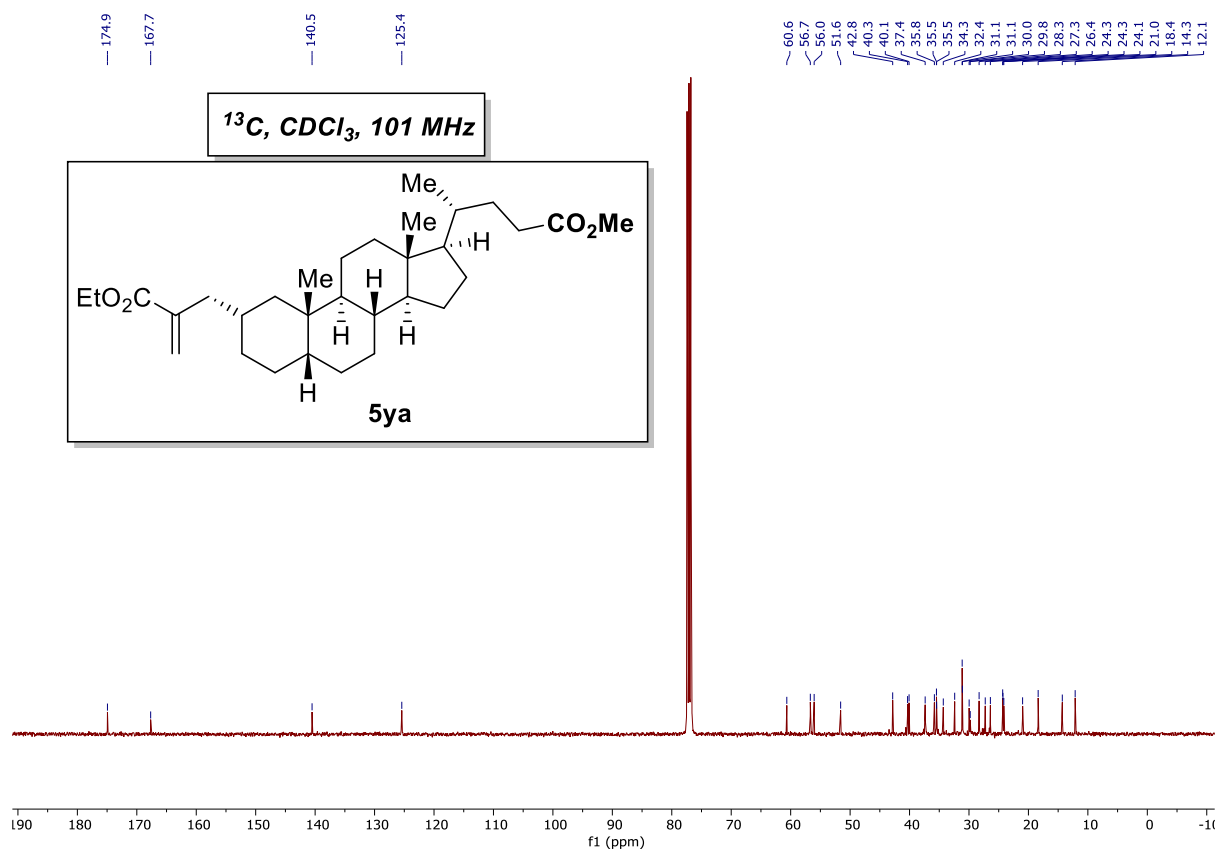

Supplement: d2cc00163b1.pdf [file d2cc00163b1.pdf]
